# Supplementary material for: Description of heteroaromaticity on the basis of π-electron density anisotropy
Source: Royal Society of Chemistry journal article supplement (doi:10.1039/c4cp01125b), 2014-01-01
Supplement: c4cp01125b1.pdf [file c4cp01125b1.pdf]

# Supporting Information

## Description of heteroaromaticity on the basis of $\pi$ -electron density anisotropy

Rohoullah Firouzi and Sahar Sharifi Ardani

*Department of Physical Chemistry, Chemistry and Chemical Engineering Research Center of  
Iran, P.O. Box 14968-13151, Tehran, Iran*

E-mails: [RFirouzi@ccerci.ac.ir](mailto:RFirouzi@ccerci.ac.ir) and [firouzi.chemist@yahoo.com](mailto:firouzi.chemist@yahoo.com)

**F1** → the plots of total electron density and its  $\sigma$ - and  $\pi$ -contributions vs. distance for all studied compounds → **pages 3-7.**

**F2** → the plots of Hessian eigenvalues vs. distance for all studied species → **pages 8-45.**

**S1** → the definition of employed equations to depict parametric plots → **page 46.**

**T1** → the maximum values of total electron density and its  $\sigma$ - and  $\pi$ -contributions along the scan axis in atomic units for all studied compounds → **pages 47-48.**

**T2** → the numerical values of the electron density and its Hessian eigenvalues for all studied species → **pages 49-86.**

**F1.** The plot of  $\rho_{total}$  (blue dotted line) and its components,  $\rho_{\sigma}$  (red dashed line) and  $\rho_{\pi}$  (green solid line) versus distance (horizontal axis) from the ring center for five-membered ring systems ( $C_4H_4X$ ), presented at the same scale for comparison purpose.

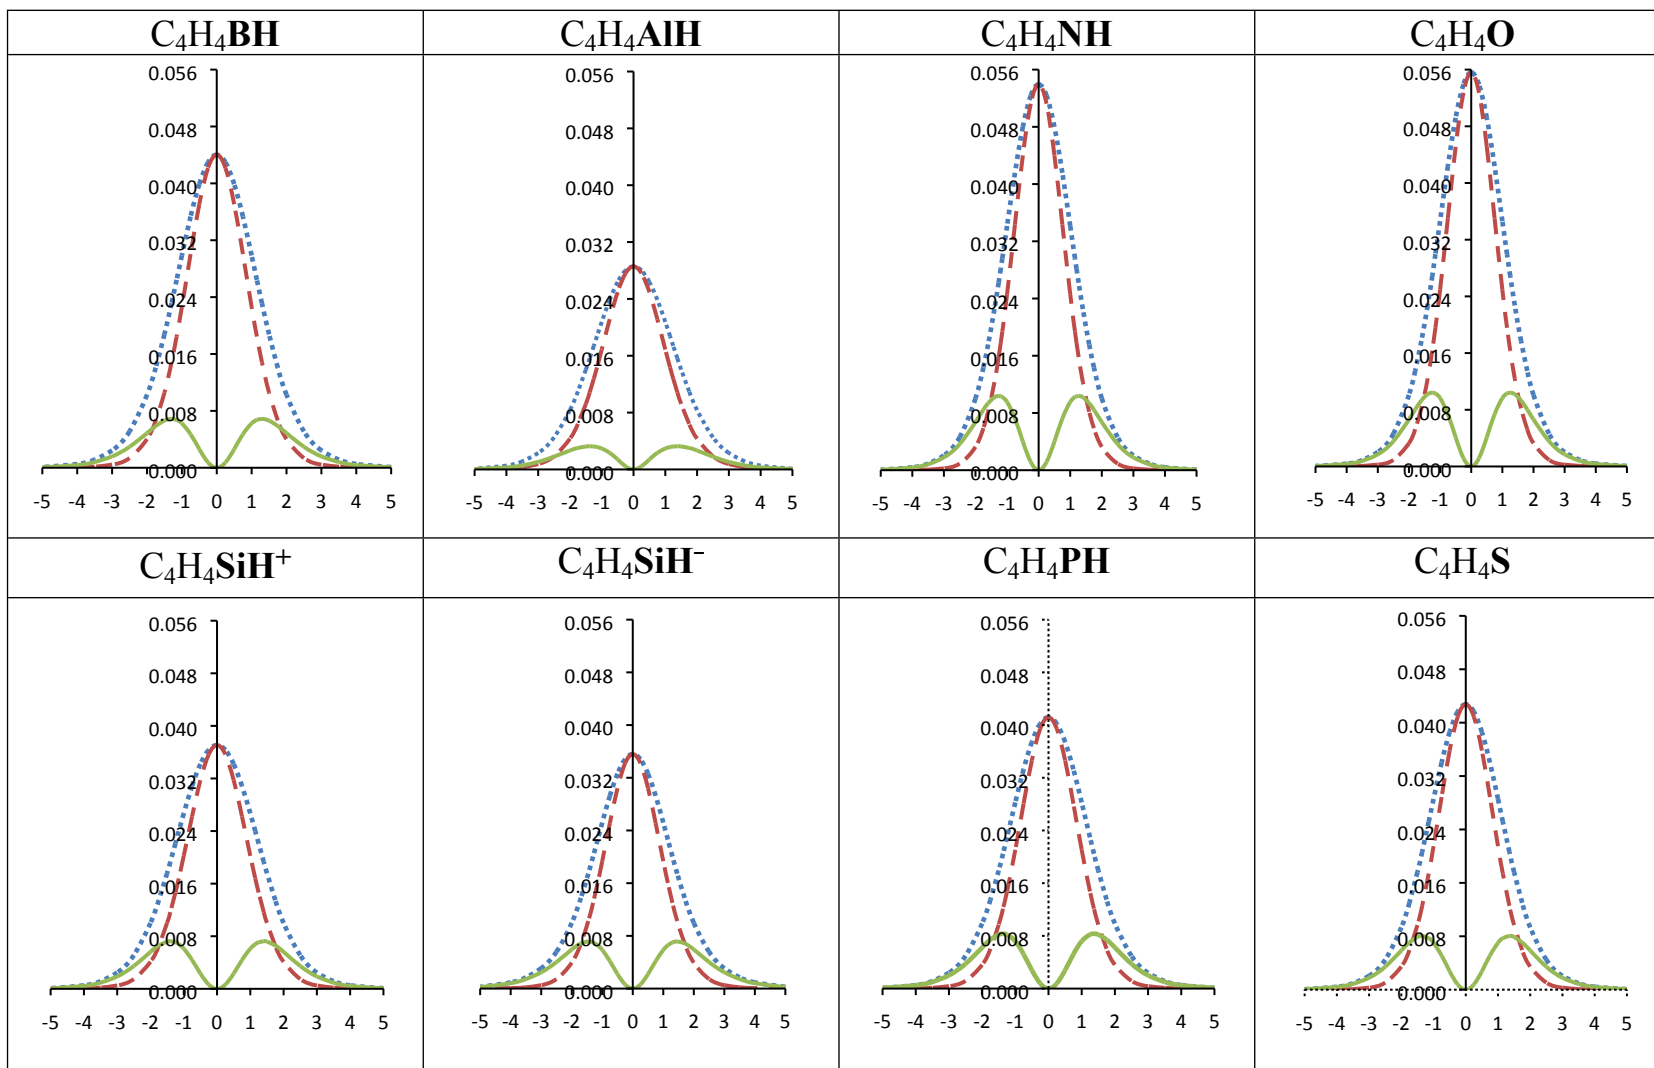

**F1(continued).** The plot of  $\rho_{total}$  (blue dotted line) and its components,  $\rho_\sigma$  (red dashed line) and  $\rho_\pi$  (green solid line) versus distance (horizontal axis) from the ring center for six-membered ring systems ( $C_5H_5X$ ), presented at the same scale for comparison purpose.

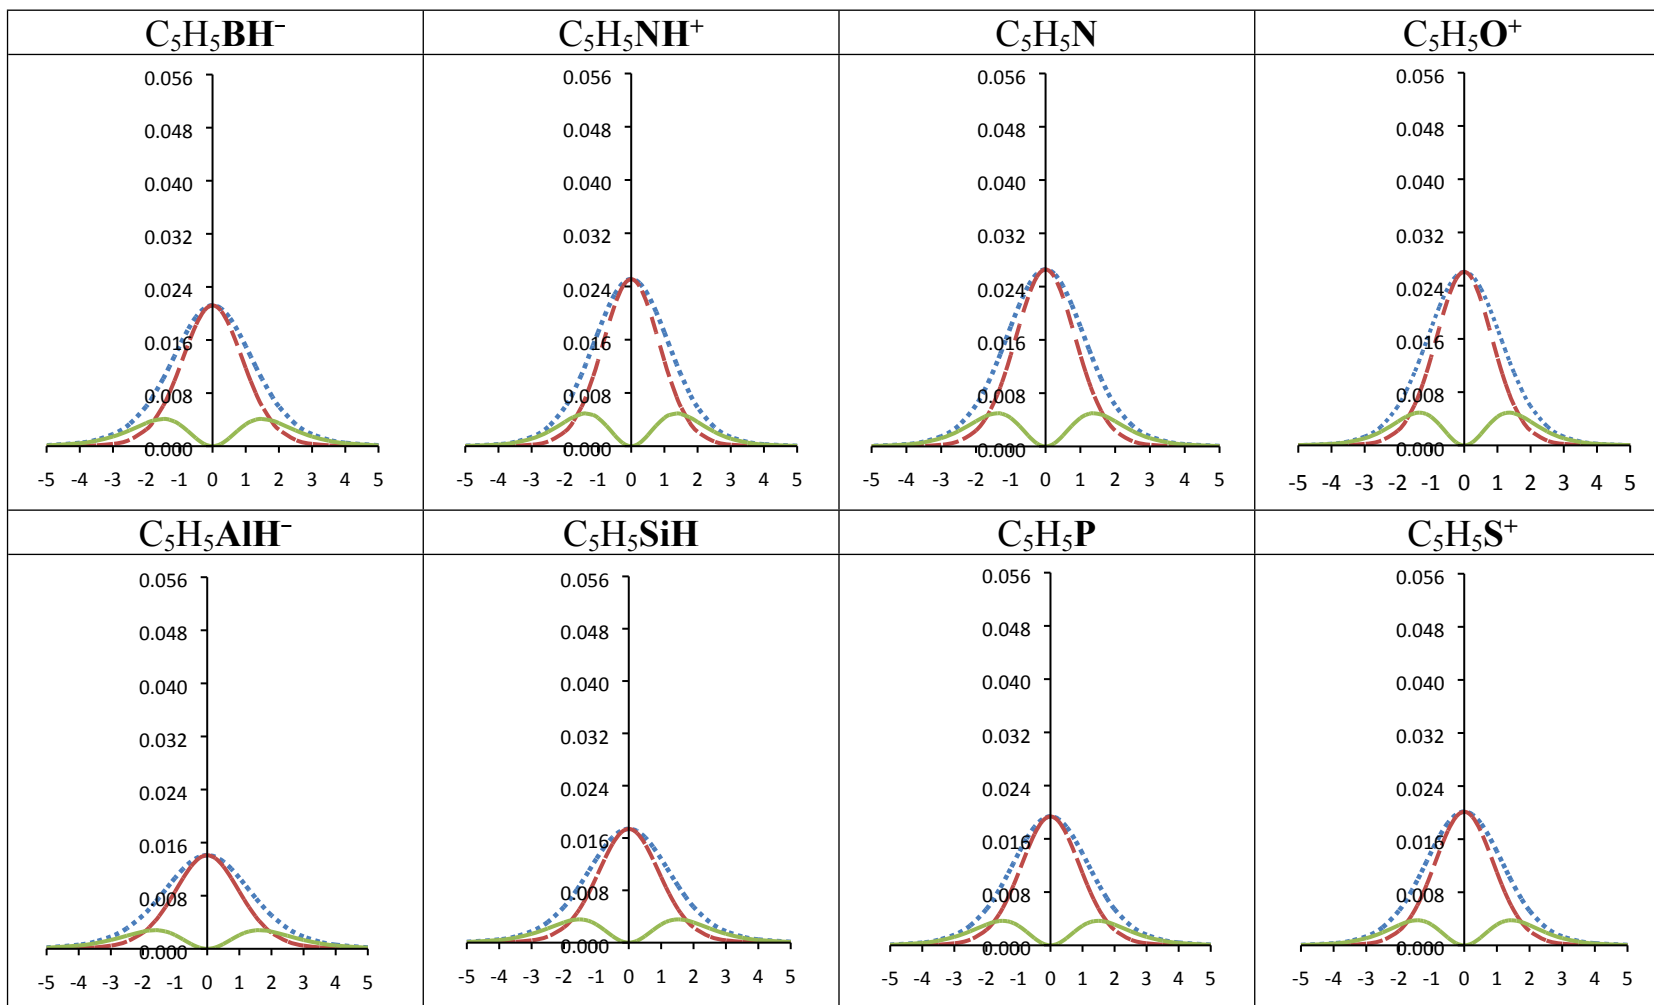

**F1(continued).** The plot of  $\rho_{total}$  (blue dotted line) and its components,  $\rho_\sigma$  (red dashed line) and  $\rho_\pi$  (green solid line) versus distance (horizontal axis) from the ring center for seven-membered ring systems ( $C_6H_6X$ ), presented at the same scale for comparison purpose.

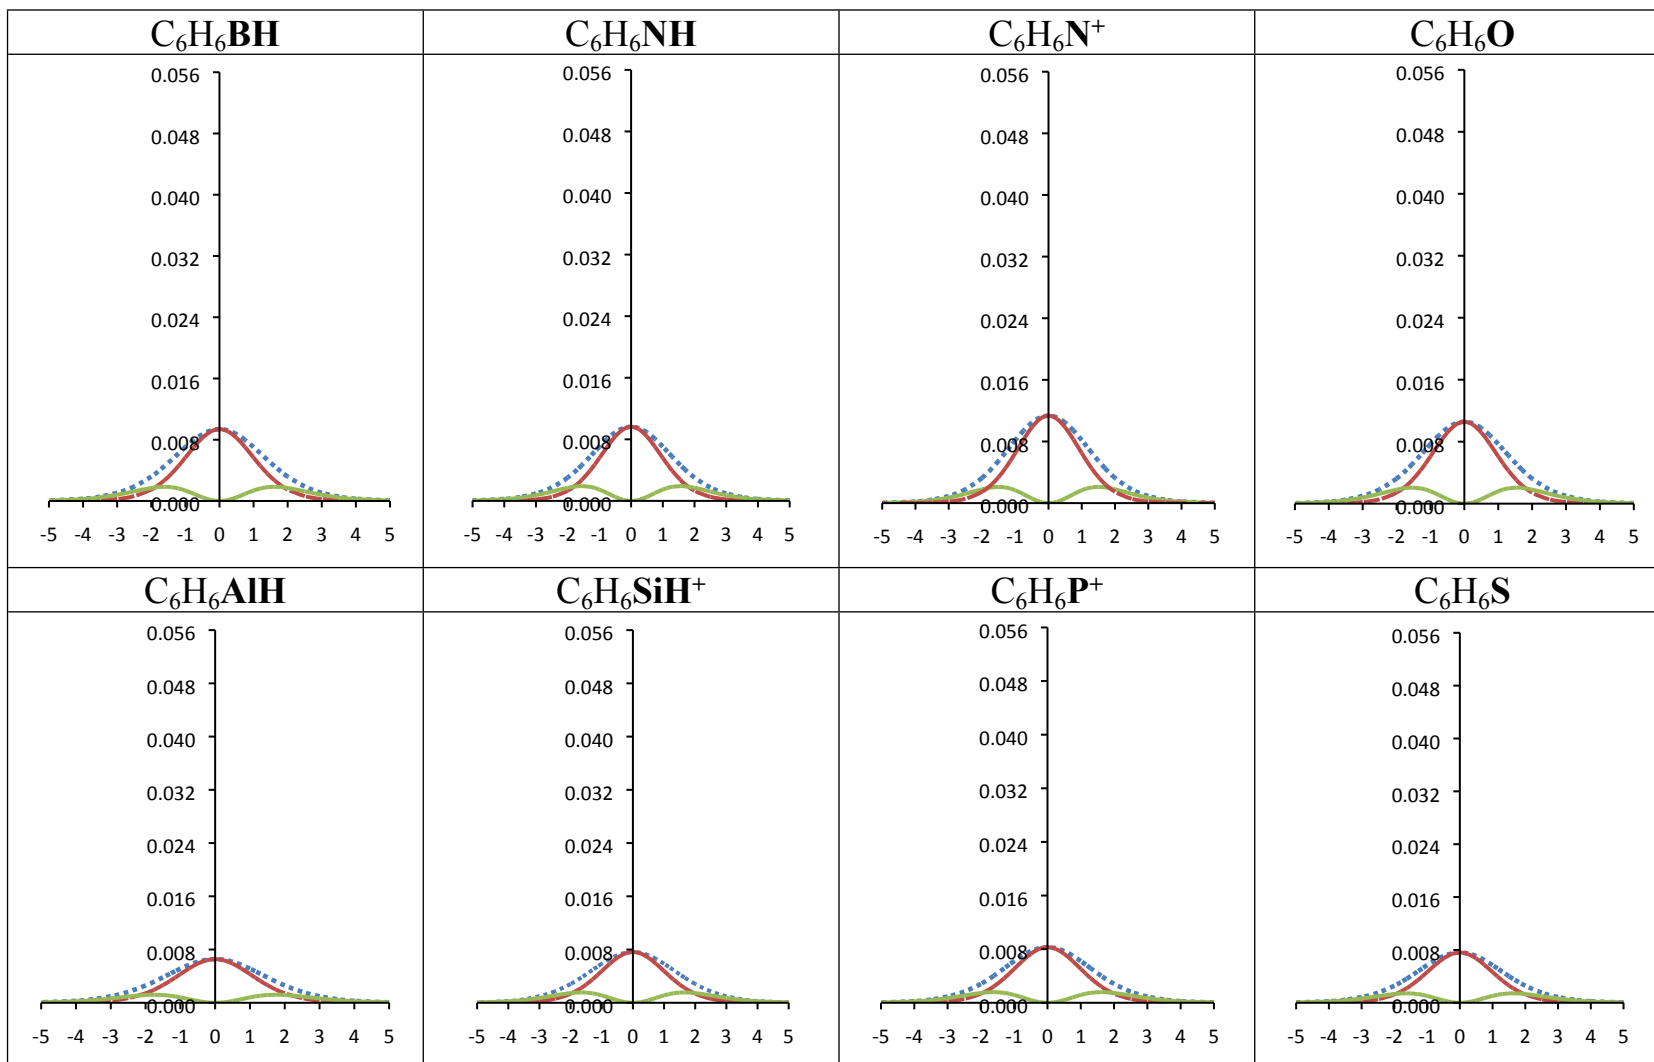

**F1(continued).** The plot of  $\rho_{total}$  (blue dotted line) and its components,  $\rho_\sigma$  (red dashed line) and  $\rho_\pi$  (green solid line) versus distance (horizontal axis) from the ring center for studied azines, presented at the same scale for comparison purpose.

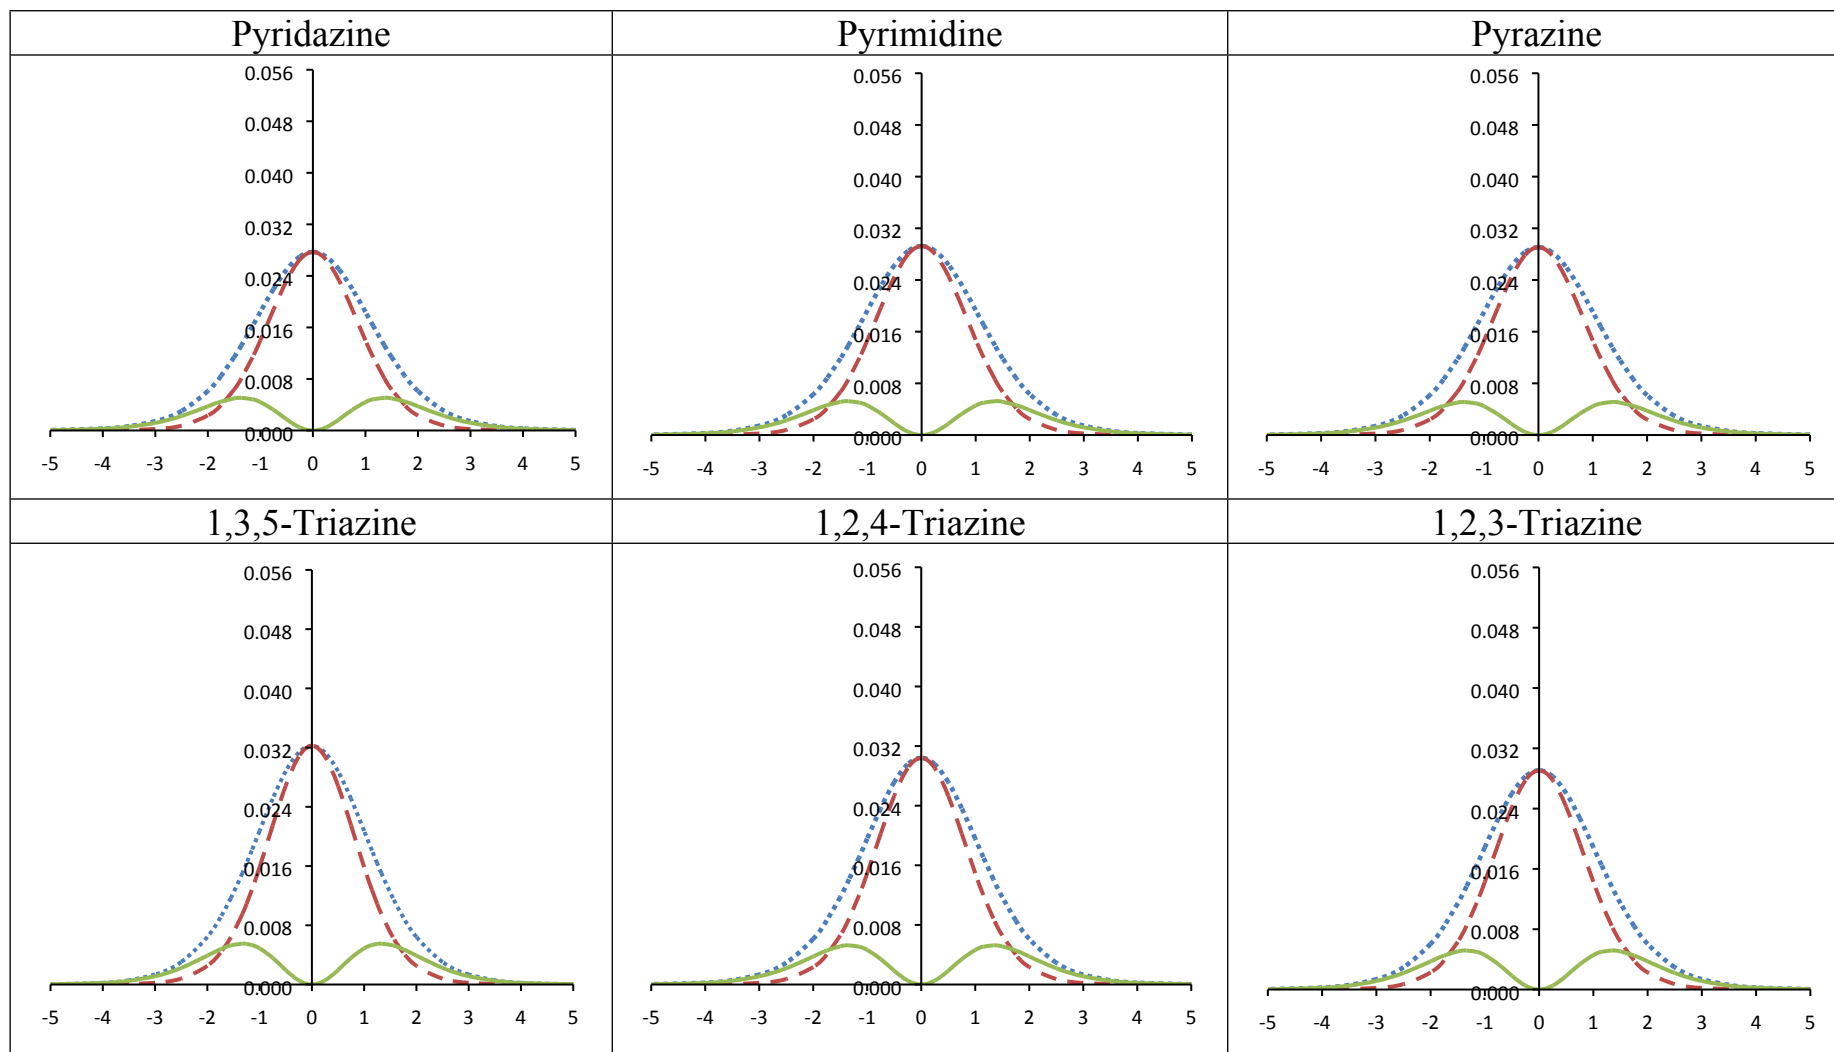

**F1(continued).** The plot of  $\rho_{total}$  (blue dotted line) and its components,  $\rho_{\sigma}$  (red dashed line) and  $\rho_{\pi}$  (green solid line) versus distance (horizontal axis) from the ring center for substituted fulvene systems ( $C_nH_{n-1}X$ ), presented at the same scale for comparison purpose.

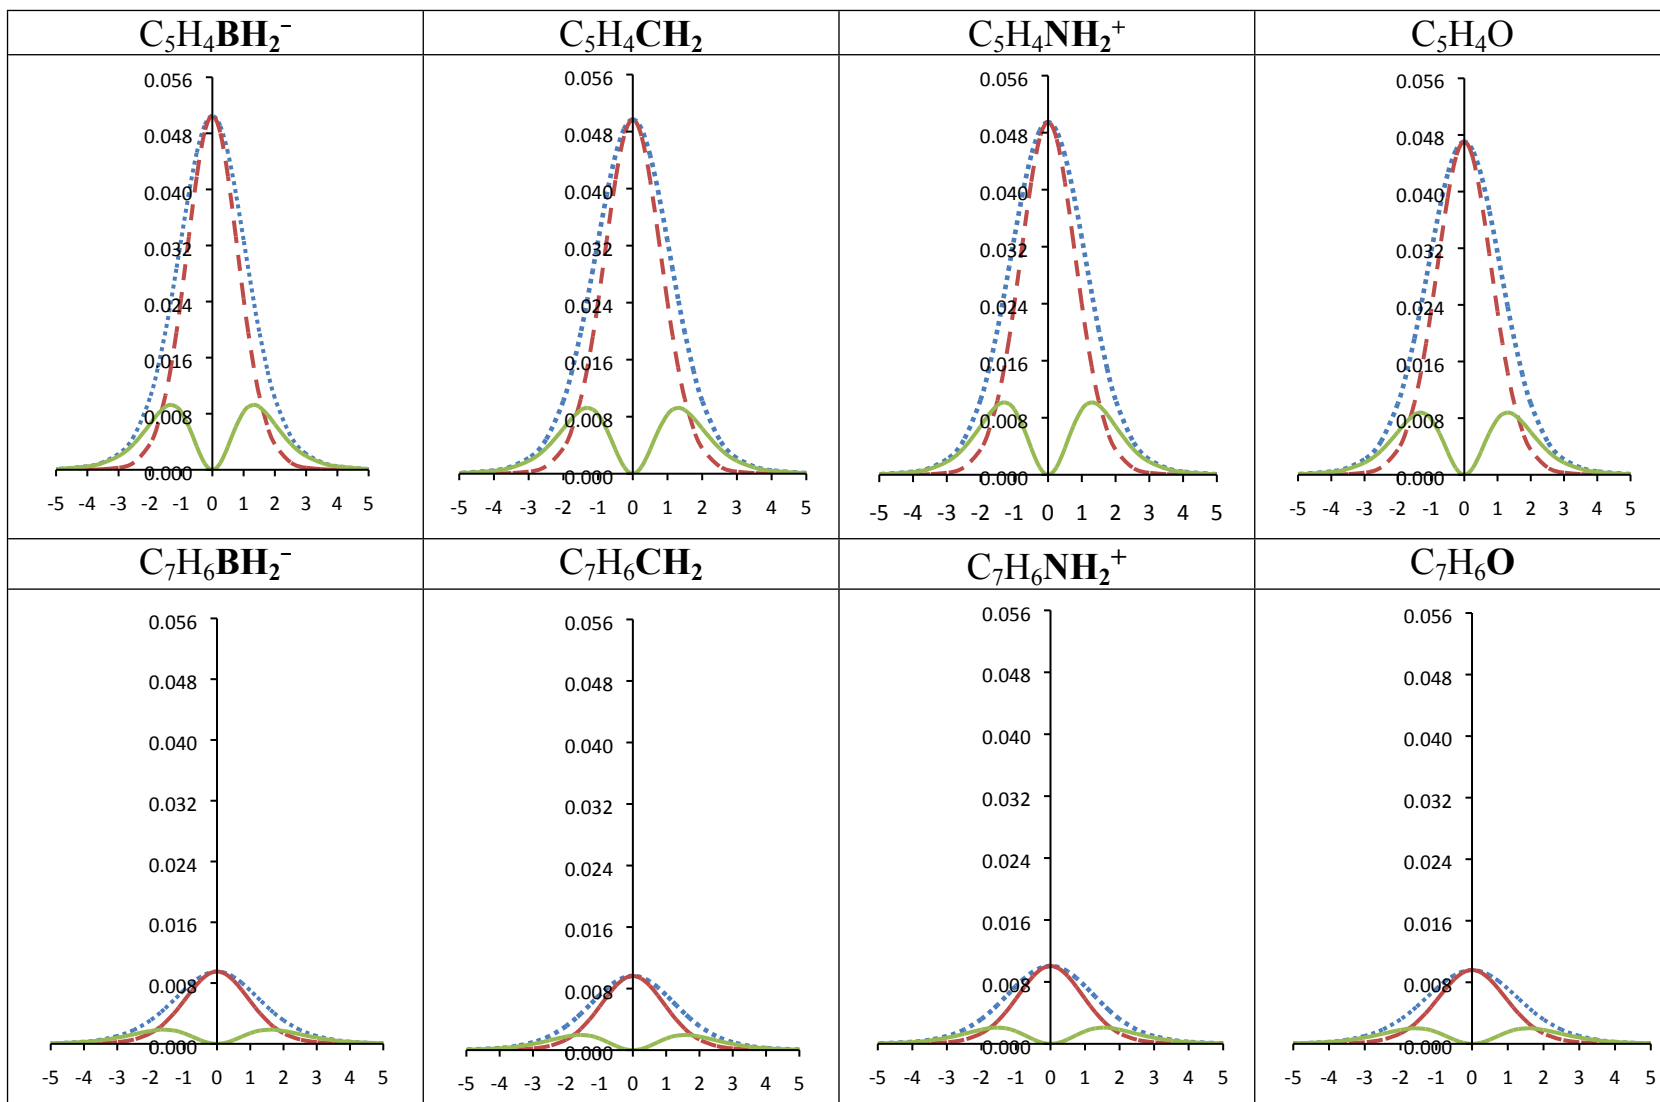

**F2.** The plot of Hessian's eigenvalues of  $\rho_{total}$ ,  $\rho_{\sigma}$  and  $\rho_{\pi}$  versus distance (horizontal axis) from the ring center of  $C_4H_4BH$ . The two in-plane eigenvalues have been depicted by red dotted line and blue dashed line while the eigenvalue normal to the ring plane have shown by green solid line. The plots have been presented at the same scale for comparison purpose.

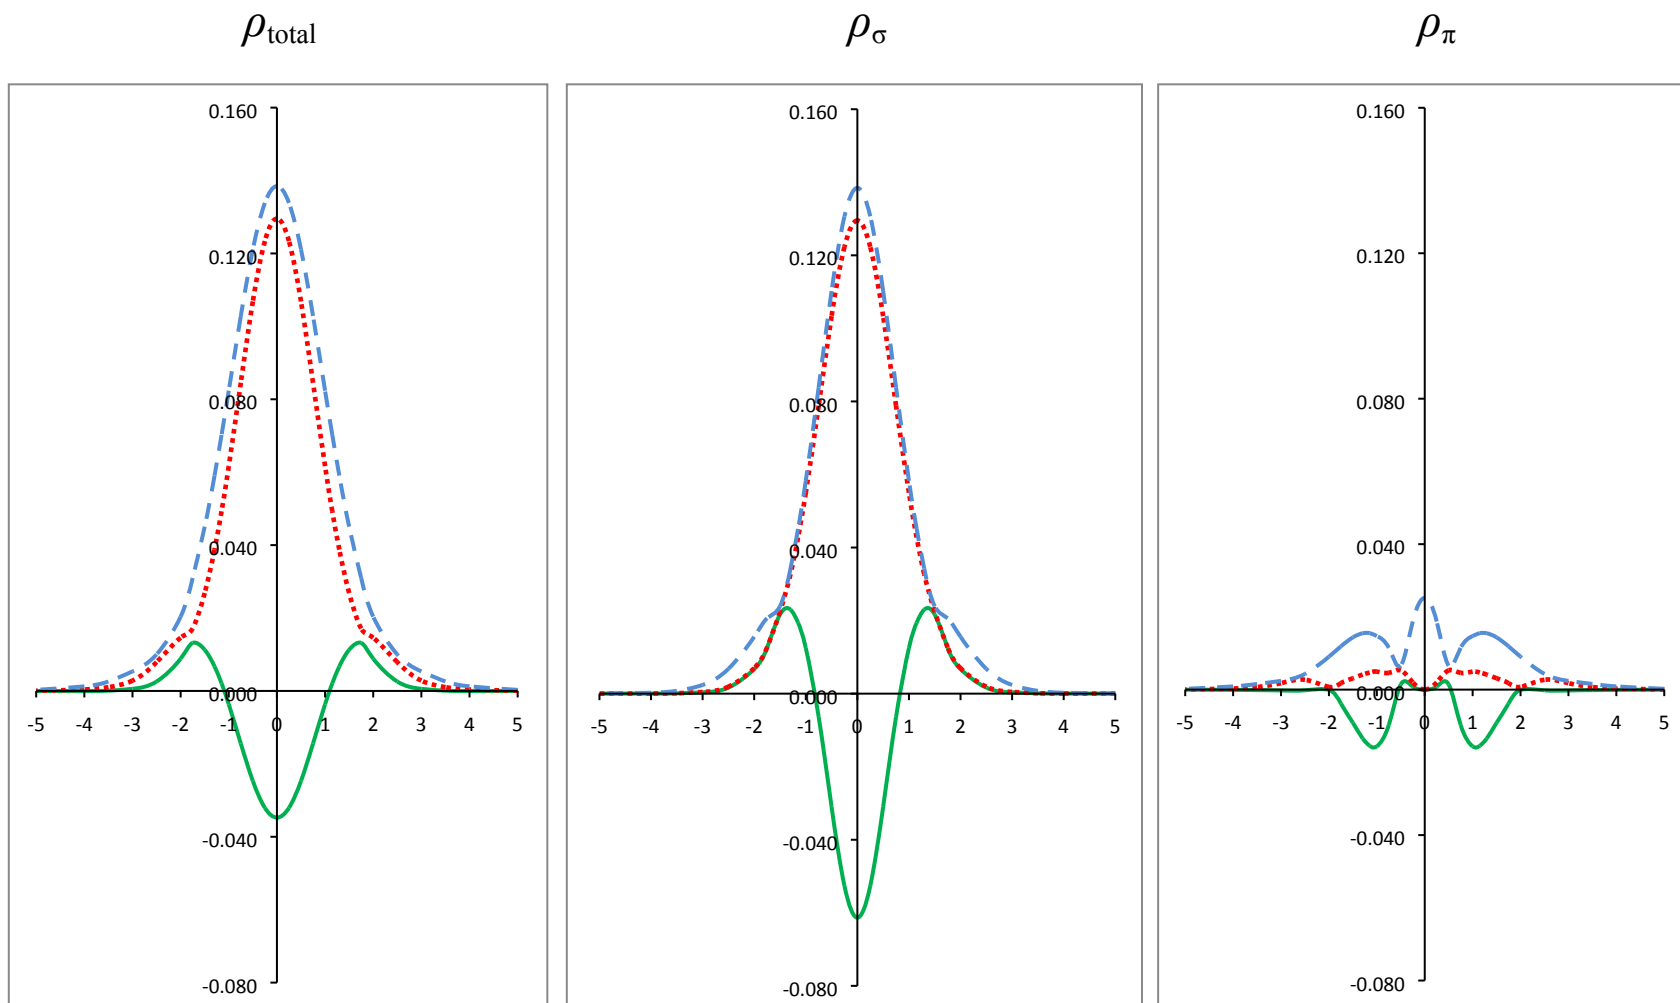



**F2 (continued).** The plot of Hessian's eigenvalues of  $\rho_{total}$ ,  $\rho_{\sigma}$  and  $\rho_{\pi}$  versus distance (horizontal axis) from the ring center of  $C_4H_4AlH$ .

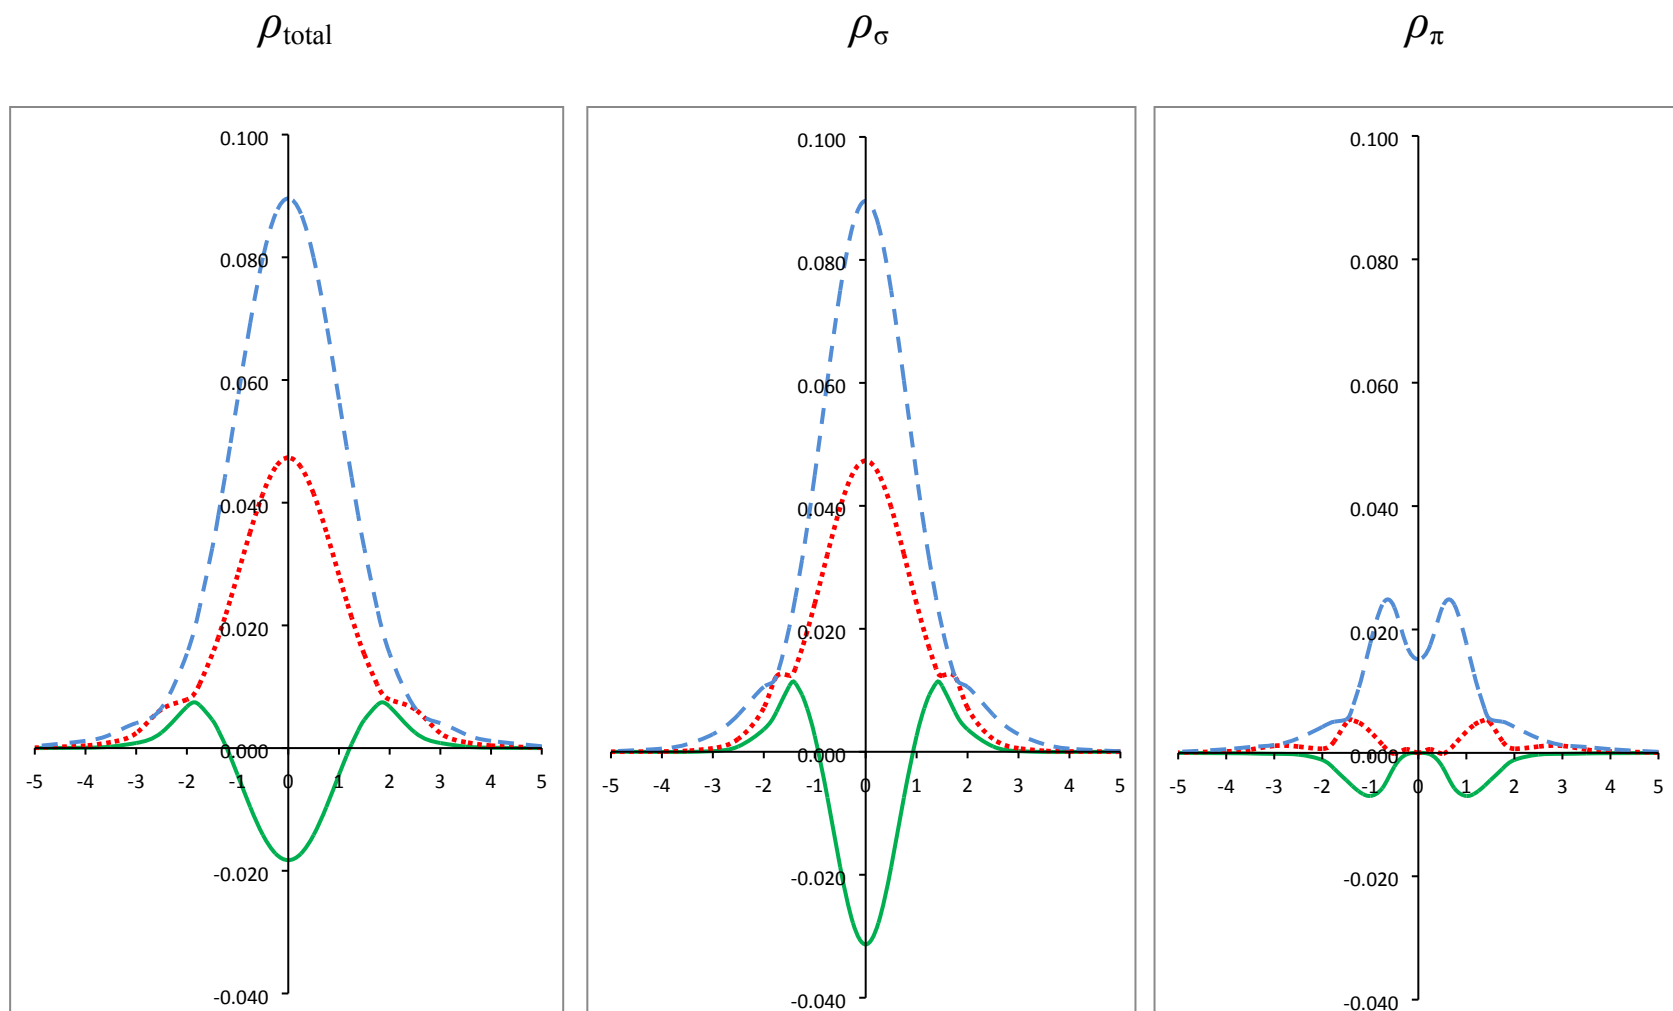

**F2 (continued).** The plot of Hessian's eigenvalues of  $\rho_{total}$ ,  $\rho_{\sigma}$  and  $\rho_{\pi}$  versus distance (horizontal axis) from the ring center of  $C_4H_4SiH^+$ .

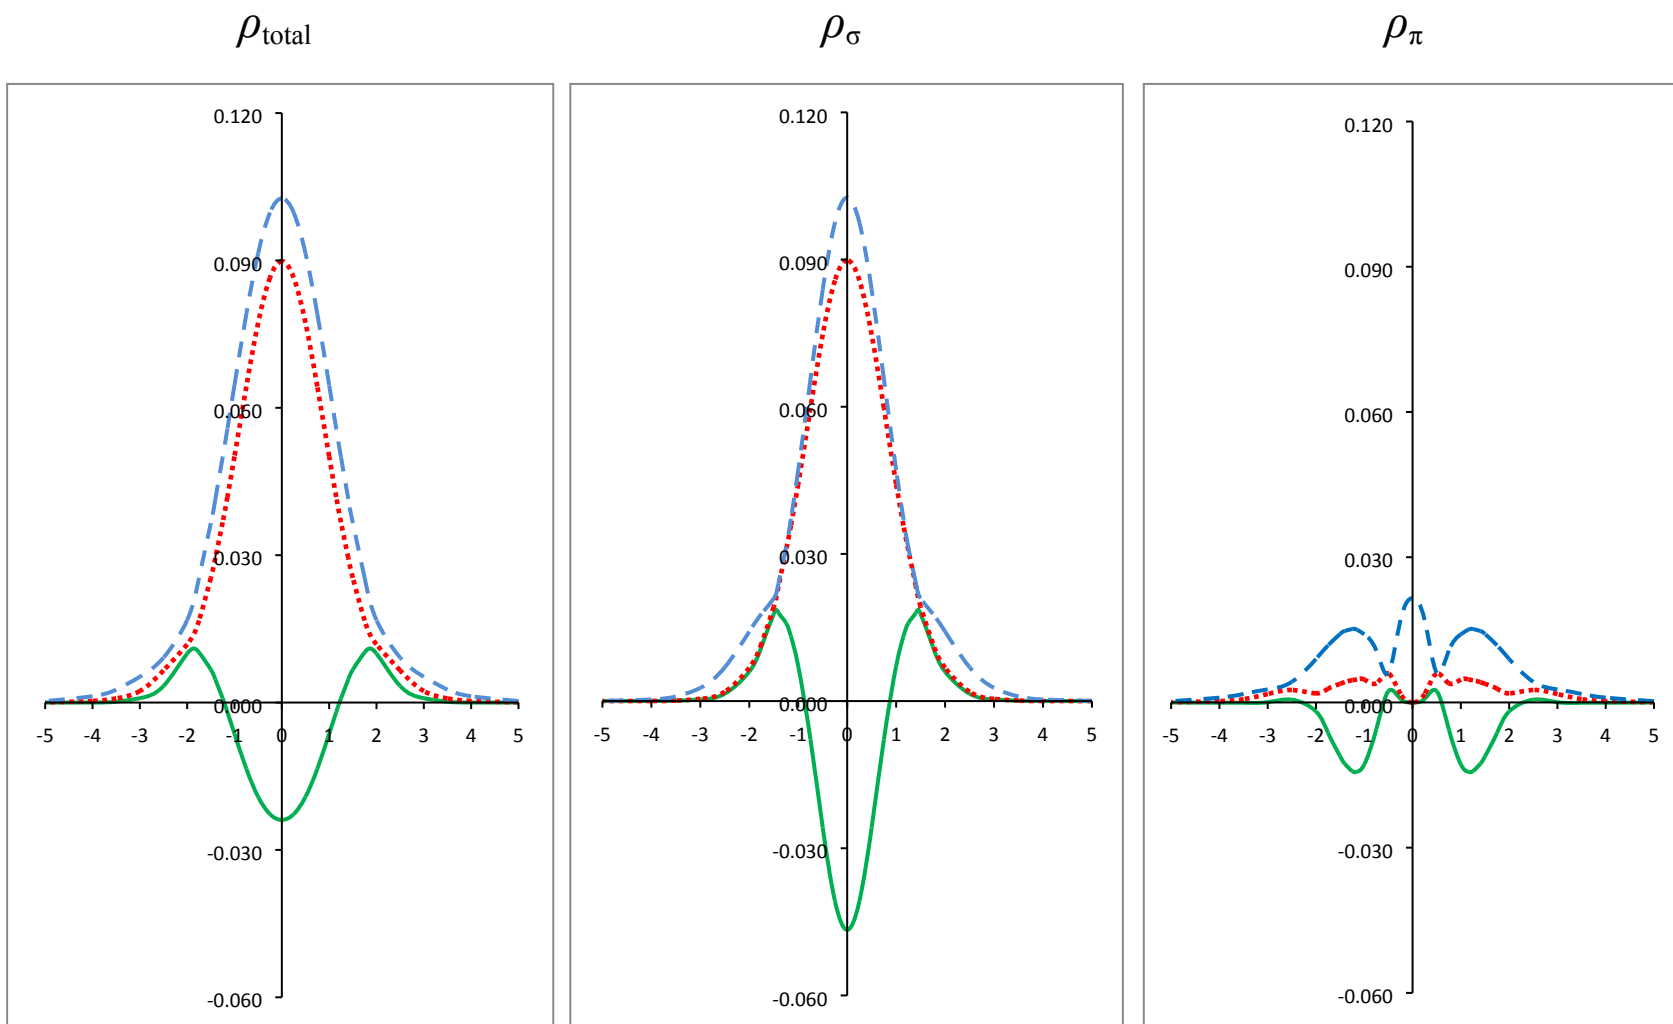

**F2 (continued).** The plot of Hessian's eigenvalues of  $\rho_{total}$ ,  $\rho_{\sigma}$  and  $\rho_{\pi}$  versus distance (horizontal axis) from the ring center of  $C_4H_4SiH^-$ .

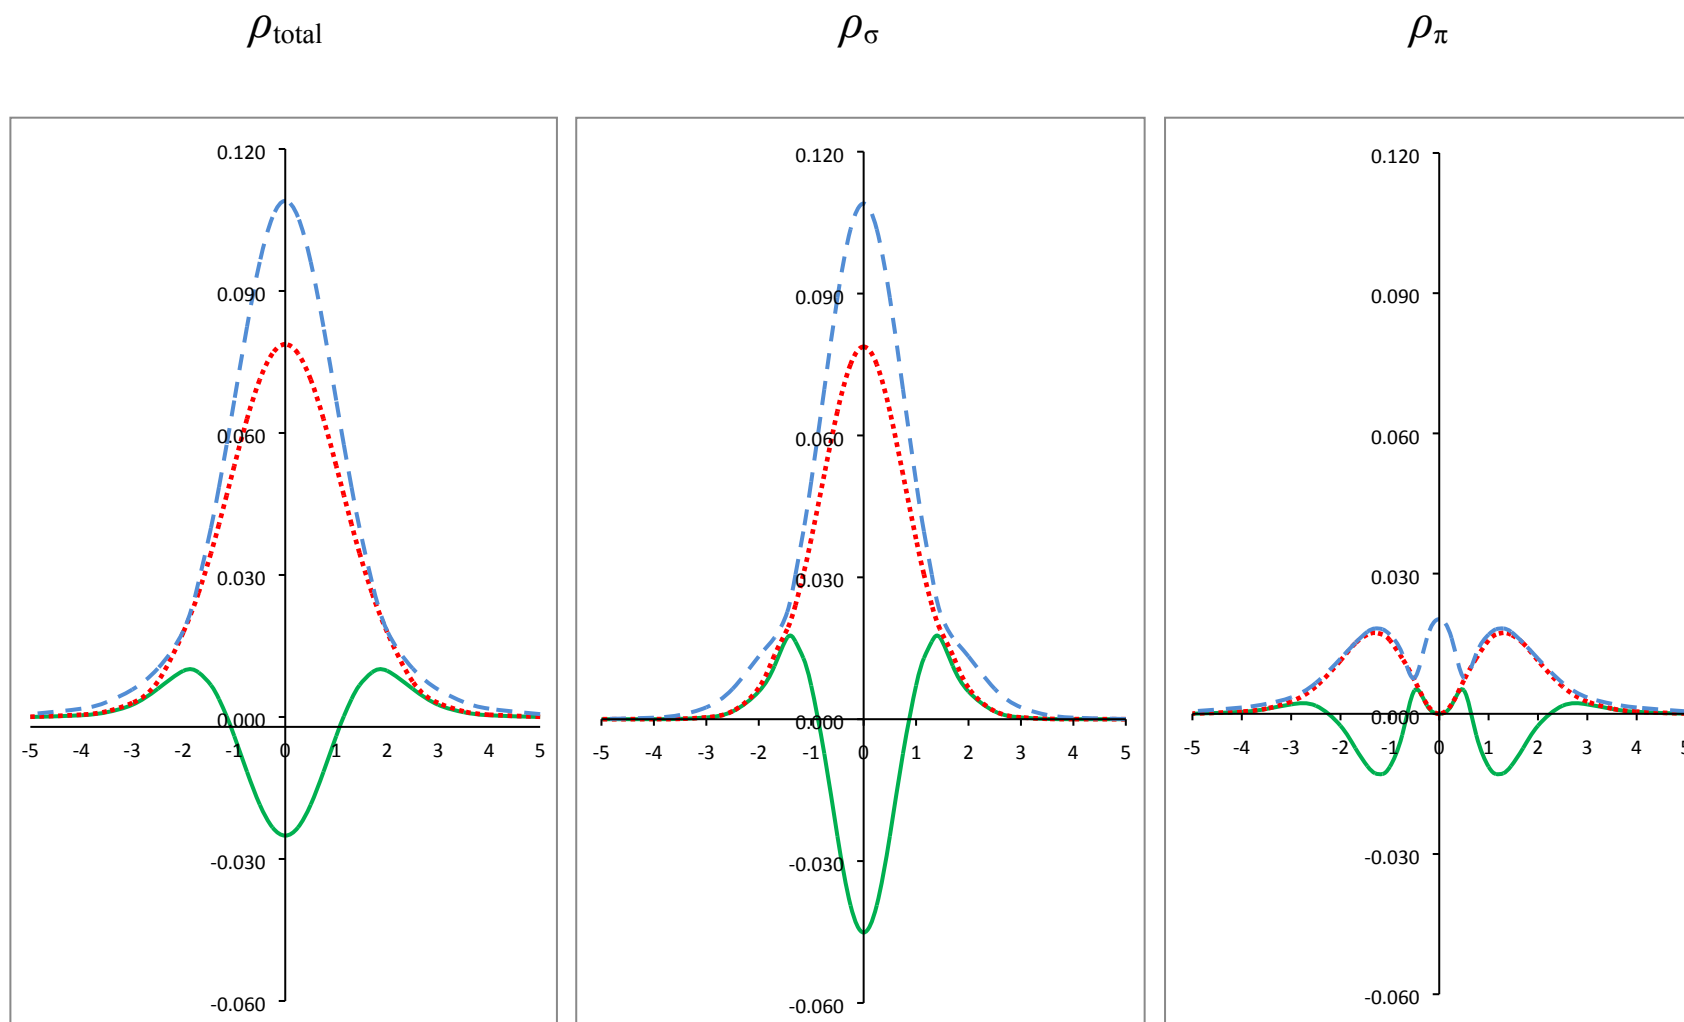

**F2 (continued).** The plot of Hessian's eigenvalues of  $\rho_{total}$ ,  $\rho_{\sigma}$  and  $\rho_{\pi}$  versus distance (horizontal axis) from the ring center of  $C_4H_4NH$ .

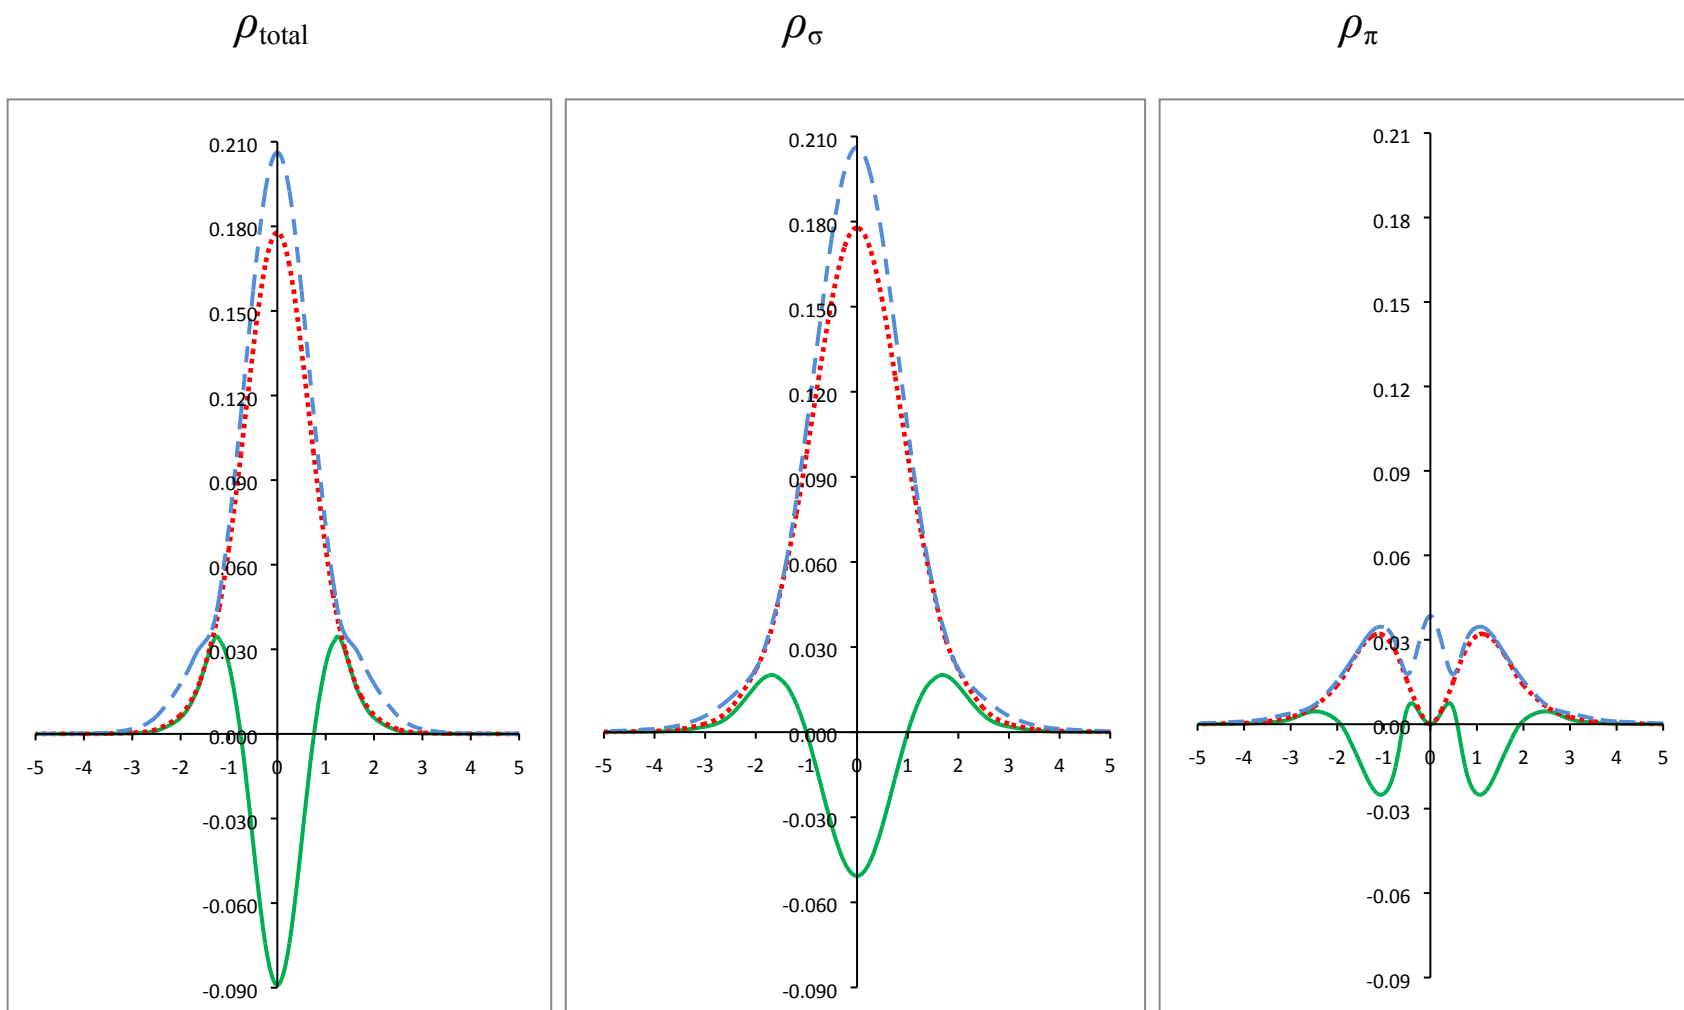

**F2 (continued).** The plot of Hessian's eigenvalues of  $\rho_{total}$ ,  $\rho_{\sigma}$  and  $\rho_{\pi}$  versus distance (horizontal axis) from the ring center of  $C_4H_4PH$ .

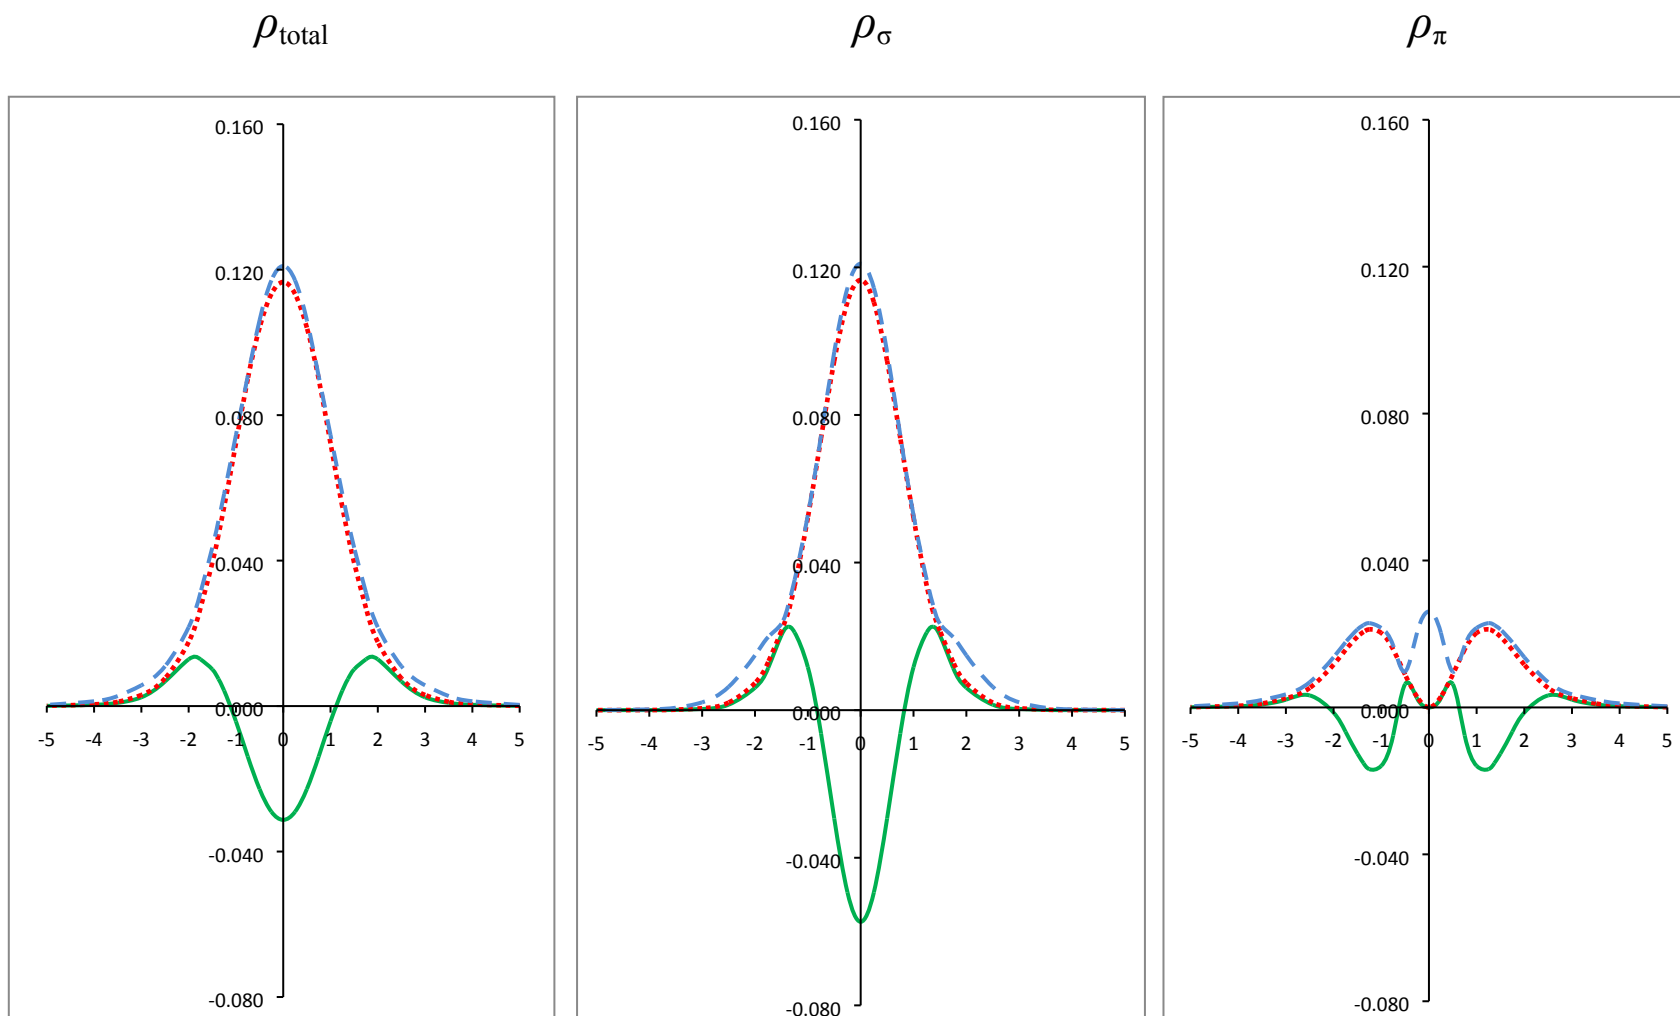

**F2 (continued).** The plot of Hessian's eigenvalues of  $\rho_{total}$ ,  $\rho_{\sigma}$  and  $\rho_{\pi}$  versus distance (horizontal axis) from the ring center of  $C_4H_4O$ .

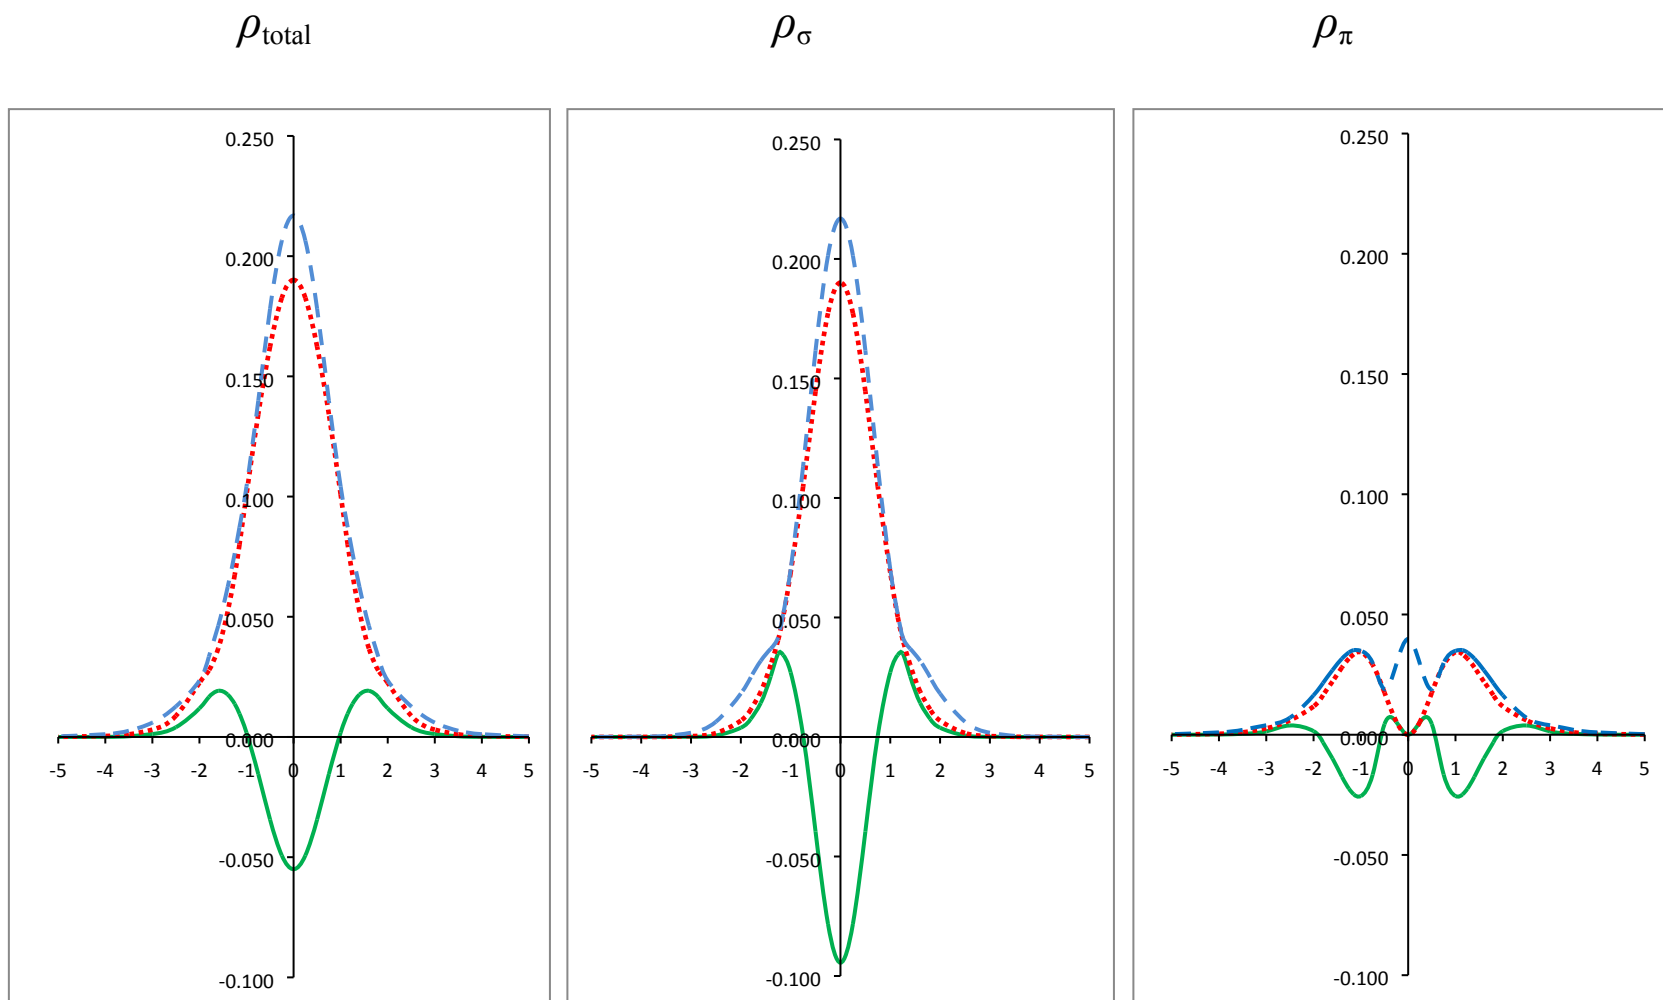

**F2 (continued).** The plot of Hessian's eigenvalues of  $\rho_{total}$ ,  $\rho_{\sigma}$  and  $\rho_{\pi}$  versus distance (horizontal axis) from the ring center of  $C_4H_4S$ .

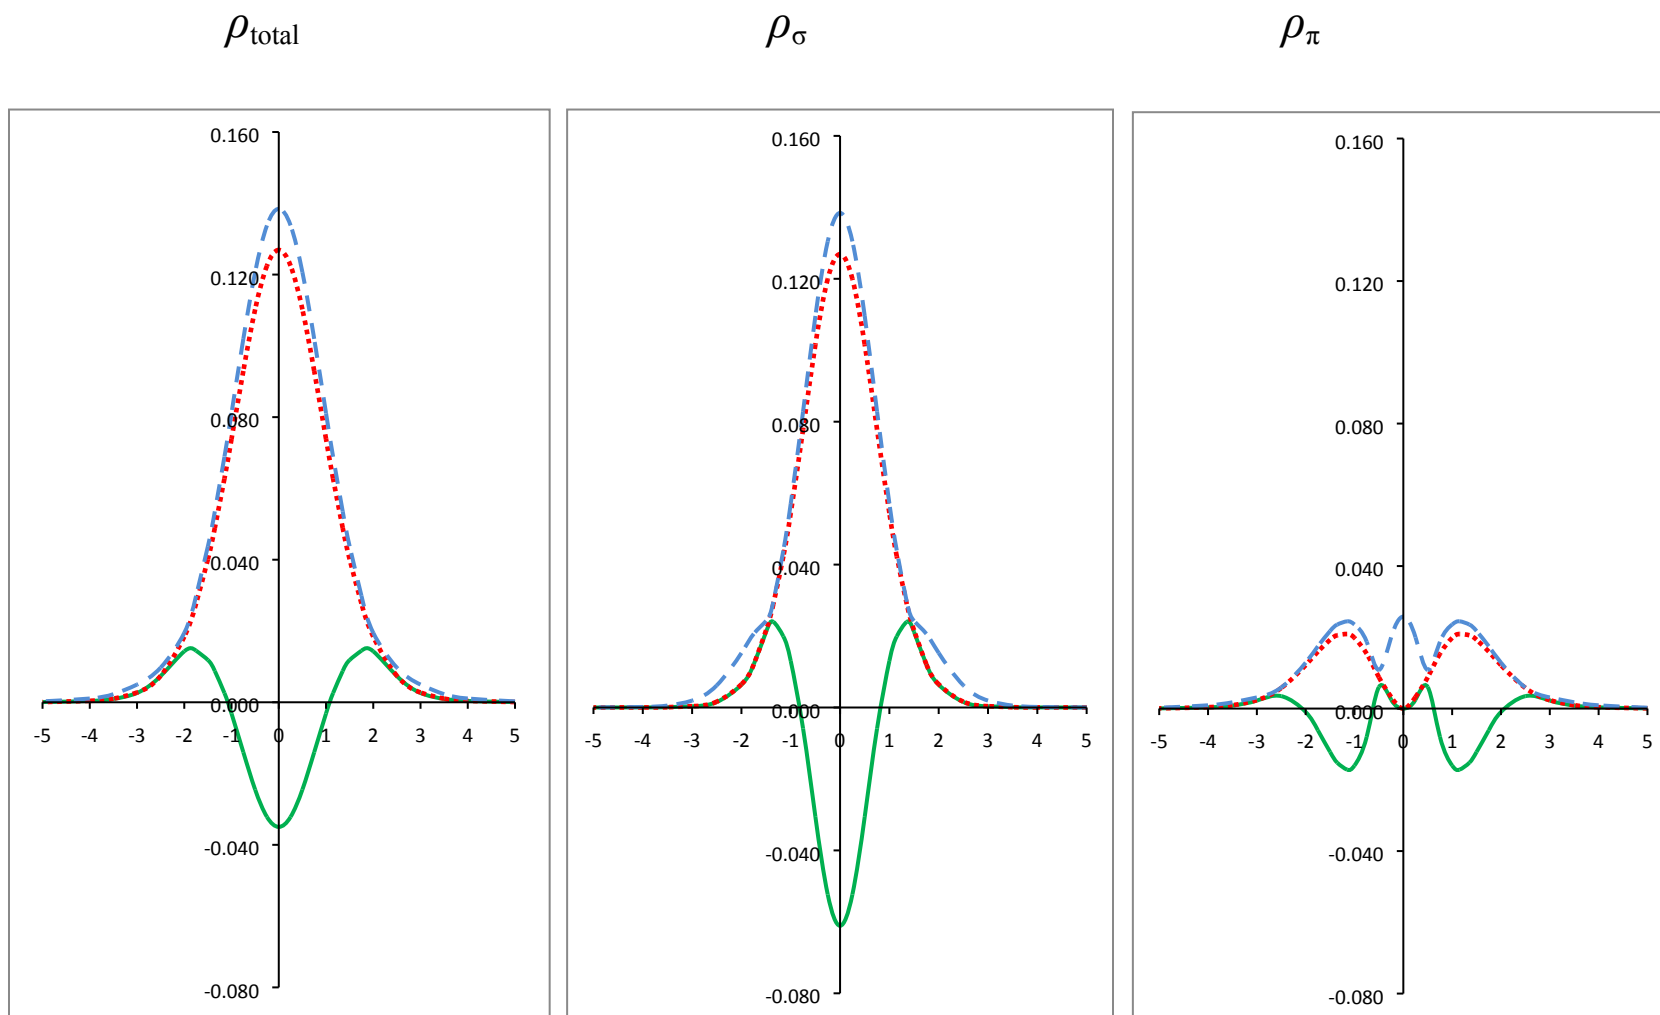

**F2 (continued).** The plot of Hessian's eigenvalues of  $\rho_{total}$ ,  $\rho_{\sigma}$  and  $\rho_{\pi}$  versus distance (horizontal axis) from the ring center of  $C_5H_5BH^-$ .

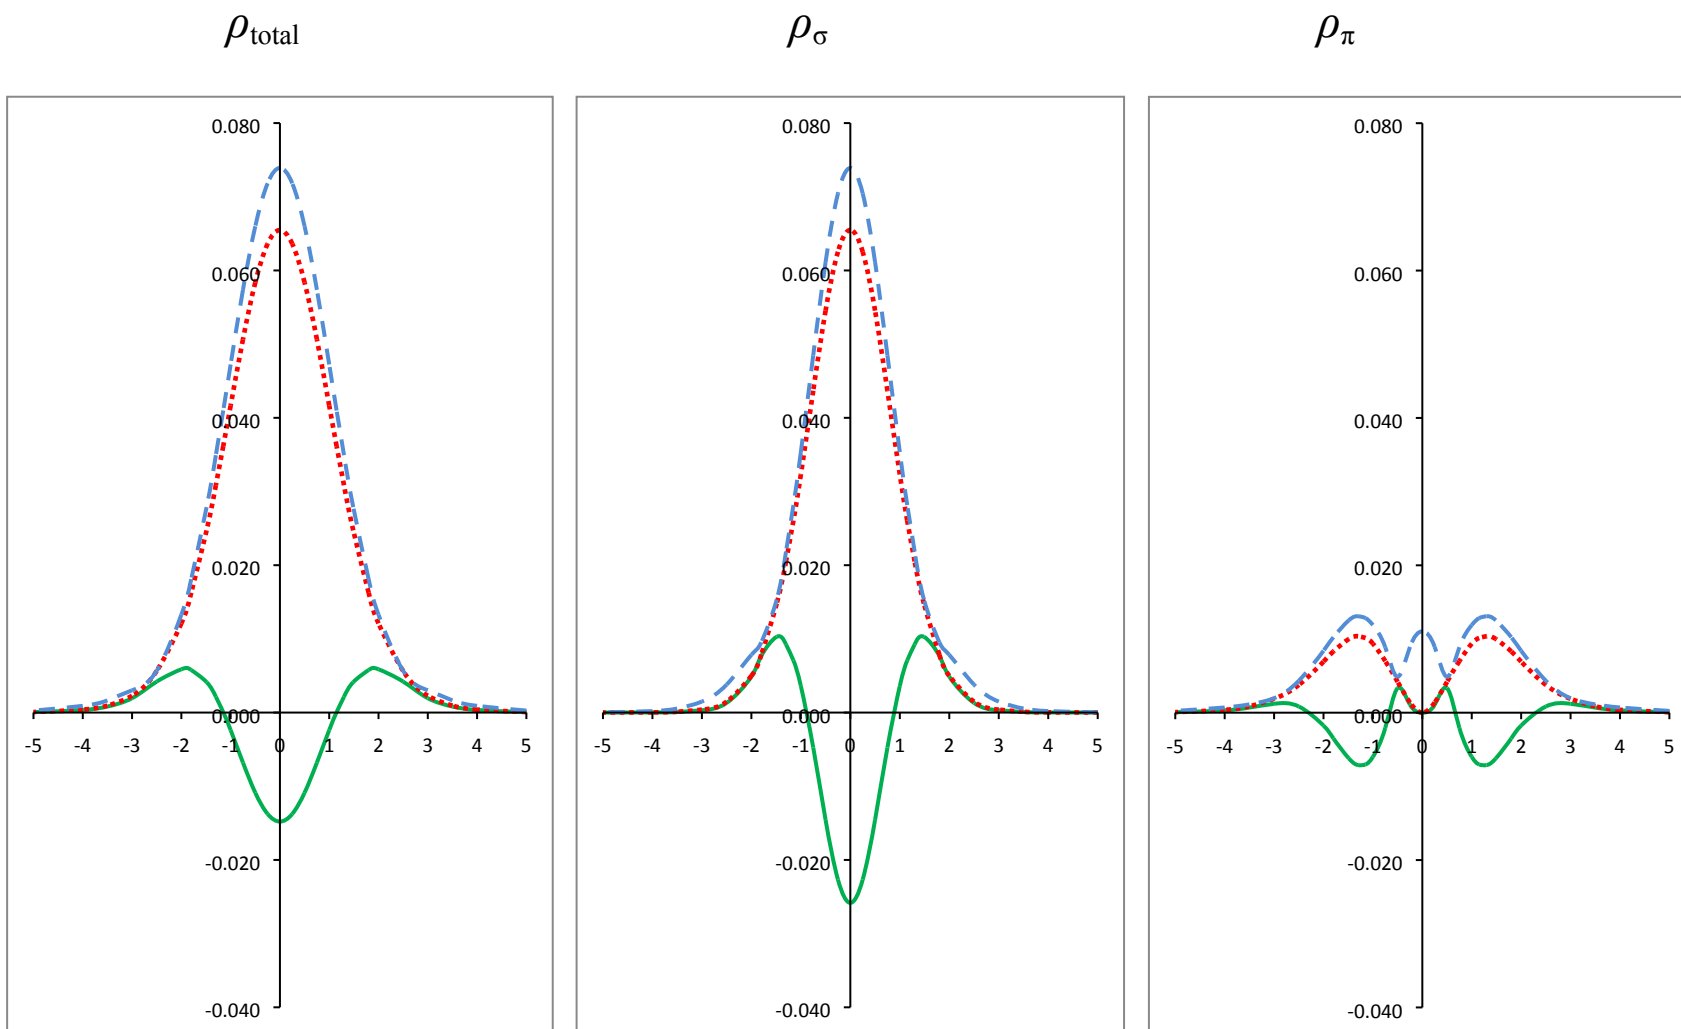



**F2 (continued).** The plot of Hessian's eigenvalues of  $\rho_{total}$ ,  $\rho_{\sigma}$  and  $\rho_{\pi}$  versus distance (horizontal axis) from the ring center of  $C_5H_5AlH^-$ .

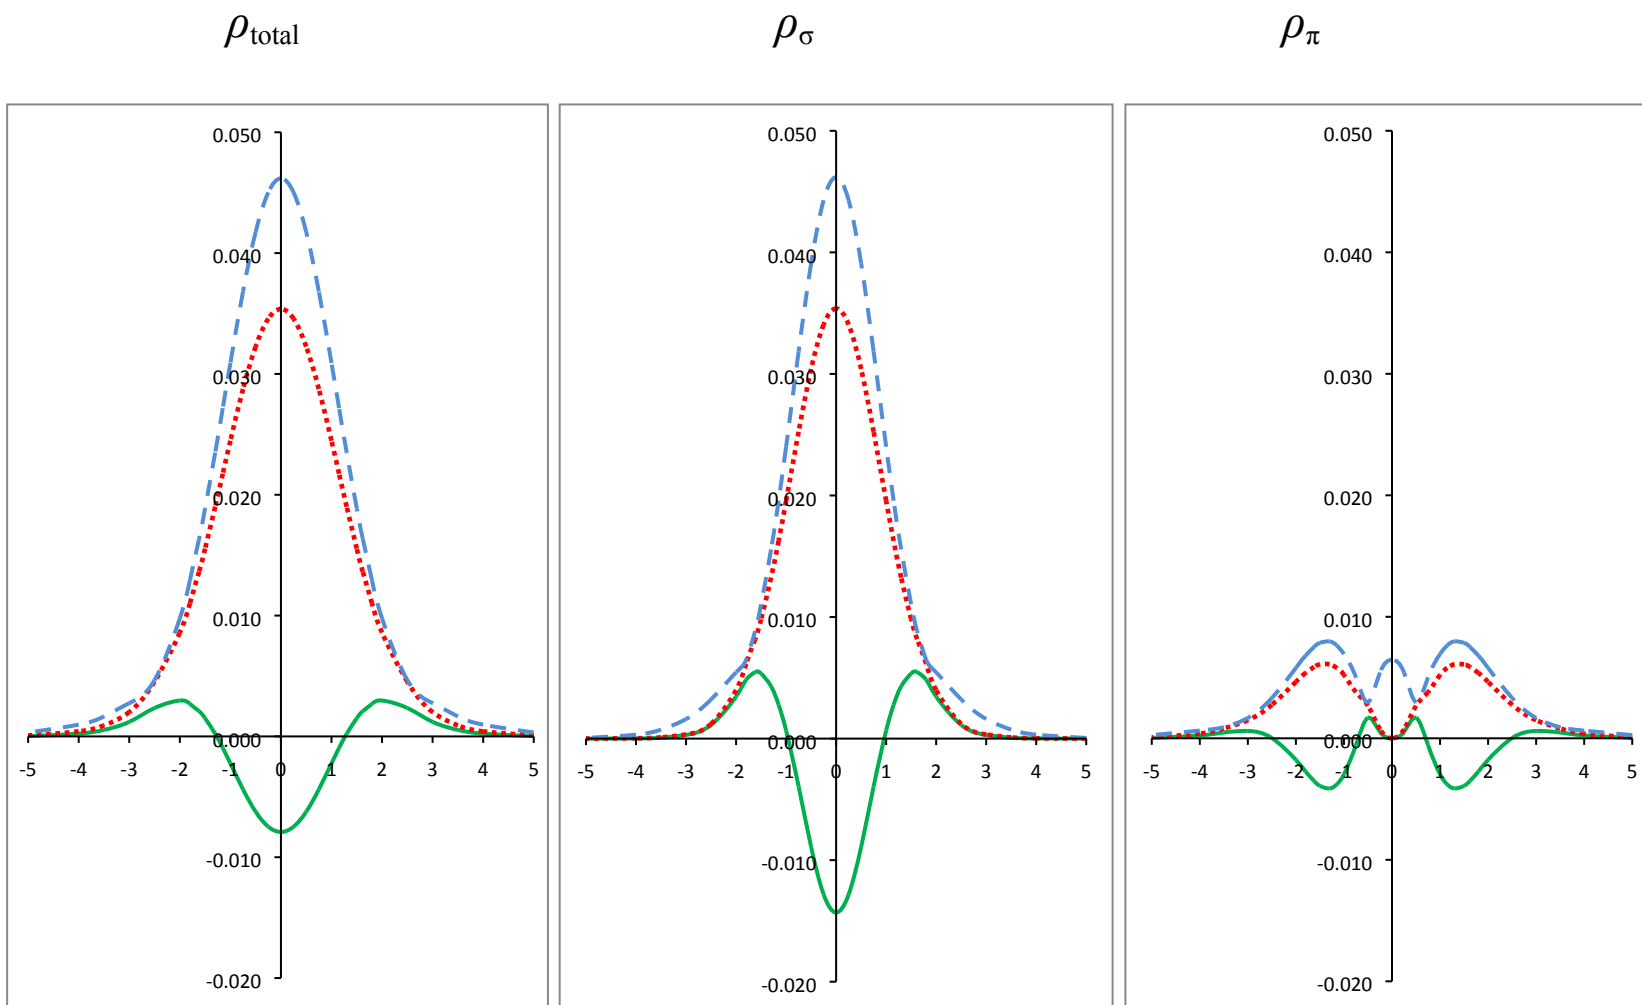

**F2 (continued).** The plot of Hessian's eigenvalues of  $\rho_{total}$ ,  $\rho_{\sigma}$  and  $\rho_{\pi}$  versus distance (horizontal axis) from the ring center of  $C_5H_5SiH$ .

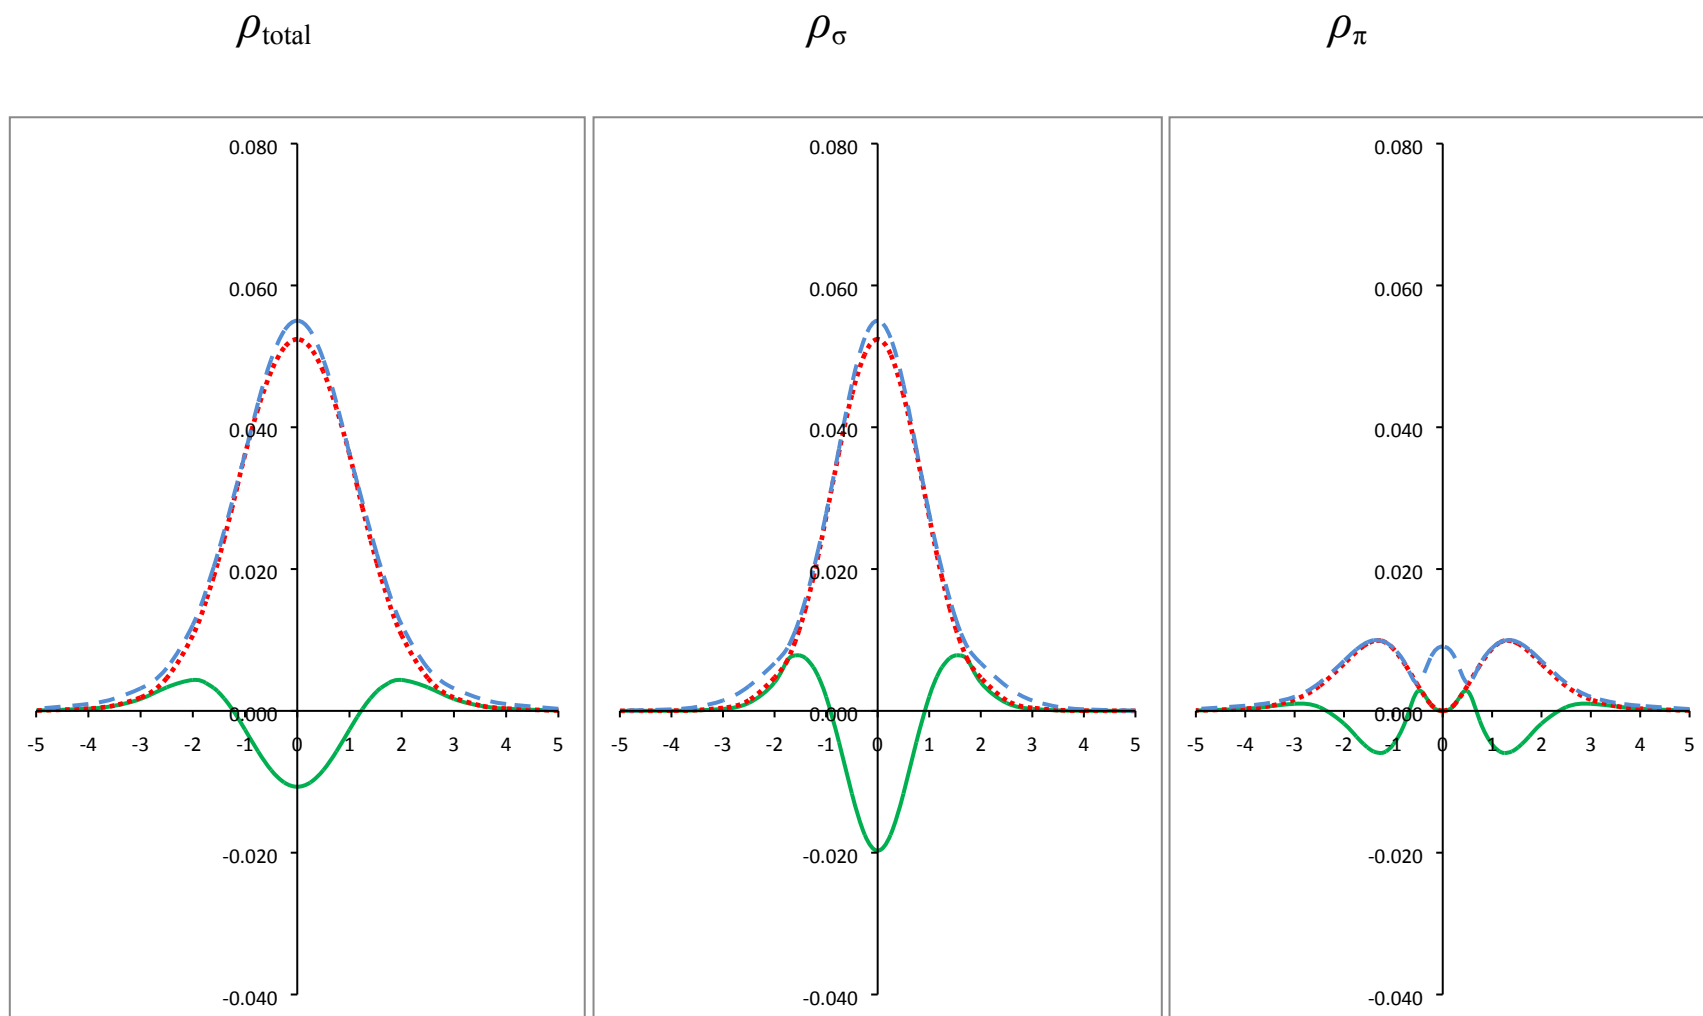

**F2 (continued).** The plot of Hessian's eigenvalues of  $\rho_{total}$ ,  $\rho_{\sigma}$  and  $\rho_{\pi}$  versus distance (horizontal axis) from the ring center of  $C_5H_5N$ .

$\rho_{total}$

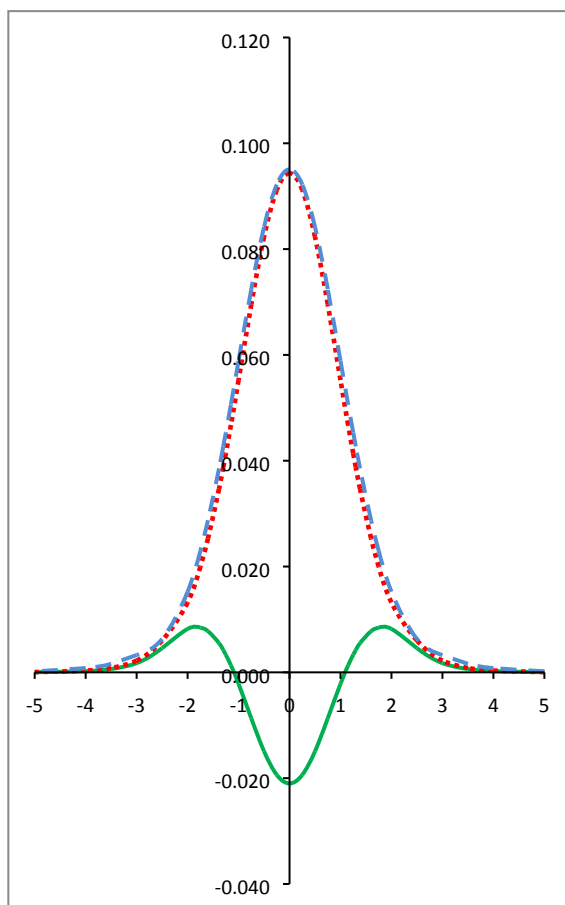

$\rho_{\sigma}$

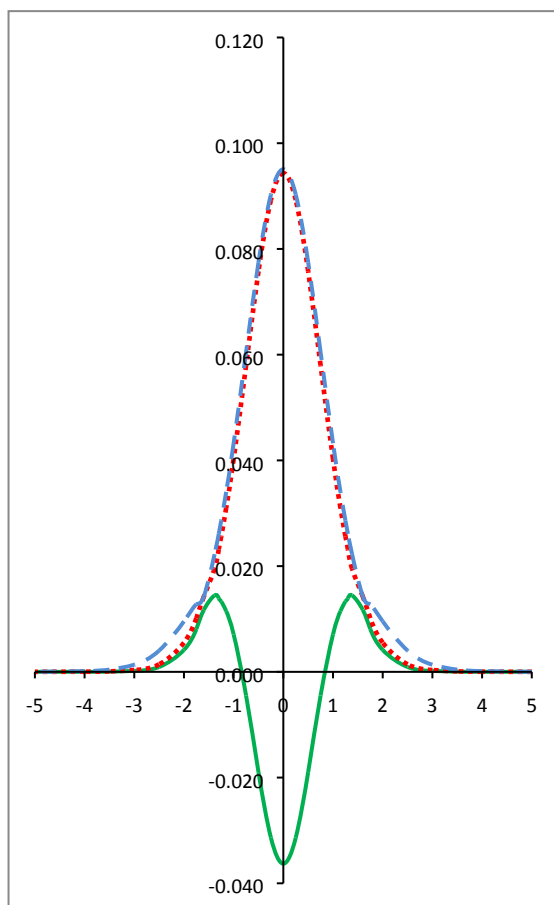

$\rho_{\pi}$

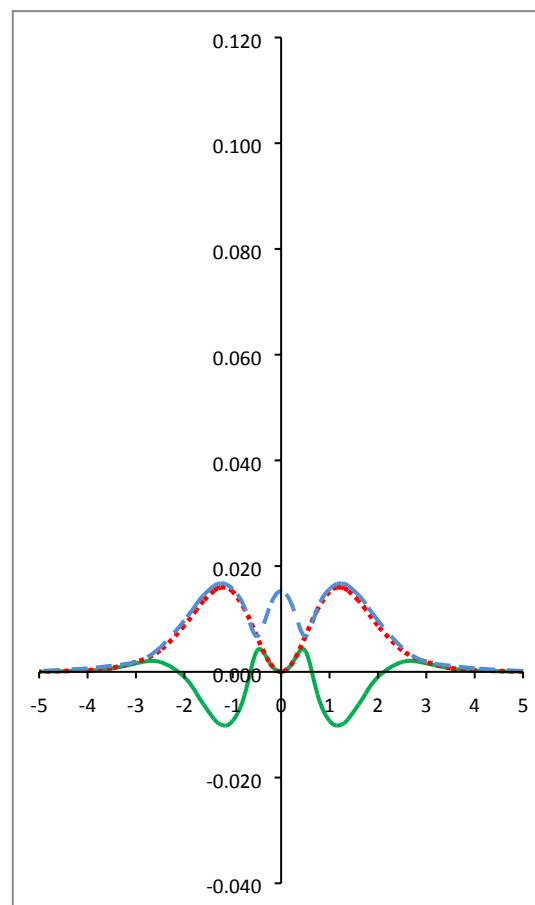

**F2 (continued).** The plot of Hessian's eigenvalues of  $\rho_{total}$ ,  $\rho_{\sigma}$  and  $\rho_{\pi}$  versus distance (horizontal axis) from the ring center of  $C_5H_5NH^+$ .

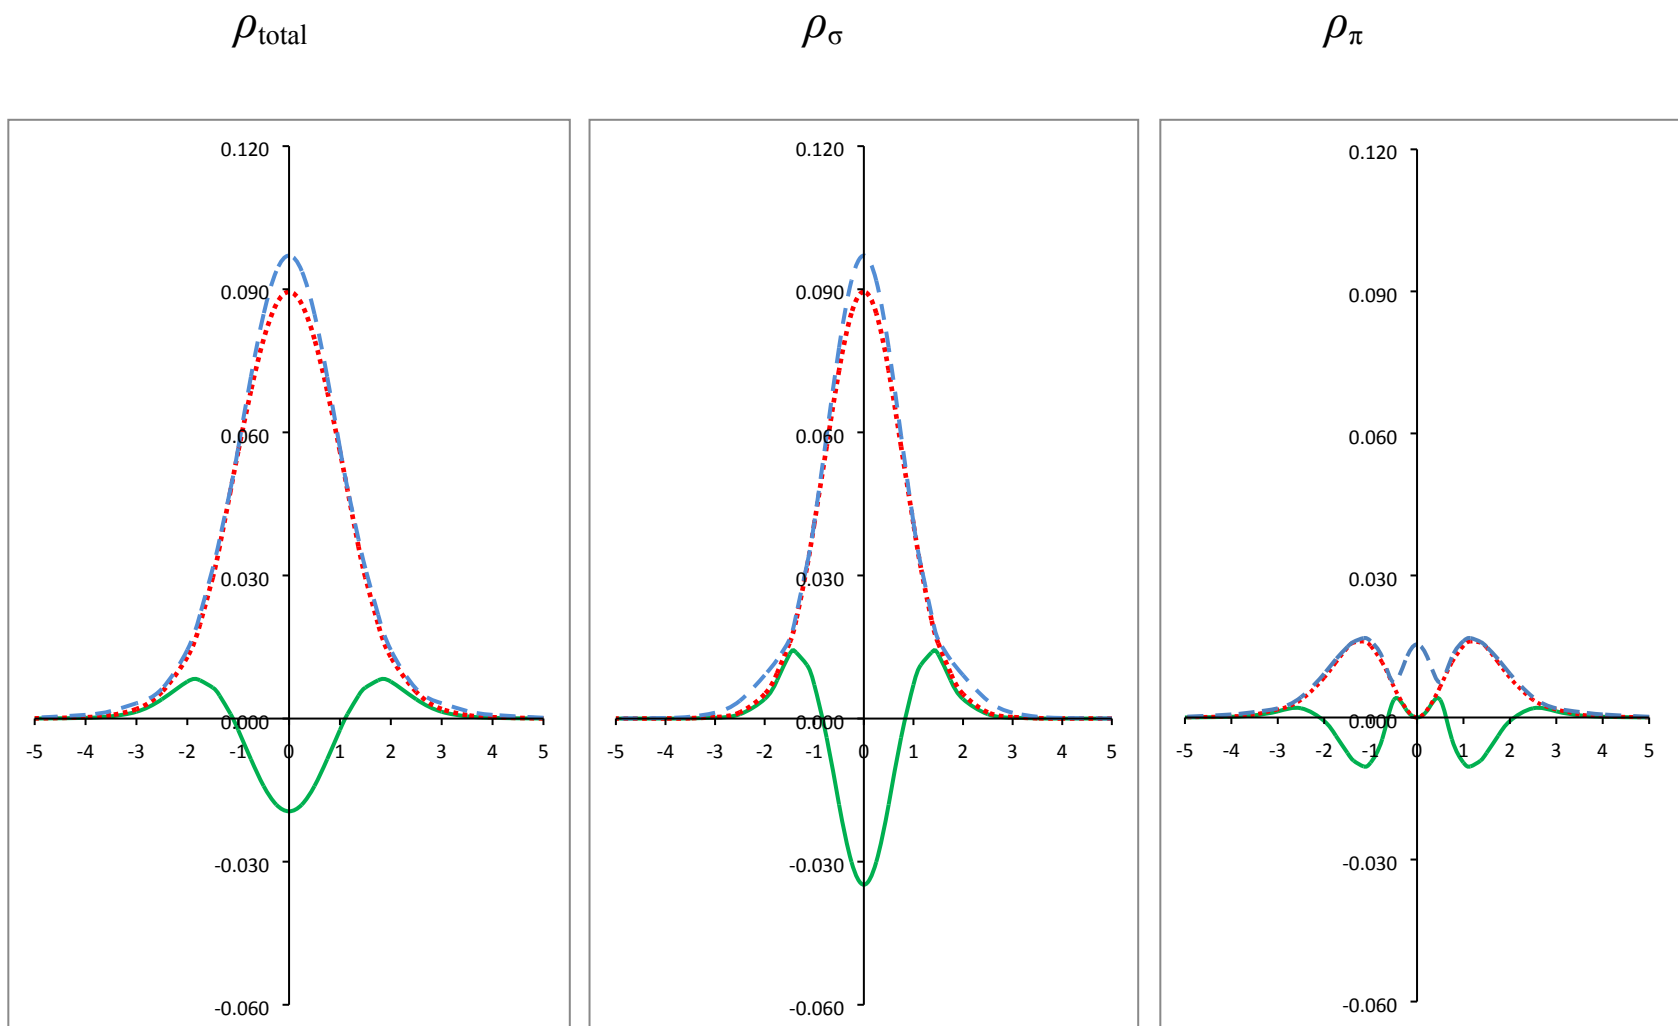

**F2 (continued).** The plot of Hessian's eigenvalues of  $\rho_{total}$ ,  $\rho_{\sigma}$  and  $\rho_{\pi}$  versus distance (horizontal axis) from the ring center of  $C_5H_5P$ .

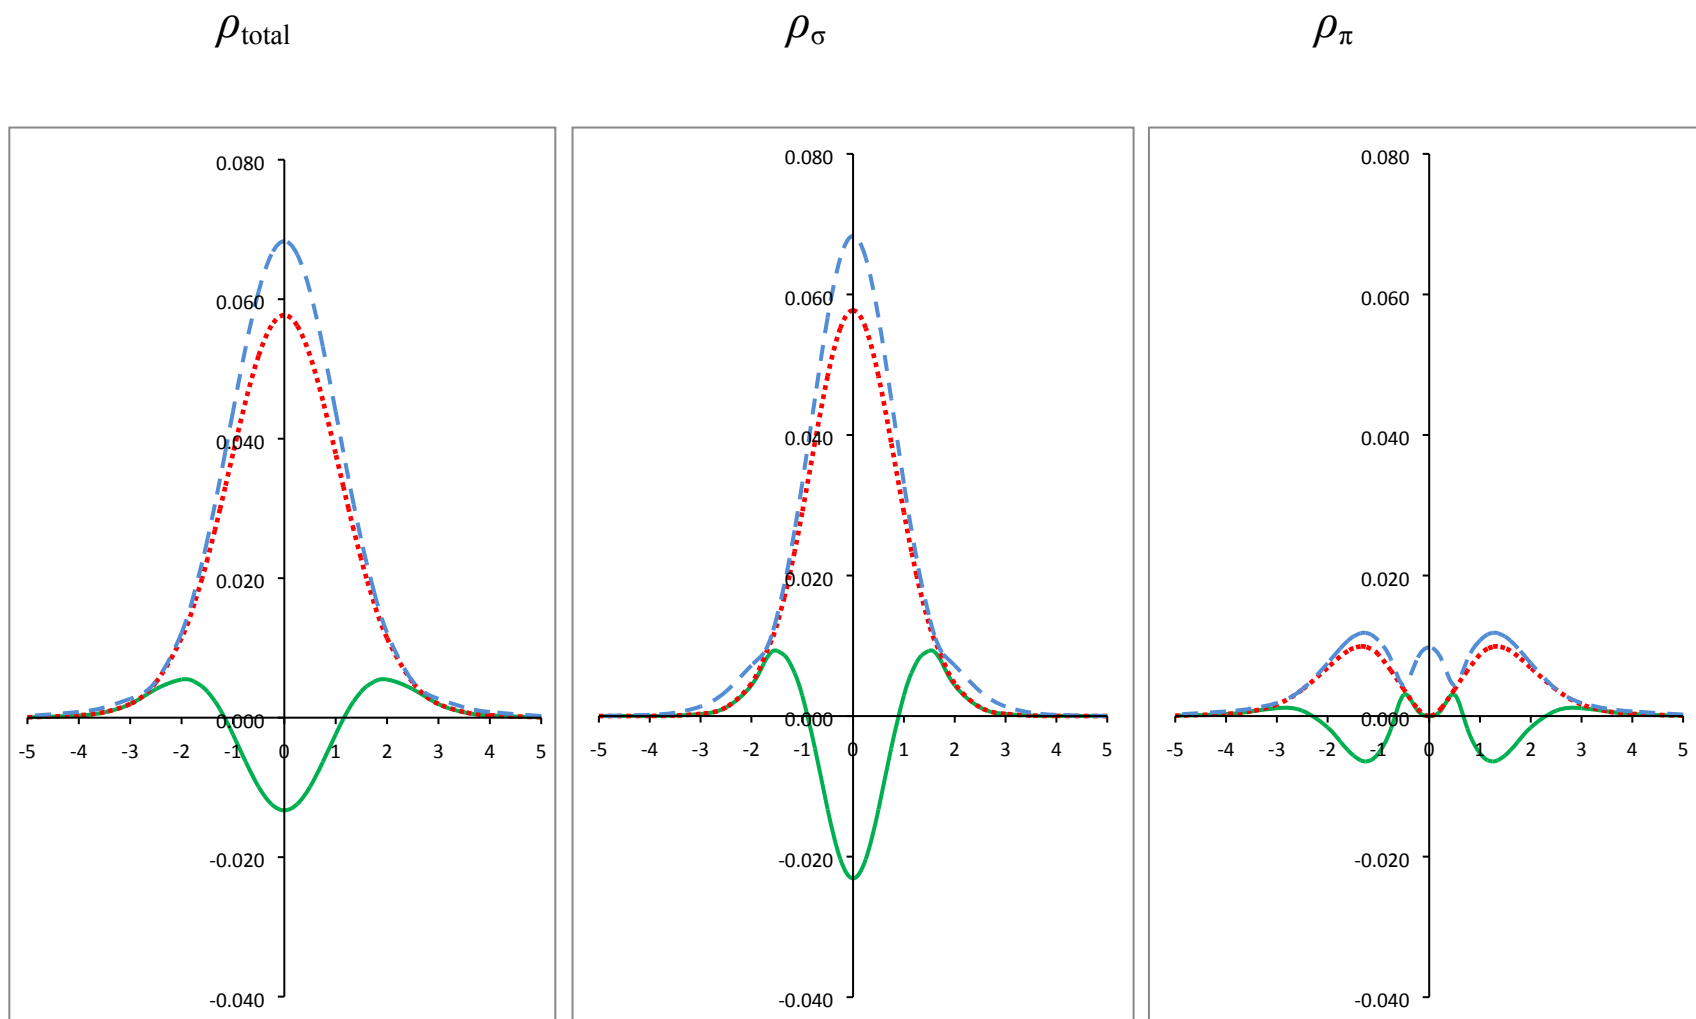

**F2 (continued).** The plot of Hessian's eigenvalues of  $\rho_{total}$ ,  $\rho_{\sigma}$  and  $\rho_{\pi}$  versus distance (horizontal axis) from the ring center of  $C_5H_5O^+$ .

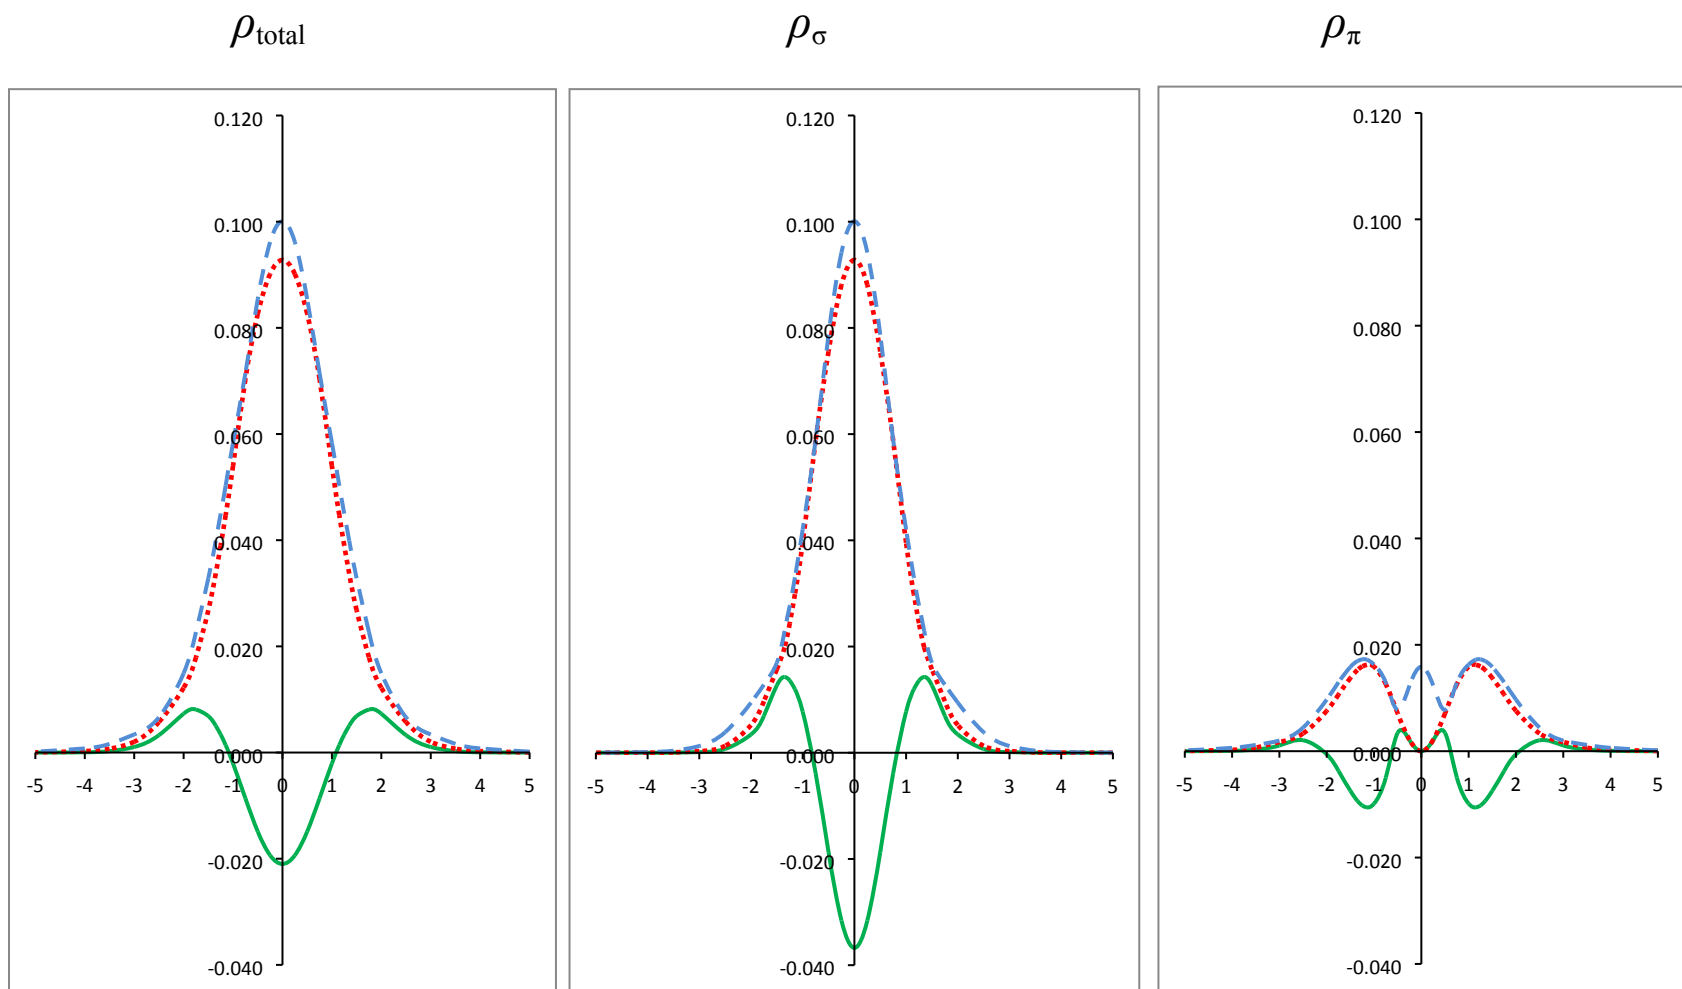

**F2 (continued).** The plot of Hessian's eigenvalues of  $\rho_{total}$ ,  $\rho_{\sigma}$  and  $\rho_{\pi}$  versus distance (horizontal axis) from the ring center of  $C_5H_5S^+$ .

$\rho_{total}$

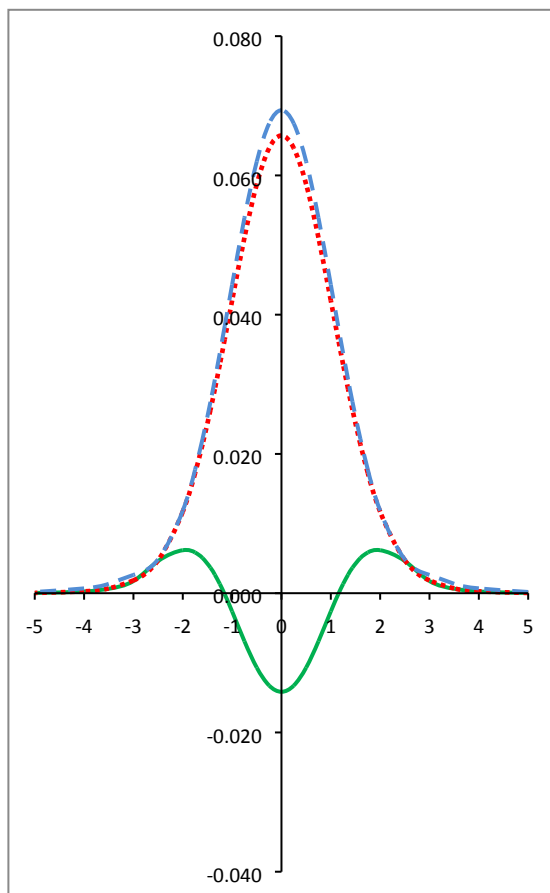

$\rho_{\sigma}$

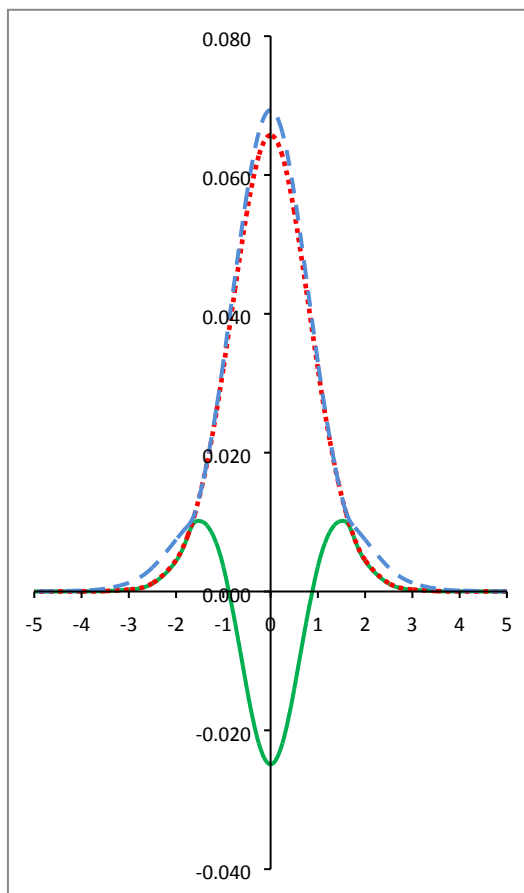

$\rho_{\pi}$

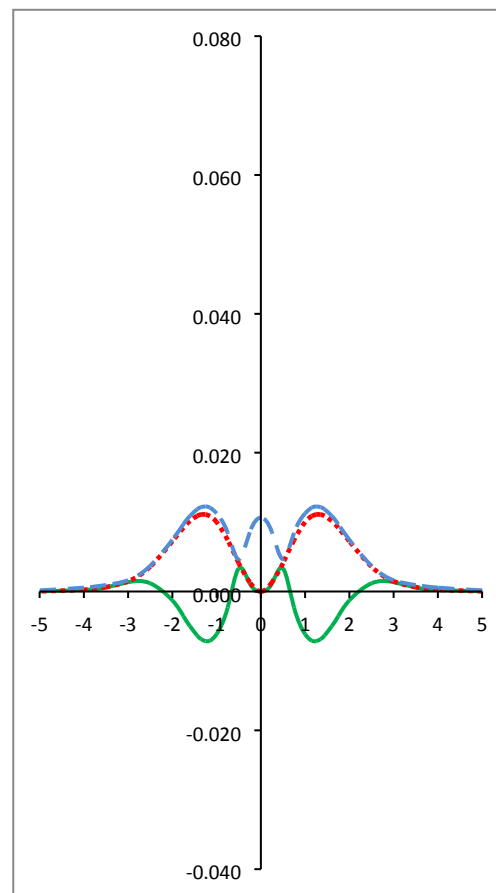

**F2 (continued).** The plot of Hessian's eigenvalues of  $\rho_{total}$ ,  $\rho_{\sigma}$  and  $\rho_{\pi}$  versus distance (horizontal axis) from the ring center of  $C_6H_6BH$ .

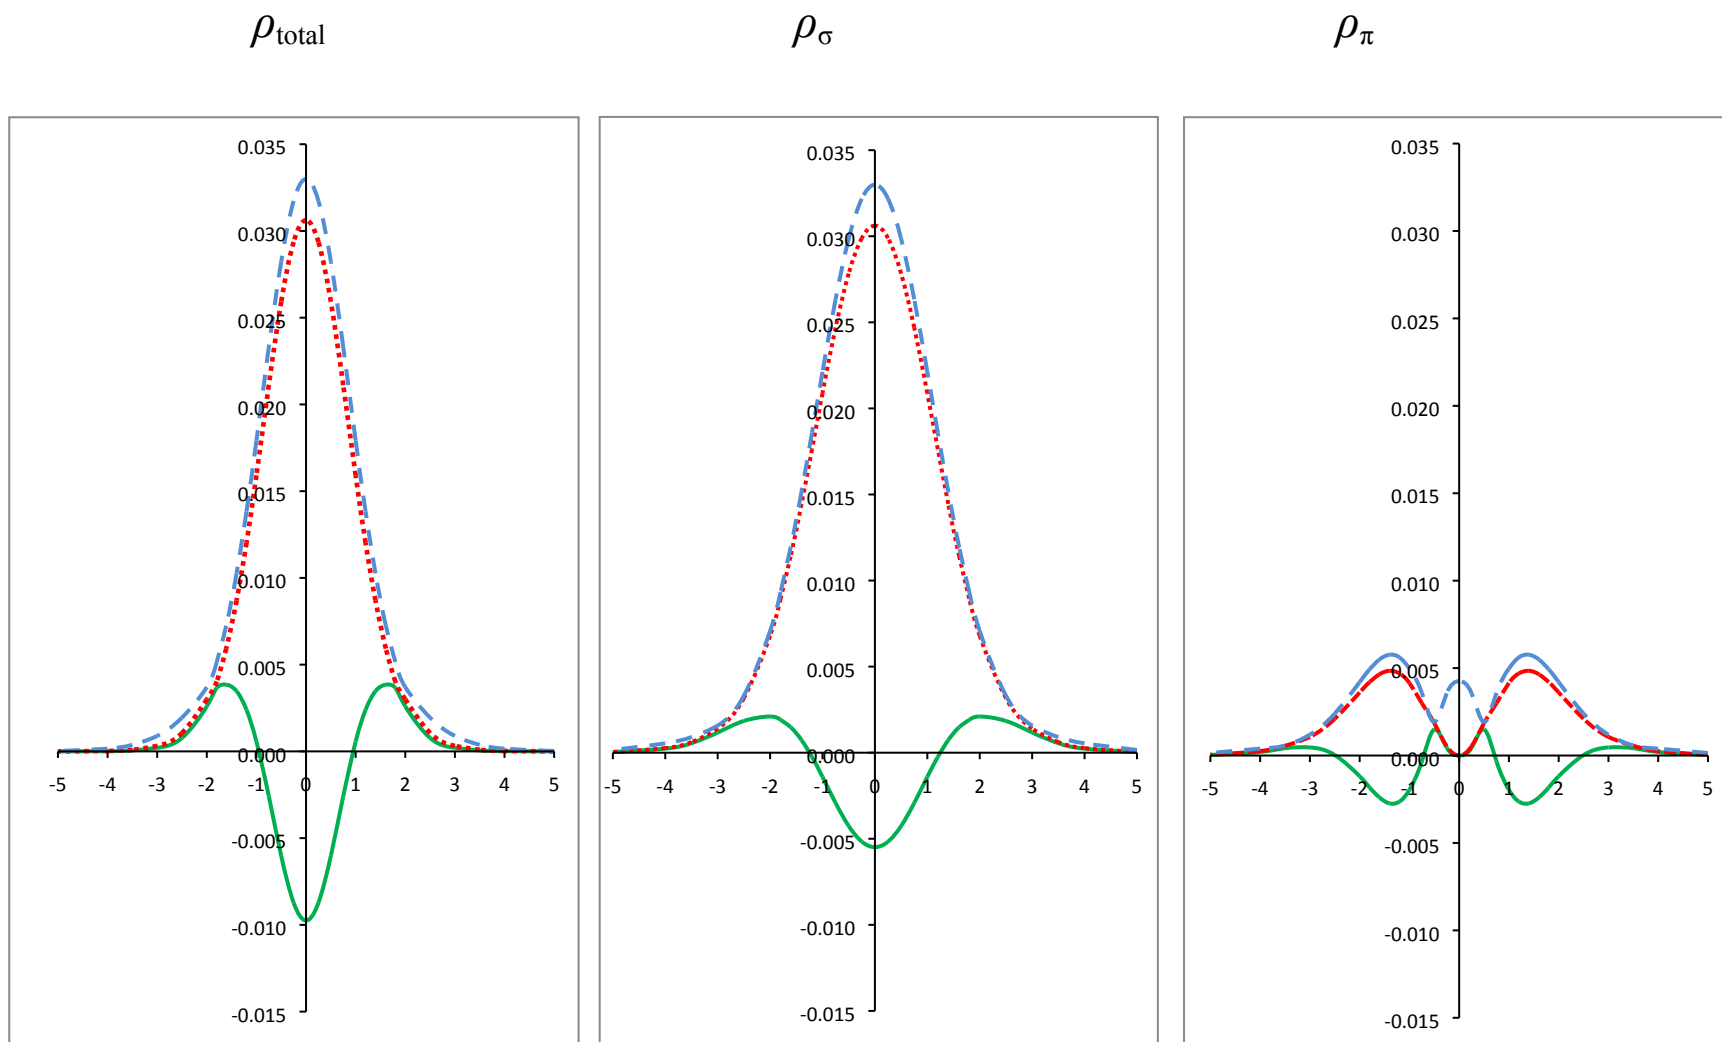



**F2 (continued).** The plot of Hessian's eigenvalues of  $\rho_{total}$ ,  $\rho_{\sigma}$  and  $\rho_{\pi}$  versus distance (horizontal axis) from the ring center of  $C_6H_6AlH$ .

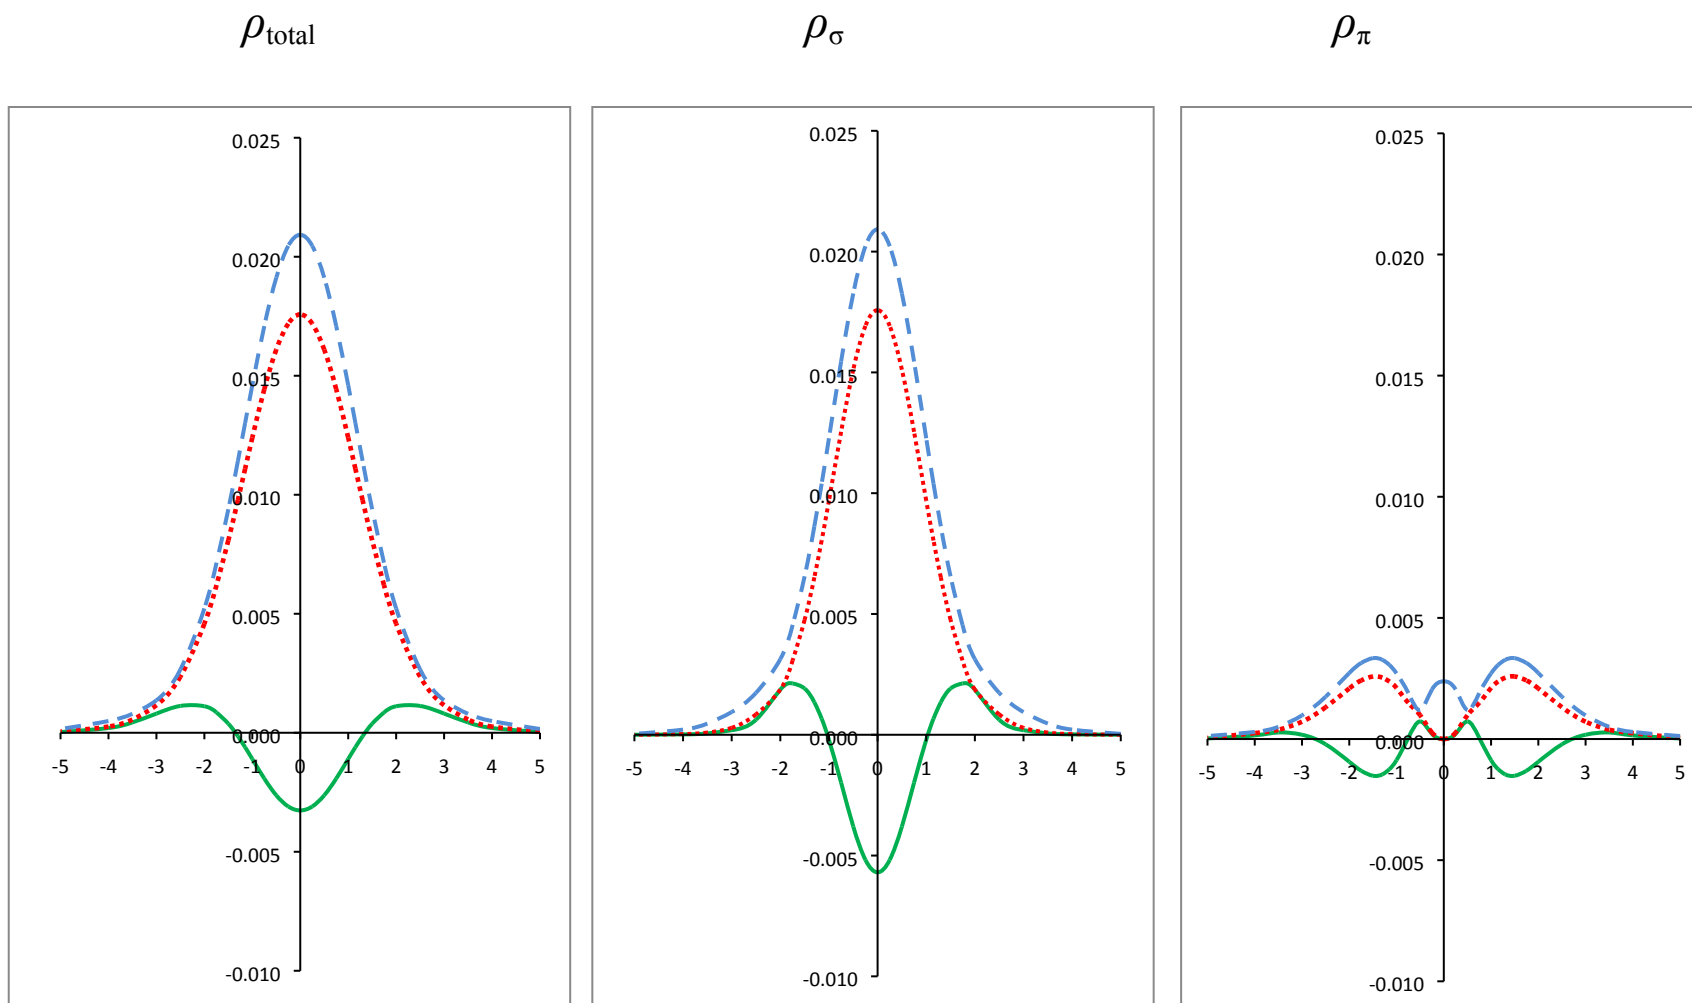

**F2 (continued).** The plot of Hessian's eigenvalues of  $\rho_{total}$ ,  $\rho_{\sigma}$  and  $\rho_{\pi}$  versus distance (horizontal axis) from the ring center of  $C_6H_6SiH^+$ .

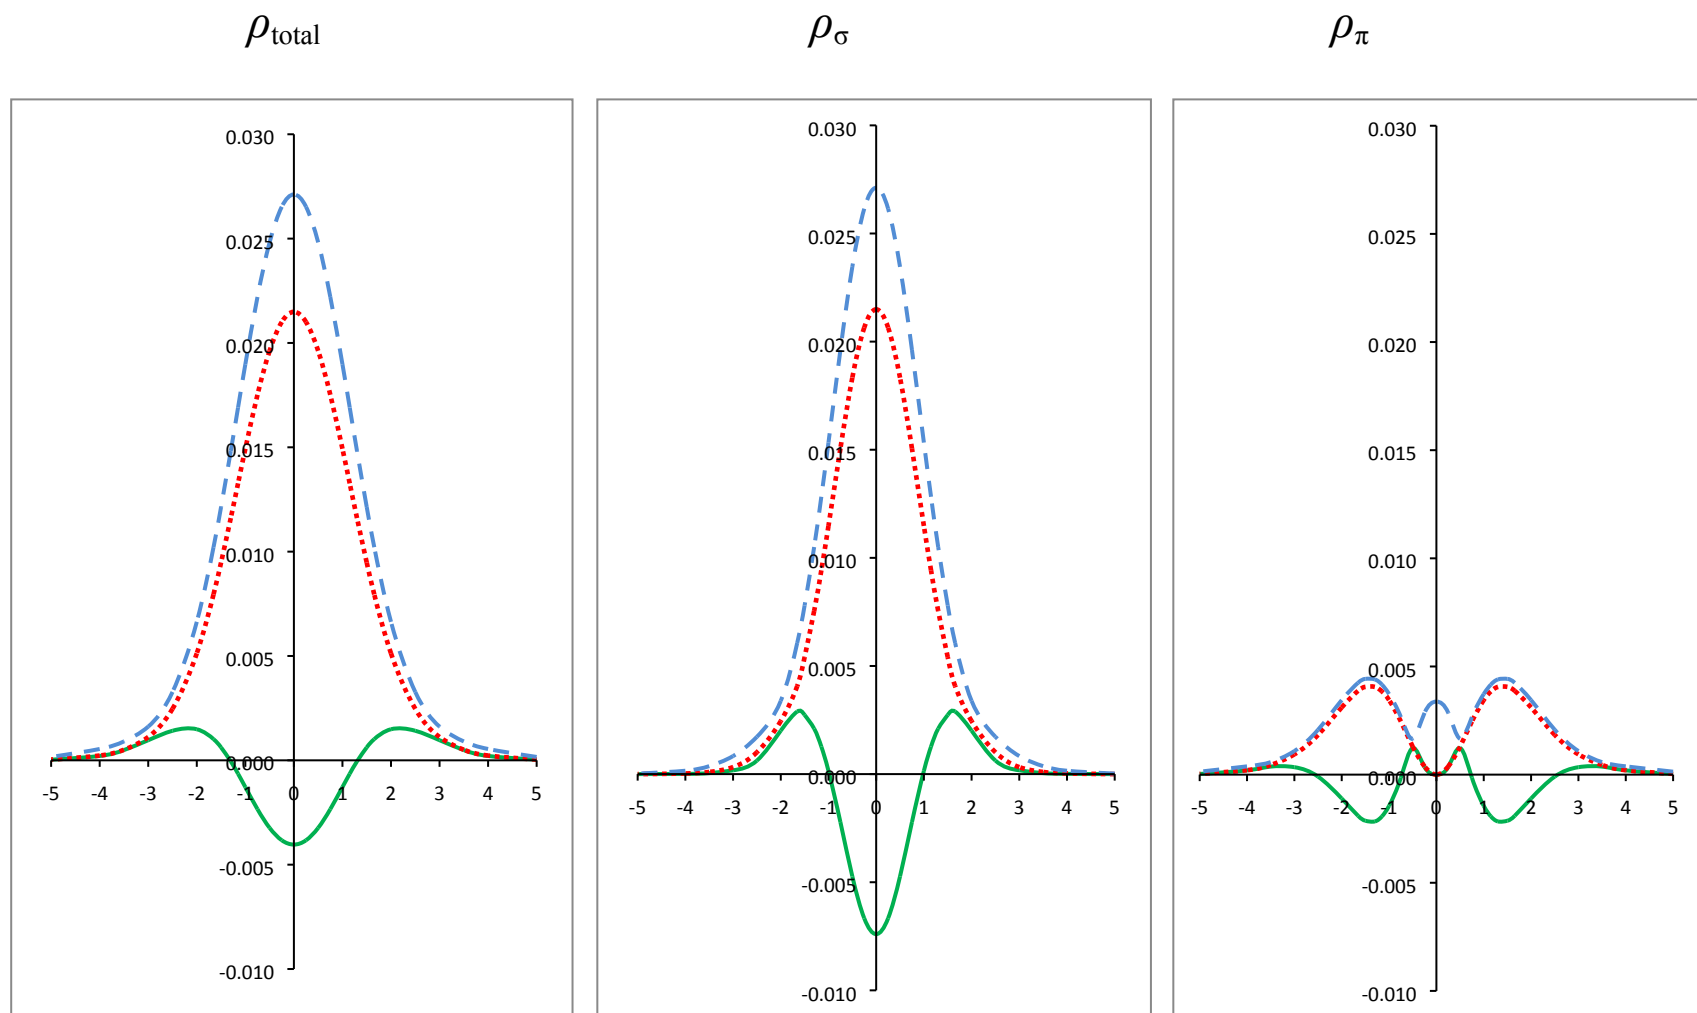

**F2 (continued).** The plot of Hessian's eigenvalues of  $\rho_{total}$ ,  $\rho_{\sigma}$  and  $\rho_{\pi}$  versus distance (horizontal axis) from the ring center of  $C_6H_6N^+$ .

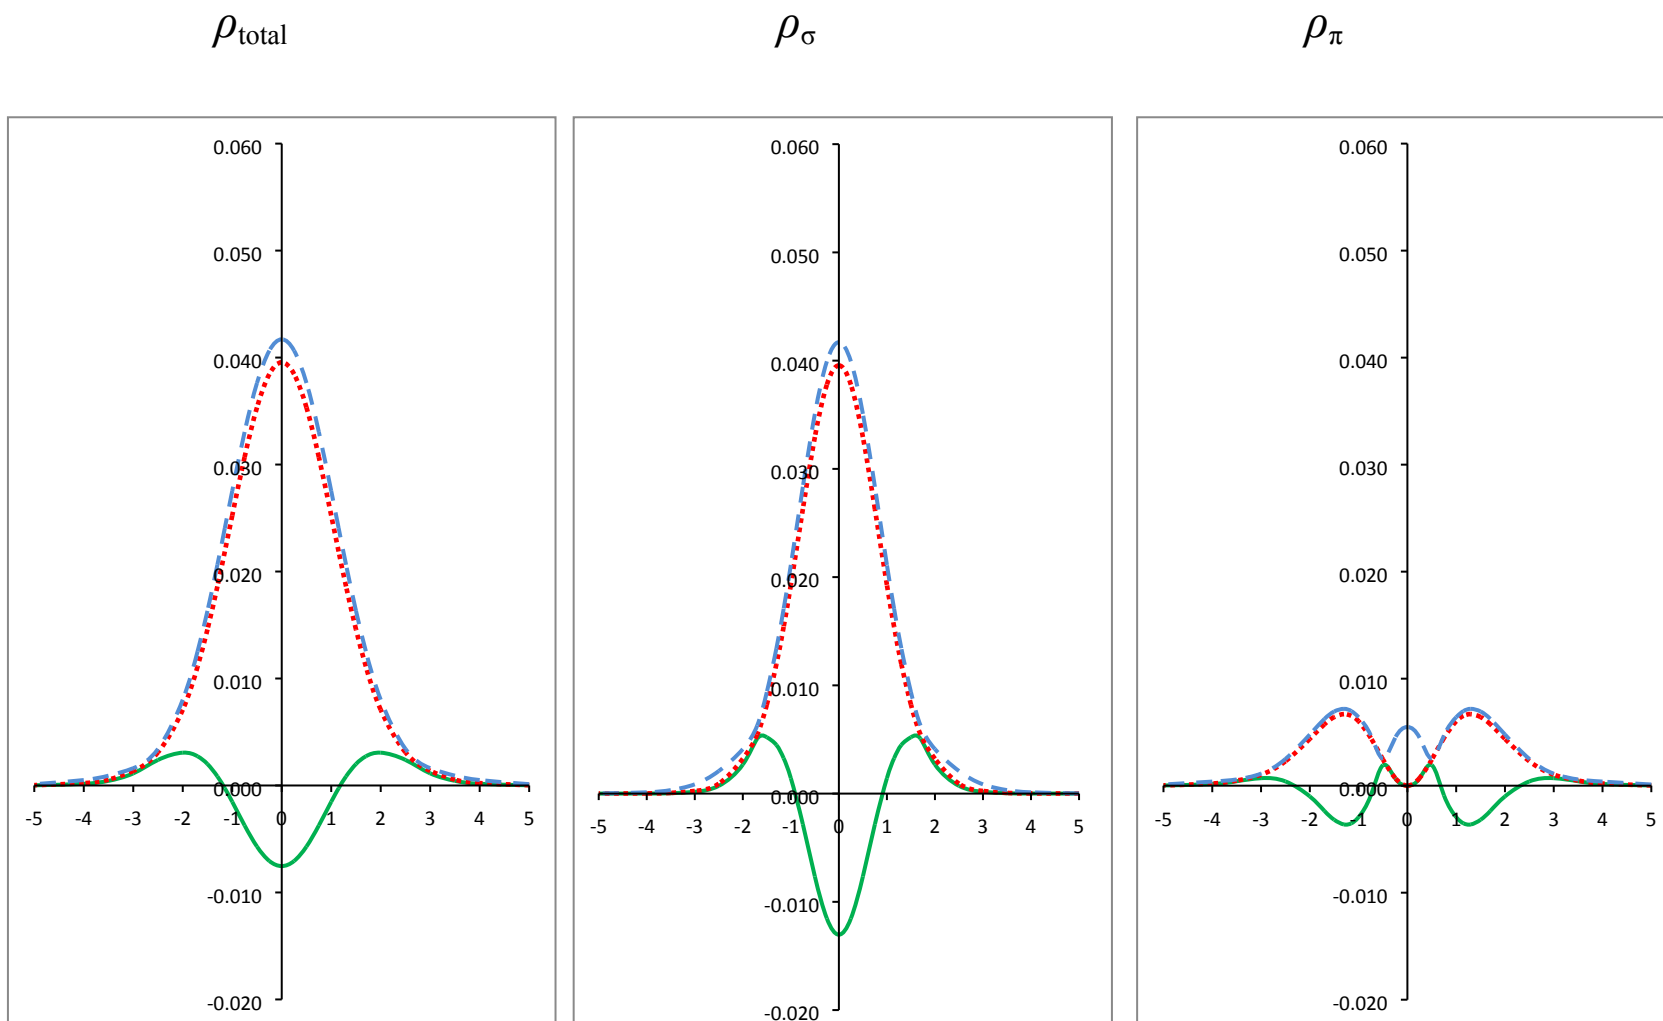

**F2 (continued).** The plot of Hessian's eigenvalues of  $\rho_{total}$ ,  $\rho_{\sigma}$  and  $\rho_{\pi}$  versus distance (horizontal axis) from the ring center of  $C_6H_6NH$ .

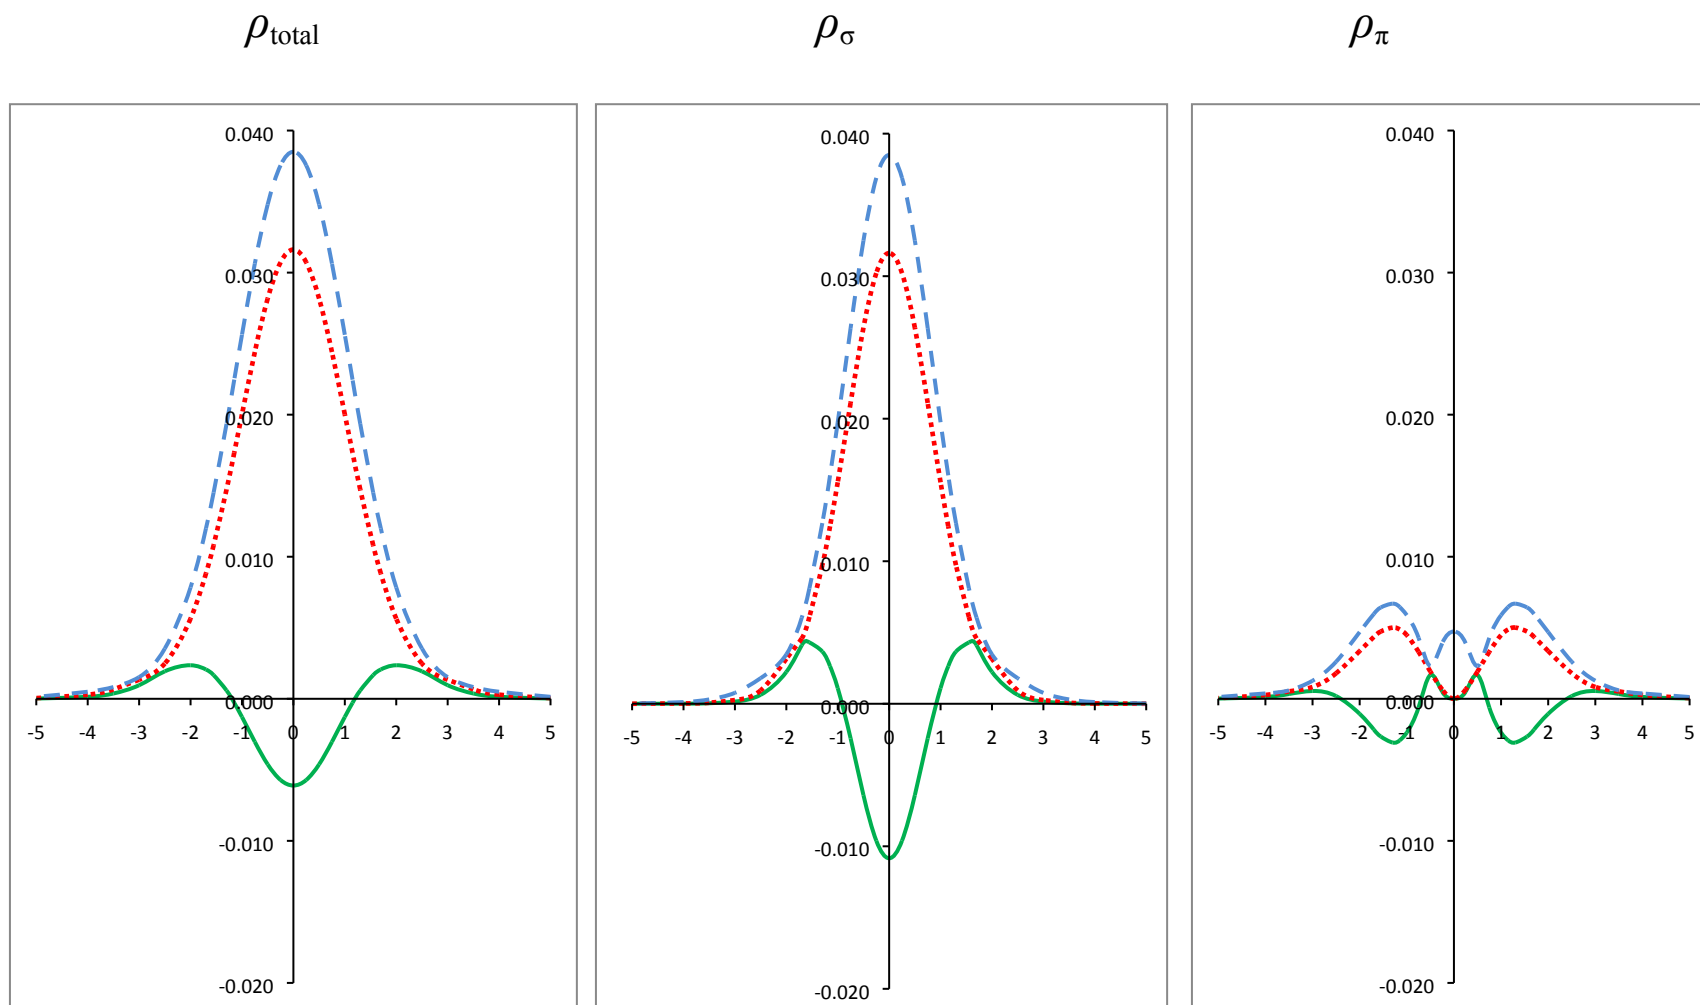

**F2 (continued).** The plot of Hessian's eigenvalues of  $\rho_{total}$ ,  $\rho_{\sigma}$  and  $\rho_{\pi}$  versus distance (horizontal axis) from the ring center of  $C_6H_6P^+$ .

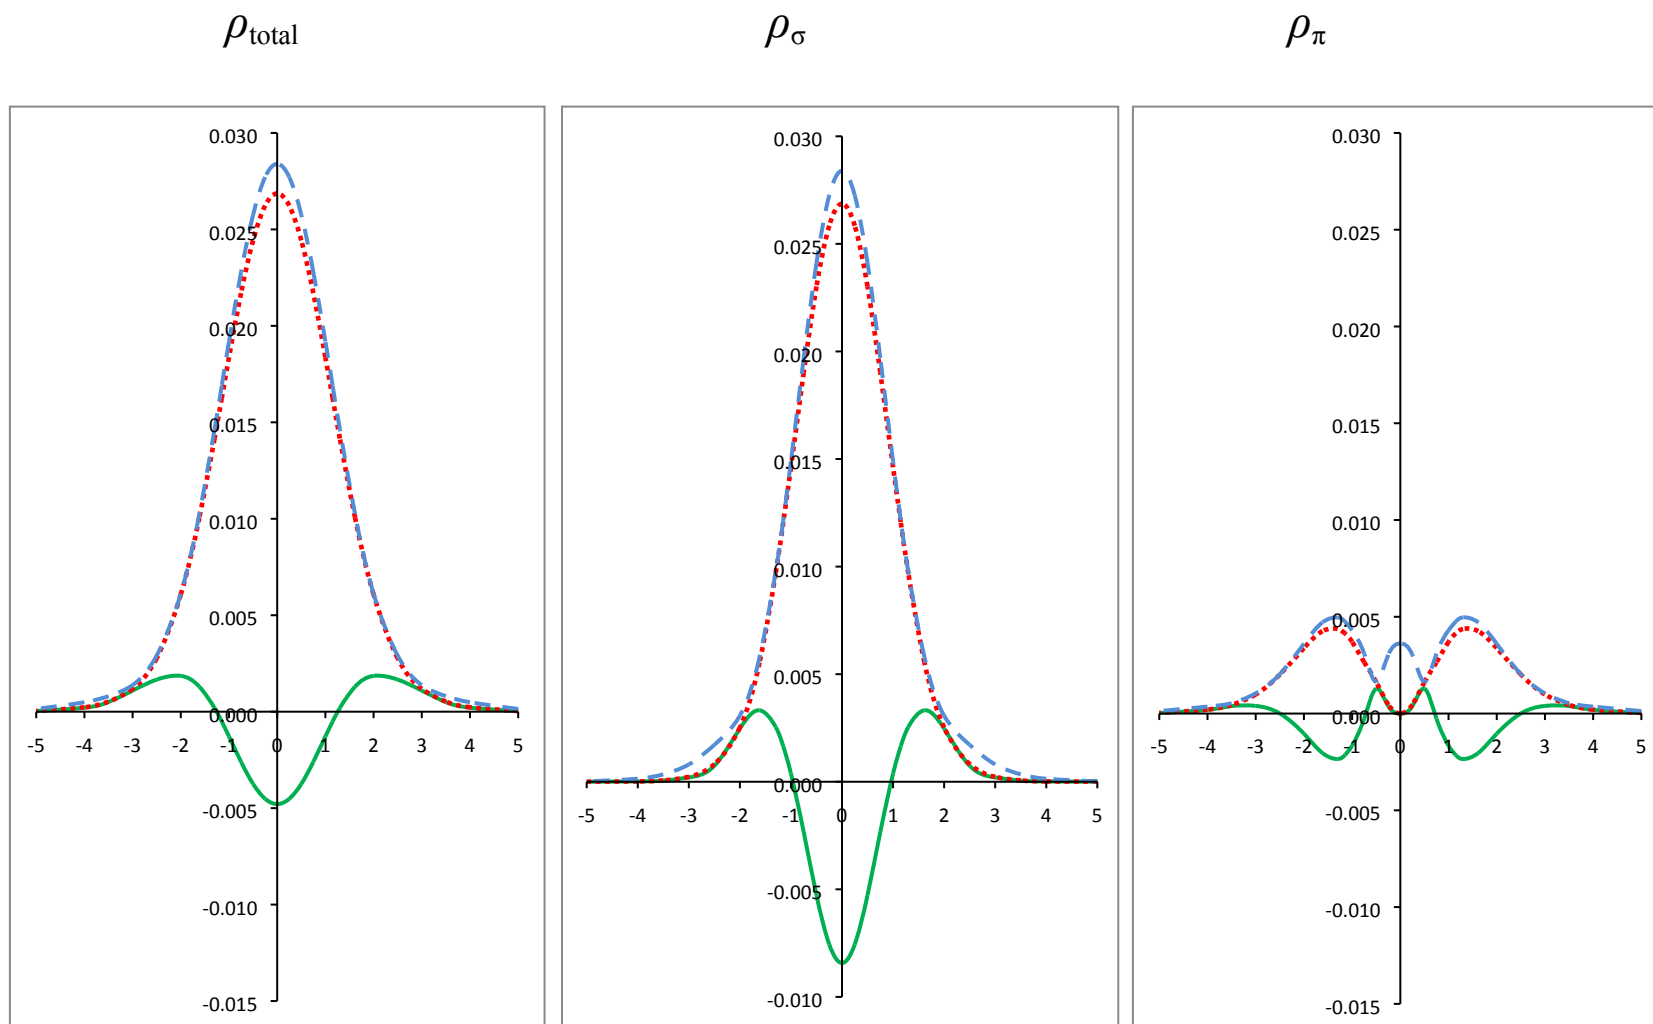

**F2 (continued).** The plot of Hessian's eigenvalues of  $\rho_{total}$ ,  $\rho_{\sigma}$  and  $\rho_{\pi}$  versus distance (horizontal axis) from the ring center of  $C_6H_6O$ .

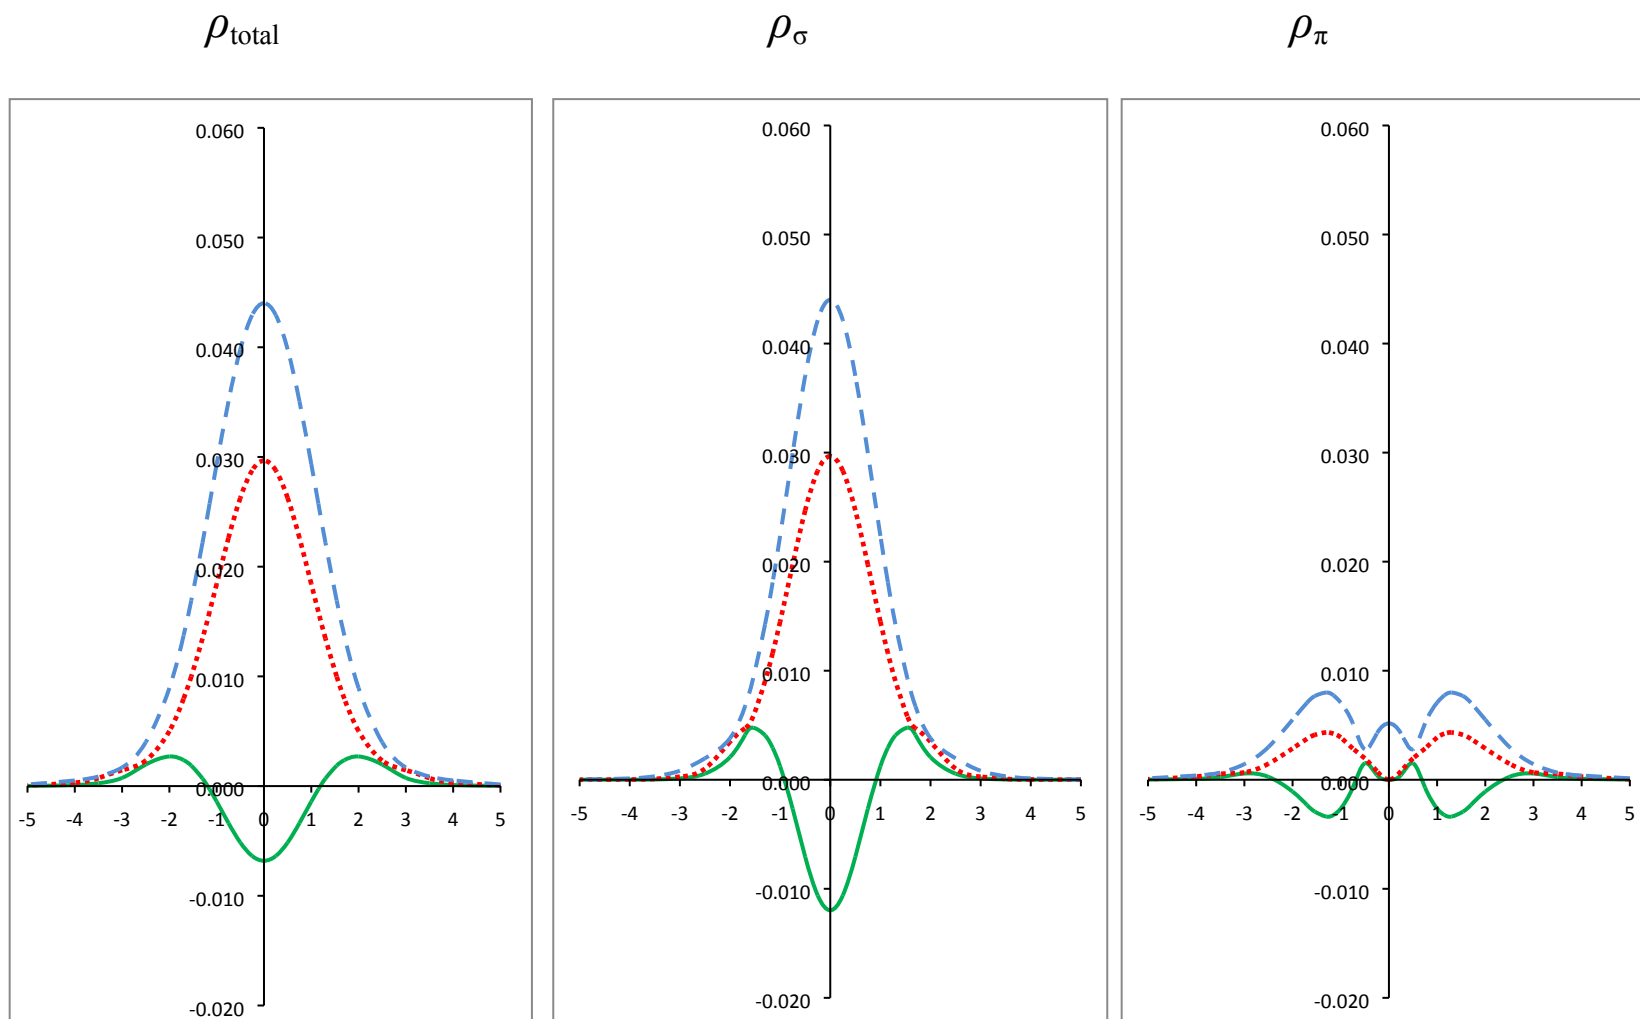

**F2 (continued).** The plot of Hessian's eigenvalues of  $\rho_{total}$ ,  $\rho_{\sigma}$  and  $\rho_{\pi}$  versus distance (horizontal axis) from the ring center of  $C_6H_6S$ .

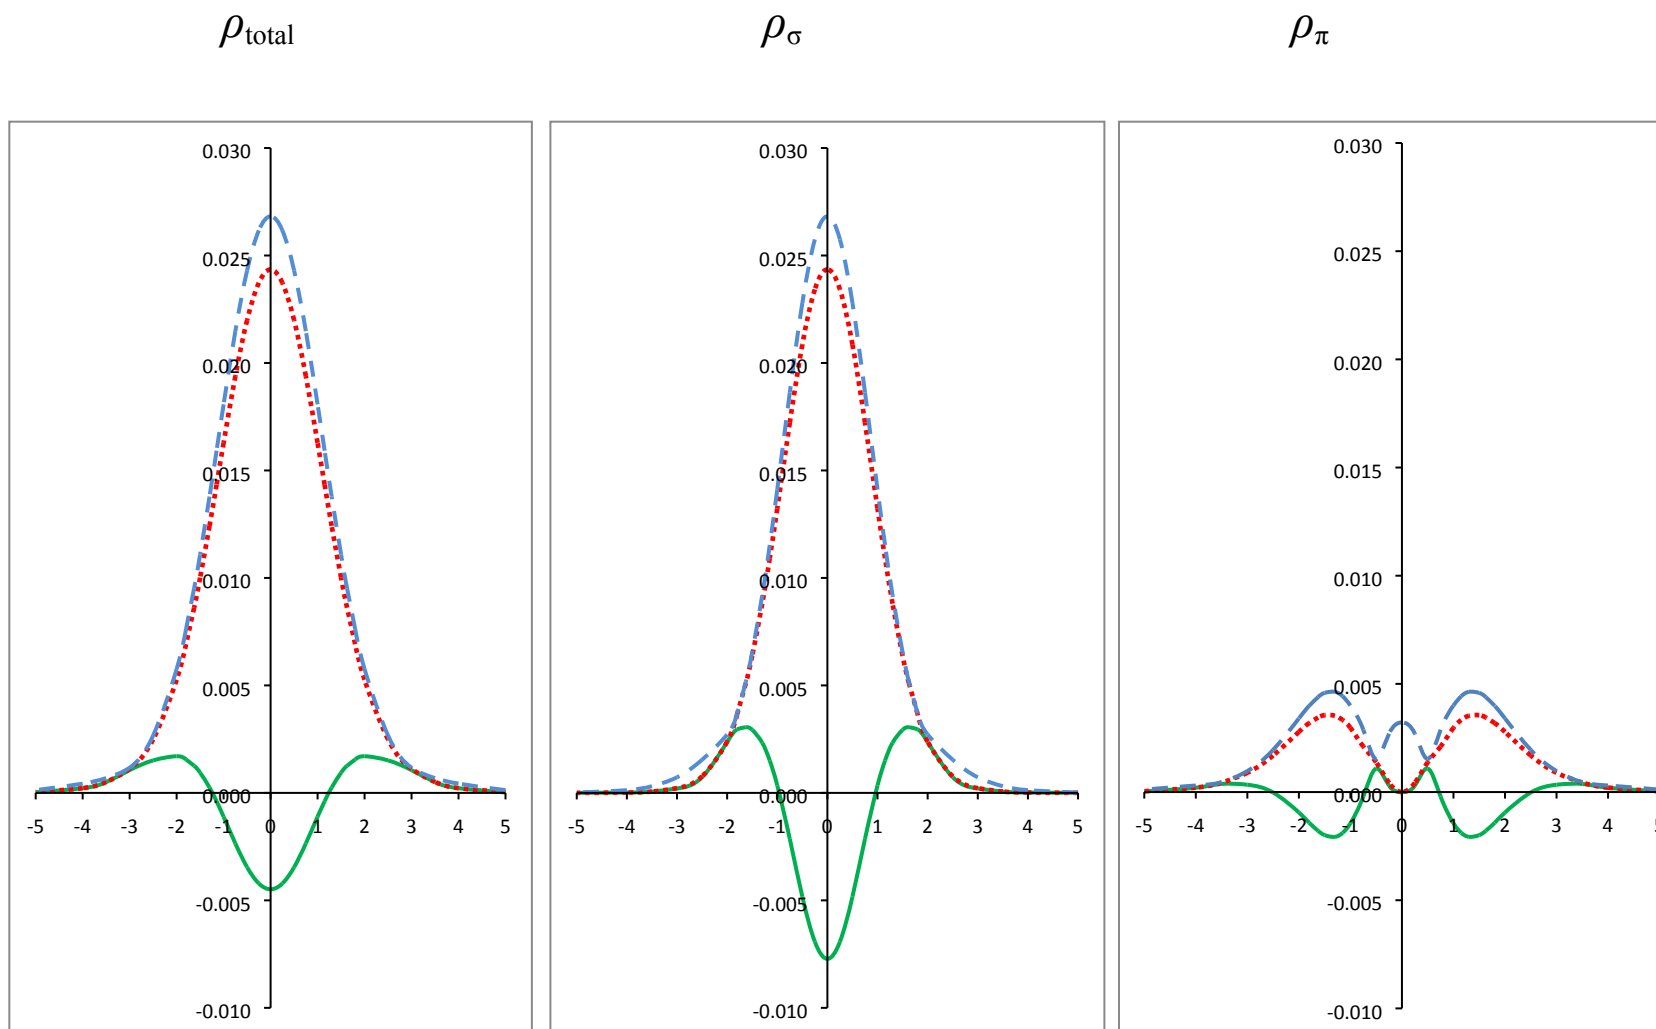

**F2 (continued).** The plot of Hessian's eigenvalues of  $\rho_{total}$ ,  $\rho_{\sigma}$  and  $\rho_{\pi}$  versus distance (horizontal axis) from the ring center of Pyridazine.

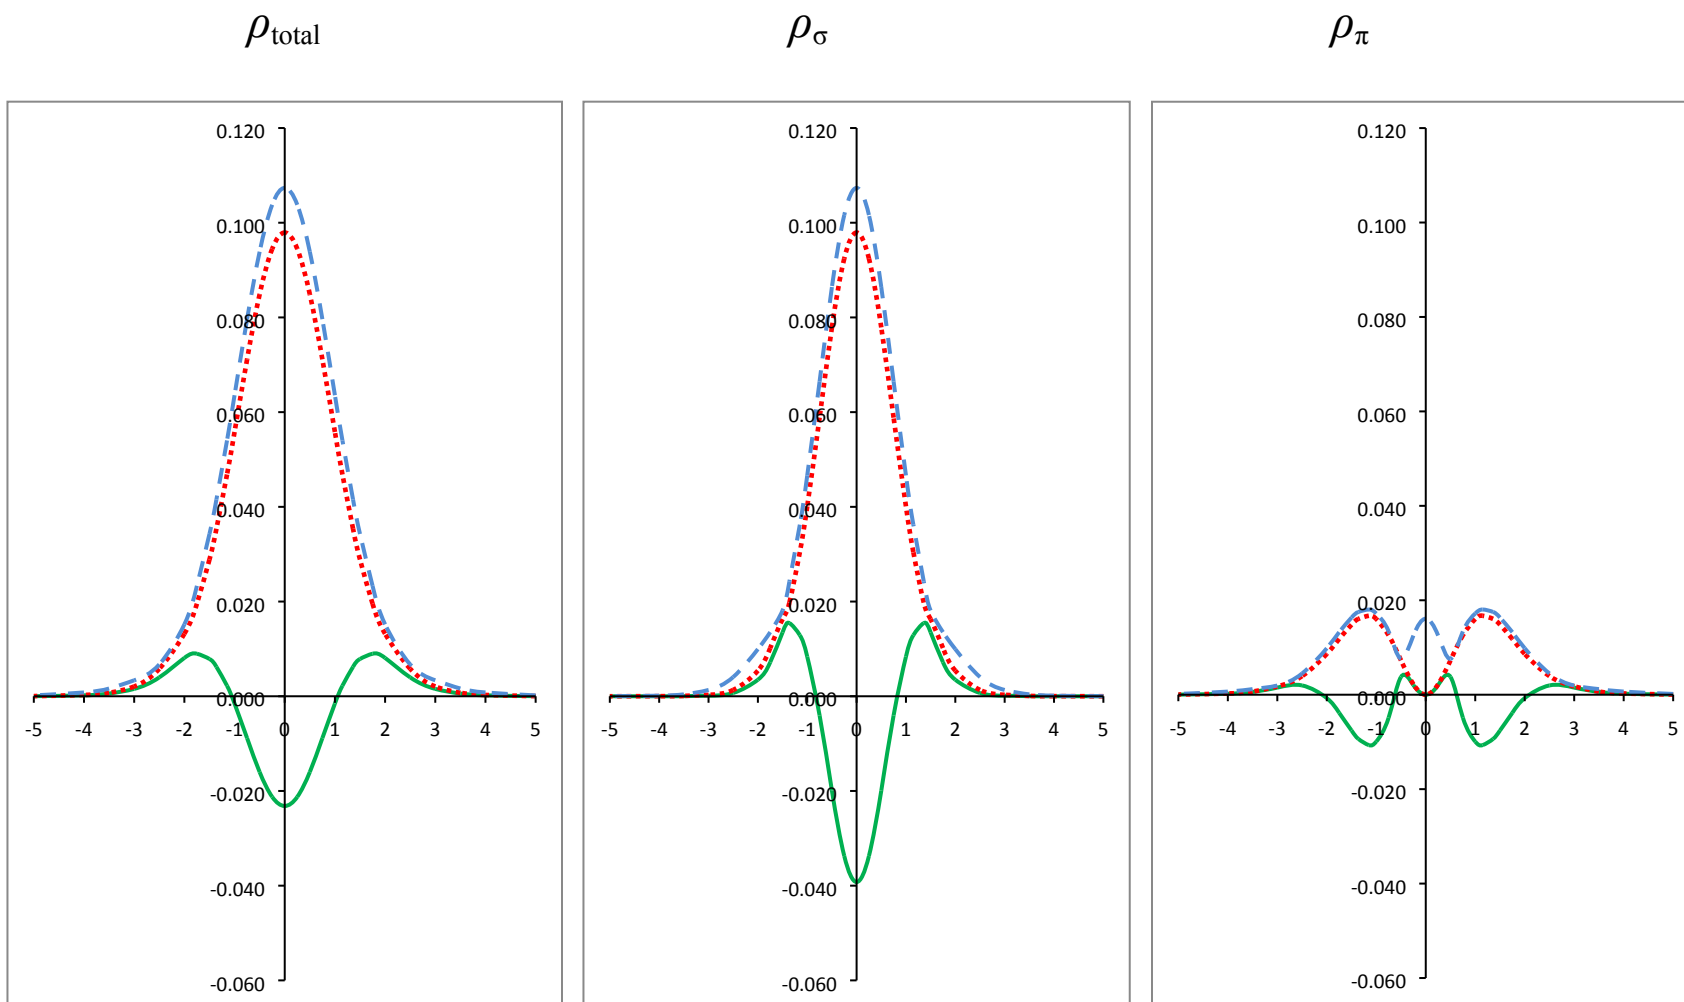



**F2 (continued).** The plot of Hessian's eigenvalues of  $\rho_{total}$ ,  $\rho_{\sigma}$  and  $\rho_{\pi}$  versus distance (horizontal axis) from the ring center of Pyrimidine.

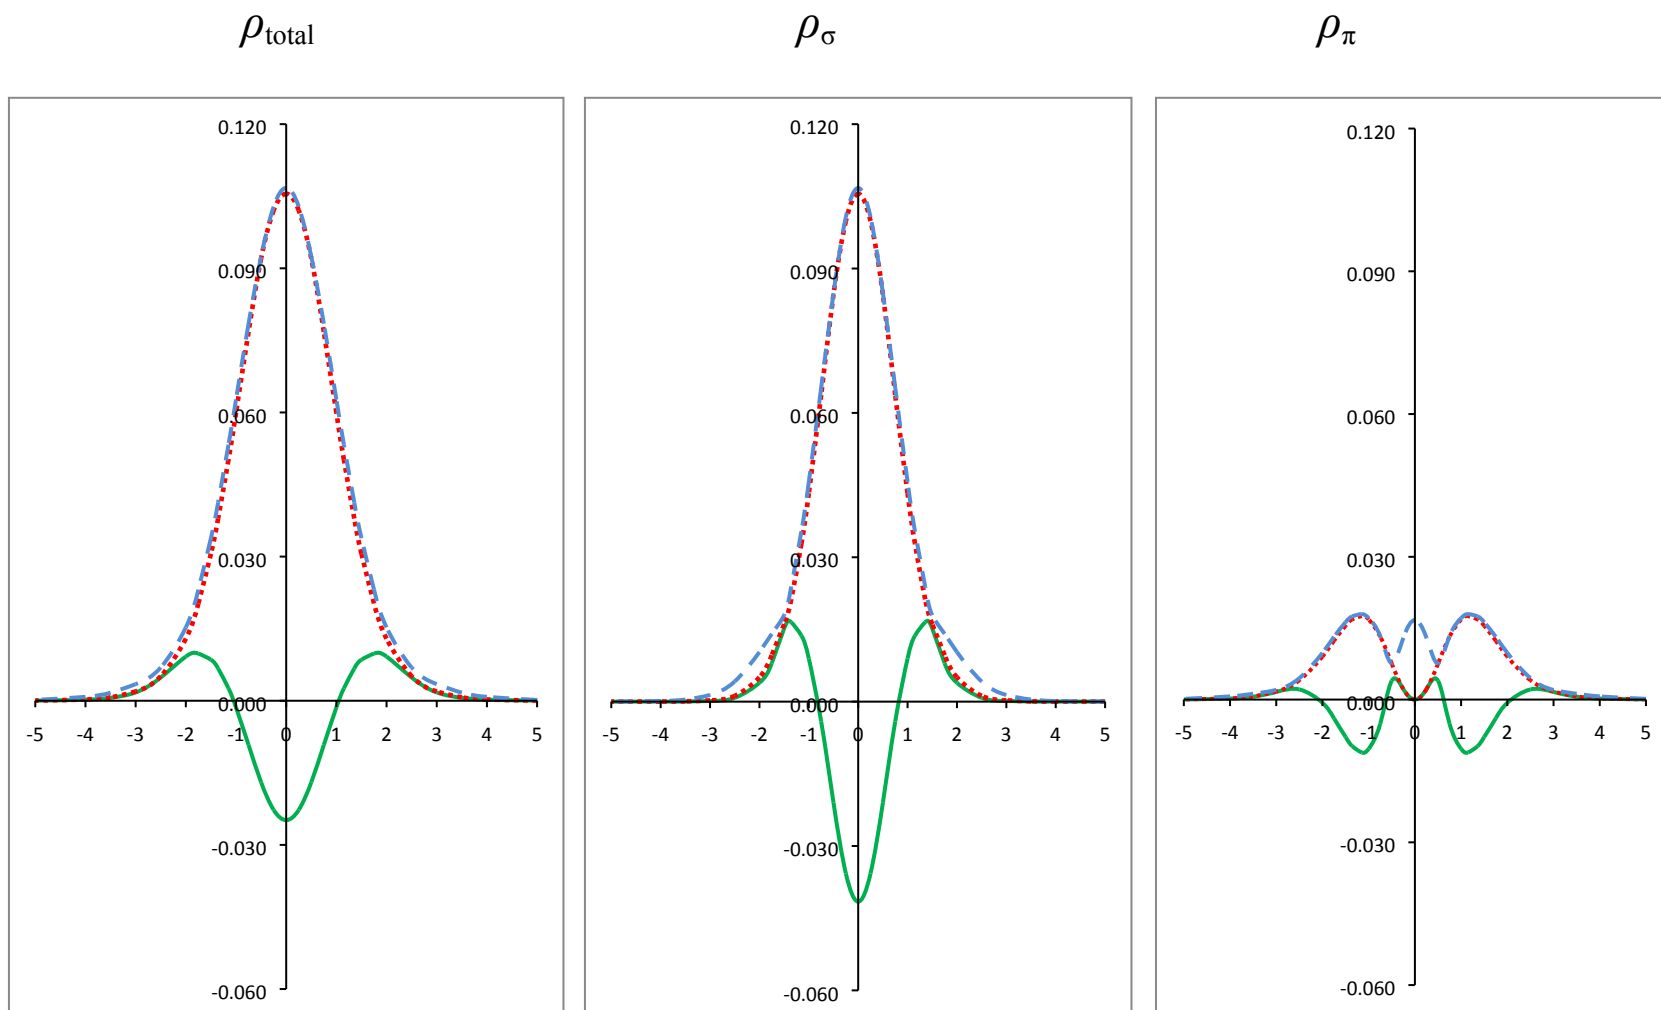

**F2 (continued).** The plot of Hessian's eigenvalues of  $\rho_{total}$ ,  $\rho_{\sigma}$  and  $\rho_{\pi}$  versus distance (horizontal axis) from the ring center of Pyrazine.

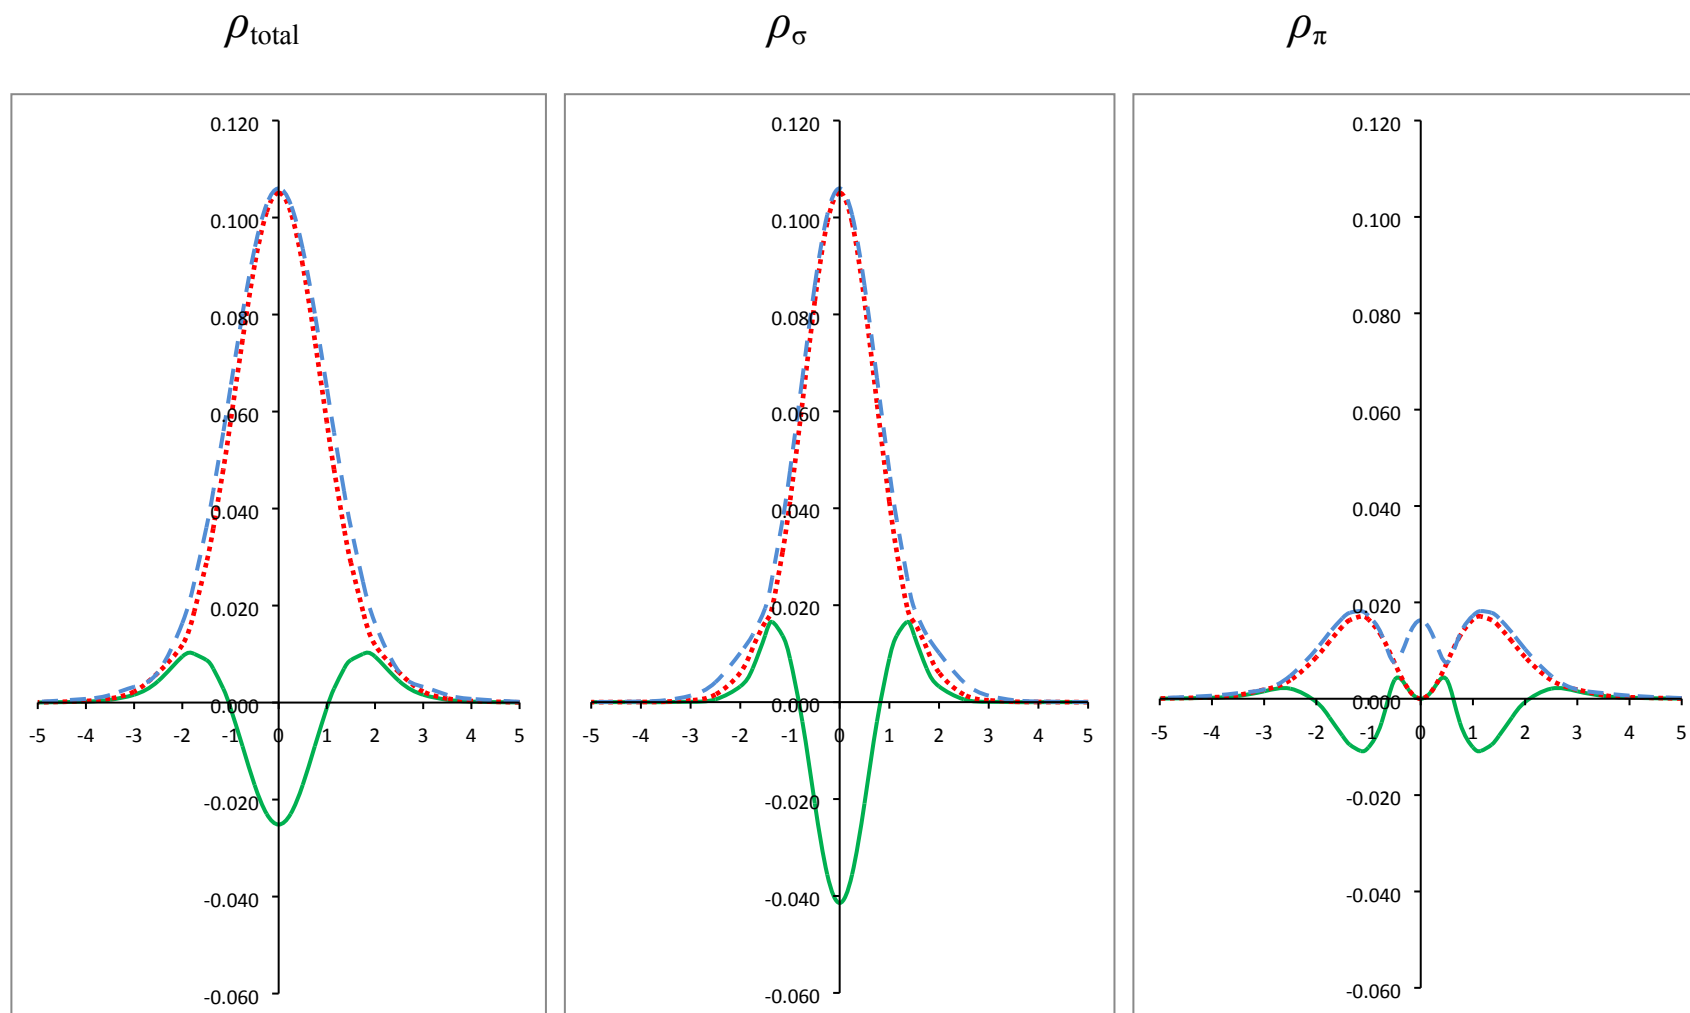

**F2 (continued).** The plot of Hessian's eigenvalues of  $\rho_{total}$ ,  $\rho_{\sigma}$  and  $\rho_{\pi}$  versus distance (horizontal axis) from the ring center of 1,3,5-Triazine.

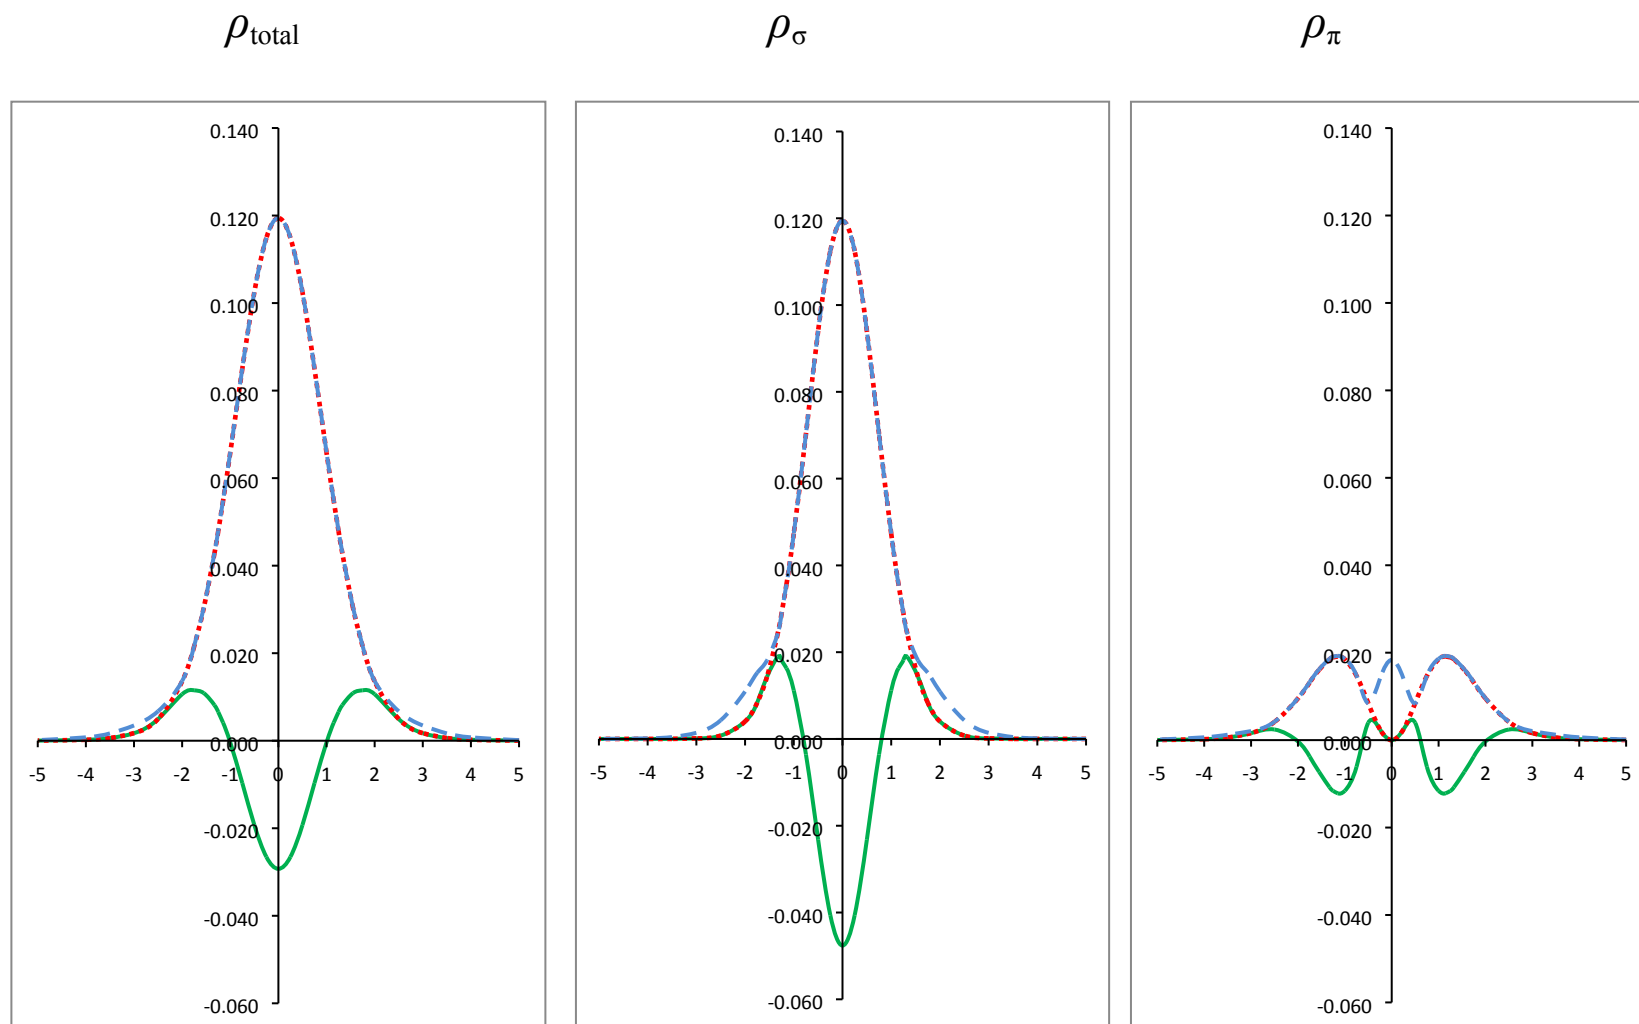

**F2 (continued).** The plot of Hessian's eigenvalues of  $\rho_{total}$ ,  $\rho_{\sigma}$  and  $\rho_{\pi}$  versus distance (horizontal axis) from the ring center of 1,2,4-Triazine.

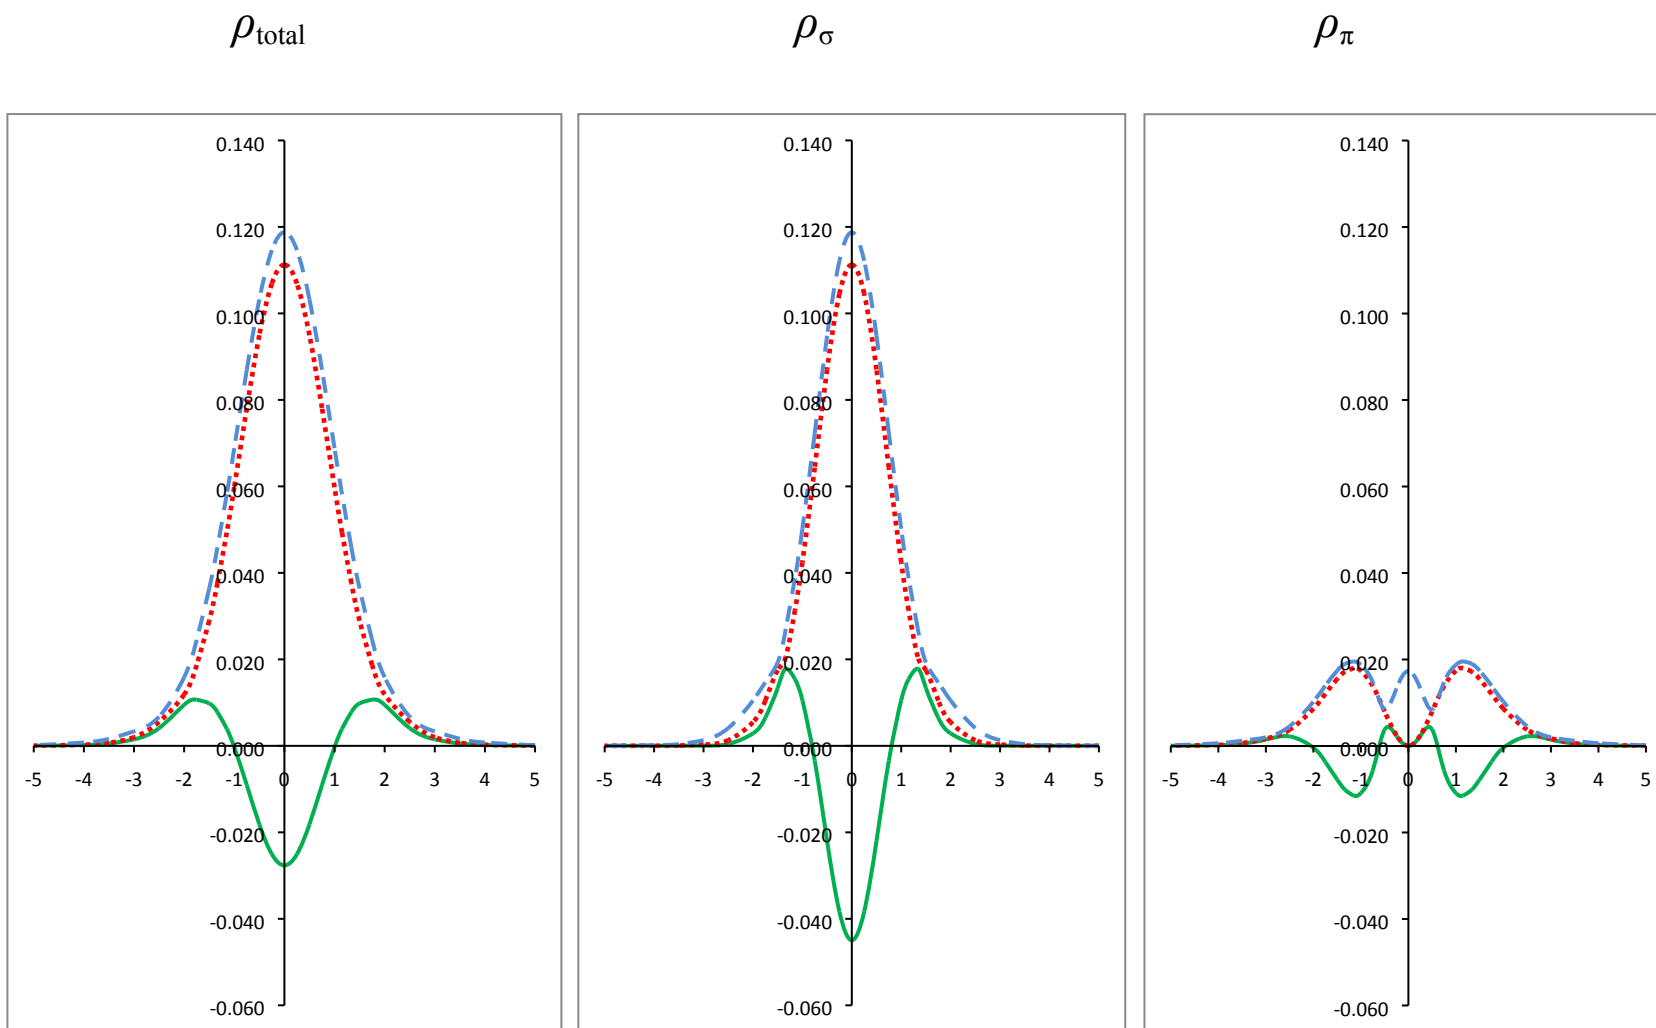

**F2 (continued).** The plot of Hessian's eigenvalues of  $\rho_{total}$ ,  $\rho_\sigma$  and  $\rho_\pi$  versus distance (horizontal axis) from the ring center of 1,2,3-Triazine.

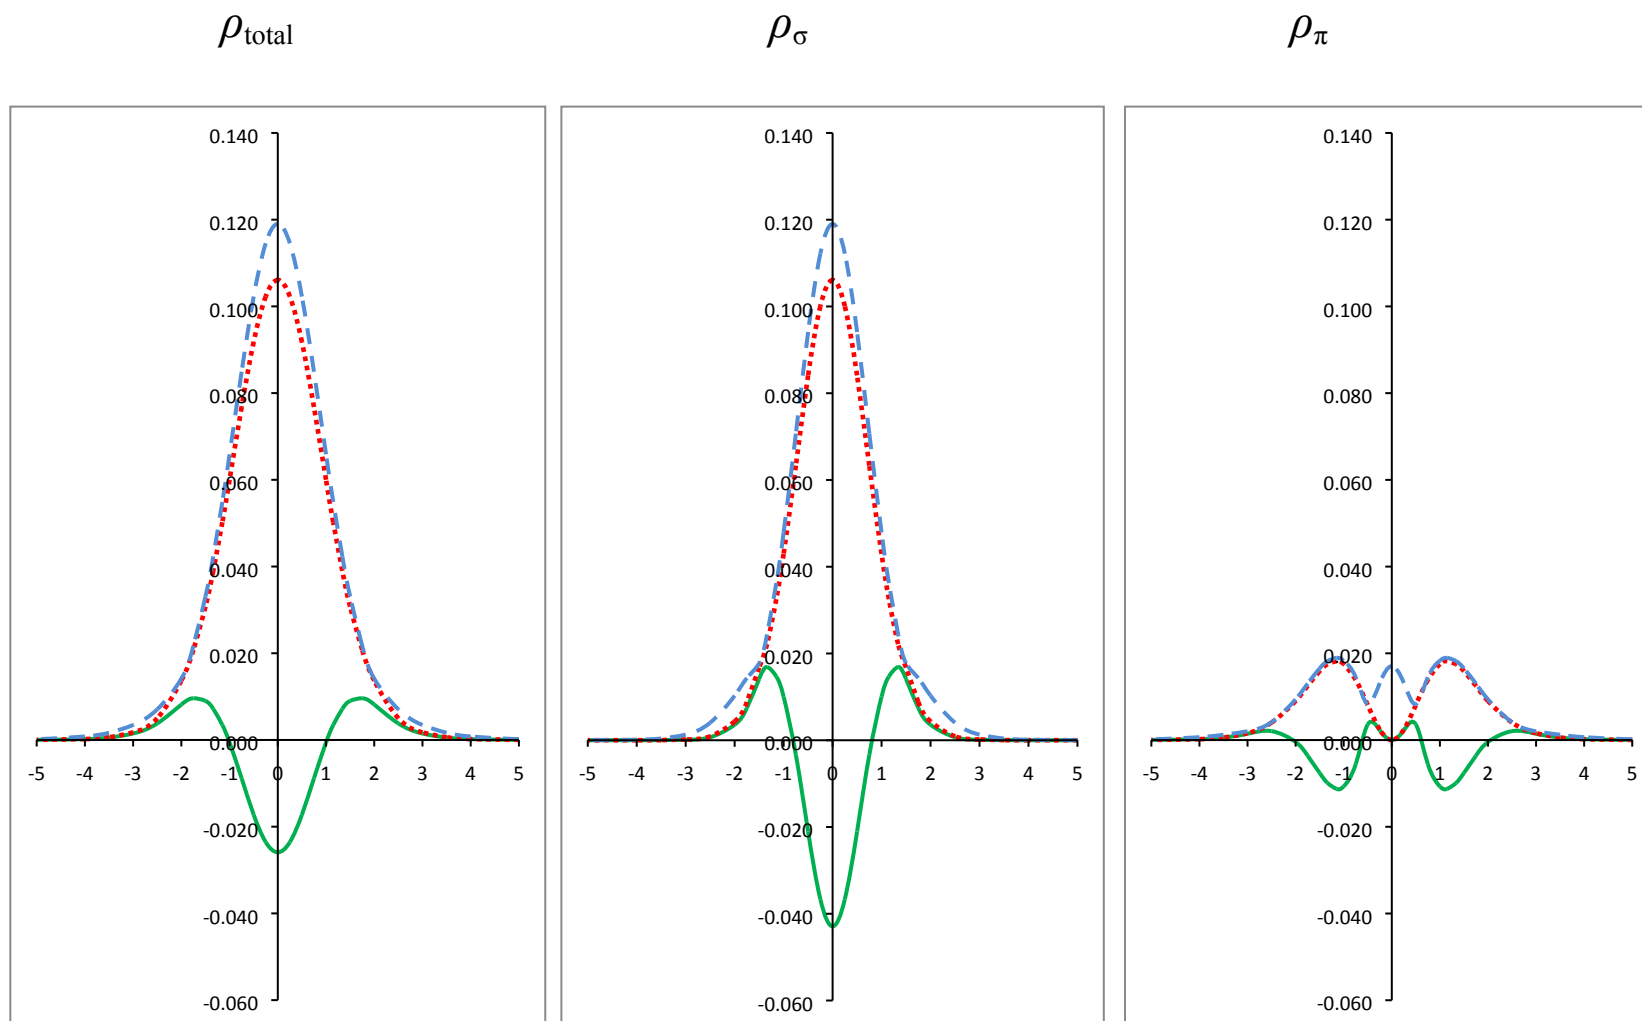

**F2 (continued).** The plot of Hessian's eigenvalues of  $\rho_{total}$ ,  $\rho_{\sigma}$  and  $\rho_{\pi}$  versus distance (horizontal axis) from the ring center of  $C_5H_4BH_2^-$ .

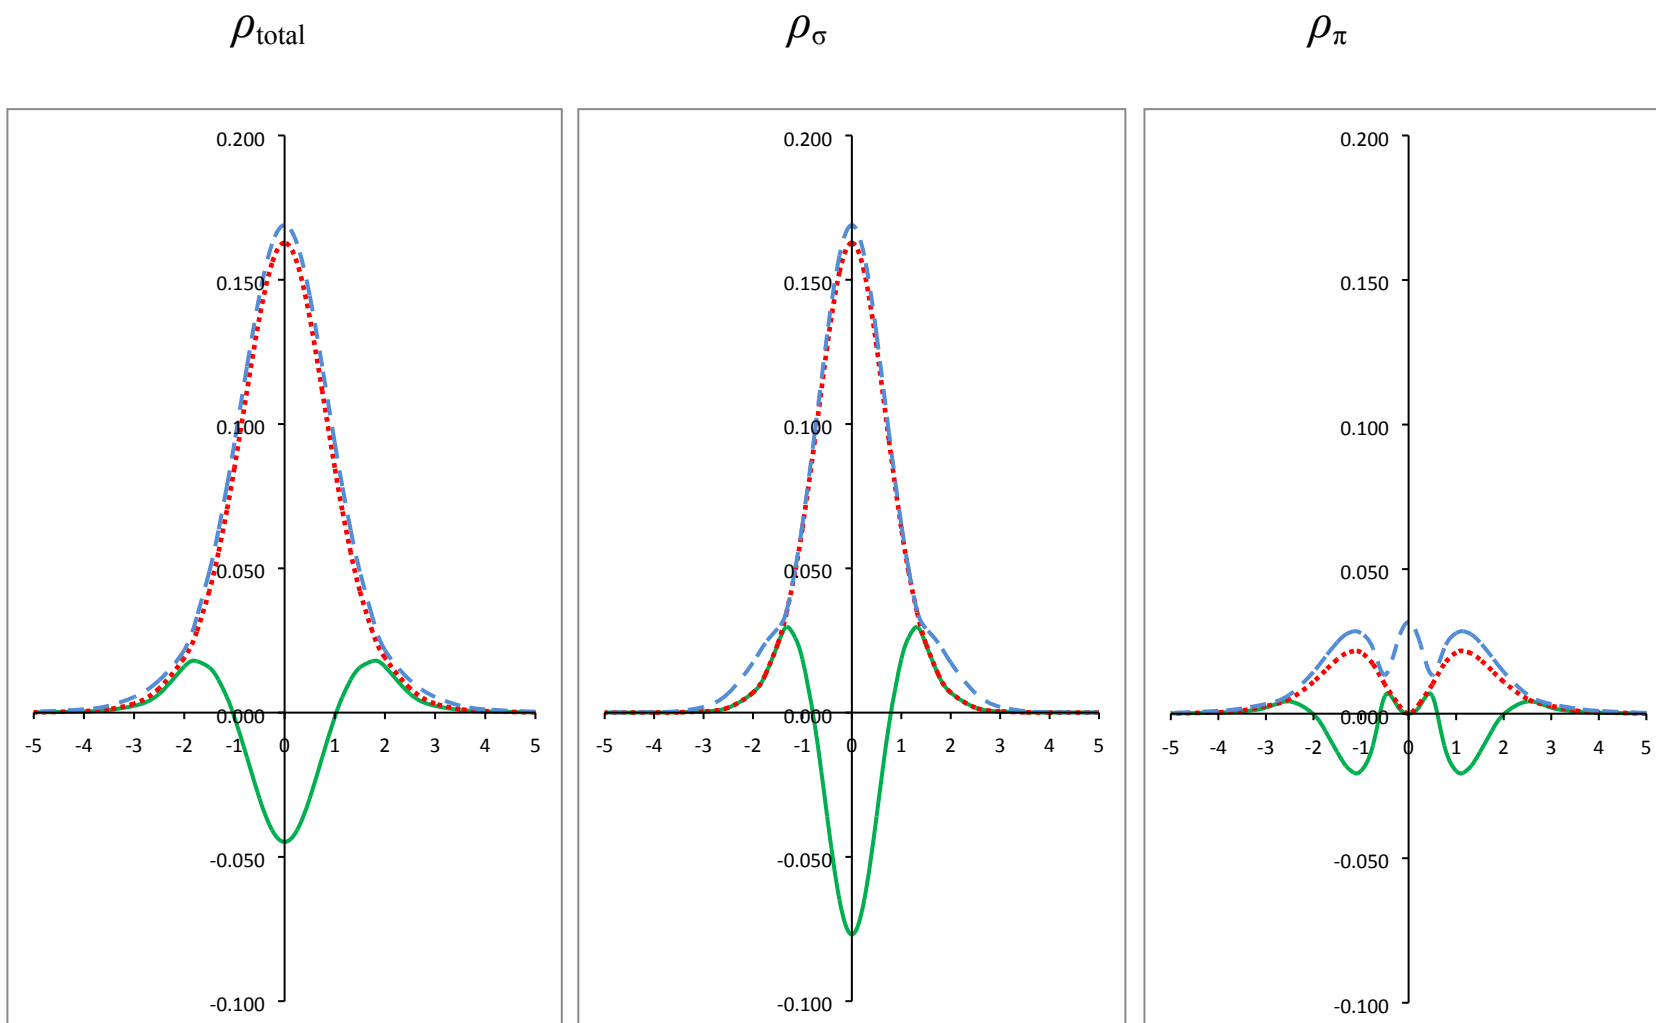

**F2 (continued).** The plot of Hessian's eigenvalues of  $\rho_{total}$ ,  $\rho_{\sigma}$  and  $\rho_{\pi}$  versus distance (horizontal axis) from the ring center of  $C_5H_4CH_2$ .

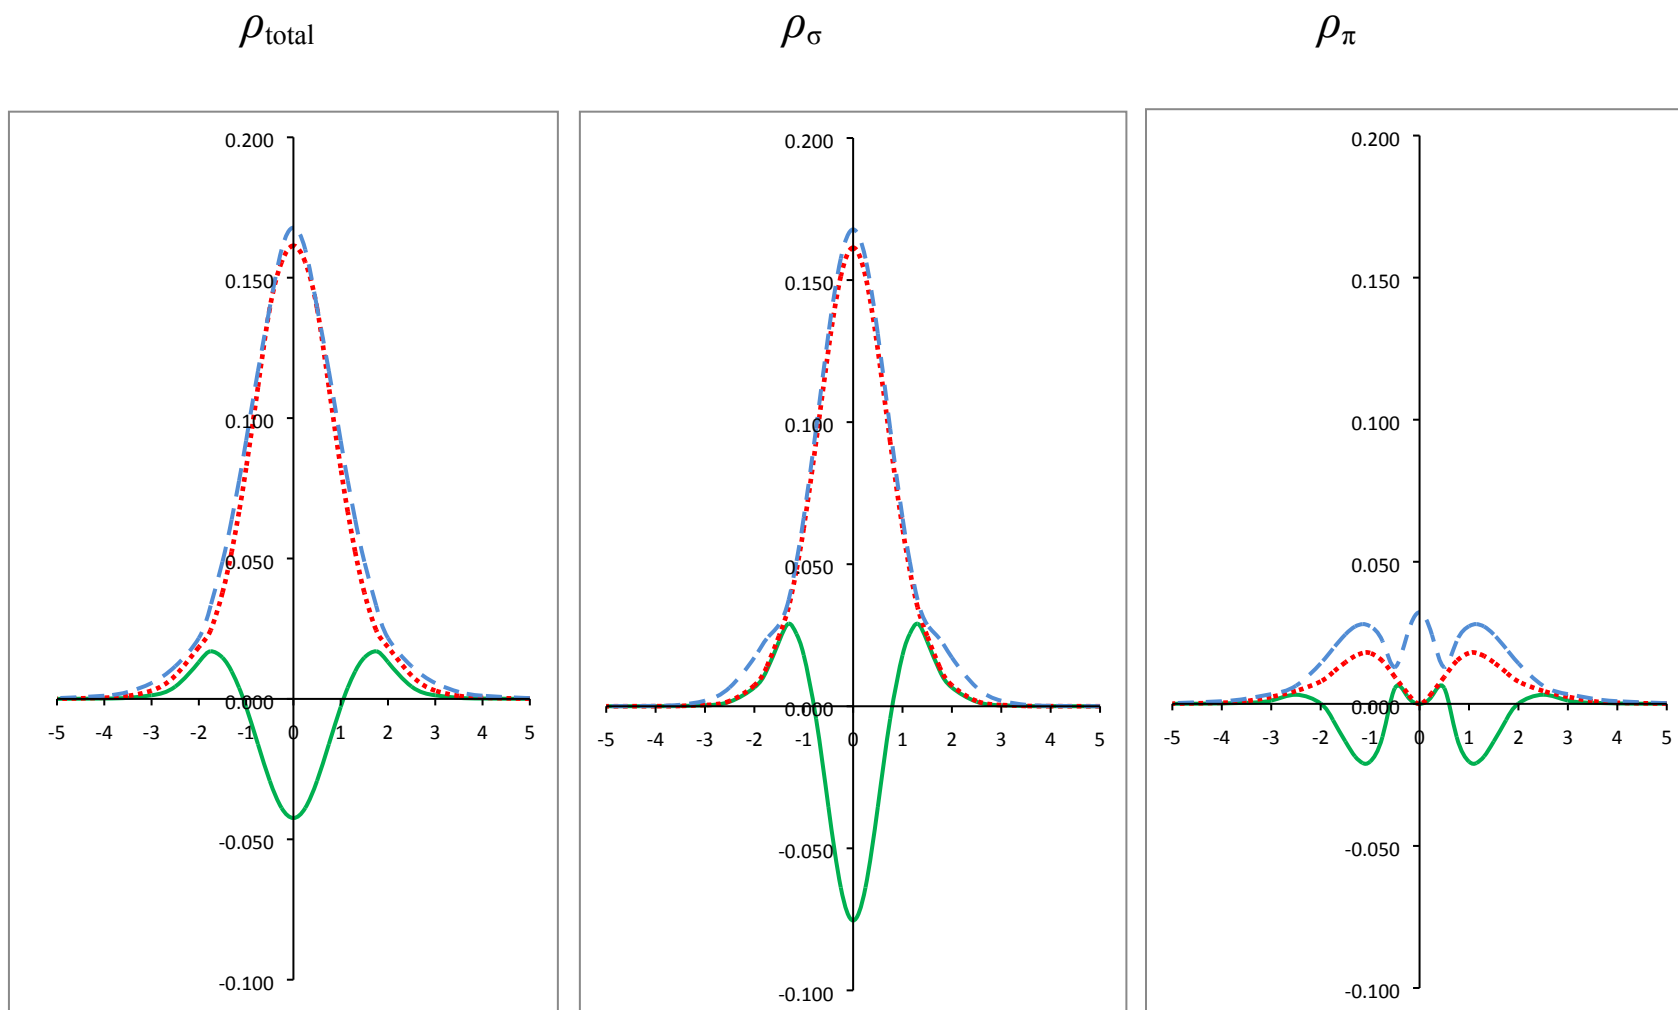

**F2 (continued).** The plot of Hessian's eigenvalues of  $\rho_{total}$ ,  $\rho_{\sigma}$  and  $\rho_{\pi}$  versus distance (horizontal axis) from the ring center of  $C_5H_4NH_2^+$ .

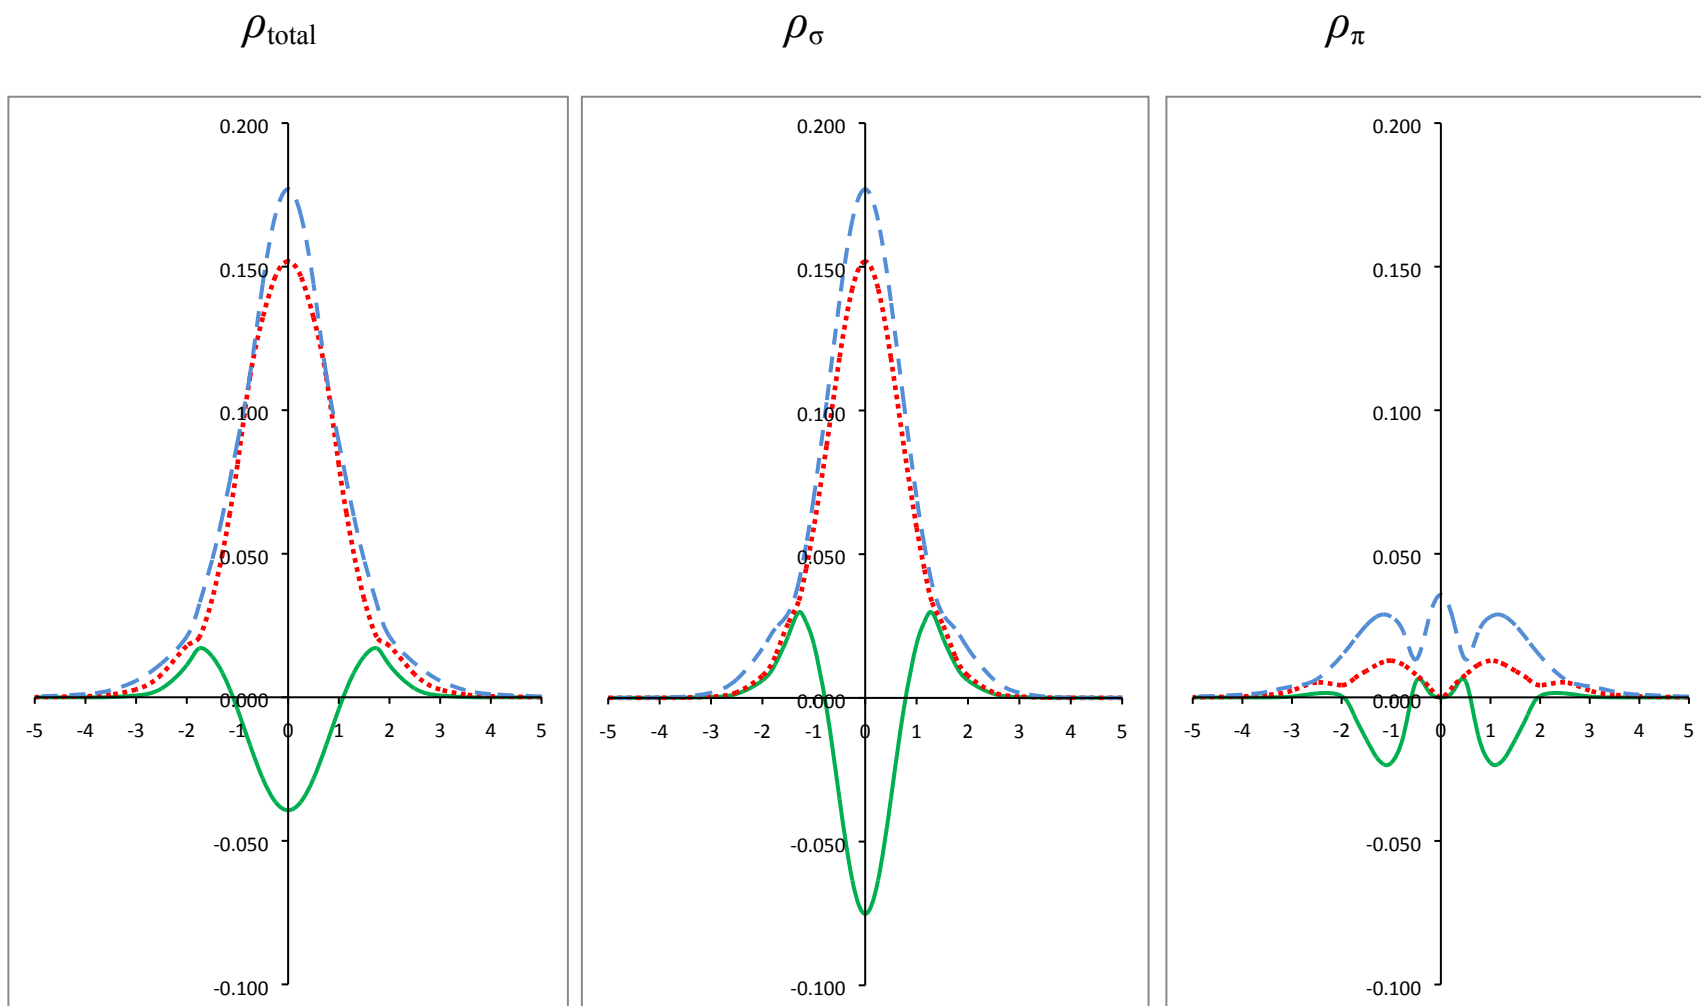



**F2 (continued).** The plot of Hessian's eigenvalues of  $\rho_{total}$ ,  $\rho_{\sigma}$  and  $\rho_{\pi}$  versus distance (horizontal axis) from the ring center of  $C_5H_4O$ .

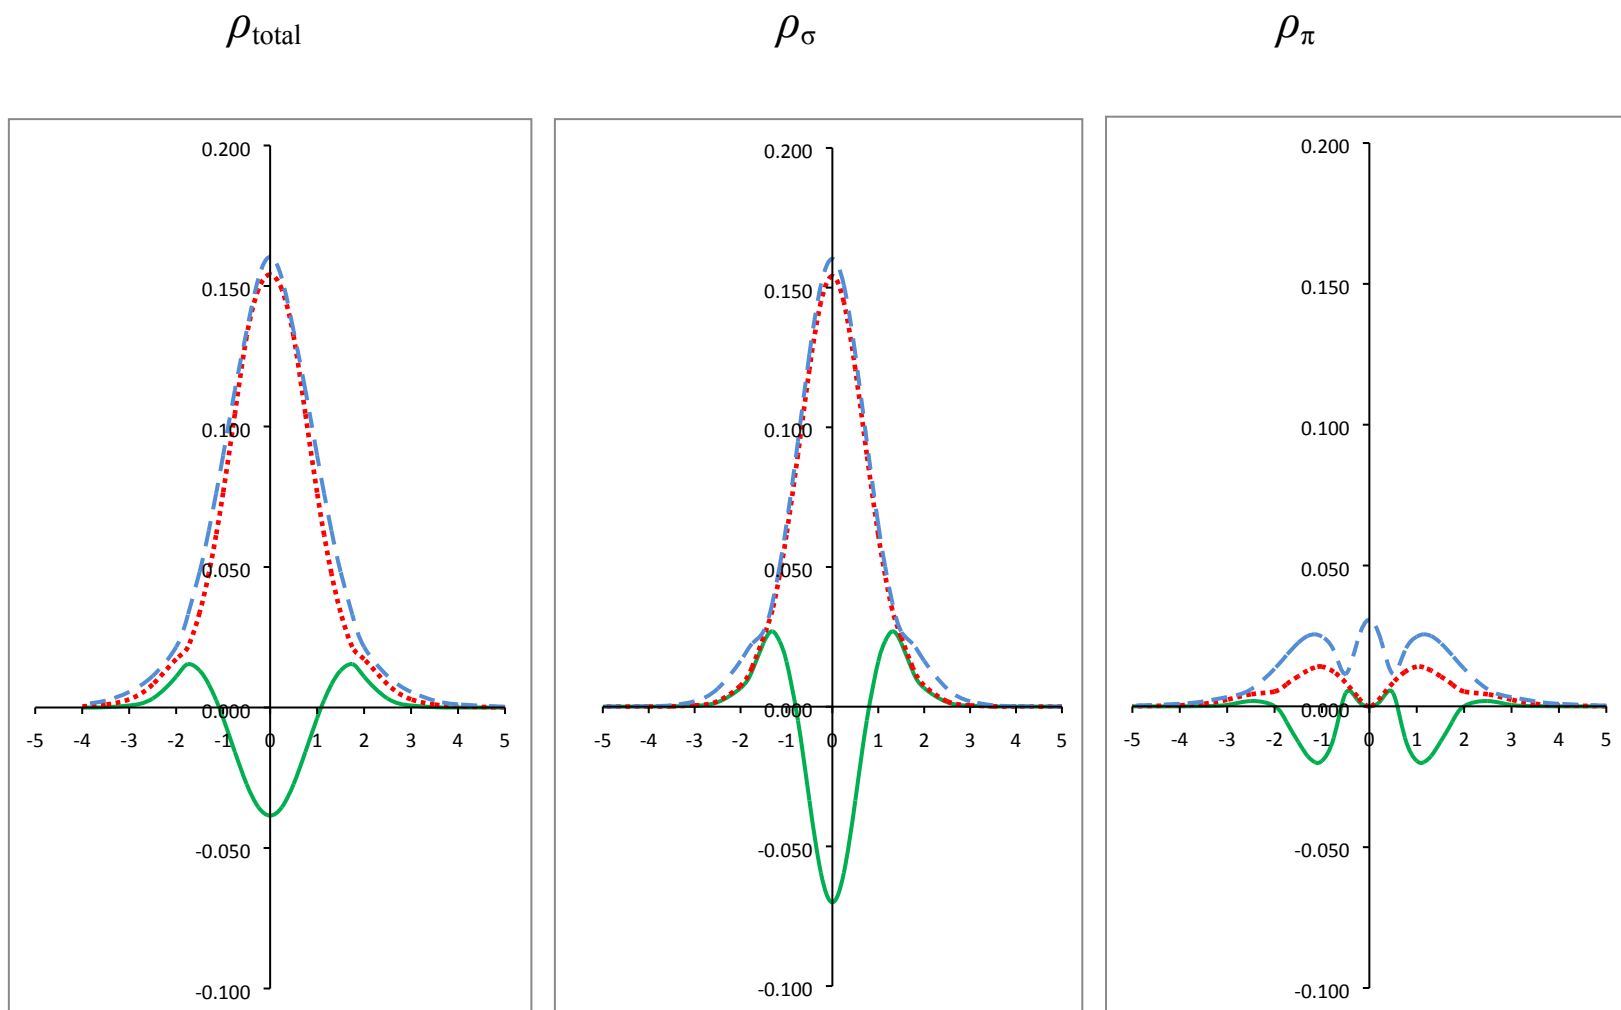

**F2 (continued).** The plot of Hessian's eigenvalues of  $\rho_{total}$ ,  $\rho_{\sigma}$  and  $\rho_{\pi}$  versus distance (horizontal axis) from the ring center of  $C_7H_6BH_2^-$ .

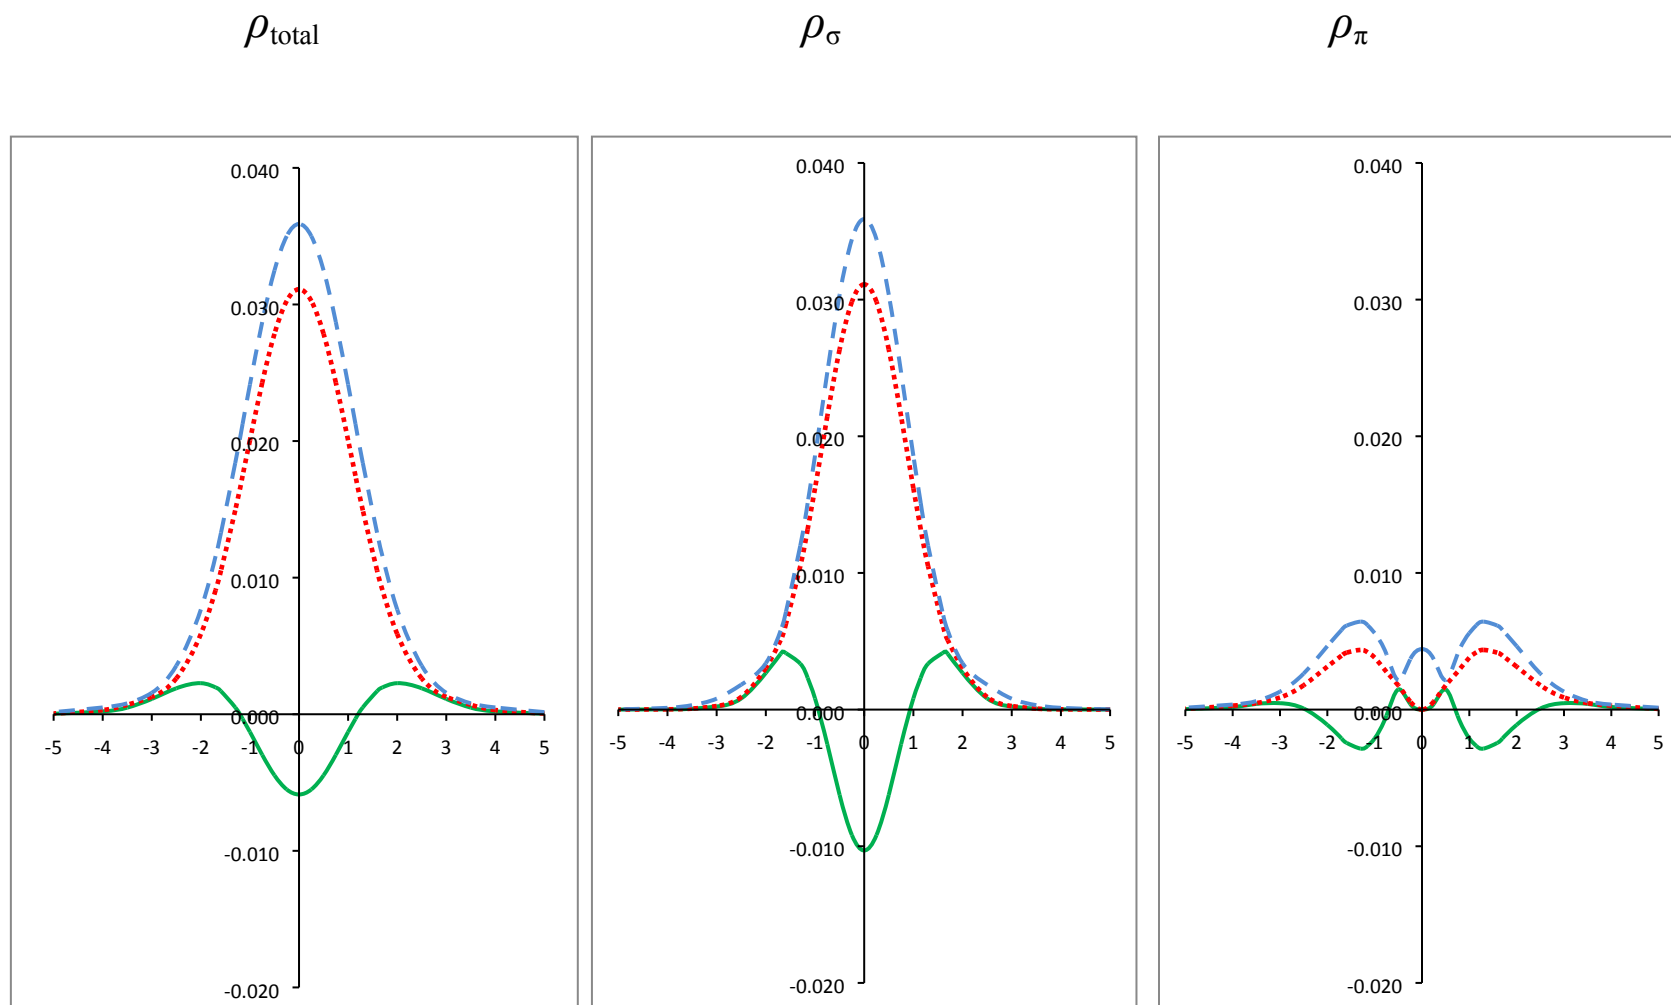

**F2 (continued).** The plot of Hessian's eigenvalues of  $\rho_{total}$ ,  $\rho_{\sigma}$  and  $\rho_{\pi}$  versus distance (horizontal axis) from the ring center of  $C_7H_6CH_2$ .

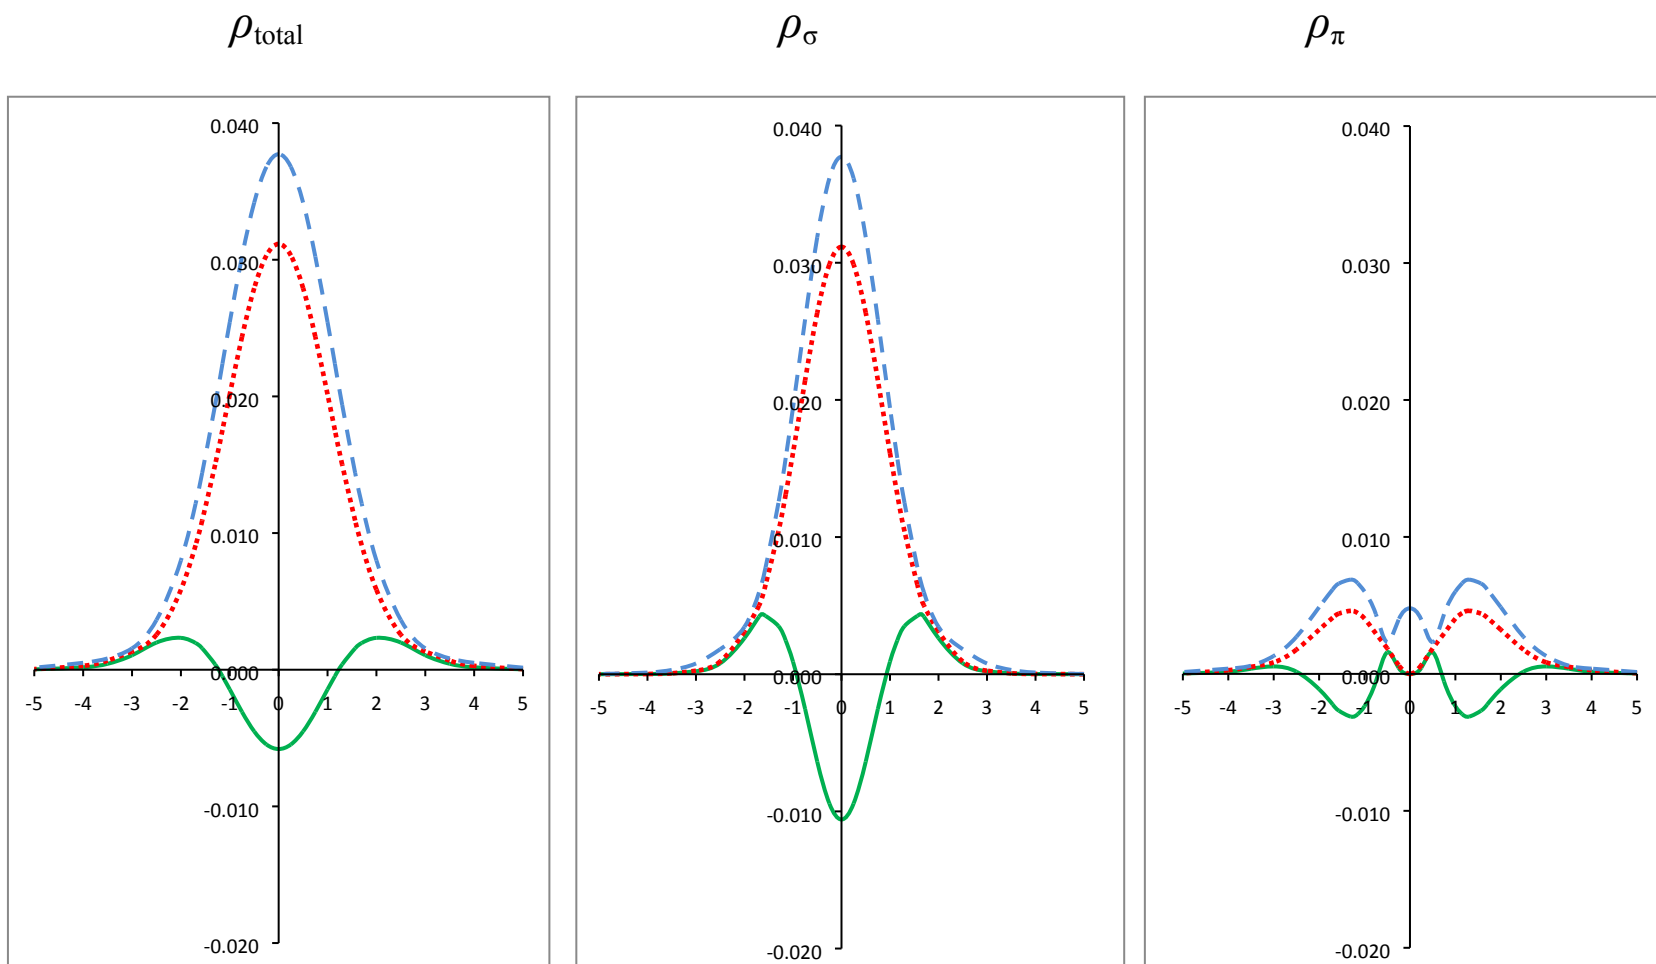

**F2 (continued).** The plot of Hessian's eigenvalues of  $\rho_{total}$ ,  $\rho_{\sigma}$  and  $\rho_{\pi}$  versus distance (horizontal axis) from the ring center of  $C_7H_6NH_2^+$ .

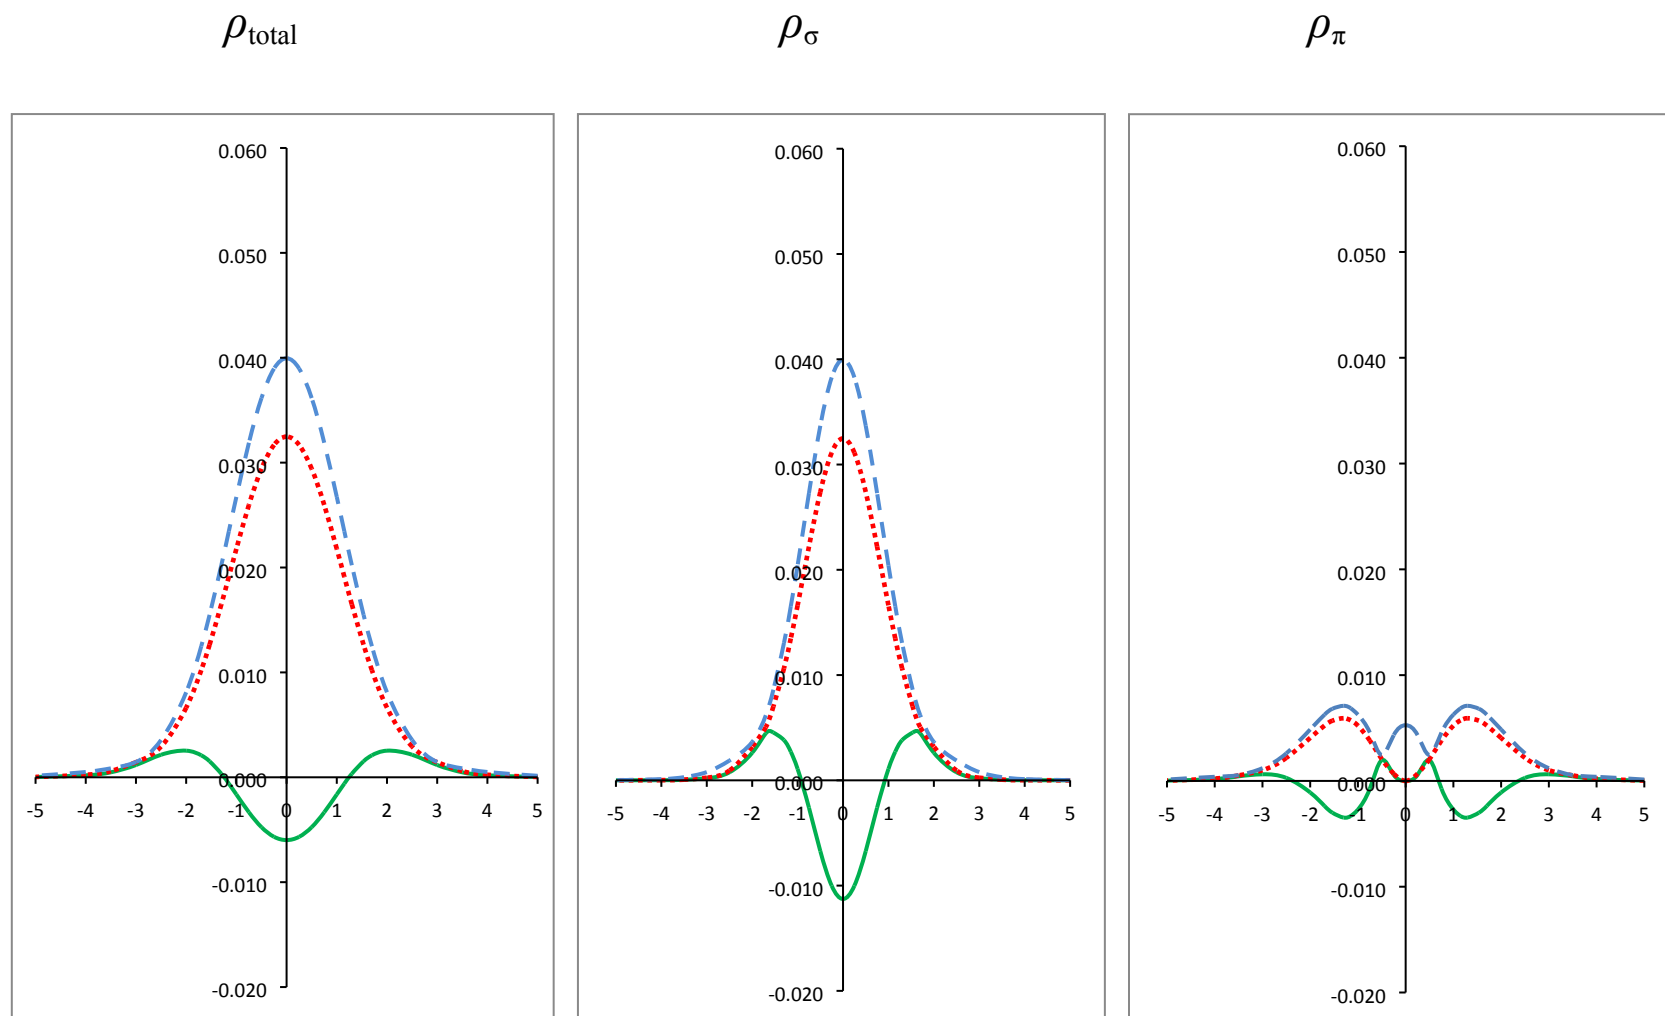

**F2 (continued).** The plot of Hessian's eigenvalues of  $\rho_{total}$ ,  $\rho_{\sigma}$  and  $\rho_{\pi}$  versus distance (horizontal axis) from the ring center of  $C_7H_6O$ .

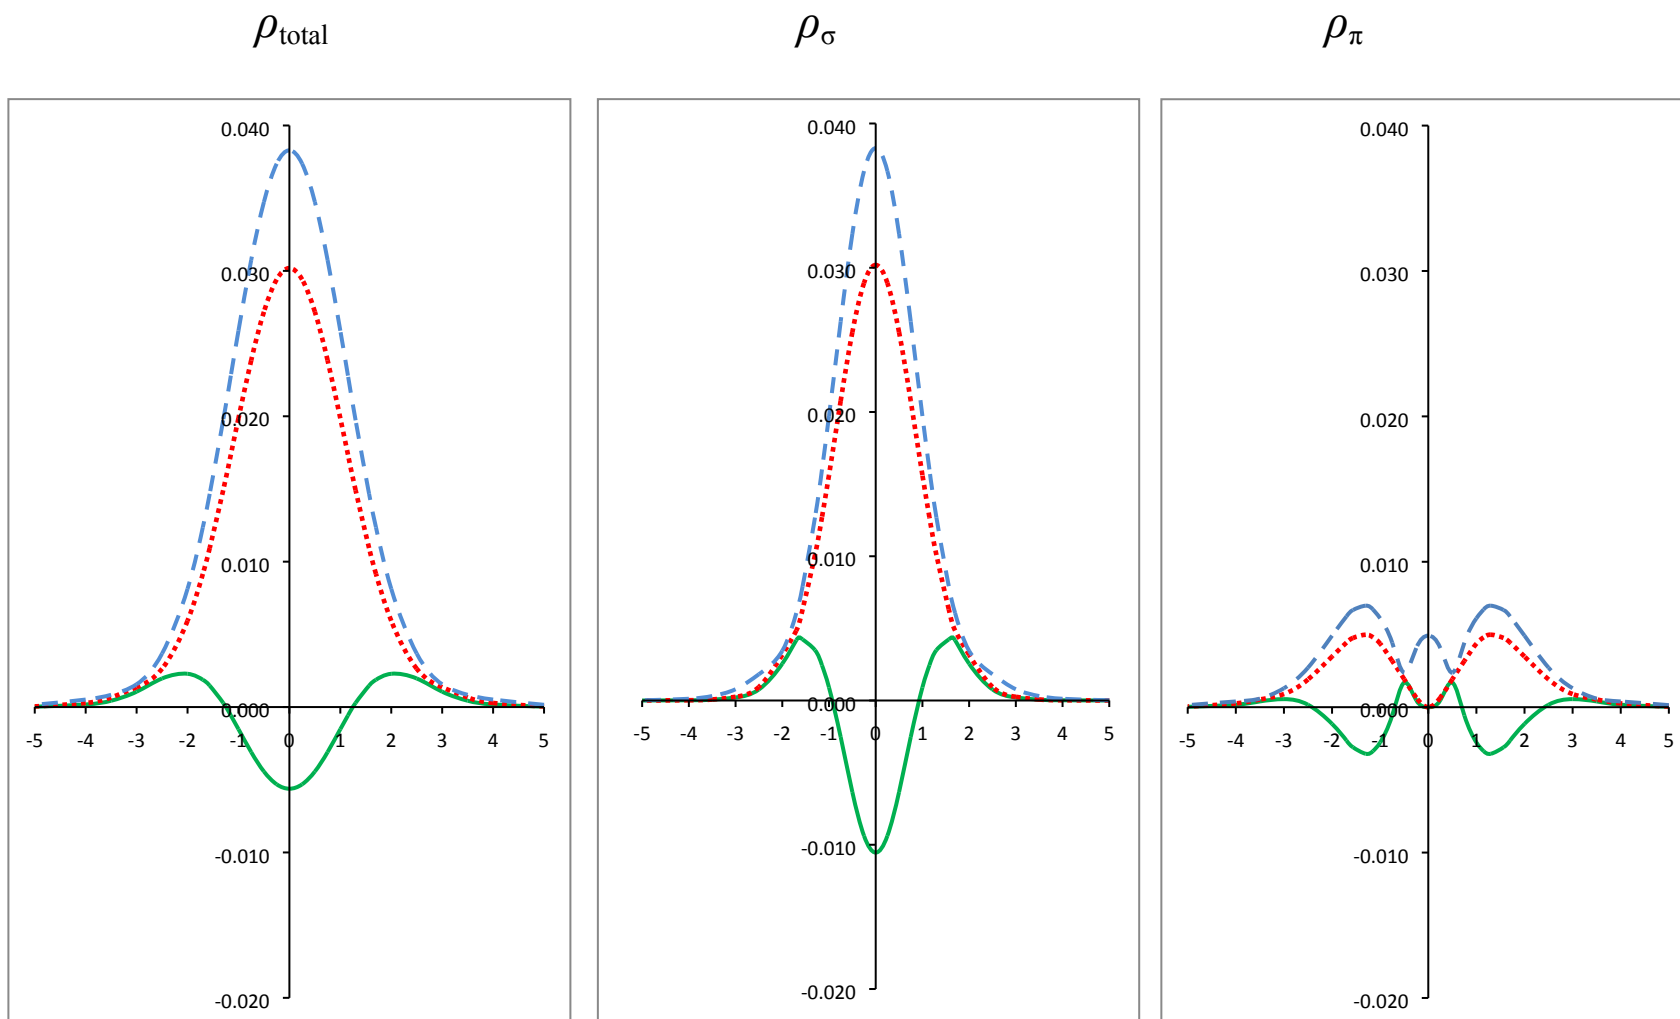

**S1.**

An ellipse in canonical position (center at origin, here center at scanned points along the axis perpendicular to the ring plane), can be expressed *parametrically* as the path of a point  $(X(u), Y(u))$ , where

$$X(u) = \lambda_2 \sin u$$

$$Y(u) = \lambda_3 \cos u$$

Note that the parameter  $u$  (called the eccentric anomaly in astronomy) is an angular parameter that defines the position of the point  $(X(u), Y(u))$  that is moving along an elliptic orbit.

In Figure 3, the anisotropy of electron density at scanned points has been shown by the ratio of the two positive eigenvalues,  $\lambda_2$  and  $\lambda_3$ , as a parametric form of the equation of an ellipse.

**T1.**The electron density values of total electron density ( $\rho_{total}$ ) and its  $\sigma$ - and  $\pi$ -components ( $\rho_{\sigma}$  and  $\rho_{\pi}$ ) at the RCP for all studied

|                 |                               |                                |                             |
|-----------------|-------------------------------|--------------------------------|-----------------------------|
| $C_6H_6SiH^+$   | 0.007624                      | 0.007624                       | 0.001551                    |
| $C_6H_6P^+$     | 0.008283                      | 0.008283                       | 0.001587                    |
| $NAMSE$         | $\rho_{RCP,Total}^{0.007600}$ | $\rho_{RCP,\sigma}^{0.007600}$ | $\rho_{RCP,\pi}^{0.001428}$ |
| $C_4H_4BH$      | 0.042433                      | 0.042433                       | 0.002259                    |
| $C_5H_4AlH$     | 0.042859                      | 0.042859                       | 0.003225                    |
| $C_3H_4NH^+$    | 0.043933                      | 0.043933                       | 0.010379                    |
| $C_4H_4O$       | 0.043992                      | 0.043992                       | 0.008712                    |
| $C_7H_6SiH_2^+$ | 0.099518                      | 0.099518                       | 0.001238                    |
| $C_7H_6SiH_2$   | 0.099534                      | 0.099534                       | 0.001973                    |
| $C_7H_4NH^+$    | 0.049978                      | 0.049978                       | 0.003999                    |
| $C_7H_6S$       | 0.002599                      | 0.002599                       | 0.000025                    |
| Pyridazine      | 0.021797                      | 0.021797                       | 0.004966                    |
| Pyrimidine      | 0.023092                      | 0.023092                       | 0.004308                    |
| Pyrazine        | 0.020968                      | 0.020968                       | 0.004999                    |
| 1,3-Triazine    | 0.022089                      | 0.022089                       | 0.004517                    |
| 1,2,4-Triazine  | 0.014091                      | 0.014091                       | 0.002853                    |
| 1,2,3-Triazine  | 0.019989                      | 0.019989                       | 0.005134                    |
| $C_5H_5P$       | 0.019360                      | 0.019360                       | 0.003675                    |
| $C_5H_5S^+$     | 0.020126                      | 0.020126                       | 0.003778                    |
| $C_6H_6BH$      | 0.009378                      | 0.009378                       | 0.001847                    |
| $C_6H_6NH$      | 0.009619                      | 0.009619                       | 0.001915                    |
| $C_6H_6N^+$     | 0.011343                      | 0.011343                       | 0.002100                    |
| $C_6H_6O$       | 0.010564                      | 0.010564                       | 0.002058                    |
| $C_6H_6AlH$     | 0.006550                      | 0.006550                       | 0.001206                    |

compounds, in atomic units. These values are maximum values of electron density along the scan axis.





**T2.** The values of electron density and its Hessian's eigenvalues of  $\rho_{total}$ ,  $\rho_{\sigma}$  and  $\rho_{\pi}$  in atomic units for  $C_4H_4BH$ . The highlighted cells display the position of RCPs of  $\rho_{\pi}$ .

| R(Å)  | $\rho(r)_{\pi}$ |             |             |             | $\rho(r)_{\sigma}$ |             |             |             | $\rho(r)_{total}$ |             |             |             |
|-------|-----------------|-------------|-------------|-------------|--------------------|-------------|-------------|-------------|-------------------|-------------|-------------|-------------|
|       | $\rho$          | $\lambda_1$ | $\lambda_2$ | $\lambda_3$ | $\rho$             | $\lambda_1$ | $\lambda_2$ | $\lambda_3$ | $\rho$            | $\lambda_1$ | $\lambda_2$ | $\lambda_3$ |
| 5.00  | 0.0000686       | -0.0000155  | 0.0000506   | 0.0002214   | 0.0000049          | 0.0000009   | 0.0000018   | 0.0000293   | 0.0000918         | -0.0000125  | 0.0000629   | 0.0002962   |
| 4.00  | 0.0003748       | -0.0000705  | 0.0002971   | 0.0008833   | 0.0000477          | 0.0000191   | 0.0000288   | 0.0002477   | 0.0005189         | -0.0000233  | 0.0003990   | 0.0012631   |
| 3.00  | 0.0015990       | -0.0002277  | 0.0017772   | 0.0024033   | 0.0004401          | 0.0003599   | 0.0004575   | 0.0023834   | 0.0024396         | 0.0005843   | 0.0028298   | 0.0053644   |
| 2.50  | 0.0029512       | -0.0001890  | 0.0027086   | 0.0043231   | 0.0013605          | 0.0016478   | 0.0018984   | 0.0067906   | 0.0051110         | 0.0025781   | 0.0078980   | 0.0100194   |
| 2.00  | 0.0048666       | -0.0000888  | 0.0007456   | 0.0090564   | 0.0040299          | 0.0067397   | 0.0069815   | 0.0155696   | 0.0102527         | 0.0088516   | 0.0145998   | 0.0203787   |
| 1.75  | 0.0058629       | -0.0038303  | 0.0017808   | 0.0119060   | 0.0066574          | 0.0125925   | 0.0126677   | 0.0206278   | 0.0140786         | 0.0131832   | 0.0171321   | 0.0309856   |
| 1.50  | 0.0066279       | -0.0091154  | 0.0031195   | 0.0143657   | 0.0105562          | 0.0216516   | 0.0224730   | 0.0239287   | 0.0187701         | 0.0112875   | 0.0268668   | 0.0450601   |
| 1.30  | 0.0068683       | -0.0134233  | 0.0041544   | 0.0154960   | 0.0148249          | 0.0229883   | 0.0327274   | 0.0342807   | 0.0231320         | 0.0067231   | 0.0387637   | 0.0590663   |
| 1.15  | 0.0067228       | -0.0154301  | 0.0046914   | 0.0155293   | 0.0184562          | 0.0194178   | 0.0427521   | 0.0450924   | 0.0264264         | 0.0020860   | 0.0492722   | 0.0702135   |
| 1.00  | 0.0062436       | -0.0155916  | 0.0049562   | 0.0147327   | 0.0226175          | 0.0125099   | 0.0550121   | 0.0582837   | 0.0298604         | -0.0036585  | 0.0616560   | 0.0823605   |
| 0.75  | 0.0047127       | -0.0097356  | 0.0046058   | 0.0114802   | 0.0300543          | -0.0063730  | 0.0788226   | 0.0838684   | 0.0353297         | -0.0144294  | 0.0845399   | 0.1028521   |
| 0.50  | 0.0026153       | 0.0014293   | 0.0052984   | 0.0065930   | 0.0370640          | -0.0309869  | 0.1033389   | 0.1102276   | 0.0399037         | -0.0247030  | 0.1068381   | 0.1211081   |
| 0.25  | 0.0007511       | 0.0008271   | 0.0020069   | 0.0187378   | 0.0421539          | -0.0526324  | 0.1223191   | 0.1306771   | 0.0429528         | -0.0320678  | 0.1233931   | 0.1338624   |
| 0.00  | 0.0000000       | 0.0000000   | 0.0000113   | 0.0252117   | 0.0440241          | -0.0613405  | 0.1295308   | 0.1384601   | 0.0440241         | -0.0347353  | 0.1295314   | 0.1384610   |
| -0.25 | 0.0007511       | 0.0008271   | 0.0020069   | 0.0187378   | 0.0421539          | -0.0526324  | 0.1223191   | 0.1306771   | 0.0429528         | -0.0320678  | 0.1233931   | 0.1338624   |
| -0.50 | 0.0026153       | 0.0014293   | 0.0052984   | 0.0065930   | 0.0370640          | -0.0309869  | 0.1033389   | 0.1102276   | 0.0399037         | -0.0247030  | 0.1068381   | 0.1211081   |
| -0.75 | 0.0047127       | -0.0097356  | 0.0046058   | 0.0114802   | 0.0300543          | -0.0063730  | 0.0788226   | 0.0838684   | 0.0353297         | -0.0144294  | 0.0845399   | 0.1028521   |
| -1.00 | 0.0062436       | -0.0155916  | 0.0049562   | 0.0147327   | 0.0226175          | 0.0125099   | 0.0550121   | 0.0582837   | 0.0298604         | -0.0036585  | 0.0616560   | 0.0823605   |
| -1.15 | 0.0067228       | -0.0154301  | 0.0046914   | 0.0155293   | 0.0184562          | 0.0194178   | 0.0427521   | 0.0450924   | 0.0264264         | 0.0020860   | 0.0492722   | 0.0702135   |
| -1.30 | 0.0068683       | -0.0134233  | 0.0041544   | 0.0154960   | 0.0148249          | 0.0229883   | 0.0327274   | 0.0342807   | 0.0231320         | 0.0067231   | 0.0387637   | 0.0590663   |
| -1.50 | 0.0066279       | -0.0091154  | 0.0031195   | 0.0143657   | 0.0105562          | 0.0216516   | 0.0224730   | 0.0239287   | 0.0187701         | 0.0112875   | 0.0268668   | 0.0450601   |
| -1.75 | 0.0058629       | -0.0038303  | 0.0017808   | 0.0119060   | 0.0066574          | 0.0125925   | 0.0126677   | 0.0206278   | 0.0140786         | 0.0131832   | 0.0171321   | 0.0309856   |
| -2.00 | 0.0048666       | -0.0000888  | 0.0007456   | 0.0090564   | 0.0040299          | 0.0067397   | 0.0069815   | 0.0155696   | 0.0102527         | 0.0088516   | 0.0145998   | 0.0203787   |
| -2.50 | 0.0029512       | -0.0001890  | 0.0027086   | 0.0043231   | 0.0013605          | 0.0016478   | 0.0018984   | 0.0067906   | 0.0051110         | 0.0025781   | 0.0078980   | 0.0100194   |
| -3.00 | 0.0015990       | -0.0002277  | 0.0017772   | 0.0024033   | 0.0004401          | 0.0003599   | 0.0004575   | 0.0023834   | 0.0024396         | 0.0005843   | 0.0028298   | 0.0053644   |
| -4.00 | 0.0003748       | -0.0000705  | 0.0002971   | 0.0008833   | 0.0000477          | 0.0000191   | 0.0000288   | 0.0002477   | 0.0005189         | -0.0000233  | 0.0003990   | 0.0012631   |
| -5.00 | 0.0000686       | -0.0000155  | 0.0000506   | 0.0002214   | 0.0000049          | 0.0000009   | 0.0000018   | 0.0000293   | 0.0000918         | -0.0000125  | 0.0000629   | 0.0002962   |

**T2 (continued).** The values of electron density and its Hessian's eigenvalues of  $\rho_{total}$ ,  $\rho_\sigma$  and  $\rho_\pi$  in atomic units for  $C_4H_4AlH$ . The highlighted cells display the position of RCPs of  $\rho_\pi$ .

| R(Å)  | $\rho(r)_\pi$ |             |             |             | $\rho(r)_\sigma$ |             |             |             | $\rho(r)_{total}$ |             |             |             |
|-------|---------------|-------------|-------------|-------------|------------------|-------------|-------------|-------------|-------------------|-------------|-------------|-------------|
|       | $\rho$        | $\lambda_1$ | $\lambda_2$ | $\lambda_3$ | $\rho$           | $\lambda_1$ | $\lambda_2$ | $\lambda_3$ | $\rho$            | $\lambda_1$ | $\lambda_2$ | $\lambda_3$ |
| 5.00  | 0.00006095    | -0.00001209 | 0.00004317  | 0.00016837  | 0.00001990       | -0.00000788 | 0.00000604  | 0.00007789  | 0.00010651        | -0.00000229 | 0.00006581  | 0.00029764  |
| 4.00  | 0.00028460    | -0.00004893 | 0.00024059  | 0.00059318  | 0.00012289       | -0.00002718 | 0.00004852  | 0.00051317  | 0.00054085        | 0.00006085  | 0.00039599  | 0.00117787  |
| 3.00  | 0.00105844    | -0.00016031 | 0.00114205  | 0.00126594  | 0.00076631       | 0.00010740  | 0.00056546  | 0.00285866  | 0.00231539        | 0.00083041  | 0.00243764  | 0.00407555  |
| 2.50  | 0.00180030    | -0.00028298 | 0.00102318  | 0.00235800  | 0.00185996       | 0.00087079  | 0.00210419  | 0.00603759  | 0.00452293        | 0.00253768  | 0.00631442  | 0.00655087  |
| 2.00  | 0.00266616    | -0.00114777 | 0.00067567  | 0.00420911  | 0.00432911       | 0.00364467  | 0.00714299  | 0.01055479  | 0.00834599        | 0.00675128  | 0.00789328  | 0.01539452  |
| 1.75  | 0.00302247    | -0.00258977 | 0.00190355  | 0.00505743  | 0.00641328       | 0.00651439  | 0.01226056  | 0.01234613  | 0.01097820        | 0.00699483  | 0.010415772 | 0.02287917  |
| 1.50  | 0.00323238    | -0.00442427 | 0.00487106  | 0.00543304  | 0.00922187       | 0.01069874  | 0.01238234  | 0.02022063  | 0.01404078        | 0.00460216  | 0.01526612  | 0.03255747  |
| 1.38  | 0.00326026    | -0.00532877 | 0.00532534  | 0.00715903  | 0.01085298       | 0.01113592  | 0.01361740  | 0.02514180  | 0.01563938        | 0.00286823  | 0.01805878  | 0.03797078  |
| 1.15  | 0.00314955    | -0.00667655 | 0.00445946  | 0.01310436  | 0.01435591       | 0.00706156  | 0.01955005  | 0.03640621  | 0.01874697        | -0.00125500 | 0.02399123  | 0.04913947  |
| 1.00  | 0.00294400    | -0.00697893 | 0.00343565  | 0.01774728  | 0.01686954       | 0.00259454  | 0.02408218  | 0.04499621  | 0.02076216        | -0.00435650 | 0.02819795  | 0.05681580  |
| 0.75  | 0.00233410    | -0.00572617 | 0.00135476  | 0.02401743  | 0.02113465       | -0.00745005 | 0.03216305  | 0.06042005  | 0.02386729        | -0.00961980 | 0.03525205  | 0.06929150  |
| 0.50  | 0.00140846    | -0.00223373 | -0.00012078 | 0.02359211  | 0.02494611       | -0.01874922 | 0.03977152  | 0.07502836  | 0.02637500        | -0.01416690 | 0.04147730  | 0.07993179  |
| 0.25  | 0.00043801    | -0.00025317 | 0.00057511  | 0.01751100  | 0.02761077       | -0.02782823 | 0.04530154  | 0.08567456  | 0.02800531        | -0.01720652 | 0.04578988  | 0.08710432  |
| 0.00  | 0.00000000    | 0.00000000  | 0.00000082  | 0.01518111  | 0.02857063       | -0.03132338 | 0.04733583  | 0.08959398  | 0.02857063        | -0.01826886 | 0.04733583  | 0.08959543  |
| -0.25 | 0.00043801    | -0.00025317 | 0.00057511  | 0.01751100  | 0.02761077       | -0.02782823 | 0.04530154  | 0.08567456  | 0.02800531        | -0.01720652 | 0.04578988  | 0.08710432  |
| -0.50 | 0.00140846    | -0.00223373 | -0.00012078 | 0.02359211  | 0.02494611       | -0.01874922 | 0.03977152  | 0.07502836  | 0.02637500        | -0.01416690 | 0.04147730  | 0.07993179  |
| -0.75 | 0.00233410    | -0.00572617 | 0.00135476  | 0.02401743  | 0.02113465       | -0.00745005 | 0.03216305  | 0.06042005  | 0.02386729        | -0.00961980 | 0.03525205  | 0.06929150  |
| -1.00 | 0.00294400    | -0.00697893 | 0.00343565  | 0.01774728  | 0.01686954       | 0.00259454  | 0.02408218  | 0.04499621  | 0.02076216        | -0.00435650 | 0.02819795  | 0.05681580  |
| -1.15 | 0.00314955    | -0.00667655 | 0.00445946  | 0.01310436  | 0.01435591       | 0.00706156  | 0.01955005  | 0.03640621  | 0.01874697        | -0.00125500 | 0.02399123  | 0.04913947  |
| -1.38 | 0.00326026    | -0.00532877 | 0.00532534  | 0.00715903  | 0.01085298       | 0.01113592  | 0.01361740  | 0.02514180  | 0.01563938        | 0.00286823  | 0.01805878  | 0.03797078  |
| -1.50 | 0.00323238    | -0.00442427 | 0.00487106  | 0.00543304  | 0.00922187       | 0.01069874  | 0.01238234  | 0.02022063  | 0.01404078        | 0.00460216  | 0.01526612  | 0.03255747  |
| -1.75 | 0.00302247    | -0.00258977 | 0.00190355  | 0.00505743  | 0.00641328       | 0.00651439  | 0.01226056  | 0.01234613  | 0.01097820        | 0.00699483  | 0.010415772 | 0.02287917  |
| -2.00 | 0.00266616    | -0.00114777 | 0.00067567  | 0.00420911  | 0.00432911       | 0.00364467  | 0.00714299  | 0.01055479  | 0.00834599        | 0.00675128  | 0.00789328  | 0.01539452  |
| -2.50 | 0.00180030    | -0.00028298 | 0.00102318  | 0.00235800  | 0.00185996       | 0.00087079  | 0.00210419  | 0.00603759  | 0.00452293        | 0.00253768  | 0.00631442  | 0.00655087  |
| -3.00 | 0.00105844    | -0.00016031 | 0.00114205  | 0.00126594  | 0.00076631       | 0.00010740  | 0.00056546  | 0.00285866  | 0.00231539        | 0.00083041  | 0.00243764  | 0.00407555  |
| -4.00 | 0.00028460    | -0.00004893 | 0.00024059  | 0.00059318  | 0.00012289       | -0.00002718 | 0.00004852  | 0.00051317  | 0.00054085        | 0.00006085  | 0.00039599  | 0.00117787  |
| -5.00 | 0.00006095    | -0.00001209 | 0.00004317  | 0.00016837  | 0.00001990       | -0.00000788 | 0.00000604  | 0.00007789  | 0.00010651        | -0.00000229 | 0.00006581  | 0.00029764  |

**T2 (continued).** The values of electron density and its Hessian's eigenvalues of  $\rho_{total}$ ,  $\rho_{\sigma}$  and  $\rho_{\pi}$  in atomic units for  $C_4H_4SiH^+$ . The highlighted cells display the position of RCPs of  $\rho_{\pi}$ .

| R(Å)  | $\rho(r)_{\pi}$ |             |             |             | $\rho(r)_{\sigma}$ |             |             |             | $\rho(r)_{total}$ |             |             |             |
|-------|-----------------|-------------|-------------|-------------|--------------------|-------------|-------------|-------------|-------------------|-------------|-------------|-------------|
|       | $\rho$          | $\lambda_1$ | $\lambda_2$ | $\lambda_3$ | $\rho$             | $\lambda_1$ | $\lambda_2$ | $\lambda_3$ | $\rho$            | $\lambda_1$ | $\lambda_2$ | $\lambda_3$ |
| 5.00  | 0.00007545      | -0.00001576 | 0.00003939  | 0.00025733  | 0.00000726         | -0.00000088 | 0.00000114  | 0.00003735  | 0.00008595        | -0.00001008 | 0.00004414  | 0.00030077  |
| 4.00  | 0.00043837      | -0.00006396 | 0.00026890  | 0.00098881  | 0.00005958         | 0.00001890  | 0.00001961  | 0.00031653  | 0.00051841        | 0.00000288  | 0.00031632  | 0.00128809  |
| 3.00  | 0.00187997      | 0.00004946  | 0.00173202  | 0.00269529  | 0.00051137         | 0.00033167  | 0.00044246  | 0.00269048  | 0.00246802        | 0.00088991  | 0.00233665  | 0.00524558  |
| 2.50  | 0.00347400      | 0.00057263  | 0.00256634  | 0.00425949  | 0.00148975         | 0.00150104  | 0.00189645  | 0.00689170  | 0.00511547        | 0.00337083  | 0.00653593  | 0.00914946  |
| 2.00  | 0.00561814      | -0.00186260 | 0.00187806  | 0.00897371  | 0.00410693         | 0.00599699  | 0.00678875  | 0.01416023  | 0.01000338        | 0.00996248  | 0.01184462  | 0.01678346  |
| 1.75  | 0.00659694      | -0.00629207 | 0.00283917  | 0.01178987  | 0.00654505         | 0.01108137  | 0.01175445  | 0.01779180  | 0.01348684        | 0.010210039 | 0.016697339 | 0.02536755  |
| 1.50  | 0.00718073      | -0.01113407 | 0.00384551  | 0.01414949  | 0.01002841         | 0.01776041  | 0.01923784  | 0.02092135  | 0.01759933        | 0.00669501  | 0.02537961  | 0.03653318  |
| 1.40  | 0.00723658      | -0.01266616 | 0.00418631  | 0.01474805  | 0.01166639         | 0.01801070  | 0.02335141  | 0.02396155  | 0.01930038        | 0.00469462  | 0.02941444  | 0.04144341  |
| 1.25  | 0.00707884      | -0.01419419 | 0.00460628  | 0.01516766  | 0.01464597         | 0.01591862  | 0.03068718  | 0.03121480  | 0.02211841        | 0.00085564  | 0.03667902  | 0.04993562  |
| 1.00  | 0.00611429      | -0.01280695 | 0.00473660  | 0.01406619  | 0.02022629         | 0.00712763  | 0.04426084  | 0.04709057  | 0.02668389        | -0.00635073 | 0.05009354  | 0.06463457  |
| 0.75  | 0.00438137      | -0.00551987 | 0.00395594  | 0.01069627  | 0.02622614         | -0.00782253 | 0.05974500  | 0.06563040  | 0.03085364        | -0.01348486 | 0.06433818  | 0.07910688  |
| 0.50  | 0.00232691      | 0.00232627  | 0.00596897  | 0.00612332  | 0.03173231         | -0.02576987 | 0.07468674  | 0.08386699  | 0.03418937        | -0.01919888 | 0.07730902  | 0.09144509  |
| 0.25  | 0.00064878      | 0.00070946  | 0.00175192  | 0.01703129  | 0.03565287         | -0.04075533 | 0.08573689  | 0.09752698  | 0.03633776        | -0.02272775 | 0.08650241  | 0.09975232  |
| 0.00  | 0.00000000      | 0.00000000  | 0.00000176  | 0.02153824  | 0.03707842         | -0.04663108 | 0.08983793  | 0.10262904  | 0.03707842        | -0.02389645 | 0.08983793  | 0.10263053  |
| -0.25 | 0.00064878      | 0.00070946  | 0.00175192  | 0.01703129  | 0.03565287         | -0.04075533 | 0.08573689  | 0.09752698  | 0.03633776        | -0.02272775 | 0.08650241  | 0.09975232  |
| -0.50 | 0.00232691      | 0.00232627  | 0.00596897  | 0.00612332  | 0.03173231         | -0.02576987 | 0.07468674  | 0.08386699  | 0.03418937        | -0.01919888 | 0.07730902  | 0.09144509  |
| -0.75 | 0.00438137      | -0.00551987 | 0.00395594  | 0.01069627  | 0.02622614         | -0.00782253 | 0.05974500  | 0.06563040  | 0.03085364        | -0.01348486 | 0.06433818  | 0.07910688  |
| -1.00 | 0.00611429      | -0.01280695 | 0.00473660  | 0.01406619  | 0.02022629         | 0.00712763  | 0.04426084  | 0.04709057  | 0.02668389        | -0.00635073 | 0.05009354  | 0.06463457  |
| -1.25 | 0.00707884      | -0.01419419 | 0.00460628  | 0.01516766  | 0.01464597         | 0.01591862  | 0.03068718  | 0.03121480  | 0.02211841        | 0.00085564  | 0.03667902  | 0.04993562  |
| -1.40 | 0.00723658      | -0.01266616 | 0.00418631  | 0.01474805  | 0.01166639         | 0.01801070  | 0.02335141  | 0.02396155  | 0.01930038        | 0.00469462  | 0.02941444  | 0.04144341  |
| -1.50 | 0.00718073      | -0.01113407 | 0.00384551  | 0.01414949  | 0.01002841         | 0.01776041  | 0.01923784  | 0.02092135  | 0.01759933        | 0.00669501  | 0.02537961  | 0.03653318  |
| -1.75 | 0.00659694      | -0.00629207 | 0.00283917  | 0.01178987  | 0.00654505         | 0.01108137  | 0.01175445  | 0.01779180  | 0.01348684        | 0.010210039 | 0.016697339 | 0.02536755  |
| -2.00 | 0.00561814      | -0.00186260 | 0.00187806  | 0.00897371  | 0.00410693         | 0.00599699  | 0.00678875  | 0.01416023  | 0.01000338        | 0.00996248  | 0.01184462  | 0.01678346  |
| -2.50 | 0.00347400      | 0.00057263  | 0.00256634  | 0.00425949  | 0.00148975         | 0.00150104  | 0.00189645  | 0.00689170  | 0.00511547        | 0.00337083  | 0.00653593  | 0.00914946  |
| -3.00 | 0.00187997      | 0.00004946  | 0.00173202  | 0.00269529  | 0.00051137         | 0.00033167  | 0.00044246  | 0.00269048  | 0.00246802        | 0.00088991  | 0.00233665  | 0.00524558  |
| -4.00 | 0.00043837      | -0.00006396 | 0.00026890  | 0.00098881  | 0.00005958         | 0.00001890  | 0.00001961  | 0.00031653  | 0.00051841        | 0.00000288  | 0.00031632  | 0.00128809  |
| -5.00 | 0.00007545      | -0.00001576 | 0.00003939  | 0.00025733  | 0.00000726         | -0.00000088 | 0.00000114  | 0.00003735  | 0.00008595        | -0.00001008 | 0.00004414  | 0.00030077  |

**T2 (continued).** The values of electron density and its Hessian's eigenvalues of  $\rho_{total}$ ,  $\rho_{\sigma}$  and  $\rho_{\pi}$  in atomic units for  $C_4H_4SiH^-$ . The highlighted cells display the position of RCPs of  $\rho_{\pi}$ .

| R(Å)  | $\rho(r)_{\pi}$ |             |             |             | $\rho(r)_{\sigma}$ |             |             |             | $\rho(r)_{total}$ |             |             |             |
|-------|-----------------|-------------|-------------|-------------|--------------------|-------------|-------------|-------------|-------------------|-------------|-------------|-------------|
|       | $\rho$          | $\lambda_1$ | $\lambda_2$ | $\lambda_3$ | $\rho$             | $\lambda_1$ | $\lambda_2$ | $\lambda_3$ | $\rho$            | $\lambda_1$ | $\lambda_2$ | $\lambda_3$ |
| 5.00  | 0.00023114      | 0.00001584  | 0.00005149  | 0.00052818  | 0.00001203         | -0.00000244 | 0.00000083  | 0.00004501  | 0.00025911        | -0.00000421 | 0.00004817  | 0.00059940  |
| 4.00  | 0.00081692      | 0.00042497  | 0.00046174  | 0.00135236  | 0.00007344         | 0.00000676  | 0.00001804  | 0.00032160  | 0.00093408        | 0.00035923  | 0.00046782  | 0.00175331  |
| 3.00  | 0.00247212      | 0.00201250  | 0.00262216  | 0.00350655  | 0.00051969         | 0.00037004  | 0.00037778  | 0.00251475  | 0.00308304        | 0.00257098  | 0.00296199  | 0.00579450  |
| 2.50  | 0.00402676      | 0.00172558  | 0.00584139  | 0.00661174  | 0.00144907         | 0.00164206  | 0.00170545  | 0.00640821  | 0.00558772        | 0.00595124  | 0.00747344  | 0.01024544  |
| 2.00  | 0.00593386      | -0.00255824 | 0.01139410  | 0.01181264  | 0.00392786         | 0.00585166  | 0.00663726  | 0.01327539  | 0.00996707        | 0.00973860  | 0.01789203  | 0.01817471  |
| 1.70  | 0.00685236      | -0.00733814 | 0.01509193  | 0.01518733  | 0.00682323         | 0.01125997  | 0.01355133  | 0.01725208  | 0.01375544        | 0.00939766  | 0.02624468  | 0.02854373  |
| 1.46  | 0.00714263      | -0.01116907 | 0.01693272  | 0.01754150  | 0.01024816         | 0.01723782  | 0.01902831  | 0.02265893  | 0.01743988        | 0.00671864  | 0.03462323  | 0.03995739  |
| 1.30  | 0.00699909      | -0.01271476 | 0.01734614  | 0.01825765  | 0.01301488         | 0.01640281  | 0.02413443  | 0.03057178  | 0.02004139        | 0.00377263  | 0.04070981  | 0.04855978  |
| 1.15  | 0.00657451      | -0.01287607 | 0.01696713  | 0.01808965  | 0.01603269         | 0.01291956  | 0.03063506  | 0.03968669  | 0.02261529        | 0.00016381  | 0.04683109  | 0.05749045  |
| 1.00  | 0.00586485      | -0.01131811 | 0.01573339  | 0.01694620  | 0.01933779         | 0.00710852  | 0.03807784  | 0.05019728  | 0.02519504        | -0.00403423 | 0.05304886  | 0.06685637  |
| 0.75  | 0.00416181      | -0.00453598 | 0.01188523  | 0.01289923  | 0.02511108         | -0.00729574 | 0.05177274  | 0.06978407  | 0.02925194        | -0.01158957 | 0.06296967  | 0.08244050  |
| 0.50  | 0.00219712      | 0.00500753  | 0.00717060  | 0.00768114  | 0.03042164         | -0.02472247 | 0.06510871  | 0.08910220  | 0.03260122        | -0.01851123 | 0.07127057  | 0.09612873  |
| 0.25  | 0.00061067      | 0.00180857  | 0.00203827  | 0.01620112  | 0.03420934         | -0.03935063 | 0.07503839  | 0.10361205  | 0.03481397        | -0.02333738 | 0.07679760  | 0.10561140  |
| 0.00  | 0.00000000      | 0.00000000  | 0.00000061  | 0.02025326  | 0.03558782         | -0.04510192 | 0.07873675  | 0.10904056  | 0.03558782        | -0.02506235 | 0.07873675  | 0.10904096  |
| -0.25 | 0.00061067      | 0.00180857  | 0.00203827  | 0.01620112  | 0.03420934         | -0.03935063 | 0.07503839  | 0.10361205  | 0.03481397        | -0.02333738 | 0.07679760  | 0.10561140  |
| -0.50 | 0.00219712      | 0.00500753  | 0.00717060  | 0.00768114  | 0.03042164         | -0.02472247 | 0.06510871  | 0.08910220  | 0.03260122        | -0.01851123 | 0.07127057  | 0.09612873  |
| -0.75 | 0.00416181      | -0.00453598 | 0.01188523  | 0.01289923  | 0.02511108         | -0.00729574 | 0.05177274  | 0.06978407  | 0.02925194        | -0.01158957 | 0.06296967  | 0.08244050  |
| -1.00 | 0.00586485      | -0.01131811 | 0.01573339  | 0.01694620  | 0.01933779         | 0.00710852  | 0.03807784  | 0.05019728  | 0.02519504        | -0.00403423 | 0.05304886  | 0.06685637  |
| -1.15 | 0.00657451      | -0.01287607 | 0.01696713  | 0.01808965  | 0.01603269         | 0.01291956  | 0.03063506  | 0.03968669  | 0.02261529        | 0.00016381  | 0.04683109  | 0.05749045  |
| -1.30 | 0.00699909      | -0.01271476 | 0.01734614  | 0.01825765  | 0.01301488         | 0.01640281  | 0.02413443  | 0.03057178  | 0.02004139        | 0.00377263  | 0.04070981  | 0.04855978  |
| -1.46 | 0.00714263      | -0.01116907 | 0.01693272  | 0.01754150  | 0.01024816         | 0.01723782  | 0.01902831  | 0.02265893  | 0.01743988        | 0.00671864  | 0.03462323  | 0.03995739  |
| -1.70 | 0.00685236      | -0.00733814 | 0.01509193  | 0.01518733  | 0.00682323         | 0.01125997  | 0.01355133  | 0.01725208  | 0.01375544        | 0.00939766  | 0.02624468  | 0.02854373  |
| -2.00 | 0.00593386      | -0.00255824 | 0.01139410  | 0.01181264  | 0.00392786         | 0.00585166  | 0.00663726  | 0.01327539  | 0.00996707        | 0.00973860  | 0.01789203  | 0.01817471  |
| -2.50 | 0.00402676      | 0.00172558  | 0.00584139  | 0.00661174  | 0.00144907         | 0.00164206  | 0.00170545  | 0.00640821  | 0.00558772        | 0.00595124  | 0.00747344  | 0.01024544  |
| -3.00 | 0.00247212      | 0.00201250  | 0.00262216  | 0.00350655  | 0.00051969         | 0.00037004  | 0.00037778  | 0.00251475  | 0.00308304        | 0.00257098  | 0.00296199  | 0.00579450  |
| -4.00 | 0.00081692      | 0.00042497  | 0.00046174  | 0.00135236  | 0.00007344         | 0.00000676  | 0.00001804  | 0.00032160  | 0.00093408        | 0.00035923  | 0.00046782  | 0.00175331  |
| -5.00 | 0.00023114      | 0.00001584  | 0.00005149  | 0.00052818  | 0.00001203         | -0.00000244 | 0.00000083  | 0.00004501  | 0.00025911        | -0.00000421 | 0.00004817  | 0.00059940  |

**T2 (continued).** The values of electron density and its Hessian's eigenvalues of  $\rho_{total}$ ,  $\rho_{\sigma}$  and  $\rho_{\pi}$  in atomic units for  $C_4H_4NH$ . The highlighted cells display the position of RCPs of  $\rho_{\pi}$ .

| R(Å)  | $\rho(r)_{\pi}$ |             |             |             | $\rho(r)_{\sigma}$ |             |             |             | $\rho(r)_{total}$ |             |             |             |
|-------|-----------------|-------------|-------------|-------------|--------------------|-------------|-------------|-------------|-------------------|-------------|-------------|-------------|
|       | $\rho$          | $\lambda_1$ | $\lambda_2$ | $\lambda_3$ | $\rho$             | $\lambda_1$ | $\lambda_2$ | $\lambda_3$ | $\rho$            | $\lambda_1$ | $\lambda_2$ | $\lambda_3$ |
| 5.00  | 0.00006338      | 0.00001621  | 0.00006645  | 0.00023408  | 0.00000157         | -0.00000040 | 0.00000206  | 0.00001410  | 0.00006620        | 0.00001374  | 0.00006827  | 0.00025217  |
| 4.00  | 0.00037549      | 0.00020436  | 0.00039257  | 0.00098490  | 0.00002286         | 0.00000539  | 0.00002663  | 0.00013411  | 0.00040383        | 0.00019515  | 0.00041864  | 0.00113451  |
| 3.00  | 0.00178840      | 0.00179550  | 0.00257963  | 0.00385910  | 0.00025652         | 0.00021566  | 0.00037657  | 0.00173646  | 0.00206392        | 0.00192828  | 0.00295976  | 0.00567746  |
| 2.50  | 0.00365931      | 0.00454854  | 0.00617549  | 0.00674193  | 0.00092309         | 0.00115099  | 0.00164422  | 0.00625924  | 0.00461636        | 0.00596063  | 0.00840289  | 0.01210078  |
| 2.00  | 0.00672187      | 0.00127805  | 0.01387546  | 0.01537323  | 0.00326506         | 0.00574446  | 0.00674763  | 0.01778542  | 0.01003534        | 0.01632879  | 0.02198094  | 0.02217902  |
| 1.75  | 0.00844872      | -0.00509859 | 0.02033426  | 0.02123972  | 0.00587514         | 0.01202214  | 0.01287710  | 0.02596996  | 0.01437192        | 0.01991849  | 0.03269861  | 0.03420998  |
| 1.60  | 0.00935913      | -0.01030363 | 0.02459536  | 0.02488371  | 0.00817431         | 0.01818167  | 0.01855240  | 0.03065955  | 0.01757699        | 0.01972856  | 0.04267608  | 0.04353231  |
| 1.40  | 0.01019233      | -0.01776062 | 0.02908075  | 0.03006658  | 0.01230827         | 0.02936097  | 0.03013338  | 0.03510943  | 0.02253311        | 0.01663697  | 0.05860408  | 0.06000915  |
| 1.27  | 0.01037495      | -0.02202078 | 0.03109515  | 0.03286162  | 0.01581292         | 0.03444220  | 0.03911896  | 0.04230981  | 0.02621066        | 0.01262484  | 0.07040192  | 0.07401164  |
| 1.00  | 0.00953291      | -0.02470355 | 0.03151903  | 0.03443409  | 0.02460800         | 0.02452759  | 0.06595325  | 0.07380061  | 0.03414360        | -0.00007269 | 0.09769356  | 0.10720447  |
| 0.75  | 0.00721519      | -0.01534281 | 0.02598500  | 0.02901724  | 0.03436858         | -0.00103349 | 0.09950959  | 0.11364129  | 0.04157449        | -0.01622188 | 0.12572382  | 0.14173754  |
| 0.50  | 0.00400175      | 0.00538888  | 0.01542659  | 0.01775390  | 0.04400290         | -0.03870688 | 0.13630256  | 0.15721827  | 0.04799460        | -0.03303812 | 0.15193089  | 0.17414955  |
| 0.25  | 0.00114749      | 0.00451574  | 0.00538384  | 0.02850068  | 0.05123215         | -0.07423796 | 0.16616493  | 0.19246802  | 0.05237586        | -0.04587633 | 0.17086548  | 0.19761437  |
| 0.00  | 0.00000000      | 0.00000000  | 0.00004271  | 0.03846645  | 0.05393422         | -0.08901782 | 0.17780081  | 0.20617805  | 0.05393422        | -0.05068838 | 0.17780081  | 0.20622090  |
| -0.25 | 0.00114749      | 0.00451574  | 0.00538384  | 0.02850068  | 0.05123215         | -0.07423796 | 0.16616493  | 0.19246802  | 0.05237586        | -0.04587633 | 0.17086548  | 0.19761437  |
| -0.50 | 0.00400175      | 0.00538888  | 0.01542659  | 0.01775390  | 0.04400290         | -0.03870688 | 0.13630256  | 0.15721827  | 0.04799460        | -0.03303812 | 0.15193089  | 0.17414955  |
| -0.75 | 0.00721519      | -0.01534281 | 0.02598500  | 0.02901724  | 0.03436858         | -0.00103349 | 0.09950959  | 0.11364129  | 0.04157449        | -0.01622188 | 0.12572382  | 0.14173754  |
| -1.00 | 0.00953291      | -0.02470355 | 0.03151903  | 0.03443409  | 0.02460800         | 0.02452759  | 0.06595325  | 0.07380061  | 0.03414360        | -0.00007269 | 0.09769356  | 0.10720447  |
| -1.27 | 0.01037495      | -0.02202078 | 0.03109515  | 0.03286162  | 0.01581292         | 0.03444220  | 0.03911896  | 0.04230981  | 0.02621066        | 0.01262484  | 0.07040192  | 0.07401164  |
| -1.40 | 0.01019233      | -0.01776062 | 0.02908075  | 0.03006658  | 0.01230827         | 0.02936097  | 0.03013338  | 0.03510943  | 0.02253311        | 0.01663697  | 0.05860408  | 0.06000915  |
| -1.60 | 0.00935913      | -0.01030363 | 0.02459536  | 0.02488371  | 0.00817431         | 0.01818167  | 0.01855240  | 0.03065955  | 0.01757699        | 0.01972856  | 0.04267608  | 0.04353231  |
| -1.75 | 0.00844872      | -0.00509859 | 0.02033426  | 0.02123972  | 0.00587514         | 0.01202214  | 0.01287710  | 0.02596996  | 0.01437192        | 0.01991849  | 0.03269861  | 0.03420998  |
| -2.00 | 0.00672187      | 0.00127805  | 0.01387546  | 0.01537323  | 0.00326506         | 0.00574446  | 0.00674763  | 0.01778542  | 0.01003534        | 0.01632879  | 0.02198094  | 0.02217902  |
| -2.50 | 0.00365931      | 0.00454854  | 0.00617549  | 0.00674193  | 0.00092309         | 0.00115099  | 0.00164422  | 0.00625924  | 0.00461636        | 0.00596063  | 0.00840289  | 0.01210078  |
| -3.00 | 0.00178840      | 0.00179550  | 0.00257963  | 0.00385910  | 0.00025652         | 0.00021566  | 0.00037657  | 0.00173646  | 0.00206392        | 0.00192828  | 0.00295976  | 0.00567746  |
| -4.00 | 0.00037549      | 0.00020436  | 0.00039257  | 0.00098490  | 0.00002286         | 0.00000539  | 0.00002663  | 0.00013411  | 0.00040383        | 0.00019515  | 0.00041864  | 0.00113451  |
| -5.00 | 0.00006338      | 0.00001621  | 0.00006645  | 0.00023408  | 0.00000157         | -0.00000040 | 0.00000206  | 0.00001410  | 0.00006620        | 0.00001374  | 0.00006827  | 0.00025217  |

**T2 (continued).** The values of electron density and its Hessian's eigenvalues of  $\rho_{total}$ ,  $\rho_{\sigma}$  and  $\rho_{\pi}$  in atomic units for  $C_4H_4PH$ . The highlighted cells display the position of RCPs of  $\rho_{\pi}$ .

| R(Å)  | $\rho(r)_{\pi}$ |             |             |             | $\rho(r)_{\sigma}$ |             |             |             | $\rho(r)_{total}$ |             |             |             |
|-------|-----------------|-------------|-------------|-------------|--------------------|-------------|-------------|-------------|-------------------|-------------|-------------|-------------|
|       | $\rho$          | $\lambda_1$ | $\lambda_2$ | $\lambda_3$ | $\rho$             | $\lambda_1$ | $\lambda_2$ | $\lambda_3$ | $\rho$            | $\lambda_1$ | $\lambda_2$ | $\lambda_3$ |
| 5.00  | 0.00009559      | 0.00005271  | 0.00007690  | 0.00029824  | 0.00000311         | 0.00000131  | 0.00000272  | 0.00002196  | 0.00010064        | 0.00005331  | 0.00007618  | 0.00032685  |
| 4.00  | 0.00048748      | 0.00032940  | 0.00044440  | 0.00109414  | 0.00003625         | 0.00001855  | 0.00003523  | 0.00020368  | 0.00053062        | 0.00034481  | 0.00046496  | 0.00132686  |
| 3.00  | 0.00200858      | 0.00210940  | 0.00249609  | 0.00357056  | 0.00036610         | 0.00032185  | 0.00050798  | 0.00212545  | 0.00239666        | 0.00241325  | 0.00303698  | 0.00571416  |
| 2.50  | 0.00375793      | 0.00326724  | 0.00532411  | 0.00688262  | 0.00117654         | 0.00147734  | 0.00205038  | 0.00631030  | 0.00496784        | 0.00675848  | 0.00762589  | 0.01094580  |
| 2.00  | 0.00622986      | -0.00141631 | 0.01163557  | 0.01366592  | 0.00360995         | 0.00607930  | 0.00736009  | 0.01486033  | 0.00987834        | 0.01285072  | 0.01762391  | 0.02168627  |
| 1.75  | 0.00742134      | -0.00659364 | 0.01563242  | 0.01772894  | 0.00604933         | 0.01144528  | 0.01302919  | 0.01981980  | 0.01350607        | 0.01286053  | 0.02695443  | 0.03120272  |
| 1.50  | 0.00819838      | -0.01257451 | 0.01925038  | 0.02123103  | 0.00970075         | 0.02029415  | 0.02148122  | 0.02342918  | 0.01792707        | 0.01010845  | 0.03938874  | 0.04355272  |
| 1.37  | 0.00831713      | -0.01518330 | 0.02056714  | 0.02242225  | 0.01212317         | 0.02259189  | 0.02658190  | 0.02845069  | 0.02046310        | 0.00747756  | 0.04698004  | 0.05090300  |
| 1.25  | 0.00820130      | -0.01680563 | 0.02123996  | 0.02294617  | 0.01474509         | 0.02105569  | 0.03371085  | 0.03528917  | 0.02296390        | 0.00426624  | 0.05477448  | 0.05831786  |
| 1.00  | 0.00718329      | -0.01590012 | 0.02028753  | 0.02164405  | 0.02106467         | 0.01167327  | 0.05213544  | 0.05283415  | 0.02825495        | -0.00419419 | 0.07225406  | 0.07452466  |
| 0.75  | 0.00521193      | -0.00762735 | 0.01580597  | 0.01684584  | 0.02806946         | -0.00631399 | 0.07372636  | 0.07443220  | 0.03328113        | -0.01388308 | 0.08996535  | 0.09069740  |
| 0.50  | 0.00279579      | 0.00634236  | 0.00893031  | 0.00976381  | 0.03465525         | -0.02935994 | 0.09466484  | 0.09706894  | 0.03744859        | -0.02281776 | 0.10405641  | 0.10609817  |
| 0.25  | 0.00078459      | 0.00248565  | 0.00290432  | 0.02033841  | 0.03942461         | -0.04936257 | 0.11057665  | 0.11442863  | 0.04020808        | -0.02905910 | 0.11332115  | 0.11705612  |
| 0.00  | 0.00000000      | 0.00000000  | 0.00002712  | 0.02610574  | 0.04117402         | -0.05735291 | 0.11656577  | 0.12099412  | 0.04117402        | -0.03128930 | 0.11659139  | 0.12099412  |
| -0.25 | 0.00078459      | 0.00248565  | 0.00290432  | 0.02033841  | 0.03942461         | -0.04936257 | 0.11057665  | 0.11442863  | 0.04020808        | -0.02905910 | 0.11332115  | 0.11705612  |
| -0.50 | 0.00279579      | 0.00634236  | 0.00893031  | 0.00976381  | 0.03465525         | -0.02935994 | 0.09466484  | 0.09706894  | 0.03744859        | -0.02281776 | 0.10405641  | 0.10609817  |
| -0.75 | 0.00521193      | -0.00762735 | 0.01580597  | 0.01684584  | 0.02806946         | -0.00631399 | 0.07372636  | 0.07443220  | 0.03328113        | -0.01388308 | 0.08996535  | 0.09069740  |
| -1.00 | 0.00718329      | -0.01590012 | 0.02028753  | 0.02164405  | 0.02106467         | 0.01167327  | 0.05213544  | 0.05283415  | 0.02825495        | -0.00419419 | 0.07225406  | 0.07452466  |
| -1.25 | 0.00820130      | -0.01680563 | 0.02123996  | 0.02294617  | 0.01474509         | 0.02105569  | 0.03371085  | 0.03528917  | 0.02296390        | 0.00426624  | 0.05477448  | 0.05831786  |
| -1.37 | 0.00831713      | -0.01518330 | 0.02056714  | 0.02242225  | 0.01212317         | 0.02259189  | 0.02658190  | 0.02845069  | 0.02046310        | 0.00747756  | 0.04698004  | 0.05090300  |
| -1.50 | 0.00819838      | -0.01257451 | 0.01925038  | 0.02123103  | 0.00970075         | 0.02029415  | 0.02148122  | 0.02342918  | 0.01792707        | 0.01010845  | 0.03938874  | 0.04355272  |
| -1.75 | 0.00742134      | -0.00659364 | 0.01563242  | 0.01772894  | 0.00604933         | 0.01144528  | 0.01302919  | 0.01981980  | 0.01350607        | 0.01286053  | 0.02695443  | 0.03120272  |
| -2.00 | 0.00622986      | -0.00141631 | 0.01163557  | 0.01366592  | 0.00360995         | 0.00607930  | 0.00736009  | 0.01486033  | 0.00987834        | 0.01285072  | 0.01762391  | 0.02168627  |
| -2.50 | 0.00375793      | 0.00326724  | 0.00532411  | 0.00688262  | 0.00117654         | 0.00147734  | 0.00205038  | 0.00631030  | 0.00496784        | 0.00675848  | 0.00762589  | 0.01094580  |
| -3.00 | 0.00200858      | 0.00210940  | 0.00249609  | 0.00357056  | 0.00036610         | 0.00032185  | 0.00050798  | 0.00212545  | 0.00239666        | 0.00241325  | 0.00303698  | 0.00571416  |
| -4.00 | 0.00048748      | 0.00032940  | 0.00044440  | 0.00109414  | 0.00003625         | 0.00001855  | 0.00003523  | 0.00020368  | 0.00053062        | 0.00034481  | 0.00046496  | 0.00132686  |
| -5.00 | 0.00009559      | 0.00005271  | 0.00007690  | 0.00029824  | 0.00000311         | 0.00000131  | 0.00000272  | 0.00002196  | 0.00010064        | 0.00005331  | 0.00007618  | 0.00032685  |

**T2 (continued).** The values of electron density and its Hessian's eigenvalues of  $\rho_{total}$ ,  $\rho_{\sigma}$  and  $\rho_{\pi}$  in atomic units for  $C_4H_4O$ . The highlighted cells display the position of RCPs of  $\rho_{\pi}$ .

| R(Å)  | $\rho(r)_{\pi}$ |             |             |             | $\rho(r)_{\sigma}$ |             |             |             | $\rho(r)_{total}$ |             |             |             |
|-------|-----------------|-------------|-------------|-------------|--------------------|-------------|-------------|-------------|-------------------|-------------|-------------|-------------|
|       | $\rho$          | $\lambda_1$ | $\lambda_2$ | $\lambda_3$ | $\rho$             | $\lambda_1$ | $\lambda_2$ | $\lambda_3$ | $\rho$            | $\lambda_1$ | $\lambda_2$ | $\lambda_3$ |
| 5.00  | 0.00005925      | -0.00000700 | 0.00006266  | 0.00022601  | 0.00000209         | -0.00000080 | 0.00000178  | 0.00001439  | 0.00006499        | -0.00001107 | 0.00006399  | 0.00025152  |
| 4.00  | 0.00035035      | 0.00007245  | 0.00038695  | 0.00097458  | 0.00002408         | -0.00000501 | 0.00002499  | 0.00013682  | 0.00039281        | 0.00003381  | 0.00041110  | 0.00115516  |
| 3.00  | 0.00170988      | 0.00137554  | 0.00265238  | 0.00394092  | 0.00025899         | 0.00008263  | 0.00037091  | 0.00178174  | 0.00203478        | 0.00122454  | 0.00304403  | 0.00596686  |
| 2.50  | 0.00356460      | 0.00384579  | 0.00598680  | 0.00707569  | 0.00092978         | 0.00063302  | 0.00164490  | 0.00638219  | 0.00461267        | 0.00403581  | 0.00879715  | 0.01271025  |
| 2.00  | 0.00662991      | 0.00148411  | 0.01177629  | 0.01641541  | 0.00327804         | 0.00386680  | 0.00683465  | 0.01817443  | 0.01009070        | 0.01188761  | 0.02251027  | 0.02347591  |
| 1.80  | 0.00803524      | -0.00320068 | 0.01645996  | 0.02151030  | 0.00525856         | 0.00757050  | 0.01155690  | 0.02499396  | 0.01348971        | 0.01660246  | 0.02767104  | 0.03338942  |
| 1.60  | 0.00930748      | -0.00988072 | 0.02212068  | 0.02685721  | 0.00820268         | 0.01423442  | 0.01897019  | 0.03185581  | 0.01770043        | 0.01920163  | 0.03681646  | 0.04625865  |
| 1.40  | 0.01018715      | -0.01750124 | 0.02800333  | 0.03167075  | 0.01237193         | 0.02536667  | 0.03019076  | 0.03692612  | 0.02272010        | 0.01763787  | 0.05213940  | 0.06239207  |
| 1.25  | 0.01041205      | -0.02244840 | 0.03168098  | 0.03422111  | 0.01634918         | 0.03480610  | 0.04053470  | 0.04164965  | 0.02688676        | 0.01374570  | 0.06745670  | 0.07644908  |
| 1.15  | 0.01029126      | -0.02478832 | 0.03345995  | 0.03516190  | 0.01956874         | 0.03426485  | 0.05021569  | 0.05145105  | 0.02995642        | 0.00968235  | 0.07998629  | 0.08720338  |
| 1.00  | 0.00964859      | -0.02548781 | 0.03432366  | 0.03488332  | 0.02492153         | 0.02703811  | 0.06875845  | 0.07017882  | 0.03462245        | 0.00179423  | 0.10084281  | 0.10421074  |
| 0.75  | 0.00736489      | -0.01656361 | 0.02909834  | 0.02984054  | 0.03502423         | 0.00064875  | 0.10471653  | 0.11326081  | 0.04238360        | -0.01542605 | 0.13425283  | 0.13987773  |
| 0.50  | 0.00411511      | 0.00442628  | 0.01749964  | 0.01892735  | 0.04510416         | -0.03960298 | 0.14461782  | 0.16168477  | 0.04919553        | -0.03433194 | 0.16235319  | 0.17809502  |
| 0.25  | 0.00118594      | 0.00528319  | 0.00542591  | 0.02934999  | 0.05272965         | -0.07822345 | 0.17729201  | 0.20137160  | 0.05390488        | -0.04927951 | 0.18264554  | 0.20643365  |
| 0.00  | 0.00000000      | 0.00000000  | 0.00000153  | 0.03982653  | 0.05559221         | -0.09441138 | 0.19008342  | 0.21688582  | 0.05559221        | -0.05499001 | 0.19008371  | 0.21688870  |
| -0.25 | 0.00118594      | 0.00528319  | 0.00542591  | 0.02934999  | 0.05272965         | -0.07822345 | 0.17729201  | 0.20137160  | 0.05390488        | -0.04927951 | 0.18264554  | 0.20643365  |
| -0.50 | 0.00411511      | 0.00442628  | 0.01749964  | 0.01892735  | 0.04510416         | -0.03960298 | 0.14461782  | 0.16168477  | 0.04919553        | -0.03433194 | 0.16235319  | 0.17809502  |
| -0.75 | 0.00736489      | -0.01656361 | 0.02909834  | 0.02984054  | 0.03502423         | 0.00064875  | 0.10471653  | 0.11326081  | 0.04238360        | -0.01542605 | 0.13425283  | 0.13987773  |
| -1.00 | 0.00964859      | -0.02548781 | 0.03432366  | 0.03488332  | 0.02492153         | 0.02703811  | 0.06875845  | 0.07017882  | 0.03462245        | 0.00179423  | 0.10084281  | 0.10421074  |
| -1.15 | 0.01029126      | -0.02478832 | 0.03345995  | 0.03516190  | 0.01956874         | 0.03426485  | 0.05021569  | 0.05145105  | 0.02995642        | 0.00968235  | 0.07998629  | 0.08720338  |
| -1.25 | 0.01041205      | -0.02244840 | 0.03168098  | 0.03422111  | 0.01634918         | 0.03480610  | 0.04053470  | 0.04164965  | 0.02688676        | 0.01374570  | 0.06745670  | 0.07644908  |
| -1.40 | 0.01018715      | -0.01750124 | 0.02800333  | 0.03167075  | 0.01237193         | 0.02536667  | 0.03019076  | 0.03692612  | 0.02272010        | 0.01763787  | 0.05213940  | 0.06239207  |
| -1.60 | 0.00930748      | -0.00988072 | 0.02212068  | 0.02685721  | 0.00820268         | 0.01423442  | 0.01897019  | 0.03185581  | 0.01770043        | 0.01920163  | 0.03681646  | 0.04625865  |
| -1.80 | 0.00803524      | -0.00320068 | 0.01645996  | 0.02151030  | 0.00525856         | 0.00757050  | 0.01155690  | 0.02499396  | 0.01348971        | 0.01660246  | 0.02767104  | 0.03338942  |
| -2.00 | 0.00662991      | 0.00148411  | 0.01177629  | 0.01641541  | 0.00327804         | 0.00386680  | 0.00683465  | 0.01817443  | 0.01009070        | 0.01188761  | 0.02251027  | 0.02347591  |
| -2.50 | 0.00356460      | 0.00384579  | 0.00598680  | 0.00707569  | 0.00092978         | 0.00063302  | 0.00164490  | 0.00638219  | 0.00461267        | 0.00403581  | 0.00879715  | 0.01271025  |
| -3.00 | 0.00170988      | 0.00137554  | 0.00265238  | 0.00394092  | 0.00025899         | 0.00008263  | 0.00037091  | 0.00178174  | 0.00203478        | 0.00122454  | 0.00304403  | 0.00596686  |
| -4.00 | 0.00035035      | 0.00007245  | 0.00038695  | 0.00097458  | 0.00002408         | -0.00000501 | 0.00002499  | 0.00013682  | 0.00039281        | 0.00003381  | 0.00041110  | 0.00115516  |
| -5.00 | 0.00005925      | -0.00000700 | 0.00006266  | 0.00022601  | 0.00000209         | -0.00000080 | 0.00000178  | 0.00001439  | 0.00006499        | -0.00001107 | 0.00006399  | 0.00025152  |

**T2 (continued).** The values of electron density and its Hessian's eigenvalues of  $\rho_{total}$ ,  $\rho_\sigma$  and  $\rho_\pi$  in atomic units for  $C_4H_4S$ . The highlighted cells display the position of RCPs of  $\rho_\pi$ .

| R(Å)  | $\rho(r)_\pi$ |             |             |             | $\rho(r)_\sigma$ |             |             |             | $\rho(r)_{total}$ |             |             |             |
|-------|---------------|-------------|-------------|-------------|------------------|-------------|-------------|-------------|-------------------|-------------|-------------|-------------|
|       | $\rho$        | $\lambda_1$ | $\lambda_2$ | $\lambda_3$ | $\rho$           | $\lambda_1$ | $\lambda_2$ | $\lambda_3$ | $\rho$            | $\lambda_1$ | $\lambda_2$ | $\lambda_3$ |
| 5.00  | 0.00007404    | 0.00005387  | 0.00006464  | 0.00023858  | 0.00000181       | 0.00000173  | 0.00000188  | 0.00001376  | 0.00000181        | 0.00000173  | 0.00000188  | 0.00001376  |
| 4.00  | 0.00041080    | 0.00033654  | 0.00038403  | 0.00091726  | 0.00002521       | 0.00002207  | 0.00002238  | 0.00015233  | 0.00002521        | 0.00002207  | 0.00002238  | 0.00015233  |
| 3.00  | 0.00178379    | 0.00224043  | 0.00235987  | 0.00312937  | 0.00030161       | 0.00034095  | 0.00036385  | 0.00193425  | 0.00030161        | 0.00034095  | 0.00036385  | 0.00193425  |
| 2.50  | 0.00343702    | 0.00348576  | 0.00578378  | 0.00591469  | 0.00105562       | 0.00154127  | 0.00163022  | 0.00620111  | 0.00105562        | 0.00154127  | 0.00163022  | 0.00620111  |
| 2.00  | 0.00586304    | -0.00095718 | 0.01218159  | 0.01289437  | 0.00345758       | 0.00637952  | 0.00650504  | 0.01526767  | 0.00345758        | 0.00637952  | 0.00650504  | 0.01526767  |
| 1.75  | 0.00706994    | -0.00610375 | 0.01598665  | 0.01749113  | 0.00592927       | 0.01208781  | 0.01208957  | 0.02062264  | 0.00592927        | 0.01208781  | 0.01208957  | 0.02062264  |
| 1.50  | 0.00789085    | -0.01217230 | 0.01931170  | 0.02176666  | 0.00967570       | 0.02116398  | 0.02163420  | 0.02423517  | 0.00967570        | 0.02116398  | 0.02163420  | 0.02423517  |
| 1.35  | 0.00804406    | -0.01518989 | 0.02057944  | 0.02357576  | 0.01255875       | 0.02397975  | 0.02893148  | 0.02957991  | 0.01255875        | 0.02397975  | 0.02893148  | 0.02957991  |
| 1.15  | 0.00771111    | -0.01714849 | 0.02092477  | 0.02449385  | 0.01739463       | 0.01990385  | 0.04231389  | 0.04395629  | 0.01739463        | 0.01990385  | 0.04231389  | 0.04395629  |
| 1.00  | 0.00701886    | -0.01597526 | 0.01984390  | 0.02358792  | 0.02149503       | 0.01302460  | 0.05444955  | 0.05711493  | 0.02149503        | 0.01302460  | 0.05444955  | 0.05711493  |
| 0.75  | 0.00511900    | -0.00792983 | 0.01539394  | 0.01875152  | 0.02885455       | -0.00589689 | 0.07781206  | 0.08285123  | 0.02885455        | -0.00589689 | 0.07781206  | 0.08285123  |
| 0.50  | 0.00275621    | 0.00604017  | 0.00878183  | 0.01086268  | 0.03581469       | -0.03060435 | 0.10163830  | 0.10959440  | 0.03581469        | -0.03060435 | 0.10163830  | 0.10959440  |
| 0.25  | 0.00077526    | 0.00251848  | 0.00325947  | 0.01998905  | 0.04087808       | -0.05233804 | 0.11996096  | 0.13046522  | 0.04087808        | -0.05233804 | 0.11996096  | 0.13046522  |
| 0.00  | 0.00000000    | 0.00000000  | 0.00000269  | 0.02581503  | 0.04274000       | -0.06108180 | 0.12689926  | 0.13843254  | 0.04274000        | -0.06108180 | 0.12689926  | 0.13843254  |
| -0.25 | 0.00077526    | 0.00251848  | 0.00325947  | 0.01998905  | 0.04087808       | -0.05233804 | 0.11996096  | 0.13046522  | 0.04087808        | -0.05233804 | 0.11996096  | 0.13046522  |
| -0.50 | 0.00275621    | 0.00604017  | 0.00878183  | 0.01086268  | 0.03581469       | -0.03060435 | 0.10163830  | 0.10959440  | 0.03581469        | -0.03060435 | 0.10163830  | 0.10959440  |
| -0.75 | 0.00511900    | -0.00792983 | 0.01539394  | 0.01875152  | 0.02885455       | -0.00589689 | 0.07781206  | 0.08285123  | 0.02885455        | -0.00589689 | 0.07781206  | 0.08285123  |
| -1.00 | 0.00701886    | -0.01597526 | 0.01984390  | 0.02358792  | 0.02149503       | 0.01302460  | 0.05444955  | 0.05711493  | 0.02149503        | 0.01302460  | 0.05444955  | 0.05711493  |
| -1.15 | 0.00771111    | -0.01714849 | 0.02092477  | 0.02449385  | 0.01739463       | 0.01990385  | 0.04231389  | 0.04395629  | 0.01739463        | 0.01990385  | 0.04231389  | 0.04395629  |
| -1.35 | 0.00804406    | -0.01518989 | 0.02057944  | 0.02357576  | 0.01255875       | 0.02397975  | 0.02893148  | 0.02957991  | 0.01255875        | 0.02397975  | 0.02893148  | 0.02957991  |
| -1.50 | 0.00789085    | -0.01217230 | 0.01931170  | 0.02176666  | 0.00967570       | 0.02116398  | 0.02163420  | 0.02423517  | 0.00967570        | 0.02116398  | 0.02163420  | 0.02423517  |
| -1.75 | 0.00706994    | -0.00610375 | 0.01598665  | 0.01749113  | 0.00592927       | 0.01208781  | 0.01208957  | 0.02062264  | 0.00592927        | 0.01208781  | 0.01208957  | 0.02062264  |
| -2.00 | 0.00586304    | -0.00095718 | 0.01218159  | 0.01289437  | 0.00345758       | 0.00637952  | 0.00650504  | 0.01526767  | 0.00345758        | 0.00637952  | 0.00650504  | 0.01526767  |
| -2.50 | 0.00343702    | 0.00348576  | 0.00578378  | 0.00591469  | 0.00105562       | 0.00154127  | 0.00163022  | 0.00620111  | 0.00105562        | 0.00154127  | 0.00163022  | 0.00620111  |
| -3.00 | 0.00178379    | 0.00224043  | 0.00235987  | 0.00312937  | 0.00030161       | 0.00034095  | 0.00036385  | 0.00193425  | 0.00030161        | 0.00034095  | 0.00036385  | 0.00193425  |
| -4.00 | 0.00041080    | 0.00033654  | 0.00038403  | 0.00091726  | 0.00002521       | 0.00002207  | 0.00002238  | 0.00015233  | 0.00002521        | 0.00002207  | 0.00002238  | 0.00015233  |
| -5.00 | 0.00007404    | 0.00005387  | 0.00006464  | 0.00023858  | 0.00000181       | 0.00000173  | 0.00000188  | 0.00001376  | 0.00000181        | 0.00000173  | 0.00000188  | 0.00001376  |



**T2 (continued).** The values of electron density and its Hessian's eigenvalues of  $\rho_{total}$ ,  $\rho_{\sigma}$  and  $\rho_{\pi}$  in atomic units for  $C_5H_5BH^-$ . The highlighted cells display the position of RCPs of  $\rho_{\pi}$ .

| R(Å)  | $\rho(r)_{\pi}$ |             |             |             | $\rho(r)_{\sigma}$ |             |             |             | $\rho(r)_{total}$ |             |             |             |
|-------|-----------------|-------------|-------------|-------------|--------------------|-------------|-------------|-------------|-------------------|-------------|-------------|-------------|
|       | $\rho$          | $\lambda_1$ | $\lambda_2$ | $\lambda_3$ | $\rho$             | $\lambda_1$ | $\lambda_2$ | $\lambda_3$ | $\rho$            | $\lambda_1$ | $\lambda_2$ | $\lambda_3$ |
| 5.00  | 0.00011159      | 0.00005961  | 0.00007356  | 0.00024212  | 0.00000456         | 0.00000073  | 0.00000235  | 0.00002755  | 0.00011637        | 0.00006149  | 0.00007428  | 0.00027011  |
| 4.00  | 0.00044132      | 0.00032013  | 0.00038618  | 0.00070970  | 0.00004405         | 0.00001891  | 0.00003078  | 0.00020234  | 0.00048595        | 0.00035090  | 0.00040509  | 0.00091178  |
| 3.00  | 0.00144871      | 0.00120571  | 0.00188571  | 0.00196365  | 0.00034700         | 0.00031820  | 0.00039695  | 0.00149147  | 0.00179706        | 0.00194987  | 0.00228205  | 0.00302616  |
| 2.50  | 0.00238176      | 0.00084112  | 0.00376727  | 0.00433715  | 0.00095139         | 0.00131062  | 0.00147852  | 0.00379477  | 0.00333480        | 0.00419991  | 0.00564828  | 0.00567064  |
| 2.00  | 0.00347949      | -0.00175056 | 0.00692746  | 0.00840103  | 0.00250918         | 0.00488276  | 0.00499040  | 0.00783598  | 0.00598996        | 0.00587441  | 0.01210663  | 0.01328458  |
| 1.80  | 0.00384078      | -0.00348718 | 0.00831834  | 0.01024435  | 0.00360630         | 0.00769180  | 0.00785750  | 0.00953525  | 0.00744796        | 0.00577184  | 0.01626028  | 0.01810260  |
| 1.49  | 0.00410060      | -0.00620076 | 0.01000497  | 0.01253972  | 0.00607042         | 0.01028565  | 0.01479031  | 0.01533935  | 0.01017110        | 0.00413141  | 0.02471977  | 0.02787946  |
| 1.30  | 0.00398520      | -0.00711065 | 0.01036754  | 0.01308269  | 0.00802686         | 0.00924875  | 0.02051940  | 0.02184176  | 0.01201167        | 0.00214702  | 0.03084970  | 0.03492445  |
| 1.15  | 0.00371607      | -0.00702354 | 0.01013376  | 0.01283344  | 0.00982490         | 0.00707562  | 0.02605648  | 0.02815916  | 0.01354029        | 0.00005672  | 0.03615916  | 0.04099226  |
| 1.00  | 0.00329090      | -0.00599033 | 0.00937104  | 0.01189176  | 0.01177988         | 0.00360315  | 0.03231650  | 0.03534762  | 0.01506993        | -0.00238015 | 0.04165689  | 0.04723875  |
| 0.75  | 0.00230887      | -0.00207296 | 0.00700543  | 0.00888520  | 0.01516336         | -0.00474180 | 0.04367551  | 0.04848255  | 0.01747138        | -0.00679431 | 0.05064285  | 0.05736688  |
| 0.50  | 0.00120751      | 0.00333379  | 0.00418641  | 0.00486255  | 0.01824399         | -0.01457099 | 0.05454875  | 0.06113214  | 0.01945096        | -0.01087943 | 0.05836576  | 0.06599402  |
| 0.25  | 0.00033353      | 0.00107955  | 0.00137337  | 0.00892659  | 0.02042422         | -0.02266979 | 0.06253120  | 0.07045343  | 0.02075758        | -0.01375638 | 0.06361669  | 0.07182657  |
| 0.00  | 0.00000000      | 0.00000000  | 0.00000014  | 0.01103750  | 0.02121434         | -0.02582312 | 0.06548085  | 0.07390404  | 0.02121434        | -0.01479127 | 0.06548085  | 0.07390418  |
| -0.25 | 0.00033353      | 0.00107955  | 0.00137337  | 0.00892659  | 0.02042422         | -0.02266979 | 0.06253120  | 0.07045343  | 0.02075758        | -0.01375638 | 0.06361669  | 0.07182657  |
| -0.50 | 0.00120751      | 0.00333379  | 0.00418641  | 0.00486255  | 0.01824399         | -0.01457099 | 0.05454875  | 0.06113214  | 0.01945096        | -0.01087943 | 0.05836576  | 0.06599402  |
| -0.75 | 0.00230887      | -0.00207296 | 0.00700543  | 0.00888520  | 0.01516336         | -0.00474180 | 0.04367551  | 0.04848255  | 0.01747138        | -0.00679431 | 0.05064285  | 0.05736688  |
| -1.00 | 0.00329090      | -0.00599033 | 0.00937104  | 0.01189176  | 0.01177988         | 0.00360315  | 0.03231650  | 0.03534762  | 0.01506993        | -0.00238015 | 0.04165689  | 0.04723875  |
| -1.15 | 0.00371607      | -0.00702354 | 0.01013376  | 0.01283344  | 0.00982490         | 0.00707562  | 0.02605648  | 0.02815916  | 0.01354029        | 0.00005672  | 0.03615916  | 0.04099226  |
| -1.30 | 0.00398520      | -0.00711065 | 0.01036754  | 0.01308269  | 0.00802686         | 0.00924875  | 0.02051940  | 0.02184176  | 0.01201167        | 0.00214702  | 0.03084970  | 0.03492445  |
| -1.49 | 0.00410060      | -0.00620076 | 0.01000497  | 0.01253972  | 0.00607042         | 0.01028565  | 0.01479031  | 0.01533935  | 0.01017110        | 0.00413141  | 0.02471977  | 0.02787946  |
| -1.80 | 0.00384078      | -0.00348718 | 0.00831834  | 0.01024435  | 0.00360630         | 0.00769180  | 0.00785750  | 0.00953525  | 0.00744796        | 0.00577184  | 0.01626028  | 0.01810260  |
| -2.00 | 0.00347949      | -0.00175056 | 0.00692746  | 0.00840103  | 0.00250918         | 0.00488276  | 0.00499040  | 0.00783598  | 0.00598996        | 0.00587441  | 0.01210663  | 0.01328458  |
| -2.50 | 0.00238176      | 0.00084112  | 0.00376727  | 0.00433715  | 0.00095139         | 0.00131062  | 0.00147852  | 0.00379477  | 0.00333480        | 0.00419991  | 0.00564828  | 0.00567064  |
| -3.00 | 0.00144871      | 0.00120571  | 0.00188571  | 0.00196365  | 0.00034700         | 0.00031820  | 0.00039695  | 0.00149147  | 0.00179706        | 0.00194987  | 0.00228205  | 0.00302616  |
| -4.00 | 0.00044132      | 0.00032013  | 0.00038618  | 0.00070970  | 0.00004405         | 0.00001891  | 0.00003078  | 0.00020234  | 0.00048595        | 0.00035090  | 0.00040509  | 0.00091178  |
| -5.00 | 0.00011159      | 0.00005961  | 0.00007356  | 0.00024212  | 0.00000456         | 0.00000073  | 0.00000235  | 0.00002755  | 0.00011637        | 0.00006149  | 0.00007428  | 0.00027011  |

**T2 (continued).** The values of electron density and its Hessian's eigenvalues of  $\rho_{total}$ ,  $\rho_{\sigma}$  and  $\rho_{\pi}$  in atomic units for  $C_5H_5AlH^-$ . The highlighted cells display the position of RCPs of  $\rho_{\pi}$ .

| R(Å)  | $\rho(r)_{\pi}$ |             |             |             | $\rho(r)_{\sigma}$ |             |             |             | $\rho(r)_{total}$ |             |             |             |
|-------|-----------------|-------------|-------------|-------------|--------------------|-------------|-------------|-------------|-------------------|-------------|-------------|-------------|
|       | $\rho$          | $\lambda_1$ | $\lambda_2$ | $\lambda_3$ | $\rho$             | $\lambda_1$ | $\lambda_2$ | $\lambda_3$ | $\rho$            | $\lambda_1$ | $\lambda_2$ | $\lambda_3$ |
| 5.00  | 0.00016060      | 0.00003488  | 0.00007801  | 0.00026163  | 0.00001634         | -0.00000289 | 0.00000224  | 0.00005605  | 0.00018177        | 0.00002605  | 0.00008010  | 0.00032367  |
| 4.00  | 0.00049056      | 0.00023882  | 0.00038748  | 0.00063452  | 0.00008684         | 0.00001379  | 0.00002775  | 0.00032316  | 0.00058839        | 0.00022967  | 0.00041549  | 0.00097547  |
| 3.00  | 0.00132447      | 0.00060283  | 0.00148740  | 0.00167655  | 0.00048074         | 0.00030663  | 0.00033642  | 0.00160864  | 0.00182588        | 0.00120259  | 0.00201347  | 0.00275403  |
| 2.50  | 0.00196801      | 0.00001834  | 0.00276143  | 0.00331938  | 0.00110279         | 0.00112667  | 0.00121011  | 0.00322212  | 0.00309345        | 0.00234888  | 0.00452657  | 0.00465737  |
| 2.00  | 0.00259299      | -0.00177084 | 0.00464826  | 0.00579299  | 0.00242892         | 0.00346139  | 0.00399210  | 0.00544771  | 0.00503828        | 0.00297120  | 0.00858745  | 0.00977033  |
| 1.80  | 0.00275087      | -0.00272853 | 0.00537736  | 0.00680057  | 0.00326410         | 0.00483981  | 0.00615223  | 0.00647823  | 0.00602602        | 0.00268988  | 0.01101296  | 0.01293035  |
| 1.62  | 0.00280335      | -0.00352286 | 0.00588107  | 0.00753644  | 0.00420403         | 0.00546490  | 0.00817765  | 0.00884594  | 0.00701271        | 0.00208605  | 0.01362951  | 0.01635222  |
| 1.50  | 0.00277790      | -0.00391048 | 0.00607934  | 0.00785610  | 0.00491999         | 0.00534992  | 0.00981452  | 0.01104837  | 0.00769934        | 0.00150277  | 0.01553962  | 0.01886936  |
| 1.30  | 0.00261106      | -0.00412601 | 0.00609138  | 0.00797438  | 0.00629054         | 0.00429934  | 0.01324382  | 0.01556029  | 0.00889709        | 0.00021417  | 0.01901054  | 0.02349278  |
| 1.00  | 0.00206412      | -0.00296236 | 0.00522295  | 0.00693347  | 0.00863840         | 0.00066320  | 0.01954956  | 0.02400862  | 0.01069264        | -0.00223264 | 0.02446913  | 0.03089778  |
| 0.75  | 0.00140647      | -0.00055821 | 0.00379475  | 0.00501793  | 0.01065338         | -0.00392812 | 0.02523733  | 0.03183633  | 0.01205014        | -0.00438260 | 0.02875055  | 0.03681785  |
| 0.50  | 0.00071974      | 0.00168435  | 0.00267754  | 0.00297268  | 0.01242649         | -0.00891251 | 0.03040505  | 0.03909178  | 0.01314011        | -0.00623424 | 0.03226415  | 0.04174795  |
| 0.25  | 0.00019614      | 0.00052661  | 0.00074360  | 0.00541548  | 0.01365241         | -0.01282005 | 0.03405579  | 0.04428751  | 0.01384669        | -0.00747339 | 0.03457278  | 0.04502475  |
| 0.00  | 0.00000000      | 0.00000000  | 0.00000010  | 0.00646154  | 0.01409144         | -0.01430510 | 0.03537761  | 0.04618160  | 0.01409144        | -0.00790727 | 0.03537761  | 0.04618170  |
| -0.25 | 0.00019614      | 0.00052661  | 0.00074360  | 0.00541548  | 0.01365241         | -0.01282005 | 0.03405579  | 0.04428751  | 0.01384669        | -0.00747339 | 0.03457278  | 0.04502475  |
| -0.50 | 0.00071974      | 0.00168435  | 0.00267754  | 0.00297268  | 0.01242649         | -0.00891251 | 0.03040505  | 0.03909178  | 0.01314011        | -0.00623424 | 0.03226415  | 0.04174795  |
| -0.75 | 0.00140647      | -0.00055821 | 0.00379475  | 0.00501793  | 0.01065338         | -0.00392812 | 0.02523733  | 0.03183633  | 0.01205014        | -0.00438260 | 0.02875055  | 0.03681785  |
| -1.00 | 0.00206412      | -0.00296236 | 0.00522295  | 0.00693347  | 0.00863840         | 0.00066320  | 0.01954956  | 0.02400862  | 0.01069264        | -0.00223264 | 0.02446913  | 0.03089778  |
| -1.30 | 0.00261106      | -0.00412601 | 0.00609138  | 0.00797438  | 0.00629054         | 0.00429934  | 0.01324382  | 0.01556029  | 0.00889709        | 0.00021417  | 0.01901054  | 0.02349278  |
| -1.50 | 0.00277790      | -0.00391048 | 0.00607934  | 0.00785610  | 0.00491999         | 0.00534992  | 0.00981452  | 0.01104837  | 0.00769934        | 0.00150277  | 0.01553962  | 0.01886936  |
| -1.62 | 0.00280335      | -0.00352286 | 0.00588107  | 0.00753644  | 0.00420403         | 0.00546490  | 0.00817765  | 0.00884594  | 0.00701271        | 0.00208605  | 0.01362951  | 0.01635222  |
| -1.80 | 0.00275087      | -0.00272853 | 0.00537736  | 0.00680057  | 0.00326410         | 0.00483981  | 0.00615223  | 0.00647823  | 0.00602602        | 0.00268988  | 0.01101296  | 0.01293035  |
| -2.00 | 0.00259299      | -0.00177084 | 0.00464826  | 0.00579299  | 0.00242892         | 0.00346139  | 0.00399210  | 0.00544771  | 0.00503828        | 0.00297120  | 0.00858745  | 0.00977033  |
| -2.50 | 0.00196801      | 0.00001834  | 0.00276143  | 0.00331938  | 0.00110279         | 0.00112667  | 0.00121011  | 0.00322212  | 0.00309345        | 0.00234888  | 0.00452657  | 0.00465737  |
| -3.00 | 0.00132447      | 0.00060283  | 0.00148740  | 0.00167655  | 0.00048074         | 0.00030663  | 0.00033642  | 0.00160864  | 0.00182588        | 0.00120259  | 0.00201347  | 0.00275403  |
| -4.00 | 0.00049056      | 0.00023882  | 0.00038748  | 0.00063452  | 0.00008684         | 0.00001379  | 0.00002775  | 0.00032316  | 0.00058839        | 0.00022967  | 0.00041549  | 0.00097547  |
| -5.00 | 0.00016060      | 0.00003488  | 0.00007801  | 0.00026163  | 0.00001634         | -0.00000289 | 0.00000224  | 0.00005605  | 0.00018177        | 0.00002605  | 0.00008010  | 0.00032367  |

**T2 (continued).** The values of electron density and its Hessian's eigenvalues of  $\rho_{total}$ ,  $\rho_\sigma$  and  $\rho_\pi$  in atomic units for  $C_5H_5SiH$ . The highlighted cells display the position of RCPs of  $\rho_\pi$ .

| R(Å)  | $\rho(r)_\pi$ |             |             |             | $\rho(r)_\sigma$ |             |             |             | $\rho(r)_{total}$ |             |             |             |
|-------|---------------|-------------|-------------|-------------|------------------|-------------|-------------|-------------|-------------------|-------------|-------------|-------------|
|       | $\rho$        | $\lambda_1$ | $\lambda_2$ | $\lambda_3$ | $\rho$           | $\lambda_1$ | $\lambda_2$ | $\lambda_3$ | $\rho$            | $\lambda_1$ | $\lambda_2$ | $\lambda_3$ |
| 5.00  | 0.00009392    | 0.00004807  | 0.00004984  | 0.00025282  | 0.00000625       | -0.00000005 | 0.00000108  | 0.00003135  | 0.00010400        | 0.00004424  | 0.00004765  | 0.00029402  |
| 4.00  | 0.00040616    | 0.00030026  | 0.00030502  | 0.00072540  | 0.00004928       | 0.00001617  | 0.00003009  | 0.00021594  | 0.00046728        | 0.00030722  | 0.00031621  | 0.00097411  |
| 3.00  | 0.00134517    | 0.00099933  | 0.00160153  | 0.00198781  | 0.00035598       | 0.00027960  | 0.00041475  | 0.00146700  | 0.00172933        | 0.00167883  | 0.00188220  | 0.00317530  |
| 2.50  | 0.00217526    | 0.00053016  | 0.00349966  | 0.00393875  | 0.00093491       | 0.00111671  | 0.00148561  | 0.00347173  | 0.00314569        | 0.00331631  | 0.00461716  | 0.00603279  |
| 2.00  | 0.00309981    | -0.00179728 | 0.00663156  | 0.00705896  | 0.00234444       | 0.00402444  | 0.00468813  | 0.00672963  | 0.00547704        | 0.00435617  | 0.01065083  | 0.01213612  |
| 1.75  | 0.00343751    | -0.00361848 | 0.00832230  | 0.00865412  | 0.00358419       | 0.00713811  | 0.00714461  | 0.00888591  | 0.00704728        | 0.00392988  | 0.01544832  | 0.01689780  |
| 1.60  | 0.00354052    | -0.00468830 | 0.00916342  | 0.00940815  | 0.00454927       | 0.00780986  | 0.00979593  | 0.01125725  | 0.00810946        | 0.00323216  | 0.01894182  | 0.02029549  |
| 1.53  | 0.00355439    | -0.00514922 | 0.00949024  | 0.00968580  | 0.00509678       | 0.00783583  | 0.01137633  | 0.01276851  | 0.00866761        | 0.00275189  | 0.02084611  | 0.02212327  |
| 1.40  | 0.00351272    | -0.00572342 | 0.00984836  | 0.00995799  | 0.00611040       | 0.00744117  | 0.01442044  | 0.01569444  | 0.00963401        | 0.00175726  | 0.02424337  | 0.02534310  |
| 1.25  | 0.00334566    | -0.00593827 | 0.00989234  | 0.00990288  | 0.00747659       | 0.00617973  | 0.01873299  | 0.01979430  | 0.01082675        | 0.00028178  | 0.02859445  | 0.02939371  |
| 1.00  | 0.00277890    | -0.00471791 | 0.00875609  | 0.00886361  | 0.01003555       | 0.00200640  | 0.02734495  | 0.02779311  | 0.01281075        | -0.00265273 | 0.03617225  | 0.03626376  |
| 0.75  | 0.00192893    | -0.00138136 | 0.00641295  | 0.00653134  | 0.01270976       | -0.00441524 | 0.03649454  | 0.03696094  | 0.01463178        | -0.00572035 | 0.04266016  | 0.04345924  |
| 0.50  | 0.00100045    | 0.00280786  | 0.00353728  | 0.00393387  | 0.01510626       | -0.01166652 | 0.04454466  | 0.04603459  | 0.01610141        | -0.00835040 | 0.04785521  | 0.04955075  |
| 0.25  | 0.00027487    | 0.00094255  | 0.00099718  | 0.00745155  | 0.01678330       | -0.01748283 | 0.05030786  | 0.05261564  | 0.01705642        | -0.01009316 | 0.05123693  | 0.05360596  |
| 0.00  | 0.00000000    | 0.00000000  | 0.00000000  | 0.00907984  | 0.01738751       | -0.01971728 | 0.05240929  | 0.05503076  | 0.01738751        | -0.01069870 | 0.05240929  | 0.05503076  |
| -0.25 | 0.00027487    | 0.00094255  | 0.00099718  | 0.00745155  | 0.01678330       | -0.01748283 | 0.05030786  | 0.05261564  | 0.01705642        | -0.01009316 | 0.05123693  | 0.05360596  |
| -0.50 | 0.00100045    | 0.00280786  | 0.00353728  | 0.00393387  | 0.01510626       | -0.01166652 | 0.04454466  | 0.04603459  | 0.01610141        | -0.00835040 | 0.04785521  | 0.04955075  |
| -0.75 | 0.00192893    | -0.00138136 | 0.00641295  | 0.00653134  | 0.01270976       | -0.00441524 | 0.03649454  | 0.03696094  | 0.01463178        | -0.00572035 | 0.04266016  | 0.04345924  |
| -1.00 | 0.00277890    | -0.00471791 | 0.00875609  | 0.00886361  | 0.01003555       | 0.00200640  | 0.02734495  | 0.02779311  | 0.01281075        | -0.00265273 | 0.03617225  | 0.03626376  |
| -1.25 | 0.00334566    | -0.00593827 | 0.00989234  | 0.00990288  | 0.00747659       | 0.00617973  | 0.01873299  | 0.01979430  | 0.01082675        | 0.00028178  | 0.02859445  | 0.02939371  |
| -1.40 | 0.00351272    | -0.00572342 | 0.00984836  | 0.00995799  | 0.00611040       | 0.00744117  | 0.01442044  | 0.01569444  | 0.00963401        | 0.00175726  | 0.02424337  | 0.02534310  |
| -1.53 | 0.00355439    | -0.00514922 | 0.00949024  | 0.00968580  | 0.00509678       | 0.00783583  | 0.01137633  | 0.01276851  | 0.00866761        | 0.00275189  | 0.02084611  | 0.02212327  |
| -1.60 | 0.00354052    | -0.00468830 | 0.00916342  | 0.00940815  | 0.00454927       | 0.00780986  | 0.00979593  | 0.01125725  | 0.00810946        | 0.00323216  | 0.01894182  | 0.02029549  |
| -1.75 | 0.00343751    | -0.00361848 | 0.00832230  | 0.00865412  | 0.00358419       | 0.00713811  | 0.00714461  | 0.00888591  | 0.00704728        | 0.00392988  | 0.01544832  | 0.01689780  |
| -2.00 | 0.00309981    | -0.00179728 | 0.00663156  | 0.00705896  | 0.00234444       | 0.00402444  | 0.00468813  | 0.00672963  | 0.00547704        | 0.00435617  | 0.01065083  | 0.01213612  |
| -2.50 | 0.00217526    | 0.00053016  | 0.00349966  | 0.00393875  | 0.00093491       | 0.00111671  | 0.00148561  | 0.00347173  | 0.00314569        | 0.00331631  | 0.00461716  | 0.00603279  |
| -3.00 | 0.00134517    | 0.00099933  | 0.00160153  | 0.00198781  | 0.00035598       | 0.00027960  | 0.00041475  | 0.00146700  | 0.00172933        | 0.00167883  | 0.00188220  | 0.00317530  |
| -4.00 | 0.00040616    | 0.00030026  | 0.00030502  | 0.00072540  | 0.00004928       | 0.00001617  | 0.00003009  | 0.00021594  | 0.00046728        | 0.00030722  | 0.00031621  | 0.00097411  |
| -5.00 | 0.00009392    | 0.00004807  | 0.00004984  | 0.00025282  | 0.00000625       | -0.00000005 | 0.00000108  | 0.00003135  | 0.00010400        | 0.00004424  | 0.00004765  | 0.00029402  |

**T2 (continued).** The values of electron density and its Hessian's eigenvalues of  $\rho_{total}$ ,  $\rho_{\sigma}$  and  $\rho_{\pi}$  in atomic units for  $C_5H_5N$ . The highlighted cells display the position of RCPs of  $\rho_{\pi}$ .

| R(Å)  | $\rho(r)_{\pi}$ |             |             |             | $\rho(r)_{\sigma}$ |             |             |             | $\rho(r)_{total}$ |             |             |             |
|-------|-----------------|-------------|-------------|-------------|--------------------|-------------|-------------|-------------|-------------------|-------------|-------------|-------------|
|       | $\rho$          | $\lambda_1$ | $\lambda_2$ | $\lambda_3$ | $\rho$             | $\lambda_1$ | $\lambda_2$ | $\lambda_3$ | $\rho$            | $\lambda_1$ | $\lambda_2$ | $\lambda_3$ |
| 5.00  | 0.00004814      | 0.00002783  | 0.00004828  | 0.00017389  | 0.00000184         | 0.00000013  | 0.00000178  | 0.00001334  | 0.00005090        | 0.00002621  | 0.00005002  | 0.00019079  |
| 4.00  | 0.00028620      | 0.00023489  | 0.00030233  | 0.00066541  | 0.00002381         | 0.00000501  | 0.00002378  | 0.00013577  | 0.00031390        | 0.00022868  | 0.00032630  | 0.00081300  |
| 3.00  | 0.00124084      | 0.00160122  | 0.00187415  | 0.00188047  | 0.00024965         | 0.00018066  | 0.00033903  | 0.00135246  | 0.00150120        | 0.00174473  | 0.00221869  | 0.00327347  |
| 2.50  | 0.00230824      | 0.00186657  | 0.00407612  | 0.00459814  | 0.00079247         | 0.00092577  | 0.00142440  | 0.00402278  | 0.00311778        | 0.00457773  | 0.00602387  | 0.00631903  |
| 2.00  | 0.00378251      | -0.00098630 | 0.00875781  | 0.00971360  | 0.00239699         | 0.00414839  | 0.00552088  | 0.00955787  | 0.00620329        | 0.00821113  | 0.01320408  | 0.01523707  |
| 1.75  | 0.00447996      | -0.00406175 | 0.01175561  | 0.01281403  | 0.00399448         | 0.00811467  | 0.01015194  | 0.01275913  | 0.00849926        | 0.00845231  | 0.01998758  | 0.02296662  |
| 1.60  | 0.00478947      | -0.00619750 | 0.01348041  | 0.01452126  | 0.00531924         | 0.01171777  | 0.01423111  | 0.01426012  | 0.01013266        | 0.00778390  | 0.02530788  | 0.02875036  |
| 1.38  | 0.00497926      | -0.00895065 | 0.01539032  | 0.01629553  | 0.00779090         | 0.01445872  | 0.01951097  | 0.02225860  | 0.01279075        | 0.00551835  | 0.03467579  | 0.03854513  |
| 1.25  | 0.00489609      | -0.00996902 | 0.01595500  | 0.01672676  | 0.00965136         | 0.01331167  | 0.02562408  | 0.02859430  | 0.01456491        | 0.00332973  | 0.04136413  | 0.04530561  |
| 1.15  | 0.00471882      | -0.01015918 | 0.01595742  | 0.01661610  | 0.01120147         | 0.01149297  | 0.03100954  | 0.03404197  | 0.01593508        | 0.00132405  | 0.04674972  | 0.05063695  |
| 1.00  | 0.00426464      | -0.00925796 | 0.01517802  | 0.01566463  | 0.01373263         | 0.00709028  | 0.04027351  | 0.04324169  | 0.01800791        | -0.00216724 | 0.05524283  | 0.05887622  |
| 0.75  | 0.00307784      | -0.00424592 | 0.01177847  | 0.01202161  | 0.01822882         | -0.00446919 | 0.05797158  | 0.06044837  | 0.02131131        | -0.00869793 | 0.06959248  | 0.07242864  |
| 0.50  | 0.00164350      | 0.00397172  | 0.00668531  | 0.00675107  | 0.02243047         | -0.01896782 | 0.07576675  | 0.07746925  | 0.02407516        | -0.01491611 | 0.08232744  | 0.08416638  |
| 0.25  | 0.00045978      | 0.00190616  | 0.00194388  | 0.01199423  | 0.02545827         | -0.03136725 | 0.08926766  | 0.09027536  | 0.02591815        | -0.01937923 | 0.09117094  | 0.09220121  |
| 0.00  | 0.00000000      | 0.00000000  | 0.00000005  | 0.01528128  | 0.02656579         | -0.03628251 | 0.09433951  | 0.09507020  | 0.02656579        | -0.02100058 | 0.09433955  | 0.09507022  |
| -0.25 | 0.00045978      | 0.00190616  | 0.00194388  | 0.01199423  | 0.02545827         | -0.03136725 | 0.08926766  | 0.09027536  | 0.02591815        | -0.01937923 | 0.09117094  | 0.09220121  |
| -0.50 | 0.00164350      | 0.00397172  | 0.00668531  | 0.00675107  | 0.02243047         | -0.01896782 | 0.07576675  | 0.07746925  | 0.02407516        | -0.01491611 | 0.08232744  | 0.08416638  |
| -0.75 | 0.00307784      | -0.00424592 | 0.01177847  | 0.01202161  | 0.01822882         | -0.00446919 | 0.05797158  | 0.06044837  | 0.02131131        | -0.00869793 | 0.06959248  | 0.07242864  |
| -1.00 | 0.00426464      | -0.00925796 | 0.01517802  | 0.01566463  | 0.01373263         | 0.00709028  | 0.04027351  | 0.04324169  | 0.01800791        | -0.00216724 | 0.05524283  | 0.05887622  |
| -1.15 | 0.00471882      | -0.01015918 | 0.01595742  | 0.01661610  | 0.01120147         | 0.01149297  | 0.03100954  | 0.03404197  | 0.01593508        | 0.00132405  | 0.04674972  | 0.05063695  |
| -1.25 | 0.00489609      | -0.00996902 | 0.01595500  | 0.01672676  | 0.00965136         | 0.01331167  | 0.02562408  | 0.02859430  | 0.01456491        | 0.00332973  | 0.04136413  | 0.04530561  |
| -1.38 | 0.00497926      | -0.00895065 | 0.01539032  | 0.01629553  | 0.00779090         | 0.01445872  | 0.01951097  | 0.02225860  | 0.01279075        | 0.00551835  | 0.03467579  | 0.03854513  |
| -1.60 | 0.00478947      | -0.00619750 | 0.01348041  | 0.01452126  | 0.00531924         | 0.01171777  | 0.01423111  | 0.01426012  | 0.01013266        | 0.00778390  | 0.02530788  | 0.02875036  |
| -1.75 | 0.00447996      | -0.00406175 | 0.01175561  | 0.01281403  | 0.00399448         | 0.00811467  | 0.01015194  | 0.01275913  | 0.00849926        | 0.00845231  | 0.01998758  | 0.02296662  |
| -2.00 | 0.00378251      | -0.00098630 | 0.00875781  | 0.00971360  | 0.00239699         | 0.00414839  | 0.00552088  | 0.00955787  | 0.00620329        | 0.00821113  | 0.01320408  | 0.01523707  |
| -2.50 | 0.00230824      | 0.00186657  | 0.00407612  | 0.00459814  | 0.00079247         | 0.00092577  | 0.00142440  | 0.00402278  | 0.00311778        | 0.00457773  | 0.00602387  | 0.00631903  |
| -3.00 | 0.00124084      | 0.00160122  | 0.00187415  | 0.00188047  | 0.00024965         | 0.00018066  | 0.00033903  | 0.00135246  | 0.00150120        | 0.00174473  | 0.00221869  | 0.00327347  |
| -4.00 | 0.00028620      | 0.00023489  | 0.00030233  | 0.00066541  | 0.00002381         | 0.00000501  | 0.00002378  | 0.00013577  | 0.00031390        | 0.00022868  | 0.00032630  | 0.00081300  |
| -5.00 | 0.00004814      | 0.00002783  | 0.00004828  | 0.00017389  | 0.00000184         | 0.00000013  | 0.00000178  | 0.00001334  | 0.00005090        | 0.00002621  | 0.00005002  | 0.00019079  |

**T2 (continued).** The values of electron density and its Hessian's eigenvalues of  $\rho_{total}$ ,  $\rho_\sigma$  and  $\rho_\pi$  in atomic units for  $C_5H_5NH^+$ . The highlighted cells display the position of RCPs of  $\rho_\pi$ .

| R(Å)  | $\rho(r)_\pi$ |             |             |             | $\rho(r)_\sigma$ |             |             |             | $\rho(r)_{total}$ |             |             |             |
|-------|---------------|-------------|-------------|-------------|------------------|-------------|-------------|-------------|-------------------|-------------|-------------|-------------|
|       | $\rho$        | $\lambda_1$ | $\lambda_2$ | $\lambda_3$ | $\rho$           | $\lambda_1$ | $\lambda_2$ | $\lambda_3$ | $\rho$            | $\lambda_1$ | $\lambda_2$ | $\lambda_3$ |
| 5.00  | 0.00003497    | 0.00001187  | 0.00003570  | 0.00015454  | 0.00000128       | -0.00000019 | 0.00000130  | 0.00001208  | 0.00003710        | 0.00001034  | 0.00003684  | 0.00016976  |
| 4.00  | 0.00024017    | 0.00015284  | 0.00024995  | 0.00064306  | 0.00002082       | 0.00000421  | 0.00001879  | 0.00012295  | 0.00026506        | 0.00014662  | 0.00026831  | 0.00077736  |
| 3.50  | 0.00054214    | 0.00046504  | 0.00064435  | 0.00116848  | 0.00006941       | 0.00003193  | 0.00007104  | 0.00038163  | 0.00061902        | 0.00047136  | 0.00071516  | 0.00157548  |
| 3.00  | 0.00113051    | 0.00129562  | 0.00169667  | 0.00193872  | 0.00022300       | 0.00017977  | 0.00029606  | 0.00123083  | 0.00136640        | 0.00142673  | 0.00199334  | 0.00321526  |
| 2.50  | 0.00216705    | 0.00194848  | 0.00371486  | 0.00429082  | 0.00071199       | 0.00091262  | 0.00128983  | 0.00373763  | 0.00289995        | 0.00403439  | 0.00558337  | 0.00624027  |
| 2.00  | 0.00363897    | -0.00074924 | 0.00842165  | 0.00925650  | 0.00217931       | 0.00409425  | 0.00512251  | 0.00909603  | 0.00584564        | 0.00775216  | 0.01291922  | 0.01438727  |
| 1.75  | 0.00435550    | -0.00383863 | 0.01164301  | 0.01229329  | 0.00365819       | 0.00802521  | 0.00949550  | 0.01231963  | 0.00804000        | 0.00801348  | 0.01981662  | 0.02180132  |
| 1.50  | 0.00483042    | -0.00746728 | 0.01473727  | 0.01491223  | 0.00588204       | 0.01346108  | 0.01579089  | 0.01655557  | 0.01073308        | 0.00648584  | 0.02958959  | 0.03148395  |
| 1.36  | 0.00490864    | -0.00912918 | 0.01582071  | 0.01598839  | 0.00743999       | 0.01385508  | 0.02064861  | 0.02174279  | 0.01236443        | 0.00480742  | 0.03605805  | 0.03758043  |
| 1.15  | 0.00468516    | -0.01033080 | 0.01606037  | 0.01677177  | 0.01043019       | 0.01125895  | 0.03158555  | 0.03213193  | 0.01512232        | 0.00096365  | 0.04779283  | 0.04820771  |
| 1.00  | 0.00425216    | -0.00952882 | 0.01514502  | 0.01613814  | 0.01283091       | 0.00708809  | 0.04082957  | 0.04110927  | 0.01708429        | -0.00239035 | 0.05598690  | 0.05668951  |
| 0.75  | 0.00308714    | -0.00456489 | 0.01161792  | 0.01273662  | 0.01711294       | -0.00401783 | 0.05704516  | 0.05937645  | 0.02019525        | -0.00850619 | 0.06866839  | 0.07163671  |
| 0.50  | 0.00165575    | 0.00371641  | 0.00650468  | 0.00741803  | 0.02112988       | -0.01803803 | 0.07301658  | 0.07779688  | 0.02278057        | -0.01413295 | 0.07952135  | 0.08477941  |
| 0.25  | 0.00046447    | 0.00188076  | 0.00208119  | 0.01207967  | 0.02403177       | -0.03005759 | 0.08498931  | 0.09179503  | 0.02449437        | -0.01804737 | 0.08686904  | 0.09382812  |
| 0.00  | 0.00000000    | 0.00000000  | 0.00000004  | 0.01545133  | 0.02509452       | -0.03482620 | 0.08946286  | 0.09705773  | 0.02509452        | -0.01944249 | 0.08946290  | 0.09705773  |
| -0.25 | 0.00046447    | 0.00188076  | 0.00208119  | 0.01207967  | 0.02403177       | -0.03005759 | 0.08498931  | 0.09179503  | 0.02449437        | -0.01804737 | 0.08686904  | 0.09382812  |
| -0.50 | 0.00165575    | 0.00371641  | 0.00650468  | 0.00741803  | 0.02112988       | -0.01803803 | 0.07301658  | 0.07779688  | 0.02278057        | -0.01413295 | 0.07952135  | 0.08477941  |
| -0.75 | 0.00308714    | -0.00456489 | 0.01161792  | 0.01273662  | 0.01711294       | -0.00401783 | 0.05704516  | 0.05937645  | 0.02019525        | -0.00850619 | 0.06866839  | 0.07163671  |
| -1.00 | 0.00425216    | -0.00952882 | 0.01514502  | 0.01613814  | 0.01283091       | 0.00708809  | 0.04082957  | 0.04110927  | 0.01708429        | -0.00239035 | 0.05598690  | 0.05668951  |
| -1.15 | 0.00468516    | -0.01033080 | 0.01606037  | 0.01677177  | 0.01043019       | 0.01125895  | 0.03158555  | 0.03213193  | 0.01512232        | 0.00096365  | 0.04779283  | 0.04820771  |
| -1.36 | 0.00490864    | -0.00912918 | 0.01582071  | 0.01598839  | 0.00743999       | 0.01385508  | 0.02064861  | 0.02174279  | 0.01236443        | 0.00480742  | 0.03605805  | 0.03758043  |
| -1.50 | 0.00483042    | -0.00746728 | 0.01473727  | 0.01491223  | 0.00588204       | 0.01346108  | 0.01579089  | 0.01655557  | 0.01073308        | 0.00648584  | 0.02958959  | 0.03148395  |
| -1.75 | 0.00435550    | -0.00383863 | 0.01164301  | 0.01229329  | 0.00365819       | 0.00802521  | 0.00949550  | 0.01231963  | 0.00804000        | 0.00801348  | 0.01981662  | 0.02180132  |
| -2.00 | 0.00363897    | -0.00074924 | 0.00842165  | 0.00925650  | 0.00217931       | 0.00409425  | 0.00512251  | 0.00909603  | 0.00584564        | 0.00775216  | 0.01291922  | 0.01438727  |
| -2.50 | 0.00216705    | 0.00194848  | 0.00371486  | 0.00429082  | 0.00071199       | 0.00091262  | 0.00128983  | 0.00373763  | 0.00289995        | 0.00403439  | 0.00558337  | 0.00624027  |
| -3.00 | 0.00113051    | 0.00129562  | 0.00169667  | 0.00193872  | 0.00022300       | 0.00017977  | 0.00029606  | 0.00123083  | 0.00136640        | 0.00142673  | 0.00199334  | 0.00321526  |
| -3.50 | 0.00054214    | 0.00046504  | 0.00064435  | 0.00116848  | 0.00006941       | 0.00003193  | 0.00007104  | 0.00038163  | 0.00061902        | 0.00047136  | 0.00071516  | 0.00157548  |
| -4.00 | 0.00024017    | 0.00015284  | 0.00024995  | 0.00064306  | 0.00002082       | 0.00000421  | 0.00001879  | 0.00012295  | 0.00026506        | 0.00014662  | 0.00026831  | 0.00077736  |
| -5.00 | 0.00003497    | 0.00001187  | 0.00003570  | 0.00015454  | 0.00000128       | -0.00000019 | 0.00000130  | 0.00001208  | 0.00003710        | 0.00001034  | 0.00003684  | 0.00016976  |

**T2 (continued).** The values of electron density and its Hessian's eigenvalues of  $\rho_{total}$ ,  $\rho_\sigma$  and  $\rho_\pi$  in atomic units for  $C_5H_5P$ . The highlighted cells display the position of RCPs of  $\rho_\pi$ .

| R(Å)  | $\rho(r)_\pi$ |             |             |             | $\rho(r)_\sigma$ |             |             |             | $\rho(r)_{total}$ |             |             |             |
|-------|---------------|-------------|-------------|-------------|------------------|-------------|-------------|-------------|-------------------|-------------|-------------|-------------|
|       | $\rho$        | $\lambda_1$ | $\lambda_2$ | $\lambda_3$ | $\rho$           | $\lambda_1$ | $\lambda_2$ | $\lambda_3$ | $\rho$            | $\lambda_1$ | $\lambda_2$ | $\lambda_3$ |
| 5.00  | 0.00007267    | 0.00004545  | 0.00005296  | 0.00021571  | 0.00000287       | 0.00000121  | 0.00000176  | 0.00002035  | 0.00007483        | 0.00004678  | 0.00005668  | 0.00023309  |
| 4.00  | 0.00035519    | 0.00028883  | 0.00030834  | 0.00066295  | 0.00003479       | 0.00001772  | 0.00001942  | 0.00017379  | 0.00038756        | 0.00030858  | 0.00034121  | 0.00081942  |
| 3.00  | 0.00126508    | 0.00112192  | 0.00165858  | 0.00186789  | 0.00030635       | 0.00029682  | 0.00030498  | 0.00136503  | 0.00156552        | 0.00194784  | 0.00196582  | 0.00270413  |
| 2.50  | 0.00211586    | 0.00076581  | 0.00377062  | 0.00381401  | 0.00086586       | 0.00122120  | 0.00124869  | 0.00350736  | 0.00297482        | 0.00409362  | 0.00504949  | 0.00520414  |
| 2.00  | 0.00311611    | -0.00162379 | 0.00687745  | 0.00753215  | 0.00231775       | 0.00437195  | 0.00463608  | 0.00720326  | 0.00542937        | 0.00547187  | 0.01140805  | 0.01216670  |
| 1.75  | 0.00350812    | -0.00362711 | 0.00849056  | 0.00963443  | 0.00364440       | 0.00757497  | 0.00833653  | 0.00903793  | 0.00715095        | 0.00516651  | 0.01637417  | 0.01796945  |
| 1.60  | 0.00364358    | -0.00484954 | 0.00926860  | 0.01072107  | 0.00469603       | 0.00915193  | 0.01081602  | 0.01152921  | 0.00834015        | 0.00447287  | 0.01998318  | 0.02224916  |
| 1.49  | 0.00367561    | -0.00561757 | 0.00967077  | 0.01133221  | 0.00559459       | 0.00926567  | 0.01319728  | 0.01439878  | 0.00927232        | 0.00369230  | 0.02289437  | 0.02573032  |
| 1.35  | 0.00361783    | -0.00628809 | 0.00990858  | 0.01178991  | 0.00691022       | 0.00863880  | 0.01694654  | 0.01879732  | 0.01053206        | 0.00234748  | 0.02692823  | 0.03058727  |
| 1.15  | 0.00332262    | -0.00627733 | 0.00957882  | 0.01161666  | 0.00906749       | 0.00614000  | 0.02341122  | 0.02643578  | 0.01239616        | -0.00016535 | 0.03308292  | 0.03805356  |
| 1.00  | 0.00293781    | -0.00529924 | 0.00876408  | 0.01075665  | 0.01085074       | 0.00293652  | 0.02897928  | 0.03309243  | 0.01379533        | -0.00239448 | 0.03783418  | 0.04385082  |
| 0.75  | 0.00205524    | -0.00174821 | 0.00644644  | 0.00802492  | 0.01391974       | -0.00458840 | 0.03895902  | 0.04517784  | 0.01598115        | -0.00634770 | 0.04546558  | 0.05320460  |
| 0.50  | 0.00107203    | 0.00303160  | 0.00381232  | 0.00439104  | 0.01669673       | -0.01328395 | 0.04837353  | 0.05673011  | 0.01777255        | -0.00992429 | 0.05190003  | 0.06112178  |
| 0.25  | 0.00029556    | 0.00098227  | 0.00124871  | 0.00793959  | 0.01865293       | -0.02035937 | 0.05520662  | 0.06519304  | 0.01894963        | -0.01240085 | 0.05620940  | 0.06644117  |
| 0.00  | 0.00000000    | 0.00000000  | 0.00000030  | 0.00977468  | 0.01936009       | -0.02309681 | 0.05771589  | 0.06831582  | 0.01936009        | -0.01328351 | 0.05771639  | 0.06831585  |
| -0.25 | 0.00029556    | 0.00098227  | 0.00124871  | 0.00793959  | 0.01865293       | -0.02035937 | 0.05520662  | 0.06519304  | 0.01894963        | -0.01240085 | 0.05620940  | 0.06644117  |
| -0.50 | 0.00107203    | 0.00303160  | 0.00381232  | 0.00439104  | 0.01669673       | -0.01328395 | 0.04837353  | 0.05673011  | 0.01777255        | -0.00992429 | 0.05190003  | 0.06112178  |
| -0.75 | 0.00205524    | -0.00174821 | 0.00644644  | 0.00802492  | 0.01391974       | -0.00458840 | 0.03895902  | 0.04517784  | 0.01598115        | -0.00634770 | 0.04546558  | 0.05320460  |
| -1.00 | 0.00293781    | -0.00529924 | 0.00876408  | 0.01075665  | 0.01085074       | 0.00293652  | 0.02897928  | 0.03309243  | 0.01379533        | -0.00239448 | 0.03783418  | 0.04385082  |
| -1.15 | 0.00332262    | -0.00627733 | 0.00957882  | 0.01161666  | 0.00906749       | 0.00614000  | 0.02341122  | 0.02643578  | 0.01239616        | -0.00016535 | 0.03308292  | 0.03805356  |
| -1.35 | 0.00361783    | -0.00628809 | 0.00990858  | 0.01178991  | 0.00691022       | 0.00863880  | 0.01694654  | 0.01879732  | 0.01053206        | 0.00234748  | 0.02692823  | 0.03058727  |
| -1.49 | 0.00367561    | -0.00561757 | 0.00967077  | 0.01133221  | 0.00559459       | 0.00926567  | 0.01319728  | 0.01439878  | 0.00927232        | 0.00369230  | 0.02289437  | 0.02573032  |
| -1.60 | 0.00364358    | -0.00484954 | 0.00926860  | 0.01072107  | 0.00469603       | 0.00915193  | 0.01081602  | 0.01152921  | 0.00834015        | 0.00447287  | 0.01998318  | 0.02224916  |
| -1.75 | 0.00350812    | -0.00362711 | 0.00849056  | 0.00963443  | 0.00364440       | 0.00757497  | 0.00833653  | 0.00903793  | 0.00715095        | 0.00516651  | 0.01637417  | 0.01796945  |
| -2.00 | 0.00311611    | -0.00162379 | 0.00687745  | 0.00753215  | 0.00231775       | 0.00437195  | 0.00463608  | 0.00720326  | 0.00542937        | 0.00547187  | 0.01140805  | 0.01216670  |
| -2.50 | 0.00211586    | 0.00076581  | 0.00377062  | 0.00381401  | 0.00086586       | 0.00122120  | 0.00124869  | 0.00350736  | 0.00297482        | 0.00409362  | 0.00504949  | 0.00520414  |
| -3.00 | 0.00126508    | 0.00112192  | 0.00165858  | 0.00186789  | 0.00030635       | 0.00029682  | 0.00030498  | 0.00136503  | 0.00156552        | 0.00194784  | 0.00196582  | 0.00270413  |
| -4.00 | 0.00035519    | 0.00028883  | 0.00030834  | 0.00066295  | 0.00003479       | 0.00001772  | 0.00001942  | 0.00017379  | 0.00038756        | 0.00030858  | 0.00034121  | 0.00081942  |
| -5.00 | 0.00007267    | 0.00004545  | 0.00005296  | 0.00021571  | 0.00000287       | 0.00000121  | 0.00000176  | 0.00002035  | 0.00007483        | 0.00004678  | 0.00005668  | 0.00023309  |

**T2 (continued).** The values of electron density and its Hessian's eigenvalues of  $\rho_{total}$ ,  $\rho_\sigma$  and  $\rho_\pi$  in atomic units for  $C_5H_5O^+$ . The highlighted cells display the position of RCPs of  $\rho_\pi$ .

| R(Å)  | $\rho(r)_\pi$ |             |             |             | $\rho(r)_\sigma$ |             |             |             | $\rho(r)_{total}$ |             |             |             |
|-------|---------------|-------------|-------------|-------------|------------------|-------------|-------------|-------------|-------------------|-------------|-------------|-------------|
|       | $\rho$        | $\lambda_1$ | $\lambda_2$ | $\lambda_3$ | $\rho$           | $\lambda_1$ | $\lambda_2$ | $\lambda_3$ | $\rho$            | $\lambda_1$ | $\lambda_2$ | $\lambda_3$ |
| 5.00  | 0.00003302    | -0.00000141 | 0.00003442  | 0.00014733  | 0.00000135       | -0.00000033 | 0.00000122  | 0.00001191  | 0.00003651        | -0.00000359 | 0.00003534  | 0.00016706  |
| 4.00  | 0.00022201    | 0.00006732  | 0.00024770  | 0.00062588  | 0.00002057       | -0.00000055 | 0.00001820  | 0.00012264  | 0.00025448        | 0.00004581  | 0.00026488  | 0.00077833  |
| 3.00  | 0.00106286    | 0.00107341  | 0.00172686  | 0.00199916  | 0.00022238       | 0.00012254  | 0.00029519  | 0.00126742  | 0.00132575        | 0.00104597  | 0.00202646  | 0.00340811  |
| 2.50  | 0.00208424    | 0.00205218  | 0.00332702  | 0.00443145  | 0.00071999       | 0.00071927  | 0.00129951  | 0.00386649  | 0.00286947        | 0.00327159  | 0.00574525  | 0.00663083  |
| 2.00  | 0.00357268    | -0.00059691 | 0.00759431  | 0.00970062  | 0.00222460       | 0.00344247  | 0.00520798  | 0.00943249  | 0.00588692        | 0.00731632  | 0.01219510  | 0.01493904  |
| 1.75  | 0.00431170    | -0.00372058 | 0.01064805  | 0.01296971  | 0.00374435       | 0.00694732  | 0.00969021  | 0.01282413  | 0.00814853        | 0.008092263 | 0.017933878 | 0.02269933  |
| 1.50  | 0.00481705    | -0.00744654 | 0.01376175  | 0.01583345  | 0.00603371       | 0.01268797  | 0.01570287  | 0.01695038  | 0.01093319        | 0.00686079  | 0.02680382  | 0.03282793  |
| 1.35  | 0.00491438    | -0.00935341 | 0.01525667  | 0.01693341  | 0.00783055       | 0.01426017  | 0.01982921  | 0.02294029  | 0.01281460        | 0.00505247  | 0.03370600  | 0.03991582  |
| 1.25  | 0.00486611    | -0.01021263 | 0.01593235  | 0.01726639  | 0.00921614       | 0.01358613  | 0.02439603  | 0.02769878  | 0.01414109        | 0.00339465  | 0.03897858  | 0.04500323  |
| 1.15  | 0.00471689    | -0.01056374 | 0.01624610  | 0.01720464  | 0.01073356       | 0.01196002  | 0.02985936  | 0.03303317  | 0.01549740        | 0.00141396  | 0.04470449  | 0.05026961  |
| 1.00  | 0.00429773    | -0.00986547 | 0.01588848  | 0.01628771  | 0.01322494       | 0.00772995  | 0.03955744  | 0.04204468  | 0.01755143        | -0.00206744 | 0.05400167  | 0.05835142  |
| 0.75  | 0.00313931    | -0.00494486 | 0.01257920  | 0.01286599  | 0.01768733       | -0.00384301 | 0.05876792  | 0.05889784  | 0.02083124        | -0.00862870 | 0.07035162  | 0.07147302  |
| 0.50  | 0.00169231    | 0.00345173  | 0.00709523  | 0.00775820  | 0.02189503       | -0.01871343 | 0.07555905  | 0.07872742  | 0.02358239        | -0.01488556 | 0.08263889  | 0.08543013  |
| 0.25  | 0.00047635    | 0.00207532  | 0.00213227  | 0.01234932  | 0.02494740       | -0.03160005 | 0.08808652  | 0.09419671  | 0.02542095        | -0.01936260 | 0.09015179  | 0.09616883  |
| 0.00  | 0.00000000    | 0.00000000  | 0.00000046  | 0.01586544  | 0.02606786       | -0.03673990 | 0.09277527  | 0.10006919  | 0.02606786        | -0.02098375 | 0.09277561  | 0.10006919  |
| -0.25 | 0.00047635    | 0.00207532  | 0.00213227  | 0.01234932  | 0.02494740       | -0.03160005 | 0.08808652  | 0.09419671  | 0.02542095        | -0.01936260 | 0.09015179  | 0.09616883  |
| -0.50 | 0.00169231    | 0.00345173  | 0.00709523  | 0.00775820  | 0.02189503       | -0.01871343 | 0.07555905  | 0.07872742  | 0.02358239        | -0.01488556 | 0.08263889  | 0.08543013  |
| -0.75 | 0.00313931    | -0.00494486 | 0.01257920  | 0.01286599  | 0.01768733       | -0.00384301 | 0.05876792  | 0.05889784  | 0.02083124        | -0.00862870 | 0.07035162  | 0.07147302  |
| -1.00 | 0.00429773    | -0.00986547 | 0.01588848  | 0.01628771  | 0.01322494       | 0.00772995  | 0.03955744  | 0.04204468  | 0.01755143        | -0.00206744 | 0.05400167  | 0.05835142  |
| -1.15 | 0.00471689    | -0.01056374 | 0.01624610  | 0.01720464  | 0.01073356       | 0.01196002  | 0.02985936  | 0.03303317  | 0.01549740        | 0.00141396  | 0.04470449  | 0.05026961  |
| -1.25 | 0.00486611    | -0.01021263 | 0.01593235  | 0.01726639  | 0.00921614       | 0.01358613  | 0.02439603  | 0.02769878  | 0.01414109        | 0.00339465  | 0.03897858  | 0.04500323  |
| -1.35 | 0.00491438    | -0.00935341 | 0.01525667  | 0.01693341  | 0.00783055       | 0.01426017  | 0.01982921  | 0.02294029  | 0.01281460        | 0.00505247  | 0.03370600  | 0.03991582  |
| -1.50 | 0.00481705    | -0.00744654 | 0.01376175  | 0.01583345  | 0.00603371       | 0.01268797  | 0.01570287  | 0.01695038  | 0.01093319        | 0.00686079  | 0.02680382  | 0.03282793  |
| -1.75 | 0.00431170    | -0.00372058 | 0.01064805  | 0.01296971  | 0.00374435       | 0.00694732  | 0.00969021  | 0.01282413  | 0.00814853        | 0.008092263 | 0.017933878 | 0.02269933  |
| -2.00 | 0.00357268    | -0.00059691 | 0.00759431  | 0.00970062  | 0.00222460       | 0.00344247  | 0.00520798  | 0.00943249  | 0.00588692        | 0.00731632  | 0.01219510  | 0.01493904  |
| -2.50 | 0.00208424    | 0.00205218  | 0.00332702  | 0.00443145  | 0.00071999       | 0.00071927  | 0.00129951  | 0.00386649  | 0.00286947        | 0.00327159  | 0.00574525  | 0.00663083  |
| -3.00 | 0.00106286    | 0.00107341  | 0.00172686  | 0.00199916  | 0.00022238       | 0.00012254  | 0.00029519  | 0.00126742  | 0.00132575        | 0.00104597  | 0.00202646  | 0.00340811  |
| -4.00 | 0.00022201    | 0.00006732  | 0.00024770  | 0.00062588  | 0.00002057       | -0.00000055 | 0.00001820  | 0.00012264  | 0.00025448        | 0.00004581  | 0.00026488  | 0.00077833  |
| -5.00 | 0.00003302    | -0.00000141 | 0.00003442  | 0.00014733  | 0.00000135       | -0.00000033 | 0.00000122  | 0.00001191  | 0.00003651        | -0.00000359 | 0.00003534  | 0.00016706  |

**T2 (continued).** The values of electron density and its Hessian's eigenvalues of  $\rho_{total}$ ,  $\rho_\sigma$  and  $\rho_\pi$  in atomic units for  $C_5H_5S^+$ . The highlighted cells display the position of RCPs of  $\rho_\pi$ .

| R(Å)  | $\rho(r)_\pi$ |             |             |             | $\rho(r)_\sigma$ |             |             |             | $\rho(r)_{total}$ |             |             |             |
|-------|---------------|-------------|-------------|-------------|------------------|-------------|-------------|-------------|-------------------|-------------|-------------|-------------|
|       | $\rho$        | $\lambda_1$ | $\lambda_2$ | $\lambda_3$ | $\rho$           | $\lambda_1$ | $\lambda_2$ | $\lambda_3$ | $\rho$            | $\lambda_1$ | $\lambda_2$ | $\lambda_3$ |
| 5.00  | 0.00004442    | 0.00003150  | 0.00003770  | 0.00015885  | 0.00000174       | 0.00000071  | 0.00000090  | 0.00001385  | 0.00004598        | 0.00003257  | 0.00003779  | 0.00017226  |
| 4.00  | 0.00026428    | 0.00022665  | 0.00025434  | 0.00055455  | 0.00002474       | 0.00001373  | 0.00001556  | 0.00013765  | 0.00028855        | 0.00024309  | 0.00026279  | 0.00069047  |
| 3.00  | 0.00108008    | 0.00134231  | 0.00147553  | 0.00162367  | 0.00025151       | 0.00026299  | 0.00027702  | 0.00125949  | 0.00133067        | 0.00174356  | 0.00183932  | 0.00262816  |
| 2.50  | 0.00193551    | 0.00117601  | 0.00358444  | 0.00370046  | 0.00076412       | 0.00113246  | 0.00120265  | 0.00345899  | 0.00269997        | 0.00461461  | 0.00472831  | 0.00486519  |
| 2.00  | 0.00303719    | -0.00127505 | 0.00723968  | 0.00744168  | 0.00217825       | 0.00439169  | 0.00453285  | 0.00746686  | 0.00522193        | 0.00617080  | 0.01170206  | 0.01185501  |
| 1.75  | 0.00351320    | -0.00355008 | 0.00918487  | 0.00969524  | 0.00351420       | 0.00803449  | 0.00810944  | 0.00947408  | 0.00703929        | 0.00584158  | 0.01726226  | 0.01775572  |
| 1.60  | 0.00370177    | -0.00500602 | 0.01016664  | 0.01089284  | 0.00458926       | 0.01001166  | 0.01121095  | 0.01136780  | 0.00830647        | 0.00505704  | 0.02135306  | 0.02213239  |
| 1.44  | 0.00377852    | -0.00634110 | 0.01088822  | 0.01184051  | 0.00599340       | 0.01003295  | 0.01556350  | 0.01560693  | 0.00979087        | 0.00366491  | 0.02633402  | 0.02747804  |
| 1.25  | 0.00365882    | -0.00715215 | 0.01108916  | 0.01225026  | 0.00797038       | 0.00854391  | 0.02183859  | 0.02217672  | 0.01165111        | 0.00133179  | 0.03283436  | 0.03445816  |
| 1.15  | 0.00349383    | -0.00707328 | 0.01084864  | 0.01207496  | 0.00914327       | 0.00698598  | 0.02570368  | 0.02625256  | 0.01265974        | -0.00015805 | 0.03647139  | 0.03835797  |
| 1.00  | 0.00311585    | -0.00613202 | 0.01000160  | 0.01124576  | 0.01102630       | 0.00358945  | 0.03209891  | 0.03303936  | 0.01416451        | -0.00261964 | 0.04203929  | 0.04431296  |
| 0.75  | 0.00220467    | -0.00231236 | 0.00741866  | 0.00845526  | 0.01428971       | -0.00453958 | 0.04367309  | 0.04543396  | 0.01651242        | -0.00690573 | 0.05106086  | 0.05390893  |
| 0.50  | 0.00115905    | 0.00333105  | 0.00407724  | 0.00465222  | 0.01726205       | -0.01405909 | 0.05469986  | 0.05735117  | 0.01843149        | -0.01069081 | 0.05873608  | 0.06201245  |
| 0.25  | 0.00032103    | 0.00115172  | 0.00132757  | 0.00853672  | 0.01936488       | -0.02186396 | 0.06275804  | 0.06611678  | 0.01968894        | -0.01325637 | 0.06390999  | 0.06744510  |
| 0.00  | 0.00000000    | 0.00000000  | 0.00000023  | 0.01063281  | 0.02012667       | -0.02489436 | 0.06572755  | 0.06935795  | 0.02012667        | -0.01415930 | 0.06572768  | 0.06935796  |
| -0.25 | 0.00032103    | 0.00115172  | 0.00132757  | 0.00853672  | 0.01936488       | -0.02186396 | 0.06275804  | 0.06611678  | 0.01968894        | -0.01325637 | 0.06390999  | 0.06744510  |
| -0.50 | 0.00115905    | 0.00333105  | 0.00407724  | 0.00465222  | 0.01726205       | -0.01405909 | 0.05469986  | 0.05735117  | 0.01843149        | -0.01069081 | 0.05873608  | 0.06201245  |
| -0.75 | 0.00220467    | -0.00231236 | 0.00741866  | 0.00845526  | 0.01428971       | -0.00453958 | 0.04367309  | 0.04543396  | 0.01651242        | -0.00690573 | 0.05106086  | 0.05390893  |
| -1.00 | 0.00311585    | -0.00613202 | 0.01000160  | 0.01124576  | 0.01102630       | 0.00358945  | 0.03209891  | 0.03303936  | 0.01416451        | -0.00261964 | 0.04203929  | 0.04431296  |
| -1.15 | 0.00349383    | -0.00707328 | 0.01084864  | 0.01207496  | 0.00914327       | 0.00698598  | 0.02570368  | 0.02625256  | 0.01265974        | -0.00015805 | 0.03647139  | 0.03835797  |
| -1.25 | 0.00365882    | -0.00715215 | 0.01108916  | 0.01225026  | 0.00797038       | 0.00854391  | 0.02183859  | 0.02217672  | 0.01165111        | 0.00133179  | 0.03283436  | 0.03445816  |
| -1.44 | 0.00377852    | -0.00634110 | 0.01088822  | 0.01184051  | 0.00599340       | 0.01003295  | 0.01556350  | 0.01560693  | 0.00979087        | 0.00366491  | 0.02633402  | 0.02747804  |
| -1.60 | 0.00370177    | -0.00500602 | 0.01016664  | 0.01089284  | 0.00458926       | 0.01001166  | 0.01121095  | 0.01136780  | 0.00830647        | 0.00505704  | 0.02135306  | 0.02213239  |
| -1.75 | 0.00351320    | -0.00355008 | 0.00918487  | 0.00969524  | 0.00351420       | 0.00803449  | 0.00810944  | 0.00947408  | 0.00703929        | 0.00584158  | 0.01726226  | 0.01775572  |
| -2.00 | 0.00303719    | -0.00127505 | 0.00723968  | 0.00744168  | 0.00217825       | 0.00439169  | 0.00453285  | 0.00746686  | 0.00522193        | 0.00617080  | 0.01170206  | 0.01185501  |
| -2.50 | 0.00193551    | 0.00117601  | 0.00358444  | 0.00370046  | 0.00076412       | 0.00113246  | 0.00120265  | 0.00345899  | 0.00269997        | 0.00461461  | 0.00472831  | 0.00486519  |
| -3.00 | 0.00108008    | 0.00134231  | 0.00147553  | 0.00162367  | 0.00025151       | 0.00026299  | 0.00027702  | 0.00125949  | 0.00133067        | 0.00174356  | 0.00183932  | 0.00262816  |
| -4.00 | 0.00026428    | 0.00022665  | 0.00025434  | 0.00055455  | 0.00002474       | 0.00001373  | 0.00001556  | 0.00013765  | 0.00028855        | 0.00024309  | 0.00026279  | 0.00069047  |
| -5.00 | 0.00004442    | 0.00003150  | 0.00003770  | 0.00015885  | 0.00000174       | 0.00000071  | 0.00000090  | 0.00001385  | 0.00004598        | 0.00003257  | 0.00003779  | 0.00017226  |



**T2 (continued).** The values of electron density and its Hessian's eigenvalues of  $\rho_{total}$ ,  $\rho_{\sigma}$  and  $\rho_{\pi}$  in atomic units for C<sub>6</sub>H<sub>6</sub>BH. The highlighted cells display the position of RCPs of  $\rho_{\pi}$ .

| R(Å)  | $\rho(r)_{\pi}$ |             |             |             | $\rho(r)_{\sigma}$ |             |             |             | $\rho(r)_{total}$ |             |             |             |
|-------|-----------------|-------------|-------------|-------------|--------------------|-------------|-------------|-------------|-------------------|-------------|-------------|-------------|
|       | $\rho$          | $\lambda_1$ | $\lambda_2$ | $\lambda_3$ | $\rho$             | $\lambda_1$ | $\lambda_2$ | $\lambda_3$ | $\rho$            | $\lambda_1$ | $\lambda_2$ | $\lambda_3$ |
| 5.00  | 0.00005258      | 0.00003352  | 0.00004335  | 0.00013941  | 0.00000361         | 0.00000022  | 0.00000192  | 0.00002165  | 0.00005595        | 0.00003624  | 0.00004352  | 0.00016036  |
| 4.00  | 0.00024366      | 0.00020382  | 0.00025402  | 0.00039279  | 0.00003539         | 0.00001299  | 0.00002715  | 0.00015429  | 0.00027834        | 0.00023538  | 0.00026665  | 0.00054377  |
| 3.00  | 0.00080493      | 0.00046164  | 0.00106671  | 0.00119441  | 0.00025753         | 0.00020824  | 0.00031679  | 0.00089187  | 0.00106081        | 0.00117015  | 0.00140065  | 0.00157585  |
| 2.50  | 0.00125470      | 0.00002738  | 0.00210212  | 0.00239928  | 0.00064005         | 0.00077439  | 0.00105862  | 0.00194629  | 0.00189290        | 0.00184476  | 0.00316918  | 0.00331311  |
| 2.00  | 0.00169458      | -0.00118624 | 0.00360768  | 0.00420091  | 0.00149541         | 0.00260003  | 0.00300136  | 0.00370430  | 0.00318891        | 0.00210152  | 0.00679298  | 0.00707156  |
| 1.80  | 0.00180709      | -0.00182765 | 0.00419824  | 0.00492776  | 0.00204648         | 0.00366032  | 0.00402802  | 0.00515217  | 0.00385313        | 0.00190728  | 0.00894672  | 0.00933014  |
| 1.61  | 0.00184713      | -0.00238157 | 0.00463273  | 0.00547568  | 0.00271011         | 0.00384721  | 0.00592650  | 0.00724007  | 0.00455751        | 0.00148579  | 0.01139253  | 0.01191264  |
| 1.40  | 0.00179197      | -0.00273736 | 0.00484662  | 0.00576561  | 0.00359696         | 0.00347176  | 0.00869685  | 0.01026241  | 0.00538995        | 0.00073394  | 0.01445285  | 0.01517162  |
| 1.20  | 0.00162913      | -0.00263537 | 0.00469475  | 0.00561149  | 0.00458502         | 0.00239638  | 0.01202800  | 0.01382979  | 0.00621570        | -0.00024600 | 0.01763068  | 0.01859101  |
| 1.00  | 0.00136291      | -0.00196259 | 0.00414890  | 0.00497415  | 0.00566648         | 0.00056364  | 0.01590956  | 0.01791639  | 0.00703118        | -0.00140531 | 0.02087630  | 0.02212399  |
| 0.75  | 0.00092783      | -0.00033929 | 0.00299143  | 0.00358668  | 0.00703642         | -0.00258640 | 0.02111406  | 0.02331180  | 0.00796582        | -0.00292242 | 0.02469558  | 0.02633909  |
| 0.50  | 0.00047430      | 0.00149231  | 0.00185613  | 0.00191436  | 0.00824383         | -0.00602357 | 0.02592493  | 0.02823765  | 0.00871906        | -0.00425807 | 0.02783152  | 0.02985030  |
| 0.25  | 0.00012915      | 0.00044270  | 0.00053166  | 0.00355298  | 0.00907917         | -0.00872329 | 0.02936069  | 0.03172811  | 0.00920860        | -0.00516646 | 0.02989130  | 0.03218072  |
| 0.00  | 0.00000000      | 0.00000000  | 0.00000021  | 0.00425330  | 0.00937839         | -0.00974983 | 0.03061107  | 0.03299364  | 0.00937839        | -0.00548727 | 0.03061134  | 0.03299370  |
| -0.25 | 0.00012915      | 0.00044270  | 0.00053166  | 0.00355298  | 0.00907917         | -0.00872329 | 0.02936069  | 0.03172811  | 0.00920860        | -0.00516646 | 0.02989130  | 0.03218072  |
| -0.50 | 0.00047430      | 0.00149231  | 0.00185613  | 0.00191436  | 0.00824383         | -0.00602357 | 0.02592493  | 0.02823765  | 0.00871906        | -0.00425807 | 0.02783152  | 0.02985030  |
| -0.75 | 0.00092783      | -0.00033929 | 0.00299143  | 0.00358668  | 0.00703642         | -0.00258640 | 0.02111406  | 0.02331180  | 0.00796582        | -0.00292242 | 0.02469558  | 0.02633909  |
| -1.00 | 0.00136291      | -0.00196259 | 0.00414890  | 0.00497415  | 0.00566648         | 0.00056364  | 0.01590956  | 0.01791639  | 0.00703118        | -0.00140531 | 0.02087630  | 0.02212399  |
| -1.20 | 0.00162913      | -0.00263537 | 0.00469475  | 0.00561149  | 0.00458502         | 0.00239638  | 0.01202800  | 0.01382979  | 0.00621570        | -0.00024600 | 0.01763068  | 0.01859101  |
| -1.40 | 0.00179197      | -0.00273736 | 0.00484662  | 0.00576561  | 0.00359696         | 0.00347176  | 0.00869685  | 0.01026241  | 0.00538995        | 0.00073394  | 0.01445285  | 0.01517162  |
| -1.61 | 0.00184713      | -0.00238157 | 0.00463273  | 0.00547568  | 0.00271011         | 0.00384721  | 0.00592650  | 0.00724007  | 0.00455751        | 0.00148579  | 0.01139253  | 0.01191264  |
| -1.80 | 0.00180709      | -0.00182765 | 0.00419824  | 0.00492776  | 0.00204648         | 0.00366032  | 0.00402802  | 0.00515217  | 0.00385313        | 0.00190728  | 0.00894672  | 0.00933014  |
| -2.00 | 0.00169458      | -0.00118624 | 0.00360768  | 0.00420091  | 0.00149541         | 0.00260003  | 0.00300136  | 0.00370430  | 0.00318891        | 0.00210152  | 0.00679298  | 0.00707156  |
| -2.50 | 0.00125470      | 0.00002738  | 0.00210212  | 0.00239928  | 0.00064005         | 0.00077439  | 0.00105862  | 0.00194629  | 0.00189290        | 0.00184476  | 0.00316918  | 0.00331311  |
| -3.00 | 0.00080493      | 0.00046164  | 0.00106671  | 0.00119441  | 0.00025753         | 0.00020824  | 0.00031679  | 0.00089187  | 0.00106081        | 0.00117015  | 0.00140065  | 0.00157585  |
| -4.00 | 0.00024366      | 0.00020382  | 0.00025402  | 0.00039279  | 0.00003539         | 0.00001299  | 0.00002715  | 0.00015429  | 0.00027834        | 0.00023538  | 0.00026665  | 0.00054377  |
| -5.00 | 0.00005258      | 0.00003352  | 0.00004335  | 0.00013941  | 0.00000361         | 0.00000022  | 0.00000192  | 0.00002165  | 0.00005595        | 0.00003624  | 0.00004352  | 0.00016036  |

**T2 (continued).** The values of electron density and its Hessian's eigenvalues of  $\rho_{total}$ ,  $\rho_{\sigma}$  and  $\rho_{\pi}$  in atomic units for C<sub>6</sub>H<sub>6</sub>AlH. The highlighted cells display the position of RCPs of  $\rho_{\pi}$ .

| R(Å)  | $\rho(r)_{\pi}$ |             |             |             | $\rho(r)_{\sigma}$ |             |             |             | $\rho(r)_{total}$ |             |             |             |
|-------|-----------------|-------------|-------------|-------------|--------------------|-------------|-------------|-------------|-------------------|-------------|-------------|-------------|
|       | $\rho$          | $\lambda_1$ | $\lambda_2$ | $\lambda_3$ | $\rho$             | $\lambda_1$ | $\lambda_2$ | $\lambda_3$ | $\rho$            | $\lambda_1$ | $\lambda_2$ | $\lambda_3$ |
| 5.00  | 0.00005775      | 0.00002453  | 0.00004512  | 0.00012382  | 0.00001050         | 0.00000046  | 0.00000069  | 0.00003772  | 0.00006672        | 0.00002967  | 0.00004540  | 0.00015792  |
| 4.00  | 0.00022708      | 0.00014978  | 0.00024462  | 0.00029211  | 0.00005992         | 0.00001601  | 0.00002658  | 0.00021318  | 0.00028340        | 0.00019812  | 0.00025814  | 0.00049310  |
| 3.00  | 0.00065321      | 0.00017707  | 0.00071423  | 0.00097691  | 0.00032427         | 0.00019015  | 0.00028679  | 0.00093939  | 0.00097211        | 0.00080417  | 0.00115837  | 0.00136467  |
| 2.50  | 0.00094114      | -0.00021765 | 0.00131288  | 0.00174719  | 0.00070334         | 0.00062352  | 0.00084533  | 0.00173662  | 0.00164077        | 0.00112672  | 0.00235798  | 0.00265773  |
| 2.00  | 0.00116792      | -0.00093845 | 0.00208894  | 0.00272605  | 0.00142920         | 0.00186850  | 0.00187260  | 0.00313113  | 0.00259892        | 0.00111401  | 0.00458026  | 0.00522354  |
| 1.75  | 0.00120618      | -0.00131152 | 0.00242059  | 0.00314109  | 0.00198286         | 0.00212277  | 0.00307986  | 0.00454922  | 0.00319476        | 0.00084982  | 0.00620796  | 0.00714692  |
| 1.50  | 0.00116419      | -0.00151512 | 0.00258118  | 0.00333763  | 0.00264923         | 0.00191396  | 0.00475946  | 0.00656012  | 0.00382269        | 0.00038128  | 0.00808683  | 0.00939040  |
| 1.30  | 0.00106397      | -0.00145931 | 0.00253329  | 0.00326835  | 0.00327634         | 0.00134532  | 0.00651653  | 0.00863026  | 0.00435153        | -0.00014639 | 0.00977757  | 0.01142443  |
| 1.00  | 0.00080972      | -0.00087008 | 0.00210950  | 0.00270949  | 0.00430506         | -0.00020904 | 0.00969348  | 0.01227341  | 0.00512623        | -0.00110273 | 0.01240010  | 0.01460212  |
| 0.75  | 0.00053751      | 0.00004828  | 0.00149304  | 0.00189601  | 0.00515408         | -0.00197989 | 0.01254025  | 0.01545032  | 0.00570056        | -0.00192435 | 0.01443597  | 0.01708551  |
| 0.50  | 0.00026972      | 0.00072664  | 0.00098306  | 0.00119886  | 0.00588128         | -0.00379921 | 0.01511346  | 0.01826674  | 0.00615602        | -0.00262750 | 0.01609725  | 0.01912045  |
| 0.25  | 0.00007261      | 0.00020890  | 0.00026476  | 0.00204414  | 0.00637492         | -0.00517809 | 0.01692288  | 0.02022125  | 0.00644898        | -0.00309811 | 0.01718820  | 0.02045659  |
| 0.00  | 0.00000000      | 0.00000000  | 0.00000033  | 0.00238221  | 0.00655007         | -0.00569363 | 0.01757616  | 0.02092226  | 0.00655007        | -0.00326315 | 0.01757646  | 0.02092226  |
| -0.25 | 0.00007261      | 0.00020890  | 0.00026476  | 0.00204414  | 0.00637492         | -0.00517809 | 0.01692288  | 0.02022125  | 0.00644898        | -0.00309811 | 0.01718820  | 0.02045659  |
| -0.50 | 0.00026972      | 0.00072664  | 0.00098306  | 0.00119886  | 0.00588128         | -0.00379921 | 0.01511346  | 0.01826674  | 0.00615602        | -0.00262750 | 0.01609725  | 0.01912045  |
| -0.75 | 0.00053751      | 0.00004828  | 0.00149304  | 0.00189601  | 0.00515408         | -0.00197989 | 0.01254025  | 0.01545032  | 0.00570056        | -0.00192435 | 0.01443597  | 0.01708551  |
| -1.00 | 0.00080972      | -0.00087008 | 0.00210950  | 0.00270949  | 0.00430506         | -0.00020904 | 0.00969348  | 0.01227341  | 0.00512623        | -0.00110273 | 0.01240010  | 0.01460212  |
| -1.30 | 0.00106397      | -0.00145931 | 0.00253329  | 0.00326835  | 0.00327634         | 0.00134532  | 0.00651653  | 0.00863026  | 0.00435153        | -0.00014639 | 0.00977757  | 0.01142443  |
| -1.50 | 0.00116419      | -0.00151512 | 0.00258118  | 0.00333763  | 0.00264923         | 0.00191396  | 0.00475946  | 0.00656012  | 0.00382269        | 0.00038128  | 0.00808683  | 0.00939040  |
| -1.75 | 0.00120618      | -0.00131152 | 0.00242059  | 0.00314109  | 0.00198286         | 0.00212277  | 0.00307986  | 0.00454922  | 0.00319476        | 0.00084982  | 0.00620796  | 0.00714692  |
| -2.00 | 0.00116792      | -0.00093845 | 0.00208894  | 0.00272605  | 0.00142920         | 0.00186850  | 0.00187260  | 0.00313113  | 0.00259892        | 0.00111401  | 0.00458026  | 0.00522354  |
| -2.50 | 0.00094114      | -0.00021765 | 0.00131288  | 0.00174719  | 0.00070334         | 0.00062352  | 0.00084533  | 0.00173662  | 0.00164077        | 0.00112672  | 0.00235798  | 0.00265773  |
| -3.00 | 0.00065321      | 0.00017707  | 0.00071423  | 0.00097691  | 0.00032427         | 0.00019015  | 0.00028679  | 0.00093939  | 0.00097211        | 0.00080417  | 0.00115837  | 0.00136467  |
| -4.00 | 0.00022708      | 0.00014978  | 0.00024462  | 0.00029211  | 0.00005992         | 0.00001601  | 0.00002658  | 0.00021318  | 0.00028340        | 0.00019812  | 0.00025814  | 0.00049310  |
| -5.00 | 0.00005775      | 0.00002453  | 0.00004512  | 0.00012382  | 0.00001050         | 0.00000046  | 0.00000069  | 0.00003772  | 0.00006672        | 0.00002967  | 0.00004540  | 0.00015792  |

**T2 (continued).** The values of electron density and its Hessian's eigenvalues of  $\rho_{total}$ ,  $\rho_{\sigma}$  and  $\rho_{\pi}$  in atomic units for  $C_6H_6SiH^+$ . The highlighted cells display the position of RCPs of  $\rho_{\pi}$ .

| R(Å)  | $\rho(r)_{\pi}$ |             |             |             | $\rho(r)_{\sigma}$ |             |             |             | $\rho(r)_{total}$ |             |             |             |
|-------|-----------------|-------------|-------------|-------------|--------------------|-------------|-------------|-------------|-------------------|-------------|-------------|-------------|
|       | $\rho$          | $\lambda_1$ | $\lambda_2$ | $\lambda_3$ | $\rho$             | $\lambda_1$ | $\lambda_2$ | $\lambda_3$ | $\rho$            | $\lambda_1$ | $\lambda_2$ | $\lambda_3$ |
| 5.00  | 0.00004321      | 0.00003079  | 0.00003509  | 0.00013581  | 0.00000444         | -0.00000028 | 0.00000181  | 0.00002423  | 0.00004830        | 0.00003059  | 0.00003525  | 0.00016230  |
| 4.00  | 0.00021727      | 0.00019851  | 0.00020589  | 0.00038245  | 0.00003835         | 0.00001053  | 0.00002860  | 0.00015555  | 0.00025779        | 0.00020981  | 0.00022825  | 0.00054412  |
| 3.00  | 0.00072212      | 0.00034375  | 0.00093842  | 0.00108975  | 0.00025614         | 0.00017523  | 0.00032158  | 0.00083368  | 0.00098315        | 0.00096393  | 0.00111718  | 0.00161549  |
| 2.50  | 0.00110576      | -0.00009169 | 0.00183672  | 0.00207426  | 0.00061122         | 0.00062522  | 0.00101087  | 0.00172549  | 0.00172255        | 0.00141647  | 0.00246801  | 0.00327582  |
| 2.00  | 0.00145432      | -0.00110398 | 0.00310741  | 0.00344505  | 0.00136502         | 0.00200926  | 0.00245142  | 0.00338730  | 0.00282347        | 0.00148911  | 0.00512498  | 0.00663726  |
| 1.66  | 0.00155153      | -0.00190114 | 0.00387222  | 0.00424398  | 0.00224314         | 0.00289108  | 0.00406951  | 0.00606338  | 0.00379640        | 0.00101593  | 0.00795018  | 0.01021267  |
| 1.50  | 0.00152764      | -0.00213085 | 0.00405709  | 0.00442606  | 0.00275104         | 0.00273457  | 0.00541242  | 0.00780027  | 0.00427918        | 0.00061842  | 0.00947747  | 0.01213961  |
| 1.30  | 0.00142177      | -0.00216395 | 0.00405553  | 0.00440174  | 0.00349927         | 0.00210178  | 0.00754538  | 0.01050050  | 0.00492011        | -0.00005110 | 0.01160771  | 0.01481952  |
| 1.15  | 0.00128613      | -0.00192930 | 0.00384477  | 0.00416065  | 0.00411665         | 0.00127274  | 0.00942071  | 0.01282501  | 0.00540103        | -0.00064455 | 0.01327111  | 0.01690583  |
| 1.00  | 0.00110761      | -0.00144454 | 0.00344943  | 0.00372604  | 0.00476224         | 0.00014790  | 0.01147616  | 0.01533050  | 0.00586761        | -0.00128233 | 0.01492994  | 0.01898097  |
| 0.75  | 0.00074663      | -0.00014288 | 0.00245525  | 0.00265858  | 0.00583022         | -0.00221924 | 0.01505717  | 0.01961313  | 0.00657464        | -0.00234015 | 0.01751469  | 0.02220337  |
| 0.50  | 0.00037887      | 0.00122792  | 0.00129112  | 0.00165870  | 0.00675960         | -0.00472987 | 0.01833054  | 0.02345649  | 0.00713707        | -0.00323708 | 0.01962241  | 0.02481974  |
| 0.25  | 0.00010270      | 0.00035331  | 0.00037877  | 0.00285554  | 0.00739703         | -0.00666811 | 0.02064970  | 0.02614648  | 0.00749930        | -0.00383026 | 0.02100302  | 0.02652417  |
| 0.00  | 0.00000000      | 0.00000000  | 0.00000015  | 0.00337683  | 0.00762435         | -0.00739900 | 0.02149020  | 0.02711550  | 0.00762435        | -0.00403659 | 0.02149037  | 0.02711550  |
| -0.25 | 0.00010270      | 0.00035331  | 0.00037877  | 0.00285554  | 0.00739703         | -0.00666811 | 0.02064970  | 0.02614648  | 0.00749930        | -0.00383026 | 0.02100302  | 0.02652417  |
| -0.50 | 0.00037887      | 0.00122792  | 0.00129112  | 0.00165870  | 0.00675960         | -0.00472987 | 0.01833054  | 0.02345649  | 0.00713707        | -0.00323708 | 0.01962241  | 0.02481974  |
| -0.75 | 0.00074663      | -0.00014288 | 0.00245525  | 0.00265858  | 0.00583022         | -0.00221924 | 0.01505717  | 0.01961313  | 0.00657464        | -0.00234015 | 0.01751469  | 0.02220337  |
| -1.00 | 0.00110761      | -0.00144454 | 0.00344943  | 0.00372604  | 0.00476224         | 0.00014790  | 0.01147616  | 0.01533050  | 0.00586761        | -0.00128233 | 0.01492994  | 0.01898097  |
| -1.15 | 0.00128613      | -0.00192930 | 0.00384477  | 0.00416065  | 0.00411665         | 0.00127274  | 0.00942071  | 0.01282501  | 0.00540103        | -0.00064455 | 0.01327111  | 0.01690583  |
| -1.30 | 0.00142177      | -0.00216395 | 0.00405553  | 0.00440174  | 0.00349927         | 0.00210178  | 0.00754538  | 0.01050050  | 0.00492011        | -0.00005110 | 0.01160771  | 0.01481952  |
| -1.50 | 0.00152764      | -0.00213085 | 0.00405709  | 0.00442606  | 0.00275104         | 0.00273457  | 0.00541242  | 0.00780027  | 0.00427918        | 0.00061842  | 0.00947747  | 0.01213961  |
| -1.66 | 0.00155153      | -0.00190114 | 0.00387222  | 0.00424398  | 0.00224314         | 0.00289108  | 0.00406951  | 0.00606338  | 0.00379640        | 0.00101593  | 0.00795018  | 0.01021267  |
| -2.00 | 0.00145432      | -0.00110398 | 0.00310741  | 0.00344505  | 0.00136502         | 0.00200926  | 0.00245142  | 0.00338730  | 0.00282347        | 0.00148911  | 0.00512498  | 0.00663726  |
| -2.50 | 0.00110576      | -0.00009169 | 0.00183672  | 0.00207426  | 0.00061122         | 0.00062522  | 0.00101087  | 0.00172549  | 0.00172255        | 0.00141647  | 0.00246801  | 0.00327582  |
| -3.00 | 0.00072212      | 0.00034375  | 0.00093842  | 0.00108975  | 0.00025614         | 0.00017523  | 0.00032158  | 0.00083368  | 0.00098315        | 0.00096393  | 0.00111718  | 0.00161549  |
| -4.00 | 0.00021727      | 0.00019851  | 0.00020589  | 0.00038245  | 0.00003835         | 0.00001053  | 0.00002860  | 0.00015555  | 0.00025779        | 0.00020981  | 0.00022825  | 0.00054412  |
| -5.00 | 0.00004321      | 0.00003079  | 0.00003509  | 0.00013581  | 0.00000444         | -0.00000028 | 0.00000181  | 0.00002423  | 0.00004830        | 0.00003059  | 0.00003525  | 0.00016230  |

**T2 (continued).** The values of electron density and its Hessian's eigenvalues of  $\rho_{total}$ ,  $\rho_{\sigma}$  and  $\rho_{\pi}$  in atomic units for  $C_6H_6N^+$ . The highlighted cells display the position of RCPs of  $\rho_{\pi}$ .

| R(Å)  | $\rho(r)_{\pi}$ |             |             |             | $\rho(r)_{\sigma}$ |             |             |             | $\rho(r)_{total}$ |             |             |             |
|-------|-----------------|-------------|-------------|-------------|--------------------|-------------|-------------|-------------|-------------------|-------------|-------------|-------------|
|       | $\rho$          | $\lambda_1$ | $\lambda_2$ | $\lambda_3$ | $\rho$             | $\lambda_1$ | $\lambda_2$ | $\lambda_3$ | $\rho$            | $\lambda_1$ | $\lambda_2$ | $\lambda_3$ |
| 5.00  | 0.00002697      | 0.00001814  | 0.00002937  | 0.00010815  | 0.00000142         | 0.00000007  | 0.00000116  | 0.00001214  | 0.00002894        | 0.00001716  | 0.00003062  | 0.00012269  |
| 4.00  | 0.00017248      | 0.00015906  | 0.00019909  | 0.00038378  | 0.00002142         | 0.00000575  | 0.00001737  | 0.00011748  | 0.00019645        | 0.00015749  | 0.00021729  | 0.00050850  |
| 3.00  | 0.00070480      | 0.00070135  | 0.00102749  | 0.00112172  | 0.00020324         | 0.00016579  | 0.00023891  | 0.00085729  | 0.00091449        | 0.00113211  | 0.00136548  | 0.00161678  |
| 2.50  | 0.00120925      | 0.00040052  | 0.00228585  | 0.00249662  | 0.00056649         | 0.00071694  | 0.00091631  | 0.00208744  | 0.00178492        | 0.00238870  | 0.00309722  | 0.00342272  |
| 2.00  | 0.00179013      | -0.00100495 | 0.00437940  | 0.00478356  | 0.00005116         | 0.00268351  | 0.00322002  | 0.00411053  | 0.00327151        | 0.00306659  | 0.00707883  | 0.00801926  |
| 1.70  | 0.00204205      | -0.00236102 | 0.00574212  | 0.00624006  | 0.00246820         | 0.00507201  | 0.00545000  | 0.00628900  | 0.00452273        | 0.00272653  | 0.01112973  | 0.01254756  |
| 1.50  | 0.00210007      | -0.00318305 | 0.00641576  | 0.00693368  | 0.00337833         | 0.00520680  | 0.00821256  | 0.00936758  | 0.00549040        | 0.00200801  | 0.01458033  | 0.01632033  |
| 1.30  | 0.00203201      | -0.00362399 | 0.00669026  | 0.00718223  | 0.00450318         | 0.00449090  | 0.01197646  | 0.01343045  | 0.00654589        | 0.00085126  | 0.01860648  | 0.02063062  |
| 1.15  | 0.00188738      | -0.00351704 | 0.00653058  | 0.00697397  | 0.00546210         | 0.00326946  | 0.01540539  | 0.01706775  | 0.00735876        | -0.00026109 | 0.02187089  | 0.02405757  |
| 1.00  | 0.00166453      | -0.00293532 | 0.00601934  | 0.00639496  | 0.00649340         | 0.00142184  | 0.01928254  | 0.02112460  | 0.00816552        | -0.00152345 | 0.02523762  | 0.02753240  |
| 0.75  | 0.00115989      | -0.00090623 | 0.00445732  | 0.00469948  | 0.00825477         | -0.00282861 | 0.02629069  | 0.02834123  | 0.00941928        | -0.00373566 | 0.03069702  | 0.03304752  |
| 0.50  | 0.00060307      | 0.00191890  | 0.00244166  | 0.00254113  | 0.00983623         | -0.00765691 | 0.03294063  | 0.03508179  | 0.01044141        | -0.00570816 | 0.03533402  | 0.03762405  |
| 0.25  | 0.00016591      | 0.00068027  | 0.00071777  | 0.00447082  | 0.01094412         | -0.01154010 | 0.03777724  | 0.03993226  | 0.01111056        | -0.00705660 | 0.03845313  | 0.04064965  |
| 0.00  | 0.00000000      | 0.00000000  | 0.00000006  | 0.00548299  | 0.01134346         | -0.01303330 | 0.03955402  | 0.04170464  | 0.01134346        | -0.00753345 | 0.03955406  | 0.04170467  |
| -0.25 | 0.00016591      | 0.00068027  | 0.00071777  | 0.00447082  | 0.01094412         | -0.01154010 | 0.03777724  | 0.03993226  | 0.01111056        | -0.00705660 | 0.03845313  | 0.04064965  |
| -0.50 | 0.00060307      | 0.00191890  | 0.00244166  | 0.00254113  | 0.00983623         | -0.00765691 | 0.03294063  | 0.03508179  | 0.01044141        | -0.00570816 | 0.03533402  | 0.03762405  |
| -0.75 | 0.00115989      | -0.00090623 | 0.00445732  | 0.00469948  | 0.00825477         | -0.00282861 | 0.02629069  | 0.02834123  | 0.00941928        | -0.00373566 | 0.03069702  | 0.03304752  |
| -1.00 | 0.00166453      | -0.00293532 | 0.00601934  | 0.00639496  | 0.00649340         | 0.00142184  | 0.01928254  | 0.02112460  | 0.00816552        | -0.00152345 | 0.02523762  | 0.02753240  |
| -1.15 | 0.00188738      | -0.00351704 | 0.00653058  | 0.00697397  | 0.00546210         | 0.00326946  | 0.01540539  | 0.01706775  | 0.00735876        | -0.00026109 | 0.02187089  | 0.02405757  |
| -1.30 | 0.00203201      | -0.00362399 | 0.00669026  | 0.00718223  | 0.00450318         | 0.00449090  | 0.01197646  | 0.01343045  | 0.00654589        | 0.00085126  | 0.01860648  | 0.02063062  |
| -1.50 | 0.00210007      | -0.00318305 | 0.00641576  | 0.00693368  | 0.00337833         | 0.00520680  | 0.00821256  | 0.00936758  | 0.00549040        | 0.00200801  | 0.01458033  | 0.01632033  |
| -1.70 | 0.00204205      | -0.00236102 | 0.00574212  | 0.00624006  | 0.00246820         | 0.00507201  | 0.00545000  | 0.00628900  | 0.00452273        | 0.00272653  | 0.01112973  | 0.01254756  |
| -2.00 | 0.00179013      | -0.00100495 | 0.00437940  | 0.00478356  | 0.00005116         | 0.00268351  | 0.00322002  | 0.00411053  | 0.00327151        | 0.00306659  | 0.00707883  | 0.00801926  |
| -2.50 | 0.00120925      | 0.00040052  | 0.00228585  | 0.00249662  | 0.00056649         | 0.00071694  | 0.00091631  | 0.00208744  | 0.00178492        | 0.00238870  | 0.00309722  | 0.00342272  |
| -3.00 | 0.00070480      | 0.00070135  | 0.00102749  | 0.00112172  | 0.00020324         | 0.00016579  | 0.00023891  | 0.00085729  | 0.00091449        | 0.00113211  | 0.00136548  | 0.00161678  |
| -4.00 | 0.00017248      | 0.00015906  | 0.00019909  | 0.00038378  | 0.00002142         | 0.00000575  | 0.00001737  | 0.00011748  | 0.00019645        | 0.00015749  | 0.00021729  | 0.00050850  |
| -5.00 | 0.00002697      | 0.00001814  | 0.00002937  | 0.00010815  | 0.00000142         | 0.00000007  | 0.00000116  | 0.00001214  | 0.00002894        | 0.00001716  | 0.00003062  | 0.00012269  |

**T2 (continued).** The values of electron density and its Hessian's eigenvalues of  $\rho_{total}$ ,  $\rho_{\sigma}$  and  $\rho_{\pi}$  in atomic units for  $C_6H_6NH$ . The highlighted cells display the position of RCPs of  $\rho_{\pi}$ .

| R(Å)  | $\rho(r)_{\pi}$ |             |             |             | $\rho(r)_{\sigma}$ |             |             |             | $\rho(r)_{total}$ |             |             |             |
|-------|-----------------|-------------|-------------|-------------|--------------------|-------------|-------------|-------------|-------------------|-------------|-------------|-------------|
|       | $\rho$          | $\lambda_1$ | $\lambda_2$ | $\lambda_3$ | $\rho$             | $\lambda_1$ | $\lambda_2$ | $\lambda_3$ | $\rho$            | $\lambda_1$ | $\lambda_2$ | $\lambda_3$ |
| 5.00  | 0.00004079      | 0.00001651  | 0.00004698  | 0.00012418  | 0.00000178         | 0.00000018  | 0.00000149  | 0.00001397  | 0.00004265        | 0.00001676  | 0.00004837  | 0.00013843  |
| 4.00  | 0.00021054      | 0.00013207  | 0.00026829  | 0.00037632  | 0.00002382         | 0.00000708  | 0.00002092  | 0.00011857  | 0.00023468        | 0.00013935  | 0.00028868  | 0.00049554  |
| 3.00  | 0.00074830      | 0.00054768  | 0.00082949  | 0.00127146  | 0.00020136         | 0.00015576  | 0.00025774  | 0.00076596  | 0.00095039        | 0.00095648  | 0.00134420  | 0.00152694  |
| 2.50  | 0.00120981      | 0.00019086  | 0.00179718  | 0.00261019  | 0.00053228         | 0.00062650  | 0.00093528  | 0.00179669  | 0.00174292        | 0.00193313  | 0.00248125  | 0.00354058  |
| 2.00  | 0.00169982      | -0.00106027 | 0.00336306  | 0.00470175  | 0.00132316         | 0.00223262  | 0.00315096  | 0.00346258  | 0.00302364        | 0.00236046  | 0.00564188  | 0.00784306  |
| 1.70  | 0.00188817      | -0.00216595 | 0.00435603  | 0.00596996  | 0.00217982         | 0.00410890  | 0.00458523  | 0.00604187  | 0.00406835        | 0.00206031  | 0.00882807  | 0.01199887  |
| 1.55  | 0.00191575      | -0.00265771 | 0.00473587  | 0.00642802  | 0.00274058         | 0.00430459  | 0.00609184  | 0.00810417  | 0.00465651        | 0.00166600  | 0.01081230  | 0.01451788  |
| 1.30  | 0.00182562      | -0.00308011 | 0.00501259  | 0.00669580  | 0.00390287         | 0.00366207  | 0.00972011  | 0.01267554  | 0.00572833        | 0.00058546  | 0.01473176  | 0.01935583  |
| 1.15  | 0.00168097      | -0.00292362 | 0.00487633  | 0.00645520  | 0.00470924         | 0.00263676  | 0.01245122  | 0.01602774  | 0.00638989        | -0.00028452 | 0.01732689  | 0.02246766  |
| 1.00  | 0.00147132      | -0.00237568 | 0.00448250  | 0.00588413  | 0.00557397         | 0.00109693  | 0.01553602  | 0.01975291  | 0.00704485        | -0.00127607 | 0.02001661  | 0.02562282  |
| 0.75  | 0.00101492      | -0.00060918 | 0.00331032  | 0.00429245  | 0.00704647         | -0.00242584 | 0.02110413  | 0.02635215  | 0.00806093        | -0.00303009 | 0.02440881  | 0.03063391  |
| 0.50  | 0.00052395      | 0.00167174  | 0.00191707  | 0.00231164  | 0.00836509         | -0.00641177 | 0.02637998  | 0.03249095  | 0.00888873        | -0.00461585 | 0.02817088  | 0.03479666  |
| 0.25  | 0.00014354      | 0.00050411  | 0.00065490  | 0.00390056  | 0.00928734         | -0.00961033 | 0.03021317  | 0.03689588  | 0.00943079        | -0.00571387 | 0.03071848  | 0.03754904  |
| 0.00  | 0.00000000      | 0.00000000  | 0.00000012  | 0.00473695  | 0.00961952         | -0.01083898 | 0.03162055  | 0.03850309  | 0.00961952        | -0.00610527 | 0.03162055  | 0.03850321  |
| -0.25 | 0.00014354      | 0.00050411  | 0.00065490  | 0.00390056  | 0.00928734         | -0.00961033 | 0.03021317  | 0.03689588  | 0.00943079        | -0.00571387 | 0.03071848  | 0.03754904  |
| -0.50 | 0.00052395      | 0.00167174  | 0.00191707  | 0.00231164  | 0.00836509         | -0.00641177 | 0.02637998  | 0.03249095  | 0.00888873        | -0.00461585 | 0.02817088  | 0.03479666  |
| -0.75 | 0.00101492      | -0.00060918 | 0.00331032  | 0.00429245  | 0.00704647         | -0.00242584 | 0.02110413  | 0.02635215  | 0.00806093        | -0.00303009 | 0.02440881  | 0.03063391  |
| -1.00 | 0.00147132      | -0.00237568 | 0.00448250  | 0.00588413  | 0.00557397         | 0.00109693  | 0.01553602  | 0.01975291  | 0.00704485        | -0.00127607 | 0.02001661  | 0.02562282  |
| -1.15 | 0.00168097      | -0.00292362 | 0.00487633  | 0.00645520  | 0.00470924         | 0.00263676  | 0.01245122  | 0.01602774  | 0.00638989        | -0.00028452 | 0.01732689  | 0.02246766  |
| -1.30 | 0.00182562      | -0.00308011 | 0.00501259  | 0.00669580  | 0.00390287         | 0.00366207  | 0.00972011  | 0.01267554  | 0.00572833        | 0.00058546  | 0.01473176  | 0.01935583  |
| -1.55 | 0.00191575      | -0.00265771 | 0.00473587  | 0.00642802  | 0.00274058         | 0.00430459  | 0.00609184  | 0.00810417  | 0.00465651        | 0.00166600  | 0.01081230  | 0.01451788  |
| -1.70 | 0.00188817      | -0.00216595 | 0.00435603  | 0.00596996  | 0.00217982         | 0.00410890  | 0.00458523  | 0.00604187  | 0.00406835        | 0.00206031  | 0.00882807  | 0.01199887  |
| -2.00 | 0.00169982      | -0.00106027 | 0.00336306  | 0.00470175  | 0.00132316         | 0.00223262  | 0.00315096  | 0.00346258  | 0.00302364        | 0.00236046  | 0.00564188  | 0.00784306  |
| -2.50 | 0.00120981      | 0.00019086  | 0.00179718  | 0.00261019  | 0.00053228         | 0.00062650  | 0.00093528  | 0.00179669  | 0.00174292        | 0.00193313  | 0.00248125  | 0.00354058  |
| -3.00 | 0.00074830      | 0.00054768  | 0.00082949  | 0.00127146  | 0.00020136         | 0.00015576  | 0.00025774  | 0.00076596  | 0.00095039        | 0.00095648  | 0.00134420  | 0.00152694  |
| -4.00 | 0.00021054      | 0.00013207  | 0.00026829  | 0.00037632  | 0.00002382         | 0.00000708  | 0.00002092  | 0.00011857  | 0.00023468        | 0.00013935  | 0.00028868  | 0.00049554  |
| -5.00 | 0.00004079      | 0.00001651  | 0.00004698  | 0.00012418  | 0.00000178         | 0.00000018  | 0.00000149  | 0.00001397  | 0.00004265        | 0.00001676  | 0.00004837  | 0.00013843  |

**T2 (continued).** The values of electron density and its Hessian's eigenvalues of  $\rho_{total}$ ,  $\rho_\sigma$  and  $\rho_\pi$  in atomic units for  $C_6H_6P^+$ . The highlighted cells display the position of RCPs of  $\rho_\pi$ .

| R(Å)  | $\rho(r)_\pi$ |             |             |             | $\rho(r)_\sigma$ |             |             |             | $\rho(r)_{total}$ |             |             |             |
|-------|---------------|-------------|-------------|-------------|------------------|-------------|-------------|-------------|-------------------|-------------|-------------|-------------|
|       | $\rho$        | $\lambda_1$ | $\lambda_2$ | $\lambda_3$ | $\rho$           | $\lambda_1$ | $\lambda_2$ | $\lambda_3$ | $\rho$            | $\lambda_1$ | $\lambda_2$ | $\lambda_3$ |
| 5.00  | 0.00003747    | 0.00002890  | 0.00003395  | 0.00012489  | 0.00000246       | 0.00000075  | 0.00000104  | 0.00001796  | 0.00003965        | 0.00002964  | 0.00003582  | 0.00014154  |
| 4.00  | 0.00020142    | 0.00019401  | 0.00020384  | 0.00035779  | 0.00003015       | 0.00001393  | 0.00001546  | 0.00014082  | 0.00023055        | 0.00020775  | 0.00022719  | 0.00049027  |
| 3.50  | 0.00039456    | 0.00038788  | 0.00044813  | 0.00053702  | 0.00008792       | 0.00005313  | 0.00005941  | 0.00034494  | 0.00048087        | 0.00050072  | 0.00052388  | 0.00080574  |
| 3.00  | 0.00069262    | 0.00039406  | 0.00098788  | 0.00104311  | 0.00023496       | 0.00020103  | 0.00022705  | 0.00080407  | 0.00092542        | 0.00109398  | 0.00118759  | 0.00137821  |
| 2.50  | 0.00108289    | 0.00000553  | 0.00201679  | 0.00203150  | 0.00058687       | 0.00074168  | 0.00081921  | 0.00171567  | 0.00166763        | 0.00166317  | 0.00277043  | 0.00290758  |
| 2.00  | 0.00146044    | -0.00104102 | 0.00338447  | 0.00360477  | 0.00136321       | 0.00247429  | 0.00252254  | 0.00307191  | 0.00282291        | 0.00185575  | 0.00607470  | 0.00611145  |
| 1.61  | 0.00158787    | -0.00204106 | 0.00425756  | 0.00471118  | 0.00243062       | 0.00332018  | 0.00554242  | 0.00578386  | 0.00401967        | 0.00129472  | 0.01006512  | 0.01024884  |
| 1.30  | 0.00147858    | -0.00234898 | 0.00437151  | 0.00496630  | 0.00366014       | 0.00254877  | 0.00967344  | 0.00973836  | 0.00514130        | 0.00019138  | 0.01415925  | 0.01463563  |
| 1.15  | 0.00134607    | -0.00214303 | 0.00413905  | 0.00475232  | 0.00434042       | 0.00164313  | 0.01207288  | 0.01215564  | 0.00568944        | -0.00051129 | 0.01626253  | 0.01690445  |
| 1.00  | 0.00116591    | -0.00165484 | 0.00371148  | 0.00430041  | 0.00505706       | 0.00038127  | 0.01461700  | 0.01489207  | 0.00622601        | -0.00128406 | 0.01837502  | 0.01918967  |
| 0.75  | 0.00079226    | -0.00026462 | 0.00264851  | 0.00310087  | 0.00625251       | -0.00233522 | 0.01901999  | 0.01969159  | 0.00704730        | -0.00259924 | 0.02169682  | 0.02279084  |
| 0.50  | 0.00040438    | 0.00128603  | 0.00162913  | 0.00165126  | 0.00730129       | -0.00526824 | 0.02301943  | 0.02410845  | 0.00770715        | -0.00374431 | 0.02443230  | 0.02575901  |
| 0.25  | 0.00011000    | 0.00038261  | 0.00046076  | 0.00303330  | 0.00802455       | -0.00755678 | 0.02584156  | 0.02725252  | 0.00813499        | -0.00451660 | 0.02623370  | 0.02771312  |
| 0.00  | 0.00000000    | 0.00000000  | 0.00000000  | 0.00362148  | 0.00828319       | -0.00842414 | 0.02686236  | 0.02839477  | 0.00828319        | -0.00478813 | 0.02686236  | 0.02839477  |
| -0.25 | 0.00011000    | 0.00038261  | 0.00046076  | 0.00303330  | 0.00802455       | -0.00755678 | 0.02584156  | 0.02725252  | 0.00813499        | -0.00451660 | 0.02623370  | 0.02771312  |
| -0.50 | 0.00040438    | 0.00128603  | 0.00162913  | 0.00165126  | 0.00730129       | -0.00526824 | 0.02301943  | 0.02410845  | 0.00770715        | -0.00374431 | 0.02443230  | 0.02575901  |
| -0.75 | 0.00079226    | -0.00026462 | 0.00264851  | 0.00310087  | 0.00625251       | -0.00233522 | 0.01901999  | 0.01969159  | 0.00704730        | -0.00259924 | 0.02169682  | 0.02279084  |
| -1.00 | 0.00116591    | -0.00165484 | 0.00371148  | 0.00430041  | 0.00505706       | 0.00038127  | 0.01461700  | 0.01489207  | 0.00622601        | -0.00128406 | 0.01837502  | 0.01918967  |
| -1.15 | 0.00134607    | -0.00214303 | 0.00413905  | 0.00475232  | 0.00434042       | 0.00164313  | 0.01207288  | 0.01215564  | 0.00568944        | -0.00051129 | 0.01626253  | 0.01690445  |
| -1.30 | 0.00147858    | -0.00234898 | 0.00437151  | 0.00496630  | 0.00366014       | 0.00254877  | 0.00967344  | 0.00973836  | 0.00514130        | 0.00019138  | 0.01415925  | 0.01463563  |
| -1.61 | 0.00158787    | -0.00204106 | 0.00425756  | 0.00471118  | 0.00243062       | 0.00332018  | 0.00554242  | 0.00578386  | 0.00401967        | 0.00129472  | 0.01006512  | 0.01024884  |
| -2.00 | 0.00146044    | -0.00104102 | 0.00338447  | 0.00360477  | 0.00136321       | 0.00247429  | 0.00252254  | 0.00307191  | 0.00282291        | 0.00185575  | 0.00607470  | 0.00611145  |
| -2.50 | 0.00108289    | 0.00000553  | 0.00201679  | 0.00203150  | 0.00058687       | 0.00074168  | 0.00081921  | 0.00171567  | 0.00166763        | 0.00166317  | 0.00277043  | 0.00290758  |
| -3.00 | 0.00069262    | 0.00039406  | 0.00098788  | 0.00104311  | 0.00023496       | 0.00020103  | 0.00022705  | 0.00080407  | 0.00092542        | 0.00109398  | 0.00118759  | 0.00137821  |
| -3.50 | 0.00039456    | 0.00038788  | 0.00044813  | 0.00053702  | 0.00008792       | 0.00005313  | 0.00005941  | 0.00034494  | 0.00048087        | 0.00050072  | 0.00052388  | 0.00080574  |
| -4.00 | 0.00020142    | 0.00019401  | 0.00020384  | 0.00035779  | 0.00003015       | 0.00001393  | 0.00001546  | 0.00014082  | 0.00023055        | 0.00020775  | 0.00022719  | 0.00049027  |
| -5.00 | 0.00003747    | 0.00002890  | 0.00003395  | 0.00012489  | 0.00000246       | 0.00000075  | 0.00000104  | 0.00001796  | 0.00003965        | 0.00002964  | 0.00003582  | 0.00014154  |

**T2 (continued).** The values of electron density and its Hessian's eigenvalues of  $\rho_{total}$ ,  $\rho_{\sigma}$  and  $\rho_{\pi}$  in atomic units for  $C_6H_6O$ . The highlighted cells display the position of RCPs of  $\rho_{\pi}$ .

| R(Å)  | $\rho(r)_{\pi}$ |             |             |             | $\rho(r)_{\sigma}$ |             |             |             | $\rho(r)_{total}$ |             |             |             |
|-------|-----------------|-------------|-------------|-------------|--------------------|-------------|-------------|-------------|-------------------|-------------|-------------|-------------|
|       | $\rho$          | $\lambda_1$ | $\lambda_2$ | $\lambda_3$ | $\rho$             | $\lambda_1$ | $\lambda_2$ | $\lambda_3$ | $\rho$            | $\lambda_1$ | $\lambda_2$ | $\lambda_3$ |
| 5.00  | 0.00004370      | 0.00001123  | 0.00004938  | 0.00012937  | 0.00000191         | -0.00000008 | 0.00000158  | 0.00001426  | 0.00004580        | 0.00001193  | 0.00005050  | 0.00014450  |
| 4.00  | 0.00022206      | 0.00008731  | 0.00029018  | 0.00038779  | 0.00002457         | 0.00000283  | 0.00002162  | 0.00012241  | 0.00024773        | 0.00009341  | 0.00030917  | 0.00051348  |
| 3.50  | 0.00043692      | 0.00023468  | 0.00054525  | 0.00065230  | 0.00007448         | 0.00002230  | 0.00007547  | 0.00032059  | 0.00051349        | 0.00026263  | 0.00072209  | 0.00087081  |
| 3.00  | 0.00078372      | 0.00056853  | 0.00066989  | 0.00143445  | 0.00020995         | 0.00012390  | 0.00027448  | 0.00082384  | 0.00099695        | 0.00074637  | 0.00145609  | 0.00169680  |
| 2.50  | 0.00127396      | 0.00026377  | 0.00147497  | 0.00300646  | 0.00056354         | 0.00055736  | 0.00101577  | 0.00196555  | 0.00184165        | 0.00196246  | 0.00232666  | 0.00399634  |
| 2.00  | 0.00180848      | -0.00108504 | 0.00286981  | 0.00551101  | 0.00142286         | 0.00207337  | 0.00348155  | 0.00380821  | 0.00323521        | 0.00269840  | 0.00501564  | 0.00894192  |
| 1.70  | 0.00202235      | -0.00231842 | 0.00375303  | 0.00705943  | 0.00236144         | 0.00410847  | 0.00472250  | 0.00673407  | 0.00438674        | 0.00236550  | 0.00796043  | 0.01372534  |
| 1.54  | 0.00205858      | -0.00292341 | 0.00411626  | 0.00767453  | 0.00304275         | 0.00477159  | 0.00582509  | 0.00932115  | 0.00510357        | 0.00186289  | 0.00999169  | 0.01691952  |
| 1.30  | 0.00197069      | -0.00337743 | 0.00433692  | 0.00799659  | 0.00425707         | 0.00406448  | 0.00905339  | 0.01426486  | 0.00622888        | 0.00069117  | 0.01345284  | 0.02217885  |
| 1.15  | 0.00181895      | -0.00322695 | 0.00422047  | 0.00773388  | 0.00514571         | 0.00293076  | 0.01160824  | 0.01809322  | 0.00696511        | -0.00029134 | 0.01588752  | 0.02574517  |
| 1.00  | 0.00159545      | -0.00264281 | 0.00387955  | 0.00707009  | 0.00609923         | 0.00122954  | 0.01449773  | 0.02236117  | 0.00769459        | -0.00140714 | 0.01842856  | 0.02935446  |
| 0.75  | 0.00110366      | -0.00071882 | 0.00286293  | 0.00517870  | 0.00772381         | -0.00266274 | 0.01972823  | 0.02995197  | 0.00882691        | -0.00337332 | 0.02262380  | 0.03507188  |
| 0.50  | 0.00057090      | 0.00150964  | 0.00195945  | 0.00279726  | 0.00917931         | -0.00707007 | 0.02470490  | 0.03704324  | 0.00974972        | -0.00514530 | 0.02626981  | 0.03980690  |
| 0.25  | 0.00015659      | 0.00042919  | 0.00079354  | 0.00424536  | 0.01019764         | -0.01060998 | 0.02833407  | 0.04214775  | 0.01035406        | -0.00637047 | 0.02877177  | 0.04293076  |
| 0.00  | 0.00000000      | 0.00000000  | 0.00000166  | 0.00516966  | 0.01056447         | -0.01197056 | 0.02966939  | 0.04401338  | 0.01056447        | -0.00680712 | 0.02967034  | 0.04401398  |
| -0.25 | 0.00015659      | 0.00042919  | 0.00079354  | 0.00424536  | 0.01019764         | -0.01060998 | 0.02833407  | 0.04214775  | 0.01035406        | -0.00637047 | 0.02877177  | 0.04293076  |
| -0.50 | 0.00057090      | 0.00150964  | 0.00195945  | 0.00279726  | 0.00917931         | -0.00707007 | 0.02470490  | 0.03704324  | 0.00974972        | -0.00514530 | 0.02626981  | 0.03980690  |
| -0.75 | 0.00110366      | -0.00071882 | 0.00286293  | 0.00517870  | 0.00772381         | -0.00266274 | 0.01972823  | 0.02995197  | 0.00882691        | -0.00337332 | 0.02262380  | 0.03507188  |
| -1.00 | 0.00159545      | -0.00264281 | 0.00387955  | 0.00707009  | 0.00609923         | 0.00122954  | 0.01449773  | 0.02236117  | 0.00769459        | -0.00140714 | 0.01842856  | 0.02935446  |
| -1.15 | 0.00181895      | -0.00322695 | 0.00422047  | 0.00773388  | 0.00514571         | 0.00293076  | 0.01160824  | 0.01809322  | 0.00696511        | -0.00029134 | 0.01588752  | 0.02574517  |
| -1.30 | 0.00197069      | -0.00337743 | 0.00433692  | 0.00799659  | 0.00425707         | 0.00406448  | 0.00905339  | 0.01426486  | 0.00622888        | 0.00069117  | 0.01345284  | 0.02217885  |
| -1.54 | 0.00205858      | -0.00292341 | 0.00411626  | 0.00767453  | 0.00304275         | 0.00477159  | 0.00582509  | 0.00932115  | 0.00510357        | 0.00186289  | 0.00999169  | 0.01691952  |
| -1.70 | 0.00202235      | -0.00231842 | 0.00375303  | 0.00705943  | 0.00236144         | 0.00410847  | 0.00472250  | 0.00673407  | 0.00438674        | 0.00236550  | 0.00796043  | 0.01372534  |
| -2.00 | 0.00180848      | -0.00108504 | 0.00286981  | 0.00551101  | 0.00142286         | 0.00207337  | 0.00348155  | 0.00380821  | 0.00323521        | 0.00269840  | 0.00501564  | 0.00894192  |
| -2.50 | 0.00127396      | 0.00026377  | 0.00147497  | 0.00300646  | 0.00056354         | 0.00055736  | 0.00101577  | 0.00196555  | 0.00184165        | 0.00196246  | 0.00232666  | 0.00399634  |
| -3.00 | 0.00078372      | 0.00056853  | 0.00066989  | 0.00143445  | 0.00020995         | 0.00012390  | 0.00027448  | 0.00082384  | 0.00099695        | 0.00074637  | 0.00145609  | 0.00169680  |
| -3.50 | 0.00043692      | 0.00023468  | 0.00054525  | 0.00065230  | 0.00007448         | 0.00002230  | 0.00007547  | 0.00032059  | 0.00051349        | 0.00026263  | 0.00072209  | 0.00087081  |
| -4.00 | 0.00022206      | 0.00008731  | 0.00029018  | 0.00038779  | 0.00002457         | 0.00000283  | 0.00002162  | 0.00012241  | 0.00024773        | 0.00009341  | 0.00030917  | 0.00051348  |
| -5.00 | 0.00004370      | 0.00001123  | 0.00004938  | 0.00012937  | 0.00000191         | -0.00000008 | 0.00000158  | 0.00001426  | 0.00004580        | 0.00001193  | 0.00005050  | 0.00014450  |

**T2 (continued).** The values of electron density and its Hessian's eigenvalues of  $\rho_{total}$ ,  $\rho_{\sigma}$  and  $\rho_{\pi}$  in atomic units for  $C_6H_6S$ . The highlighted cells display the position of RCPs of  $\rho_{\pi}$ .

| R(Å)  | $\rho(r)_{\pi}$ |             |             |             | $\rho(r)_{\sigma}$ |             |             |             | $\rho(r)_{total}$ |             |             |             |
|-------|-----------------|-------------|-------------|-------------|--------------------|-------------|-------------|-------------|-------------------|-------------|-------------|-------------|
|       | $\rho$          | $\lambda_1$ | $\lambda_2$ | $\lambda_3$ | $\rho$             | $\lambda_1$ | $\lambda_2$ | $\lambda_3$ | $\rho$            | $\lambda_1$ | $\lambda_2$ | $\lambda_3$ |
| 5.00  | 0.00003944      | 0.00003185  | 0.00003804  | 0.00011293  | 0.00000222         | 0.00000104  | 0.00000119  | 0.00001610  | 0.00004154        | 0.00003297  | 0.00003904  | 0.00012872  |
| 4.00  | 0.00019518      | 0.00020182  | 0.00020517  | 0.00030294  | 0.00002755         | 0.00001642  | 0.00001693  | 0.00012776  | 0.00022249        | 0.00021789  | 0.00022199  | 0.00043008  |
| 3.00  | 0.00064363      | 0.00033839  | 0.00089112  | 0.00097220  | 0.00021605         | 0.00020721  | 0.00022004  | 0.00072436  | 0.00085973        | 0.00105941  | 0.00111923  | 0.00117381  |
| 2.50  | 0.00099205      | -0.00002098 | 0.00169038  | 0.00195075  | 0.00053975         | 0.00073169  | 0.00076842  | 0.00154266  | 0.00153259        | 0.00151125  | 0.00248778  | 0.00266950  |
| 2.00  | 0.00132285      | -0.00094391 | 0.00278267  | 0.00340313  | 0.00125313         | 0.00236926  | 0.00238476  | 0.00271624  | 0.00257841        | 0.00170496  | 0.00526532  | 0.00576225  |
| 1.80  | 0.00140366      | -0.00142010 | 0.00318775  | 0.00398592  | 0.00170769         | 0.00295176  | 0.00366258  | 0.00369408  | 0.00311465        | 0.00155367  | 0.00691864  | 0.00761711  |
| 1.63  | 0.00142856      | -0.00179049 | 0.00344689  | 0.00438876  | 0.00219435         | 0.00305175  | 0.00509689  | 0.00516599  | 0.00362694        | 0.00126175  | 0.00861203  | 0.00951896  |
| 1.50  | 0.00141341      | -0.00198861 | 0.00355339  | 0.00458205  | 0.00261226         | 0.00293358  | 0.00637875  | 0.00654699  | 0.00403016        | 0.00093883  | 0.01001278  | 0.01109076  |
| 1.30  | 0.00132420      | -0.00207048 | 0.00352665  | 0.00463235  | 0.00336149         | 0.00233293  | 0.00880214  | 0.00919186  | 0.00469062        | 0.00025067  | 0.01242003  | 0.01378413  |
| 1.15  | 0.00120342      | -0.00188166 | 0.00332757  | 0.00442654  | 0.00398555         | 0.00150338  | 0.01091830  | 0.01153253  | 0.00519393        | -0.00039152 | 0.01433821  | 0.01591979  |
| 1.00  | 0.00104077      | -0.00144419 | 0.00297282  | 0.00400087  | 0.00464284         | 0.00034808  | 0.01322545  | 0.01411130  | 0.00568830        | -0.00110845 | 0.01628558  | 0.01807579  |
| 0.75  | 0.00070578      | -0.00020653 | 0.00210342  | 0.00287986  | 0.00573904         | -0.00213984 | 0.01722169  | 0.01863147  | 0.00644839        | -0.00235165 | 0.01939129  | 0.02148393  |
| 0.50  | 0.00035973      | 0.00108823  | 0.00137627  | 0.00153053  | 0.00670052         | -0.00482759 | 0.02085529  | 0.02278907  | 0.00706222        | -0.00345709 | 0.02199170  | 0.02430390  |
| 0.25  | 0.00009777      | 0.00029628  | 0.00042508  | 0.00269677  | 0.00736349         | -0.00692564 | 0.02342112  | 0.02574766  | 0.00746182        | -0.00421522 | 0.02372994  | 0.02616758  |
| 0.00  | 0.00000000      | 0.00000000  | 0.00000051  | 0.00321814  | 0.00760054         | -0.00772097 | 0.02434956  | 0.02682237  | 0.00760054        | -0.00448430 | 0.02435018  | 0.02682249  |
| -0.25 | 0.00009777      | 0.00029628  | 0.00042508  | 0.00269677  | 0.00736349         | -0.00692564 | 0.02342112  | 0.02574766  | 0.00746182        | -0.00421522 | 0.02372994  | 0.02616758  |
| -0.50 | 0.00035973      | 0.00108823  | 0.00137627  | 0.00153053  | 0.00670052         | -0.00482759 | 0.02085529  | 0.02278907  | 0.00706222        | -0.00345709 | 0.02199170  | 0.02430390  |
| -0.75 | 0.00070578      | -0.00020653 | 0.00210342  | 0.00287986  | 0.00573904         | -0.00213984 | 0.01722169  | 0.01863147  | 0.00644839        | -0.00235165 | 0.01939129  | 0.02148393  |
| -1.00 | 0.00104077      | -0.00144419 | 0.00297282  | 0.00400087  | 0.00464284         | 0.00034808  | 0.01322545  | 0.01411130  | 0.00568830        | -0.00110845 | 0.01628558  | 0.01807579  |
| -1.15 | 0.00120342      | -0.00188166 | 0.00332757  | 0.00442654  | 0.00398555         | 0.00150338  | 0.01091830  | 0.01153253  | 0.00519393        | -0.00039152 | 0.01433821  | 0.01591979  |
| -1.30 | 0.00132420      | -0.00207048 | 0.00352665  | 0.00463235  | 0.00336149         | 0.00233293  | 0.00880214  | 0.00919186  | 0.00469062        | 0.00025067  | 0.01242003  | 0.01378413  |
| -1.50 | 0.00141341      | -0.00198861 | 0.00355339  | 0.00458205  | 0.00261226         | 0.00293358  | 0.00637875  | 0.00654699  | 0.00403016        | 0.00093883  | 0.01001278  | 0.01109076  |
| -1.63 | 0.00142856      | -0.00179049 | 0.00344689  | 0.00438876  | 0.00219435         | 0.00305175  | 0.00509689  | 0.00516599  | 0.00362694        | 0.00126175  | 0.00861203  | 0.00951896  |
| -1.80 | 0.00140366      | -0.00142010 | 0.00318775  | 0.00398592  | 0.00170769         | 0.00295176  | 0.00366258  | 0.00369408  | 0.00311465        | 0.00155367  | 0.00691864  | 0.00761711  |
| -2.00 | 0.00132285      | -0.00094391 | 0.00278267  | 0.00340313  | 0.00125313         | 0.00236926  | 0.00238476  | 0.00271624  | 0.00257841        | 0.00170496  | 0.00526532  | 0.00576225  |
| -2.50 | 0.00099205      | -0.00002098 | 0.00169038  | 0.00195075  | 0.00053975         | 0.00073169  | 0.00076842  | 0.00154266  | 0.00153259        | 0.00151125  | 0.00248778  | 0.00266950  |
| -3.00 | 0.00064363      | 0.00033839  | 0.00089112  | 0.00097220  | 0.00021605         | 0.00020721  | 0.00022004  | 0.00072436  | 0.00085973        | 0.00105941  | 0.00111923  | 0.00117381  |
| -4.00 | 0.00019518      | 0.00020182  | 0.00020517  | 0.00030294  | 0.00002755         | 0.00001642  | 0.00001693  | 0.00012776  | 0.00022249        | 0.00021789  | 0.00022199  | 0.00043008  |
| -5.00 | 0.00003944      | 0.00003185  | 0.00003804  | 0.00011293  | 0.00000222         | 0.00000104  | 0.00000119  | 0.00001610  | 0.00004154        | 0.00003297  | 0.00003904  | 0.00012872  |



**T2 (continued).** The values of electron density and its Hessian's eigenvalues of  $\rho_{total}$ ,  $\rho_\sigma$  and  $\rho_\pi$  in atomic units for Pyridazine. The highlighted cells display the position of RCPs of  $\rho_\pi$ .

| R(Å)  | $\rho(r)_\pi$ |             |             |             | $\rho(r)_\sigma$ |             |             |             | $\rho(r)_{total}$ |             |             |             |
|-------|---------------|-------------|-------------|-------------|------------------|-------------|-------------|-------------|-------------------|-------------|-------------|-------------|
|       | $\rho$        | $\lambda_1$ | $\lambda_2$ | $\lambda_3$ | $\rho$           | $\lambda_1$ | $\lambda_2$ | $\lambda_3$ | $\rho$            | $\lambda_1$ | $\lambda_2$ | $\lambda_3$ |
| 5.00  | 0.00004118    | 0.00001884  | 0.00003538  | 0.00016340  | 0.00000188       | -0.00000009 | 0.00000109  | 0.00001151  | 0.00004466        | 0.00001613  | 0.00003621  | 0.00018082  |
| 4.00  | 0.00025851    | 0.00021395  | 0.00025430  | 0.00066217  | 0.00002065       | 0.00000168  | 0.00001868  | 0.00012333  | 0.00028586        | 0.00019912  | 0.00027106  | 0.00080443  |
| 3.00  | 0.00118477    | 0.00150226  | 0.00176634  | 0.00193892  | 0.00022704       | 0.00012195  | 0.00030361  | 0.00133052  | 0.00143008        | 0.00155593  | 0.00206321  | 0.00337123  |
| 2.50  | 0.00224888    | 0.00196576  | 0.00394222  | 0.00448814  | 0.00074690       | 0.00069501  | 0.00133148  | 0.00406091  | 0.00302639        | 0.00398315  | 0.00580192  | 0.00672745  |
| 2.00  | 0.00375125    | -0.00072162 | 0.00863955  | 0.00983965  | 0.00232673       | 0.00348961  | 0.00540517  | 0.00995450  | 0.00612252        | 0.00809570  | 0.01320115  | 0.01518035  |
| 1.75  | 0.00448496    | -0.00383768 | 0.01181047  | 0.01324596  | 0.00392927       | 0.00718495  | 0.01018747  | 0.01354515  | 0.00846065        | 0.00897816  | 0.01954563  | 0.02331917  |
| 1.50  | 0.00497634    | -0.00757265 | 0.01482769  | 0.01633356  | 0.00635222       | 0.01348775  | 0.01629010  | 0.01811350  | 0.01136993        | 0.00787298  | 0.02887134  | 0.03426948  |
| 1.36  | 0.00506105    | -0.00936586 | 0.01605446  | 0.01752140  | 0.00811063       | 0.01544748  | 0.01977744  | 0.02425185  | 0.01320717        | 0.00621425  | 0.03537217  | 0.04156129  |
| 1.15  | 0.00483945    | -0.01066801 | 0.01672249  | 0.01804080  | 0.01134653       | 0.01289550  | 0.03044259  | 0.03623112  | 0.01620982        | 0.00222877  | 0.04682765  | 0.05402254  |
| 1.00  | 0.00439889    | -0.00992182 | 0.01603298  | 0.01719442  | 0.01400049       | 0.00835798  | 0.04010529  | 0.04663428  | 0.01841456        | -0.00154036 | 0.05580942  | 0.06357231  |
| 0.75  | 0.00320200    | -0.00486728 | 0.01257861  | 0.01340315  | 0.01876013       | -0.00402968 | 0.05884244  | 0.06645363  | 0.02196595        | -0.00884024 | 0.07115483  | 0.07963609  |
| 0.50  | 0.00172123    | 0.00377171  | 0.00726966  | 0.00759968  | 0.02325180       | -0.01994260 | 0.07789312  | 0.08641683  | 0.02497201        | -0.01600369 | 0.08488886  | 0.09387856  |
| 0.25  | 0.00048357    | 0.00203894  | 0.00221129  | 0.01252576  | 0.02651101       | -0.03373116 | 0.09243497  | 0.10162155  | 0.02699374        | -0.02124667 | 0.09446839  | 0.10378820  |
| 0.00  | 0.00000000    | 0.00000000  | 0.00000060  | 0.01609508  | 0.02770743       | -0.03923033 | 0.09791258  | 0.10734953  | 0.02770743        | -0.02316946 | 0.09791267  | 0.10734953  |
| -0.25 | 0.00048357    | 0.00203894  | 0.00221129  | 0.01252576  | 0.02651101       | -0.03373116 | 0.09243497  | 0.10162155  | 0.02699374        | -0.02124667 | 0.09446839  | 0.10378820  |
| -0.50 | 0.00172123    | 0.00377171  | 0.00726966  | 0.00759968  | 0.02325180       | -0.01994260 | 0.07789312  | 0.08641683  | 0.02497201        | -0.01600369 | 0.08488886  | 0.09387856  |
| -0.75 | 0.00320200    | -0.00486728 | 0.01257861  | 0.01340315  | 0.01876013       | -0.00402968 | 0.05884244  | 0.06645363  | 0.02196595        | -0.00884024 | 0.07115483  | 0.07963609  |
| -1.00 | 0.00439889    | -0.00992182 | 0.01603298  | 0.01719442  | 0.01400049       | 0.00835798  | 0.04010529  | 0.04663428  | 0.01841456        | -0.00154036 | 0.05580942  | 0.06357231  |
| -1.15 | 0.00483945    | -0.01066801 | 0.01672249  | 0.01804080  | 0.01134653       | 0.01289550  | 0.03044259  | 0.03623112  | 0.01620982        | 0.00222877  | 0.04682765  | 0.05402254  |
| -1.36 | 0.00506105    | -0.00936586 | 0.01605446  | 0.01752140  | 0.00811063       | 0.01544748  | 0.01977744  | 0.02425185  | 0.01320717        | 0.00621425  | 0.03537217  | 0.04156129  |
| -1.50 | 0.00497634    | -0.00757265 | 0.01482769  | 0.01633356  | 0.00635222       | 0.01348775  | 0.01629010  | 0.01811350  | 0.01136993        | 0.00787298  | 0.02887134  | 0.03426948  |
| -1.75 | 0.00448496    | -0.00383768 | 0.01181047  | 0.01324596  | 0.00392927       | 0.00718495  | 0.01018747  | 0.01354515  | 0.00846065        | 0.00897816  | 0.01954563  | 0.02331917  |
| -2.00 | 0.00375125    | -0.00072162 | 0.00863955  | 0.00983965  | 0.00232673       | 0.00348961  | 0.00540517  | 0.00995450  | 0.00612252        | 0.00809570  | 0.01320115  | 0.01518035  |
| -2.50 | 0.00224888    | 0.00196576  | 0.00394222  | 0.00448814  | 0.00074690       | 0.00069501  | 0.00133148  | 0.00406091  | 0.00302639        | 0.00398315  | 0.00580192  | 0.00672745  |
| -3.00 | 0.00118477    | 0.00150226  | 0.00176634  | 0.00193892  | 0.00022704       | 0.00012195  | 0.00030361  | 0.00133052  | 0.00143008        | 0.00155593  | 0.00206321  | 0.00337123  |
| -4.00 | 0.00025851    | 0.00021395  | 0.00025430  | 0.00066217  | 0.00002065       | 0.00000168  | 0.00001868  | 0.00012333  | 0.00028586        | 0.00019912  | 0.00027106  | 0.00080443  |
| -5.00 | 0.00004118    | 0.00001884  | 0.00003538  | 0.00016340  | 0.00000188       | -0.00000009 | 0.00000109  | 0.00001151  | 0.00004466        | 0.00001613  | 0.00003621  | 0.00018082  |

**T2 (continued).** The values of electron density and its Hessian's eigenvalues of  $\rho_{total}$ ,  $\rho_{\sigma}$  and  $\rho_{\pi}$  in atomic units for Pyrimidine. The highlighted cells display the position of RCPs of  $\rho_{\pi}$ .

| R(Å)  | $\rho(r)_{\pi}$ |             |             |             | $\rho(r)_{\sigma}$ |             |             |             | $\rho(r)_{total}$ |             |             |             |
|-------|-----------------|-------------|-------------|-------------|--------------------|-------------|-------------|-------------|-------------------|-------------|-------------|-------------|
|       | $\rho$          | $\lambda_1$ | $\lambda_2$ | $\lambda_3$ | $\rho$             | $\lambda_1$ | $\lambda_2$ | $\lambda_3$ | $\rho$            | $\lambda_1$ | $\lambda_2$ | $\lambda_3$ |
| 5.00  | 0.00003874      | 0.00002451  | 0.00003405  | 0.00015536  | 0.00000117         | 0.00000038  | 0.00000068  | 0.00001073  | 0.00004084        | 0.00002498  | 0.00003211  | 0.00017032  |
| 4.00  | 0.00025046      | 0.00021501  | 0.00025790  | 0.00066558  | 0.00001937         | 0.00000363  | 0.00001415  | 0.00013282  | 0.00027379        | 0.00021650  | 0.00026132  | 0.00081193  |
| 3.50  | 0.00056551      | 0.00059652  | 0.00067062  | 0.00121719  | 0.00007041         | 0.00002126  | 0.00005753  | 0.00043059  | 0.00064275        | 0.00061346  | 0.00070563  | 0.00167640  |
| 3.00  | 0.00118438      | 0.00159784  | 0.00170707  | 0.00202775  | 0.00024100         | 0.00013515  | 0.00025562  | 0.00138907  | 0.00143673        | 0.00172752  | 0.00193164  | 0.00346197  |
| 2.50  | 0.00228002      | 0.00212796  | 0.00405457  | 0.00450417  | 0.00079343         | 0.00079015  | 0.00119279  | 0.00419555  | 0.00309197        | 0.00483695  | 0.00510762  | 0.00692458  |
| 2.00  | 0.00384712      | -0.00068493 | 0.00904241  | 0.00981297  | 0.00245719         | 0.00391304  | 0.00505589  | 0.01030820  | 0.00633053        | 0.00919951  | 0.01291464  | 0.01526039  |
| 1.75  | 0.00461881      | -0.00394854 | 0.01236948  | 0.01319827  | 0.00414174         | 0.00798602  | 0.00965123  | 0.01408885  | 0.00878804        | 0.00981163  | 0.02027133  | 0.02311380  |
| 1.50  | 0.00514056      | -0.00785793 | 0.01552610  | 0.01626548  | 0.00669012         | 0.01520530  | 0.01609055  | 0.01795846  | 0.01185595        | 0.00853940  | 0.03058986  | 0.03383120  |
| 1.36  | 0.00523479      | -0.00978625 | 0.01684562  | 0.01747158  | 0.00860466         | 0.01649916  | 0.02124949  | 0.02386356  | 0.01386178        | 0.00671755  | 0.03792207  | 0.04124192  |
| 1.15  | 0.00501269      | -0.01111041 | 0.01753261  | 0.01795531  | 0.01195177         | 0.01371624  | 0.03281621  | 0.03539497  | 0.01698103        | 0.00259516  | 0.05014580  | 0.05328215  |
| 1.00  | 0.00455972      | -0.01034659 | 0.01683085  | 0.01711097  | 0.01475214         | 0.00895640  | 0.04331236  | 0.04564258  | 0.01932381        | -0.00139025 | 0.05993735  | 0.06268928  |
| 0.75  | 0.00332190      | -0.00509689 | 0.01322856  | 0.01334180  | 0.01978046         | -0.00411594 | 0.06372857  | 0.06518688  | 0.02310762        | -0.00919519 | 0.07678755  | 0.07847473  |
| 0.50  | 0.00178663      | 0.00397105  | 0.00752619  | 0.00761553  | 0.02453173         | -0.02100593 | 0.08462276  | 0.08487439  | 0.02631972        | -0.01696533 | 0.09205097  | 0.09240608  |
| 0.25  | 0.00050209      | 0.00218519  | 0.00218640  | 0.01297847  | 0.02798244         | -0.03569282 | 0.09986531  | 0.10066467  | 0.02848465        | -0.02272047 | 0.10205414  | 0.10282195  |
| 0.00  | 0.00000000      | 0.00000000  | 0.00000002  | 0.01671317  | 0.02924975         | -0.04156004 | 0.10551174  | 0.10672713  | 0.02924975        | -0.02484592 | 0.10551174  | 0.10672716  |
| -0.25 | 0.00050209      | 0.00218519  | 0.00218640  | 0.01297847  | 0.02798244         | -0.03569282 | 0.09986531  | 0.10066467  | 0.02848465        | -0.02272047 | 0.10205414  | 0.10282195  |
| -0.50 | 0.00178663      | 0.00397105  | 0.00752619  | 0.00761553  | 0.02453173         | -0.02100593 | 0.08462276  | 0.08487439  | 0.02631972        | -0.01696533 | 0.09205097  | 0.09240608  |
| -0.75 | 0.00332190      | -0.00509689 | 0.01322856  | 0.01334180  | 0.01978046         | -0.00411594 | 0.06372857  | 0.06518688  | 0.02310762        | -0.00919519 | 0.07678755  | 0.07847473  |
| -1.00 | 0.00455972      | -0.01034659 | 0.01683085  | 0.01711097  | 0.01475214         | 0.00895640  | 0.04331236  | 0.04564258  | 0.01932381        | -0.00139025 | 0.05993735  | 0.06268928  |
| -1.15 | 0.00501269      | -0.01111041 | 0.01753261  | 0.01795531  | 0.01195177         | 0.01371624  | 0.03281621  | 0.03539497  | 0.01698103        | 0.00259516  | 0.05014580  | 0.05328215  |
| -1.36 | 0.00523479      | -0.00978625 | 0.01684562  | 0.01747158  | 0.00860466         | 0.01649916  | 0.02124949  | 0.02386356  | 0.01386178        | 0.00671755  | 0.03792207  | 0.04124192  |
| -1.50 | 0.00514056      | -0.00785793 | 0.01552610  | 0.01626548  | 0.00669012         | 0.01520530  | 0.01609055  | 0.01795846  | 0.01185595        | 0.00853940  | 0.03058986  | 0.03383120  |
| -1.75 | 0.00461881      | -0.00394854 | 0.01236948  | 0.01319827  | 0.00414174         | 0.00798602  | 0.00965123  | 0.01408885  | 0.00878804        | 0.00981163  | 0.02027133  | 0.02311380  |
| -2.00 | 0.00384712      | -0.00068493 | 0.00904241  | 0.00981297  | 0.00245719         | 0.00391304  | 0.00505589  | 0.01030820  | 0.00633053        | 0.00919951  | 0.01291464  | 0.01526039  |
| -2.50 | 0.00228002      | 0.00212796  | 0.00405457  | 0.00450417  | 0.00079343         | 0.00079015  | 0.00119279  | 0.00419555  | 0.00309197        | 0.00483695  | 0.00510762  | 0.00692458  |
| -3.00 | 0.00118438      | 0.00159784  | 0.00170707  | 0.00202775  | 0.00024100         | 0.00013515  | 0.00025562  | 0.00138907  | 0.00143673        | 0.00172752  | 0.00193164  | 0.00346197  |
| -3.50 | 0.00056551      | 0.00059652  | 0.00067062  | 0.00121719  | 0.00007041         | 0.00002126  | 0.00005753  | 0.00043059  | 0.00064275        | 0.00061346  | 0.00070563  | 0.00167640  |
| -4.00 | 0.00025046      | 0.00021501  | 0.00025790  | 0.00066558  | 0.00001937         | 0.00000363  | 0.00001415  | 0.00013282  | 0.00027379        | 0.00021650  | 0.00026132  | 0.00081193  |
| -5.00 | 0.00003874      | 0.00002451  | 0.00003405  | 0.00015536  | 0.00000117         | 0.00000038  | 0.00000068  | 0.00001073  | 0.00004084        | 0.00002498  | 0.00003211  | 0.00017032  |

**T2 (continued).** The values of electron density and its Hessian's eigenvalues of  $\rho_{total}$ ,  $\rho_{\sigma}$  and  $\rho_{\pi}$  in atomic units for Pyrazine. The highlighted cells display the position of RCPs of  $\rho_{\pi}$ .

| R(Å)  | $\rho(r)_{\pi}$ |             |             |             | $\rho(r)_{\sigma}$ |             |             |             | $\rho(r)_{total}$ |             |             |             |
|-------|-----------------|-------------|-------------|-------------|--------------------|-------------|-------------|-------------|-------------------|-------------|-------------|-------------|
|       | $\rho$          | $\lambda_1$ | $\lambda_2$ | $\lambda_3$ | $\rho$             | $\lambda_1$ | $\lambda_2$ | $\lambda_3$ | $\rho$            | $\lambda_1$ | $\lambda_2$ | $\lambda_3$ |
| 5.00  | 0.00003623      | 0.00002181  | 0.00004956  | 0.00014046  | 0.00000202         | -0.00000011 | 0.00000224  | 0.00001128  | 0.00003825        | 0.00002170  | 0.00005180  | 0.00015174  |
| 4.00  | 0.00023852      | 0.00020838  | 0.00030120  | 0.00063361  | 0.00002183         | -0.00000423 | 0.00002645  | 0.00012453  | 0.00026035        | 0.00020415  | 0.00032765  | 0.00075814  |
| 3.00  | 0.00114655      | 0.00154274  | 0.00189602  | 0.00191163  | 0.00023623         | 0.00007009  | 0.00036897  | 0.00133661  | 0.00138278        | 0.00161300  | 0.00226493  | 0.00324814  |
| 2.50  | 0.00221804      | 0.00209419  | 0.00386820  | 0.00475909  | 0.00077203         | 0.00056850  | 0.00156449  | 0.00410700  | 0.00299007        | 0.00443730  | 0.00620115  | 0.00632303  |
| 2.00  | 0.00375175      | -0.00067784 | 0.00863698  | 0.01028937  | 0.00240691         | 0.00324760  | 0.00608379  | 0.01016399  | 0.00615866        | 0.00948613  | 0.01188636  | 0.01637147  |
| 1.75  | 0.00450641      | -0.00386532 | 0.01187529  | 0.01371171  | 0.00407322         | 0.00696049  | 0.01118199  | 0.01388807  | 0.00857962        | 0.01002275  | 0.01883852  | 0.02489108  |
| 1.50  | 0.00501598      | -0.00767293 | 0.01500132  | 0.01671729  | 0.00660169         | 0.01377916  | 0.01644476  | 0.01937689  | 0.01161765        | 0.00877185  | 0.02878446  | 0.03609036  |
| 1.36  | 0.00510764      | -0.00954414 | 0.01633439  | 0.01784387  | 0.00849965         | 0.01652917  | 0.01959640  | 0.02578751  | 0.01360728        | 0.00698506  | 0.03593552  | 0.04362682  |
| 1.15  | 0.00489010      | -0.01083041 | 0.01708698  | 0.01818775  | 0.01183403         | 0.01372112  | 0.03094418  | 0.03749652  | 0.01672411        | 0.00289074  | 0.04803693  | 0.05567869  |
| 1.00  | 0.00444748      | -0.01008066 | 0.01645353  | 0.01724103  | 0.01462186         | 0.00898101  | 0.04134596  | 0.04768867  | 0.01906932        | -0.00109961 | 0.05780584  | 0.06492352  |
| 0.75  | 0.00323921      | -0.00495508 | 0.01298428  | 0.01334524  | 0.01963045         | -0.00404567 | 0.06175530  | 0.06687624  | 0.02286966        | -0.00900068 | 0.07474616  | 0.08021501  |
| 0.50  | 0.00174172      | 0.00393186  | 0.00740910  | 0.00752913  | 0.02436526         | -0.02090021 | 0.08277396  | 0.08602515  | 0.02610698        | -0.01696773 | 0.09018798  | 0.09354884  |
| 0.25  | 0.00048939      | 0.00215886  | 0.00218248  | 0.01264108  | 0.02780496         | -0.03557075 | 0.09895883  | 0.10054220  | 0.02829435        | -0.02293000 | 0.10112004  | 0.10272269  |
| 0.00  | 0.00000000      | 0.00000000  | 0.00000000  | 0.01628957  | 0.02906840         | -0.04143429 | 0.10508185  | 0.10600132  | 0.02906840        | -0.02514490 | 0.10508194  | 0.10600135  |
| -0.25 | 0.00048939      | 0.00215886  | 0.00218248  | 0.01264108  | 0.02780496         | -0.03557075 | 0.09895883  | 0.10054220  | 0.02829435        | -0.02293000 | 0.10112004  | 0.10272269  |
| -0.50 | 0.00174172      | 0.00393186  | 0.00740910  | 0.00752913  | 0.02436526         | -0.02090021 | 0.08277396  | 0.08602515  | 0.02610698        | -0.01696773 | 0.09018798  | 0.09354884  |
| -0.75 | 0.00323921      | -0.00495508 | 0.01298428  | 0.01334524  | 0.01963045         | -0.00404567 | 0.06175530  | 0.06687624  | 0.02286966        | -0.00900068 | 0.07474616  | 0.08021501  |
| -1.00 | 0.00444748      | -0.01008066 | 0.01645353  | 0.01724103  | 0.01462186         | 0.00898101  | 0.04134596  | 0.04768867  | 0.01906932        | -0.00109961 | 0.05780584  | 0.06492352  |
| -1.15 | 0.00489010      | -0.01083041 | 0.01708698  | 0.01818775  | 0.01183403         | 0.01372112  | 0.03094418  | 0.03749652  | 0.01672411        | 0.00289074  | 0.04803693  | 0.05567869  |
| -1.36 | 0.00510764      | -0.00954414 | 0.01633439  | 0.01784387  | 0.00849965         | 0.01652917  | 0.01959640  | 0.02578751  | 0.01360728        | 0.00698506  | 0.03593552  | 0.04362682  |
| -1.50 | 0.00501598      | -0.00767293 | 0.01500132  | 0.01671729  | 0.00660169         | 0.01377916  | 0.01644476  | 0.01937689  | 0.01161765        | 0.00877185  | 0.02878446  | 0.03609036  |
| -1.75 | 0.00450641      | -0.00386532 | 0.01187529  | 0.01371171  | 0.00407322         | 0.00696049  | 0.01118199  | 0.01388807  | 0.00857962        | 0.01002275  | 0.01883852  | 0.02489108  |
| -2.00 | 0.00375175      | -0.00067784 | 0.00863698  | 0.01028937  | 0.00240691         | 0.00324760  | 0.00608379  | 0.01016399  | 0.00615866        | 0.00948613  | 0.01188636  | 0.01637147  |
| -2.50 | 0.00221804      | 0.00209419  | 0.00386820  | 0.00475909  | 0.00077203         | 0.00056850  | 0.00156449  | 0.00410700  | 0.00299007        | 0.00443730  | 0.00620115  | 0.00632303  |
| -3.00 | 0.00114655      | 0.00154274  | 0.00189602  | 0.00191163  | 0.00023623         | 0.00007009  | 0.00036897  | 0.00133661  | 0.00138278        | 0.00161300  | 0.00226493  | 0.00324814  |
| -4.00 | 0.00023852      | 0.00020838  | 0.00030120  | 0.00063361  | 0.00002183         | -0.00000423 | 0.00002645  | 0.00012453  | 0.00026035        | 0.00020415  | 0.00032765  | 0.00075814  |
| -5.00 | 0.00003623      | 0.00002181  | 0.00004956  | 0.00014046  | 0.00000202         | -0.00000011 | 0.00000224  | 0.00001128  | 0.00003825        | 0.00002170  | 0.00005180  | 0.00015174  |

**T2 (continued).** The values of electron density and its Hessian's eigenvalues of  $\rho_{total}$ ,  $\rho_{\sigma}$  and  $\rho_{\pi}$  in atomic units for 1,3,5-Triazine. The highlighted cells display the position of RCPs of  $\rho_{\pi}$ .

| R(Å)  | $\rho(r)_{\pi}$ |             |             |             | $\rho(r)_{\sigma}$ |             |             |             | $\rho(r)_{total}$ |             |             |             |
|-------|-----------------|-------------|-------------|-------------|--------------------|-------------|-------------|-------------|-------------------|-------------|-------------|-------------|
|       | $\rho$          | $\lambda_1$ | $\lambda_2$ | $\lambda_3$ | $\rho$             | $\lambda_1$ | $\lambda_2$ | $\lambda_3$ | $\rho$            | $\lambda_1$ | $\lambda_2$ | $\lambda_3$ |
| 5.00  | 0.00002890      | 0.00002485  | 0.00002488  | 0.00012601  | 0.00000038         | 0.00000084  | 0.00000084  | 0.00000660  | 0.00002928        | 0.00002570  | 0.00002572  | 0.00013262  |
| 4.00  | 0.00021308      | 0.00021190  | 0.00021271  | 0.00064272  | 0.00001502         | 0.00000446  | 0.00000447  | 0.00013092  | 0.00022810        | 0.00021637  | 0.00021717  | 0.00077365  |
| 3.00  | 0.00112159      | 0.00160363  | 0.00161539  | 0.00206738  | 0.00023644         | 0.00012136  | 0.00012144  | 0.00141767  | 0.00135802        | 0.00172506  | 0.00173675  | 0.00348505  |
| 2.50  | 0.00224186      | 0.00242729  | 0.00417257  | 0.00420694  | 0.00080193         | 0.00076964  | 0.00076990  | 0.00431318  | 0.00304379        | 0.004942451 | 0.004976596 | 0.00674046  |
| 2.00  | 0.00390549      | -0.00031021 | 0.00952878  | 0.00960857  | 0.00252694         | 0.00403522  | 0.00403603  | 0.01094068  | 0.00643243        | 0.01063047  | 0.01356474  | 0.01364386  |
| 1.75  | 0.00475928      | -0.00376466 | 0.01317350  | 0.01328137  | 0.00430103         | 0.00839449  | 0.00839587  | 0.01528091  | 0.00906031        | 0.01151625  | 0.02156924  | 0.02167599  |
| 1.55  | 0.00528186      | -0.00724273 | 0.01605974  | 0.01618667  | 0.00639285         | 0.01431163  | 0.01431369  | 0.01811478  | 0.01167471        | 0.01087206  | 0.03037323  | 0.03049850  |
| 1.33  | 0.00551777      | -0.01074818 | 0.01845560  | 0.01859226  | 0.00953864         | 0.01889025  | 0.02432210  | 0.02432523  | 0.01505641        | 0.00814208  | 0.04278054  | 0.04291465  |
| 1.25  | 0.00548309      | -0.01160407 | 0.01893365  | 0.01906926  | 0.01089088         | 0.01817518  | 0.02895270  | 0.02895631  | 0.01637397        | 0.00657111  | 0.04788963  | 0.04802229  |
| 1.15  | 0.00533516      | -0.01216543 | 0.01914359  | 0.01927365  | 0.01275988         | 0.01629838  | 0.03562965  | 0.03563392  | 0.01809504        | 0.00413295  | 0.05477713  | 0.05490369  |
| 1.00  | 0.00488657      | -0.01158377 | 0.01849503  | 0.01860738  | 0.01585787         | 0.01117592  | 0.04732713  | 0.04733255  | 0.02074444        | -0.00040785 | 0.06582710  | 0.06593498  |
| 0.75  | 0.00359533      | -0.00609415 | 0.01468765  | 0.01474872  | 0.02148185         | -0.00357862 | 0.07029657  | 0.07030423  | 0.02507718        | -0.00967277 | 0.08499120  | 0.08504597  |
| 0.50  | 0.00194814      | 0.00397652  | 0.00843361  | 0.00843575  | 0.02685538         | -0.02323265 | 0.09405158  | 0.09406154  | 0.02880352        | -0.01925613 | 0.10248712  | 0.10249535  |
| 0.25  | 0.00055003      | 0.00244132  | 0.00246942  | 0.01406909  | 0.03078840         | -0.04061052 | 0.11243683  | 0.11244858  | 0.03133843        | -0.02654143 | 0.11487877  | 0.11491738  |
| 0.00  | 0.00000000      | 0.00000000  | 0.00000058  | 0.01833778  | 0.03223861         | -0.04760595 | 0.11941527  | 0.11942771  | 0.03223861        | -0.02926816 | 0.11941580  | 0.11942775  |
| -0.25 | 0.00055003      | 0.00244132  | 0.00246942  | 0.01406909  | 0.03078840         | -0.04061052 | 0.11243683  | 0.11244858  | 0.03133843        | -0.02654143 | 0.11487877  | 0.11491738  |
| -0.50 | 0.00194814      | 0.00397652  | 0.00843361  | 0.00843575  | 0.02685538         | -0.02323265 | 0.09405158  | 0.09406154  | 0.02880352        | -0.01925613 | 0.10248712  | 0.10249535  |
| -0.75 | 0.00359533      | -0.00609415 | 0.01468765  | 0.01474872  | 0.02148185         | -0.00357862 | 0.07029657  | 0.07030423  | 0.02507718        | -0.00967277 | 0.08499120  | 0.08504597  |
| -1.00 | 0.00488657      | -0.01158377 | 0.01849503  | 0.01860738  | 0.01585787         | 0.01117592  | 0.04732713  | 0.04733255  | 0.02074444        | -0.00040785 | 0.06582710  | 0.06593498  |
| -1.15 | 0.00533516      | -0.01216543 | 0.01914359  | 0.01927365  | 0.01275988         | 0.01629838  | 0.03562965  | 0.03563392  | 0.01809504        | 0.00413295  | 0.05477713  | 0.05490369  |
| -1.25 | 0.00548309      | -0.01160407 | 0.01893365  | 0.01906926  | 0.01089088         | 0.01817518  | 0.02895270  | 0.02895631  | 0.01637397        | 0.00657111  | 0.04788963  | 0.04802229  |
| -1.33 | 0.00551777      | -0.01074818 | 0.01845560  | 0.01859226  | 0.00953864         | 0.01889025  | 0.02432210  | 0.02432523  | 0.01505641        | 0.00814208  | 0.04278054  | 0.04291465  |
| -1.55 | 0.00528186      | -0.00724273 | 0.01605974  | 0.01618667  | 0.00639285         | 0.01431163  | 0.01431369  | 0.01811478  | 0.01167471        | 0.01087206  | 0.03037323  | 0.03049850  |
| -1.75 | 0.00475928      | -0.00376466 | 0.01317350  | 0.01328137  | 0.00430103         | 0.00839449  | 0.00839587  | 0.01528091  | 0.00906031        | 0.01151625  | 0.02156924  | 0.02167599  |
| -2.00 | 0.00390549      | -0.00031021 | 0.00952878  | 0.00960857  | 0.00252694         | 0.00403522  | 0.00403603  | 0.01094068  | 0.00643243        | 0.01063047  | 0.01356474  | 0.01364386  |
| -2.50 | 0.00224186      | 0.00242729  | 0.00417257  | 0.00420694  | 0.00080193         | 0.00076964  | 0.00076990  | 0.00431318  | 0.00304379        | 0.004942451 | 0.004976596 | 0.00674046  |
| -3.00 | 0.00112159      | 0.00160363  | 0.00161539  | 0.00206738  | 0.00023644         | 0.00012136  | 0.00012144  | 0.00141767  | 0.00135802        | 0.00172506  | 0.00173675  | 0.00348505  |
| -4.00 | 0.00021308      | 0.00021190  | 0.00021271  | 0.00064272  | 0.00001502         | 0.00000446  | 0.00000447  | 0.00013092  | 0.00022810        | 0.00021637  | 0.00021717  | 0.00077365  |
| -5.00 | 0.00002890      | 0.00002485  | 0.00002488  | 0.00012601  | 0.00000038         | 0.00000084  | 0.00000084  | 0.00000660  | 0.00002928        | 0.00002570  | 0.00002572  | 0.00013262  |

**T2 (continued).** The values of electron density and its Hessian's eigenvalues of  $\rho_{total}$ ,  $\rho_\sigma$  and  $\rho_\pi$  in atomic units for 1,2,4-Triazine. The highlighted cells display the position of RCPs of  $\rho_\pi$ .

| R(Å)  | $\rho(r)_\pi$ |             |             |             | $\rho(r)_\sigma$ |             |             |             | $\rho(r)_{total}$ |             |             |             |
|-------|---------------|-------------|-------------|-------------|------------------|-------------|-------------|-------------|-------------------|-------------|-------------|-------------|
|       | $\rho$        | $\lambda_1$ | $\lambda_2$ | $\lambda_3$ | $\rho$           | $\lambda_1$ | $\lambda_2$ | $\lambda_3$ | $\rho$            | $\lambda_1$ | $\lambda_2$ | $\lambda_3$ |
| 5.00  | 0.00002895    | 0.00001732  | 0.00003202  | 0.00012848  | 0.00000127       | 0.00000031  | 0.00000075  | 0.00000867  | 0.00003057        | 0.00001741  | 0.00003204  | 0.00013871  |
| 4.00  | 0.00021101    | 0.00019226  | 0.00024241  | 0.00063819  | 0.00001680       | -0.00000260 | 0.00001717  | 0.00011748  | 0.00022927        | 0.00018883  | 0.00025560  | 0.00076031  |
| 3.00  | 0.00110127    | 0.00146716  | 0.00172112  | 0.00200434  | 0.00021758       | 0.00003969  | 0.00028300  | 0.00131917  | 0.00132296        | 0.00150343  | 0.00198857  | 0.00334907  |
| 2.50  | 0.00218218    | 0.00221842  | 0.00376180  | 0.00455567  | 0.00073751       | 0.00043114  | 0.00129556  | 0.00410590  | 0.00292691        | 0.00409368  | 0.00554248  | 0.00673842  |
| 2.00  | 0.00376140    | -0.00041497 | 0.00861250  | 0.01023131  | 0.00235077       | 0.00287434  | 0.00547074  | 0.01048876  | 0.00612296        | 0.00949020  | 0.01187322  | 0.01586061  |
| 1.75  | 0.00456124    | -0.00366664 | 0.01204605  | 0.01394228  | 0.00402122       | 0.00649100  | 0.01047112  | 0.01466238  | 0.00859371        | 0.01066439  | 0.01868798  | 0.02451004  |
| 1.50  | 0.00512764    | -0.00773462 | 0.01547522  | 0.01740091  | 0.00659207       | 0.01335571  | 0.01747749  | 0.01926762  | 0.01172957        | 0.00981408  | 0.02892993  | 0.03636743  |
| 1.34  | 0.00525369    | -0.01009522 | 0.01717512  | 0.01897775  | 0.00886422       | 0.01781540  | 0.02057619  | 0.02706239  | 0.01412588        | 0.00780080  | 0.03764807  | 0.04590957  |
| 1.15  | 0.00506902    | -0.01146274 | 0.01797805  | 0.01954236  | 0.01201026       | 0.01540588  | 0.03136765  | 0.03874314  | 0.01708452        | 0.00394760  | 0.04930447  | 0.05815968  |
| 1.00  | 0.00463612    | -0.01087774 | 0.01742498  | 0.01875472  | 0.01493774       | 0.01054549  | 0.04241404  | 0.05020613  | 0.01957688        | -0.00032309 | 0.05979640  | 0.06883852  |
| 0.75  | 0.00340475    | -0.00566646 | 0.01386507  | 0.01477686  | 0.02025166       | -0.00342391 | 0.06431129  | 0.07229692  | 0.02365665        | -0.00907210 | 0.07813508  | 0.08697680  |
| 0.50  | 0.00184255    | 0.00379404  | 0.00797237  | 0.00845808  | 0.02532786       | -0.02198323 | 0.08703204  | 0.09483274  | 0.02716969        | -0.01814579 | 0.09495427  | 0.10322723  |
| 0.25  | 0.00051983    | 0.00231124  | 0.00246609  | 0.01332634  | 0.02904245       | -0.03836553 | 0.10458863  | 0.11217219  | 0.02956193        | -0.02505411 | 0.10689762  | 0.11462601  |
| 0.00  | 0.00000000    | 0.00000000  | 0.00000013  | 0.01732691  | 0.03041195       | -0.04495475 | 0.11123809  | 0.11874243  | 0.03041195        | -0.02764136 | 0.11123823  | 0.11874243  |
| -0.25 | 0.00051983    | 0.00231124  | 0.00246609  | 0.01332634  | 0.02904245       | -0.03836553 | 0.10458863  | 0.11217219  | 0.02956193        | -0.02505411 | 0.10689762  | 0.11462601  |
| -0.50 | 0.00184255    | 0.00379404  | 0.00797237  | 0.00845808  | 0.02532786       | -0.02198323 | 0.08703204  | 0.09483274  | 0.02716969        | -0.01814579 | 0.09495427  | 0.10322723  |
| -0.75 | 0.00340475    | -0.00566646 | 0.01386507  | 0.01477686  | 0.02025166       | -0.00342391 | 0.06431129  | 0.07229692  | 0.02365665        | -0.00907210 | 0.07813508  | 0.08697680  |
| -1.00 | 0.00463612    | -0.01087774 | 0.01742498  | 0.01875472  | 0.01493774       | 0.01054549  | 0.04241404  | 0.05020613  | 0.01957688        | -0.00032309 | 0.05979640  | 0.06883852  |
| -1.15 | 0.00506902    | -0.01146274 | 0.01797805  | 0.01954236  | 0.01201026       | 0.01540588  | 0.03136765  | 0.03874314  | 0.01708452        | 0.00394760  | 0.04930447  | 0.05815968  |
| -1.34 | 0.00525369    | -0.01009522 | 0.01717512  | 0.01897775  | 0.00886422       | 0.01781540  | 0.02057619  | 0.02706239  | 0.01412588        | 0.00780080  | 0.03764807  | 0.04590957  |
| -1.50 | 0.00512764    | -0.00773462 | 0.01547522  | 0.01740091  | 0.00659207       | 0.01335571  | 0.01747749  | 0.01926762  | 0.01172957        | 0.00981408  | 0.02892993  | 0.03636743  |
| -1.75 | 0.00456124    | -0.00366664 | 0.01204605  | 0.01394228  | 0.00402122       | 0.00649100  | 0.01047112  | 0.01466238  | 0.00859371        | 0.01066439  | 0.01868798  | 0.02451004  |
| -2.00 | 0.00376140    | -0.00041497 | 0.00861250  | 0.01023131  | 0.00235077       | 0.00287434  | 0.00547074  | 0.01048876  | 0.00612296        | 0.00949020  | 0.01187322  | 0.01586061  |
| -2.50 | 0.00218218    | 0.00221842  | 0.00376180  | 0.00455567  | 0.00073751       | 0.00043114  | 0.00129556  | 0.00410590  | 0.00292691        | 0.00409368  | 0.00554248  | 0.00673842  |
| -3.00 | 0.00110127    | 0.00146716  | 0.00172112  | 0.00200434  | 0.00021758       | 0.00003969  | 0.00028300  | 0.00131917  | 0.00132296        | 0.00150343  | 0.00198857  | 0.00334907  |
| -4.00 | 0.00021101    | 0.00019226  | 0.00024241  | 0.00063819  | 0.00001680       | -0.00000260 | 0.00001717  | 0.00011748  | 0.00022927        | 0.00018883  | 0.00025560  | 0.00076031  |
| -5.00 | 0.00002895    | 0.00001732  | 0.00003202  | 0.00012848  | 0.00000127       | 0.00000031  | 0.00000075  | 0.00000867  | 0.00003057        | 0.00001741  | 0.00003204  | 0.00013871  |

**T2 (continued).** The values of electron density and its Hessian's eigenvalues of  $\rho_{total}$ ,  $\rho_{\sigma}$  and  $\rho_{\pi}$  in atomic units for 1,2,3-Triazine. The highlighted cells display the position of RCPs of  $\rho_{\pi}$ .

| R(Å)  | $\rho(r)_{\pi}$ |             |             |             | $\rho(r)_{\sigma}$ |             |             |             | $\rho(r)_{total}$ |             |             |             |
|-------|-----------------|-------------|-------------|-------------|--------------------|-------------|-------------|-------------|-------------------|-------------|-------------|-------------|
|       | $\rho$          | $\lambda_1$ | $\lambda_2$ | $\lambda_3$ | $\rho$             | $\lambda_1$ | $\lambda_2$ | $\lambda_3$ | $\rho$            | $\lambda_1$ | $\lambda_2$ | $\lambda_3$ |
| 5.00  | 0.00003266      | 0.00001703  | 0.00002282  | 0.00014601  | 0.00000151         | -0.00000014 | 0.00000067  | 0.00000978  | 0.00003580        | 0.00001395  | 0.00002320  | 0.00016229  |
| 4.00  | 0.00022594      | 0.00020697  | 0.00020799  | 0.00066177  | 0.00001754         | 0.00000406  | 0.00000733  | 0.00011857  | 0.00025059        | 0.00019330  | 0.00021308  | 0.00080131  |
| 3.50  | 0.00052703      | 0.00057492  | 0.00058282  | 0.00121696  | 0.00006181         | 0.00002468  | 0.00003302  | 0.00039519  | 0.00060103        | 0.00056021  | 0.00061255  | 0.00166364  |
| 3.00  | 0.00112882      | 0.00145326  | 0.00158360  | 0.00201946  | 0.00021342         | 0.00012761  | 0.00016942  | 0.00130480  | 0.00136321        | 0.00149171  | 0.00175245  | 0.00345492  |
| 2.50  | 0.00219676      | 0.00205514  | 0.00403526  | 0.00410667  | 0.00071595         | 0.00069804  | 0.00090290  | 0.00404272  | 0.00295016        | 0.00380969  | 0.00501087  | 0.00706447  |
| 2.00  | 0.00373533      | -0.00044797 | 0.00902036  | 0.00939146  | 0.00226535         | 0.00357199  | 0.00433726  | 0.01028154  | 0.00605733        | 0.00817073  | 0.01368530  | 0.01412680  |
| 1.75  | 0.00450993      | -0.00360402 | 0.01249508  | 0.01300956  | 0.00386473         | 0.00744727  | 0.00880909  | 0.01434352  | 0.00843403        | 0.00960916  | 0.02078692  | 0.02171185  |
| 1.50  | 0.00505607      | -0.00758362 | 0.01588444  | 0.01652681  | 0.00632297         | 0.01412229  | 0.01675262  | 0.01775409  | 0.01143165        | 0.00900753  | 0.03074334  | 0.03308416  |
| 1.34  | 0.00517485      | -0.00987138 | 0.01748587  | 0.01819678  | 0.00845523         | 0.01686426  | 0.02216454  | 0.02439295  | 0.01367324        | 0.00716983  | 0.03899748  | 0.04233896  |
| 1.15  | 0.00498943      | -0.01125053 | 0.01818663  | 0.01894778  | 0.01149976         | 0.01469635  | 0.03251746  | 0.03622823  | 0.01651819        | 0.00345925  | 0.05021609  | 0.05488159  |
| 1.00  | 0.00456203      | -0.01067812 | 0.01753363  | 0.01829316  | 0.01429592         | 0.01003447  | 0.04295313  | 0.04789190  | 0.01887543        | -0.00060182 | 0.06001523  | 0.06588378  |
| 0.75  | 0.00334977      | -0.00556552 | 0.01386791  | 0.01449454  | 0.01937045         | -0.00335484 | 0.06330819  | 0.07067806  | 0.02272303        | -0.00883466 | 0.07678730  | 0.08492494  |
| 0.50  | 0.00181277      | 0.00361237  | 0.00807761  | 0.00829531  | 0.02421664         | -0.02106377 | 0.08411494  | 0.09411378  | 0.02602670        | -0.01724275 | 0.09181033  | 0.10227187  |
| 0.25  | 0.00051143      | 0.00225448  | 0.00241674  | 0.01314998  | 0.02776194         | -0.03664155 | 0.10006212  | 0.11217664  | 0.02827186        | -0.02356009 | 0.10229692  | 0.11455944  |
| 0.00  | 0.00000000      | 0.00000000  | 0.00000038  | 0.01704714  | 0.02906878         | -0.04289593 | 0.10608285  | 0.11901733  | 0.02906878        | -0.02590793 | 0.10608302  | 0.11901738  |
| -0.25 | 0.00051143      | 0.00225448  | 0.00241674  | 0.01314998  | 0.02776194         | -0.03664155 | 0.10006212  | 0.11217664  | 0.02827186        | -0.02356009 | 0.10229692  | 0.11455944  |
| -0.50 | 0.00181277      | 0.00361237  | 0.00807761  | 0.00829531  | 0.02421664         | -0.02106377 | 0.08411494  | 0.09411378  | 0.02602670        | -0.01724275 | 0.09181033  | 0.10227187  |
| -0.75 | 0.00334977      | -0.00556552 | 0.01386791  | 0.01449454  | 0.01937045         | -0.00335484 | 0.06330819  | 0.07067806  | 0.02272303        | -0.00883466 | 0.07678730  | 0.08492494  |
| -1.00 | 0.00456203      | -0.01067812 | 0.01753363  | 0.01829316  | 0.01429592         | 0.01003447  | 0.04295313  | 0.04789190  | 0.01887543        | -0.00060182 | 0.06001523  | 0.06588378  |
| -1.15 | 0.00498943      | -0.01125053 | 0.01818663  | 0.01894778  | 0.01149976         | 0.01469635  | 0.03251746  | 0.03622823  | 0.01651819        | 0.00345925  | 0.05021609  | 0.05488159  |
| -1.34 | 0.00517485      | -0.00987138 | 0.01748587  | 0.01819678  | 0.00845523         | 0.01686426  | 0.02216454  | 0.02439295  | 0.01367324        | 0.00716983  | 0.03899748  | 0.04233896  |
| -1.50 | 0.00505607      | -0.00758362 | 0.01588444  | 0.01652681  | 0.00632297         | 0.01412229  | 0.01675262  | 0.01775409  | 0.01143165        | 0.00900753  | 0.03074334  | 0.03308416  |
| -1.75 | 0.00450993      | -0.00360402 | 0.01249508  | 0.01300956  | 0.00386473         | 0.00744727  | 0.00880909  | 0.01434352  | 0.00843403        | 0.00960916  | 0.02078692  | 0.02171185  |
| -2.00 | 0.00373533      | -0.00044797 | 0.00902036  | 0.00939146  | 0.00226535         | 0.00357199  | 0.00433726  | 0.01028154  | 0.00605733        | 0.00817073  | 0.01368530  | 0.01412680  |
| -2.50 | 0.00219676      | 0.00205514  | 0.00403526  | 0.00410667  | 0.00071595         | 0.00069804  | 0.00090290  | 0.00404272  | 0.00295016        | 0.00380969  | 0.00501087  | 0.00706447  |
| -3.00 | 0.00112882      | 0.00145326  | 0.00158360  | 0.00201946  | 0.00021342         | 0.00012761  | 0.00016942  | 0.00130480  | 0.00136321        | 0.00149171  | 0.00175245  | 0.00345492  |
| -3.50 | 0.00052703      | 0.00057492  | 0.00058282  | 0.00121696  | 0.00006181         | 0.00002468  | 0.00003302  | 0.00039519  | 0.00060103        | 0.00056021  | 0.00061255  | 0.00166364  |
| -4.00 | 0.00022594      | 0.00020697  | 0.00020799  | 0.00066177  | 0.00001754         | 0.00000406  | 0.00000733  | 0.00011857  | 0.00025059        | 0.00019330  | 0.00021308  | 0.00080131  |
| -5.00 | 0.00003266      | 0.00001703  | 0.00002282  | 0.00014601  | 0.00000151         | -0.00000014 | 0.00000067  | 0.00000978  | 0.00003580        | 0.00001395  | 0.00002320  | 0.00016229  |

**T2 (continued).** The values of electron density and its Hessian's eigenvalues of  $\rho_{total}$ ,  $\rho_{\sigma}$  and  $\rho_{\pi}$  in atomic units for  $C_5H_4BH_2^-$ . The highlighted cells display the position of RCPs of  $\rho_{\pi}$ .

| R(Å)  | $\rho(r)_{\pi}$ |             |             |             | $\rho(r)_{\sigma}$ |             |             |             | $\rho(r)_{total}$ |             |             |             |
|-------|-----------------|-------------|-------------|-------------|--------------------|-------------|-------------|-------------|-------------------|-------------|-------------|-------------|
|       | $\rho$          | $\lambda_1$ | $\lambda_2$ | $\lambda_3$ | $\rho$             | $\lambda_1$ | $\lambda_2$ | $\lambda_3$ | $\rho$            | $\lambda_1$ | $\lambda_2$ | $\lambda_3$ |
| 5.00  | 0.00009837      | 0.00007921  | 0.00009179  | 0.00026390  | 0.00000224         | 0.00000229  | 0.00000289  | 0.00001477  | 0.00010085        | 0.00007882  | 0.00009522  | 0.00028186  |
| 4.00  | 0.00047981      | 0.00037046  | 0.00046235  | 0.00095649  | 0.00002640         | 0.00002907  | 0.00003160  | 0.00014534  | 0.00050934        | 0.00038181  | 0.00049697  | 0.00112218  |
| 3.00  | 0.00195994      | 0.00206545  | 0.00267348  | 0.00333109  | 0.00029839         | 0.00040130  | 0.00040354  | 0.00198080  | 0.00227726        | 0.00235097  | 0.00311018  | 0.00543278  |
| 2.50  | 0.00375908      | 0.00420719  | 0.00508123  | 0.00661358  | 0.00107229         | 0.00172184  | 0.00172251  | 0.00671122  | 0.00487319        | 0.00648454  | 0.00843092  | 0.01121520  |
| 2.00  | 0.00650228      | -0.00022619 | 0.01103091  | 0.01447838  | 0.00365421         | 0.00693718  | 0.00695889  | 0.01737454  | 0.01023608        | 0.01597290  | 0.01898852  | 0.02166153  |
| 1.75  | 0.00793670      | -0.00599421 | 0.01496012  | 0.01966803  | 0.00639091         | 0.01310766  | 0.01318031  | 0.02409475  | 0.01442721        | 0.01781425  | 0.02807638  | 0.03316260  |
| 1.50  | 0.00898814      | -0.01329581 | 0.01877841  | 0.02470555  | 0.01062512         | 0.02355140  | 0.02377253  | 0.02915160  | 0.01972697        | 0.01562555  | 0.04215494  | 0.04888110  |
| 1.32  | 0.00925918      | -0.01802081 | 0.02083665  | 0.02741809  | 0.01480205         | 0.02966263  | 0.03479853  | 0.03523888  | 0.02417785        | 0.01139760  | 0.05541327  | 0.06310700  |
| 1.15  | 0.00898710      | -0.02043367 | 0.02166988  | 0.02851801  | 0.01957310         | 0.02604714  | 0.04867631  | 0.04949633  | 0.02867211        | 0.00534755  | 0.07013903  | 0.07848142  |
| 1.00  | 0.00826373      | -0.01978386 | 0.02115446  | 0.02784690  | 0.02442550         | 0.01844964  | 0.06388819  | 0.06521494  | 0.03279060        | -0.00158720 | 0.08487007  | 0.09351369  |
| 0.75  | 0.00612531      | -0.01102649 | 0.01719532  | 0.02266201  | 0.03328487         | -0.00429494 | 0.09436725  | 0.09694439  | 0.03948298        | -0.01546203 | 0.11147175  | 0.11995999  |
| 0.50  | 0.00334348      | 0.00607743  | 0.01015297  | 0.01337466  | 0.04182705         | -0.03595384 | 0.12688817  | 0.13106485  | 0.04520897        | -0.02976484 | 0.13698485  | 0.14462095  |
| 0.25  | 0.00094916      | 0.00297699  | 0.00404036  | 0.02400433  | 0.04813493         | -0.06496849 | 0.15276881  | 0.15836893  | 0.04909473        | -0.04070598 | 0.15580463  | 0.16241600  |
| 0.00  | 0.00000000      | 0.00000000  | 0.00002968  | 0.03170918  | 0.05047353         | -0.07688490 | 0.16275083  | 0.16892983  | 0.05047353        | -0.04482354 | 0.16278343  | 0.16892983  |
| -0.25 | 0.00094916      | 0.00297699  | 0.00404036  | 0.02400433  | 0.04813493         | -0.06496849 | 0.15276881  | 0.15836893  | 0.04909473        | -0.04070598 | 0.15580463  | 0.16241600  |
| -0.50 | 0.00334348      | 0.00607743  | 0.01015297  | 0.01337466  | 0.04182705         | -0.03595384 | 0.12688817  | 0.13106485  | 0.04520897        | -0.02976484 | 0.13698485  | 0.14462095  |
| -0.75 | 0.00612531      | -0.01102649 | 0.01719532  | 0.02266201  | 0.03328487         | -0.00429494 | 0.09436725  | 0.09694439  | 0.03948298        | -0.01546203 | 0.11147175  | 0.11995999  |
| -1.00 | 0.00826373      | -0.01978386 | 0.02115446  | 0.02784690  | 0.02442550         | 0.01844964  | 0.06388819  | 0.06521494  | 0.03279060        | -0.00158720 | 0.08487007  | 0.09351369  |
| -1.15 | 0.00898710      | -0.02043367 | 0.02166988  | 0.02851801  | 0.01957310         | 0.02604714  | 0.04867631  | 0.04949633  | 0.02867211        | 0.00534755  | 0.07013903  | 0.07848142  |
| -1.32 | 0.00925918      | -0.01802081 | 0.02083665  | 0.02741809  | 0.01480205         | 0.02966263  | 0.03479853  | 0.03523888  | 0.02417785        | 0.01139760  | 0.05541327  | 0.06310700  |
| -1.50 | 0.00898814      | -0.01329581 | 0.01877841  | 0.02470555  | 0.01062512         | 0.02355140  | 0.02377253  | 0.02915160  | 0.01972697        | 0.01562555  | 0.04215494  | 0.04888110  |
| -1.75 | 0.00793670      | -0.00599421 | 0.01496012  | 0.01966803  | 0.00639091         | 0.01310766  | 0.01318031  | 0.02409475  | 0.01442721        | 0.01781425  | 0.02807638  | 0.03316260  |
| -2.00 | 0.00650228      | -0.00022619 | 0.01103091  | 0.01447838  | 0.00365421         | 0.00693718  | 0.00695889  | 0.01737454  | 0.01023608        | 0.01597290  | 0.01898852  | 0.02166153  |
| -2.50 | 0.00375908      | 0.00420719  | 0.00508123  | 0.00661358  | 0.00107229         | 0.00172184  | 0.00172251  | 0.00671122  | 0.00487319        | 0.00648454  | 0.00843092  | 0.01121520  |
| -3.00 | 0.00195994      | 0.00206545  | 0.00267348  | 0.00333109  | 0.00029839         | 0.00040130  | 0.00040354  | 0.00198080  | 0.00227726        | 0.00235097  | 0.00311018  | 0.00543278  |
| -4.00 | 0.00047981      | 0.00037046  | 0.00046235  | 0.00095649  | 0.00002640         | 0.00002907  | 0.00003160  | 0.00014534  | 0.00050934        | 0.00038181  | 0.00049697  | 0.00112218  |
| -5.00 | 0.00009837      | 0.00007921  | 0.00009179  | 0.00026390  | 0.00000224         | 0.00000229  | 0.00000289  | 0.00001477  | 0.00010085        | 0.00007882  | 0.00009522  | 0.00028186  |

**T2 (continued).** The values of electron density and its Hessian's eigenvalues of  $\rho_{total}$ ,  $\rho_{\sigma}$  and  $\rho_{\pi}$  in atomic units for  $C_5H_4CH_2$ . The highlighted cells display the position of RCPs of  $\rho_{\pi}$ .

| R(Å)  | $\rho(r)_{\pi}$ |             |             |             | $\rho(r)_{\sigma}$ |             |             |             | $\rho(r)_{total}$ |             |             |             |
|-------|-----------------|-------------|-------------|-------------|--------------------|-------------|-------------|-------------|-------------------|-------------|-------------|-------------|
|       | $\rho$          | $\lambda_1$ | $\lambda_2$ | $\lambda_3$ | $\rho$             | $\lambda_1$ | $\lambda_2$ | $\lambda_3$ | $\rho$            | $\lambda_1$ | $\lambda_2$ | $\lambda_3$ |
| 5.00  | 0.00007061      | 0.00002304  | 0.00006132  | 0.00023683  | 0.00000209         | 0.00000157  | 0.00000236  | 0.00001399  | 0.00007599        | 0.00001761  | 0.00006458  | 0.00026308  |
| 4.00  | 0.00040316      | 0.00014310  | 0.00037520  | 0.00092938  | 0.00002520         | 0.00002370  | 0.00003053  | 0.00014205  | 0.00044689        | 0.00012506  | 0.00041061  | 0.00112866  |
| 3.00  | 0.00179992      | 0.00114954  | 0.00247849  | 0.00342240  | 0.00029109         | 0.00035590  | 0.00043222  | 0.00194766  | 0.00217680        | 0.00129038  | 0.00294298  | 0.00564592  |
| 2.50  | 0.00356919      | 0.00320137  | 0.00453108  | 0.00637663  | 0.00105140         | 0.00158655  | 0.00184865  | 0.00661563  | 0.00479143        | 0.00437942  | 0.00829241  | 0.01160439  |
| 2.00  | 0.00633435      | 0.00010506  | 0.00787436  | 0.01425337  | 0.00359458         | 0.00659000  | 0.00736964  | 0.01715344  | 0.01022277        | 0.01310531  | 0.01845620  | 0.02168298  |
| 1.75  | 0.00780902      | -0.00573508 | 0.01114116  | 0.01944360  | 0.00629334         | 0.01259235  | 0.01384133  | 0.02378055  | 0.01445139        | 0.01694647  | 0.02451407  | 0.03324849  |
| 1.50  | 0.00891731      | -0.01324746 | 0.01459830  | 0.02443128  | 0.01047003         | 0.02283363  | 0.02472986  | 0.02872574  | 0.01976366        | 0.01470089  | 0.03786779  | 0.04886952  |
| 1.31  | 0.00923536      | -0.01849472 | 0.01683972  | 0.02720118  | 0.01493537         | 0.02905260  | 0.03487967  | 0.03740488  | 0.02453730        | 0.00978172  | 0.05239772  | 0.06393256  |
| 1.15  | 0.00900068      | -0.02081999 | 0.01788050  | 0.02805865  | 0.01929230         | 0.02553809  | 0.04764262  | 0.05073899  | 0.02862924        | 0.00400828  | 0.06659631  | 0.07765970  |
| 1.00  | 0.00830426      | -0.02031859 | 0.01787846  | 0.02730191  | 0.02407221         | 0.01799309  | 0.06273662  | 0.06642405  | 0.03266640        | -0.00287239 | 0.08224073  | 0.09198317  |
| 0.75  | 0.00618506      | -0.01160252 | 0.01507049  | 0.02207315  | 0.03279001         | -0.00442577 | 0.09306851  | 0.09776138  | 0.03916496        | -0.01611048 | 0.11104095  | 0.11675162  |
| 0.50  | 0.00338858      | 0.00551695  | 0.00948406  | 0.01294124  | 0.04118408         | -0.03545377 | 0.12551993  | 0.13111214  | 0.04466381        | -0.02917806 | 0.13912219  | 0.13941239  |
| 0.25  | 0.00096423      | 0.00271403  | 0.00386780  | 0.02432308  | 0.04737540         | -0.06378625 | 0.15138987  | 0.15761032  | 0.04836300        | -0.03884255 | 0.15553497  | 0.16003585  |
| 0.00  | 0.00000000      | 0.00000000  | 0.00000026  | 0.03223881  | 0.04966928         | -0.07540127 | 0.16137609  | 0.16782262  | 0.04966928        | -0.04241203 | 0.16137621  | 0.16782262  |
| -0.25 | 0.00096423      | 0.00271403  | 0.00386780  | 0.02432308  | 0.04737540         | -0.06378625 | 0.15138987  | 0.15761032  | 0.04836300        | -0.03884255 | 0.15553497  | 0.16003585  |
| -0.50 | 0.00338858      | 0.00551695  | 0.00948406  | 0.01294124  | 0.04118408         | -0.03545377 | 0.12551993  | 0.13111214  | 0.04466381        | -0.02917806 | 0.13912219  | 0.13941239  |
| -0.75 | 0.00618506      | -0.01160252 | 0.01507049  | 0.02207315  | 0.03279001         | -0.00442577 | 0.09306851  | 0.09776138  | 0.03916496        | -0.01611048 | 0.11104095  | 0.11675162  |
| -1.00 | 0.00830426      | -0.02031859 | 0.01787846  | 0.02730191  | 0.02407221         | 0.01799309  | 0.06273662  | 0.06642405  | 0.03266640        | -0.00287239 | 0.08224073  | 0.09198317  |
| -1.15 | 0.00900068      | -0.02081999 | 0.01788050  | 0.02805865  | 0.01929230         | 0.02553809  | 0.04764262  | 0.05073899  | 0.02862924        | 0.00400828  | 0.06659631  | 0.07765970  |
| -1.31 | 0.00923536      | -0.01849472 | 0.01683972  | 0.02720118  | 0.01493537         | 0.02905260  | 0.03487967  | 0.03740488  | 0.02453730        | 0.00978172  | 0.05239772  | 0.06393256  |
| -1.50 | 0.00891731      | -0.01324746 | 0.01459830  | 0.02443128  | 0.01047003         | 0.02283363  | 0.02472986  | 0.02872574  | 0.01976366        | 0.01470089  | 0.03786779  | 0.04886952  |
| -1.75 | 0.00780902      | -0.00573508 | 0.01114116  | 0.01944360  | 0.00629334         | 0.01259235  | 0.01384133  | 0.02378055  | 0.01445139        | 0.01694647  | 0.02451407  | 0.03324849  |
| -2.00 | 0.00633435      | 0.00010506  | 0.00787436  | 0.01425337  | 0.00359458         | 0.00659000  | 0.00736964  | 0.01715344  | 0.01022277        | 0.01310531  | 0.01845620  | 0.02168298  |
| -2.50 | 0.00356919      | 0.00320137  | 0.00453108  | 0.00637663  | 0.00105140         | 0.00158655  | 0.00184865  | 0.00661563  | 0.00479143        | 0.00437942  | 0.00829241  | 0.01160439  |
| -3.00 | 0.00179992      | 0.00114954  | 0.00247849  | 0.00342240  | 0.00029109         | 0.00035590  | 0.00043222  | 0.00194766  | 0.00217680        | 0.00129038  | 0.00294298  | 0.00564592  |
| -4.00 | 0.00040316      | 0.00014310  | 0.00037520  | 0.00092938  | 0.00002520         | 0.00002370  | 0.00003053  | 0.00014205  | 0.00044689        | 0.00012506  | 0.00041061  | 0.00112866  |
| -5.00 | 0.00007061      | 0.00002304  | 0.00006132  | 0.00023683  | 0.00000209         | 0.00000157  | 0.00000236  | 0.00001399  | 0.00007599        | 0.00001761  | 0.00006458  | 0.00026308  |



**T2 (continued).** The values of electron density and its Hessian's eigenvalues of  $\rho_{total}$ ,  $\rho_{\sigma}$  and  $\rho_{\pi}$  in atomic units for  $C_5H_4NH_2^+$ . The highlighted cells display the position of RCPs of  $\rho_{\pi}$ .

| R(Å)  | $\rho(r)_{\pi}$ |             |             |             | $\rho(r)_{\sigma}$ |             |             |             | $\rho(r)_{total}$ |             |             |             |
|-------|-----------------|-------------|-------------|-------------|--------------------|-------------|-------------|-------------|-------------------|-------------|-------------|-------------|
|       | $\rho$          | $\lambda_1$ | $\lambda_2$ | $\lambda_3$ | $\rho$             | $\lambda_1$ | $\lambda_2$ | $\lambda_3$ | $\rho$            | $\lambda_1$ | $\lambda_2$ | $\lambda_3$ |
| 5.00  | 0.00006208      | -0.00000996 | 0.00004494  | 0.00022750  | 0.00000176         | 0.00000105  | 0.00000194  | 0.00001181  | 0.00006573        | -0.00000928 | 0.00004642  | 0.00024568  |
| 4.00  | 0.00038171      | -0.00003656 | 0.00031694  | 0.00094787  | 0.00002273         | 0.00001771  | 0.00002821  | 0.00012498  | 0.00041610        | -0.00002050 | 0.00033917  | 0.00109910  |
| 3.00  | 0.00181611      | 0.00028458  | 0.00235659  | 0.00381228  | 0.00027847         | 0.00029715  | 0.00044217  | 0.00181959  | 0.00214717        | 0.00062785  | 0.00272165  | 0.00574372  |
| 2.50  | 0.00372714      | 0.00137830  | 0.00519643  | 0.00631580  | 0.00102556         | 0.00140265  | 0.00193073  | 0.00642550  | 0.00485326        | 0.00304511  | 0.00794812  | 0.01178690  |
| 2.00  | 0.00680418      | 0.00045945  | 0.00424535  | 0.01448699  | 0.00354724         | 0.00606208  | 0.00773421  | 0.01720630  | 0.01051502        | 0.01121487  | 0.01787749  | 0.02116942  |
| 1.75  | 0.00847608      | -0.00613666 | 0.00653198  | 0.01991563  | 0.00623251         | 0.01173023  | 0.01452810  | 0.02412884  | 0.01489526        | 0.01709253  | 0.02099402  | 0.03256219  |
| 1.50  | 0.00975516      | -0.01467197 | 0.00921757  | 0.02513305  | 0.01039404         | 0.02144512  | 0.02594504  | 0.02939791  | 0.02033897        | 0.01424734  | 0.03421478  | 0.04782107  |
| 1.30  | 0.01014921      | -0.02088453 | 0.01129467  | 0.02810916  | 0.01509464         | 0.02974485  | 0.03355106  | 0.04006175  | 0.02541522        | 0.00848856  | 0.05001895  | 0.06313111  |
| 1.15  | 0.00991683      | -0.02331499 | 0.01236867  | 0.02888160  | 0.01919081         | 0.02636203  | 0.04497893  | 0.05330362  | 0.02925439        | 0.00278703  | 0.06413885  | 0.07543833  |
| 1.00  | 0.00916723      | -0.02279443 | 0.01278863  | 0.02806296  | 0.02395750         | 0.01875539  | 0.05925473  | 0.06981576  | 0.03323922        | -0.00412165 | 0.08095487  | 0.08891496  |
| 0.75  | 0.00684220      | -0.01308486 | 0.01129250  | 0.02260043  | 0.03265005         | -0.00388130 | 0.08784029  | 0.10286586  | 0.03955056        | -0.01672579 | 0.11180671  | 0.11261179  |
| 0.50  | 0.00375275      | 0.00557696  | 0.00788911  | 0.01318148  | 0.04101763         | -0.03510587 | 0.11829137  | 0.13811246  | 0.04478891        | -0.02836124 | 0.13230661  | 0.14416525  |
| 0.25  | 0.00106838      | 0.00214135  | 0.00390640  | 0.02691086  | 0.04718786         | -0.06351104 | 0.14248567  | 0.16616093  | 0.04825883        | -0.03646530 | 0.14664615  | 0.16802554  |
| 0.00  | 0.00000000      | 0.00000000  | 0.00000000  | 0.03572600  | 0.04947358         | -0.07513030 | 0.15180841  | 0.17697973  | 0.04947358        | -0.03935022 | 0.15180841  | 0.17697973  |
| -0.25 | 0.00106838      | 0.00214135  | 0.00390640  | 0.02691086  | 0.04718786         | -0.06351104 | 0.14248567  | 0.16616093  | 0.04825883        | -0.03646530 | 0.14664615  | 0.16802554  |
| -0.50 | 0.00375275      | 0.00557696  | 0.00788911  | 0.01318148  | 0.04101763         | -0.03510587 | 0.11829137  | 0.13811246  | 0.04478891        | -0.02836124 | 0.13230661  | 0.14416525  |
| -0.75 | 0.00684220      | -0.01308486 | 0.01129250  | 0.02260043  | 0.03265005         | -0.00388130 | 0.08784029  | 0.10286586  | 0.03955056        | -0.01672579 | 0.11180671  | 0.11261179  |
| -1.00 | 0.00916723      | -0.02279443 | 0.01278863  | 0.02806296  | 0.02395750         | 0.01875539  | 0.05925473  | 0.06981576  | 0.03323922        | -0.00412165 | 0.08095487  | 0.08891496  |
| -1.15 | 0.00991683      | -0.02331499 | 0.01236867  | 0.02888160  | 0.01919081         | 0.02636203  | 0.04497893  | 0.05330362  | 0.02925439        | 0.00278703  | 0.06413885  | 0.07543833  |
| -1.30 | 0.01014921      | -0.02088453 | 0.01129467  | 0.02810916  | 0.01509464         | 0.02974485  | 0.03355106  | 0.04006175  | 0.02541522        | 0.00848856  | 0.05001895  | 0.06313111  |
| -1.50 | 0.00975516      | -0.01467197 | 0.00921757  | 0.02513305  | 0.01039404         | 0.02144512  | 0.02594504  | 0.02939791  | 0.02033897        | 0.01424734  | 0.03421478  | 0.04782107  |
| -1.75 | 0.00847608      | -0.00613666 | 0.00653198  | 0.01991563  | 0.00623251         | 0.01173023  | 0.01452810  | 0.02412884  | 0.01489526        | 0.01709253  | 0.02099402  | 0.03256219  |
| -2.00 | 0.00680418      | 0.00045945  | 0.00424535  | 0.01448699  | 0.00354724         | 0.00606208  | 0.00773421  | 0.01720630  | 0.01051502        | 0.01121487  | 0.01787749  | 0.02116942  |
| -2.50 | 0.00372714      | 0.00137830  | 0.00519643  | 0.00631580  | 0.00102556         | 0.00140265  | 0.00193073  | 0.00642550  | 0.00485326        | 0.00304511  | 0.00794812  | 0.01178690  |
| -3.00 | 0.00181611      | 0.00028458  | 0.00235659  | 0.00381228  | 0.00027847         | 0.00029715  | 0.00044217  | 0.00181959  | 0.00214717        | 0.00062785  | 0.00272165  | 0.00574372  |
| -4.00 | 0.00038171      | -0.00003656 | 0.00031694  | 0.00094787  | 0.00002273         | 0.00001771  | 0.00002821  | 0.00012498  | 0.00041610        | -0.00002050 | 0.00033917  | 0.00109910  |
| -5.00 | 0.00006208      | -0.00000996 | 0.00004494  | 0.00022750  | 0.00000176         | 0.00000105  | 0.00000194  | 0.00001181  | 0.00006573        | -0.00000928 | 0.00004642  | 0.00024568  |

**T2 (continued).** The values of electron density and its Hessian's eigenvalues of  $\rho_{total}$ ,  $\rho_{\sigma}$  and  $\rho_{\pi}$  in atomic units for  $C_5H_4O$ . The highlighted cells display the position of RCPs of  $\rho_{\pi}$ .

| R(Å)  | $\rho(r)_{\pi}$ |             |             |             | $\rho(r)_{\sigma}$ |             |             |             | $\rho(r)_{total}$ |             |             |             |
|-------|-----------------|-------------|-------------|-------------|--------------------|-------------|-------------|-------------|-------------------|-------------|-------------|-------------|
|       | $\rho$          | $\lambda_1$ | $\lambda_2$ | $\lambda_3$ | $\rho$             | $\lambda_1$ | $\lambda_2$ | $\lambda_3$ | $\rho$            | $\lambda_1$ | $\lambda_2$ | $\lambda_3$ |
| 5.00  | 0.00006909      | -0.00000527 | 0.00005467  | 0.00023086  | 0.00000210         | 0.00000162  | 0.00000254  | 0.00001432  | 0.00007751        | -0.00000726 | 0.00005881  | 0.00026491  |
| 4.00  | 0.00038805      | -0.00000429 | 0.00034982  | 0.00090230  | 0.00002590         | 0.00002266  | 0.00003149  | 0.00014751  | 0.00044986        | -0.00000598 | 0.00039138  | 0.00112671  |
| 3.00  | 0.00171884      | 0.00050273  | 0.00235008  | 0.00328300  | 0.00029753         | 0.00035405  | 0.00045807  | 0.00193487  | 0.00217056        | 0.00071634  | 0.00289848  | 0.00554328  |
| 2.50  | 0.00340152      | 0.00187359  | 0.00428504  | 0.00602718  | 0.00105536         | 0.00160124  | 0.00193993  | 0.00643174  | 0.00474848        | 0.00319117  | 0.00822935  | 0.01121292  |
| 2.00  | 0.00602700      | 0.00007911  | 0.00526321  | 0.01335844  | 0.00354124         | 0.00665310  | 0.00757614  | 0.01639067  | 0.01004544        | 0.01100225  | 0.01722532  | 0.02154967  |
| 1.75  | 0.00742559      | -0.00547323 | 0.00780867  | 0.01810848  | 0.00614988         | 0.01266189  | 0.01406922  | 0.02252759  | 0.01412844        | 0.01543962  | 0.02154295  | 0.03298707  |
| 1.50  | 0.00847664      | -0.01260736 | 0.01068299  | 0.02257335  | 0.01015784         | 0.02280937  | 0.02484599  | 0.02693772  | 0.01921455        | 0.01314236  | 0.03382180  | 0.04830535  |
| 1.31  | 0.00877913      | -0.01760303 | 0.01271575  | 0.02495280  | 0.01442657         | 0.02696261  | 0.03463849  | 0.03726308  | 0.02375618        | 0.00821424  | 0.04768567  | 0.06295334  |
| 1.15  | 0.00855788      | -0.01981502 | 0.01381124  | 0.02557290  | 0.01855265         | 0.02342863  | 0.04698706  | 0.05013285  | 0.02760303        | 0.00265632  | 0.06131547  | 0.07610562  |
| 1.00  | 0.00789870      | -0.01935749 | 0.01409094  | 0.02472728  | 0.02307164         | 0.01616322  | 0.06149041  | 0.06517315  | 0.03138265        | -0.00380393 | 0.07647061  | 0.08973064  |
| 0.75  | 0.00588839      | -0.01111519 | 0.01223672  | 0.01979507  | 0.03127183         | -0.00490132 | 0.09029877  | 0.09490030  | 0.03741386        | -0.01582396 | 0.10455070  | 0.11299603  |
| 0.50  | 0.00322942      | 0.00470447  | 0.00840012  | 0.01151929  | 0.03912409         | -0.03356706 | 0.12074953  | 0.12619193  | 0.04246620        | -0.02725651 | 0.13208236  | 0.13398662  |
| 0.25  | 0.00091970      | 0.00222766  | 0.00343650  | 0.02322159  | 0.04489199         | -0.05947888 | 0.14481756  | 0.15086418  | 0.04583853        | -0.03547025 | 0.14876213  | 0.15266003  |
| 0.00  | 0.00000000      | 0.00000000  | 0.00000059  | 0.03075979  | 0.04702428         | -0.07004959 | 0.15406743  | 0.16033561  | 0.04702428        | -0.03845538 | 0.15406781  | 0.16033561  |
| -0.25 | 0.00091970      | 0.00222766  | 0.00343650  | 0.02322159  | 0.04489199         | -0.05947888 | 0.14481756  | 0.15086418  | 0.04583853        | -0.03547025 | 0.14876213  | 0.15266003  |
| -0.50 | 0.00322942      | 0.00470447  | 0.00840012  | 0.01151929  | 0.03912409         | -0.03356706 | 0.12074953  | 0.12619193  | 0.04246620        | -0.02725651 | 0.13208236  | 0.13398662  |
| -0.75 | 0.00588839      | -0.01111519 | 0.01223672  | 0.01979507  | 0.03127183         | -0.00490132 | 0.09029877  | 0.09490030  | 0.03741386        | -0.01582396 | 0.10455070  | 0.11299603  |
| -1.00 | 0.00789870      | -0.01935749 | 0.01409094  | 0.02472728  | 0.02307164         | 0.01616322  | 0.06149041  | 0.06517315  | 0.03138265        | -0.00380393 | 0.07647061  | 0.08973064  |
| -1.15 | 0.00855788      | -0.01981502 | 0.01381124  | 0.02557290  | 0.01855265         | 0.02342863  | 0.04698706  | 0.05013285  | 0.02760303        | 0.00265632  | 0.06131547  | 0.07610562  |
| -1.31 | 0.00877913      | -0.01760303 | 0.01271575  | 0.02495280  | 0.01442657         | 0.02696261  | 0.03463849  | 0.03726308  | 0.02375618        | 0.00821424  | 0.04768567  | 0.06295334  |
| -1.50 | 0.00847664      | -0.01260736 | 0.01068299  | 0.02257335  | 0.01015784         | 0.02280937  | 0.02484599  | 0.02693772  | 0.01921455        | 0.01314236  | 0.03382180  | 0.04830535  |
| -1.75 | 0.00742559      | -0.00547323 | 0.00780867  | 0.01810848  | 0.00614988         | 0.01266189  | 0.01406922  | 0.02252759  | 0.01412844        | 0.01543962  | 0.02154295  | 0.03298707  |
| -2.00 | 0.00602700      | 0.00007911  | 0.00526321  | 0.01335844  | 0.00354124         | 0.00665310  | 0.00757614  | 0.01639067  | 0.01004544        | 0.01100225  | 0.01722532  | 0.02154967  |
| -2.50 | 0.00340152      | 0.00187359  | 0.00428504  | 0.00602718  | 0.00105536         | 0.00160124  | 0.00193993  | 0.00643174  | 0.00474848        | 0.00319117  | 0.00822935  | 0.01121292  |
| -3.00 | 0.00171884      | 0.00050273  | 0.00235008  | 0.00328300  | 0.00029753         | 0.00035405  | 0.00045807  | 0.00193487  | 0.00217056        | 0.00071634  | 0.00289848  | 0.00554328  |
| -4.00 | 0.00038805      | -0.00000429 | 0.00034982  | 0.00090230  | 0.00002590         | 0.00002266  | 0.00003149  | 0.00014751  | 0.00044986        | -0.00000598 | 0.00039138  | 0.00112671  |
| -5.00 | 0.00006909      | -0.00000527 | 0.00005467  | 0.00023086  | 0.00000210         | 0.00000162  | 0.00000254  | 0.00001432  | 0.00007751        | -0.00000726 | 0.00005881  | 0.00026491  |

**T2 (continued).** The values of electron density and its Hessian's eigenvalues of  $\rho_{total}$ ,  $\rho_{\sigma}$  and  $\rho_{\pi}$  in atomic units for  $C_7H_6BH_2^-$ . The highlighted cells display the position of RCPs of  $\rho_{\pi}$ .

| R(Å)  | $\rho(r)_{\pi}$ |             |             |             | $\rho(r)_{\sigma}$ |             |             |             | $\rho(r)_{total}$ |             |             |             |
|-------|-----------------|-------------|-------------|-------------|--------------------|-------------|-------------|-------------|-------------------|-------------|-------------|-------------|
|       | $\rho$          | $\lambda_1$ | $\lambda_2$ | $\lambda_3$ | $\rho$             | $\lambda_1$ | $\lambda_2$ | $\lambda_3$ | $\rho$            | $\lambda_1$ | $\lambda_2$ | $\lambda_3$ |
| 5.00  | 0.00005541      | 0.00003560  | 0.00005224  | 0.00013852  | 0.00000261         | 0.00000101  | 0.00000106  | 0.00001681  | 0.00005796        | 0.00003684  | 0.00005323  | 0.00015523  |
| 4.00  | 0.00025036      | 0.00019154  | 0.00028702  | 0.00036884  | 0.00002883         | 0.00001711  | 0.00001963  | 0.00012849  | 0.00027909        | 0.00021035  | 0.00030604  | 0.00049732  |
| 3.00  | 0.00080692      | 0.00046922  | 0.00088385  | 0.00131541  | 0.00022357         | 0.00022727  | 0.00025900  | 0.00079798  | 0.00103054        | 0.00111977  | 0.00126901  | 0.00157028  |
| 2.50  | 0.00125303      | 0.00007750  | 0.00178165  | 0.00263976  | 0.00057522         | 0.00081491  | 0.00092393  | 0.00182426  | 0.00182863        | 0.00190036  | 0.00262169  | 0.00355386  |
| 2.00  | 0.00170108      | -0.00111415 | 0.00314455  | 0.00464593  | 0.00139544         | 0.00268178  | 0.00304564  | 0.00339219  | 0.00309748        | 0.00227477  | 0.00587531  | 0.00767174  |
| 1.70  | 0.00185664      | -0.00211225 | 0.00394664  | 0.00582473  | 0.00226652         | 0.00407416  | 0.00507829  | 0.00577679  | 0.00412449        | 0.00196178  | 0.00908455  | 0.01157504  |
| 1.59  | 0.00187082      | -0.00243829 | 0.00416590  | 0.00614623  | 0.00267606         | 0.00412606  | 0.00629644  | 0.00717307  | 0.00454833        | 0.00168602  | 0.01052759  | 0.01329080  |
| 1.30  | 0.00175983      | -0.00285273 | 0.00436614  | 0.00643591  | 0.00398581         | 0.00336187  | 0.01048527  | 0.01198654  | 0.00574726        | 0.00050543  | 0.01492347  | 0.01839127  |
| 1.15  | 0.00161014      | -0.00265915 | 0.00418998  | 0.00617292  | 0.00477956         | 0.00232337  | 0.01319345  | 0.01510813  | 0.00639128        | -0.00033982 | 0.01745400  | 0.02125058  |
| 1.00  | 0.00140129      | -0.00210966 | 0.00380284  | 0.00559882  | 0.00562470         | 0.00081774  | 0.01618930  | 0.01856845  | 0.00702746        | -0.00129573 | 0.02005733  | 0.02413920  |
| 0.75  | 0.00095891      | -0.00043716 | 0.00275535  | 0.00404969  | 0.00705160         | -0.00253244 | 0.02146816  | 0.02468122  | 0.00801161        | -0.00297157 | 0.02427190  | 0.02871022  |
| 0.50  | 0.00049212      | 0.00147295  | 0.00176956  | 0.00215753  | 0.00831825         | -0.00624355 | 0.02635186  | 0.03035152  | 0.00881096        | -0.00447310 | 0.02785147  | 0.03249794  |
| 0.25  | 0.00013433      | 0.00041220  | 0.00059681  | 0.00367334  | 0.00919872         | -0.00918399 | 0.02984249  | 0.03441222  | 0.00933322        | -0.00550636 | 0.03026216  | 0.03500603  |
| 0.00  | 0.00000000      | 0.00000000  | 0.00000016  | 0.00442752  | 0.00951484         | -0.01030664 | 0.03111348  | 0.03589231  | 0.00951484        | -0.00587351 | 0.03111348  | 0.03589246  |
| -0.25 | 0.00013433      | 0.00041220  | 0.00059681  | 0.00367334  | 0.00919872         | -0.00918399 | 0.02984249  | 0.03441222  | 0.00933322        | -0.00550636 | 0.03026216  | 0.03500603  |
| -0.50 | 0.00049212      | 0.00147295  | 0.00176956  | 0.00215753  | 0.00831825         | -0.00624355 | 0.02635186  | 0.03035152  | 0.00881096        | -0.00447310 | 0.02785147  | 0.03249794  |
| -0.75 | 0.00095891      | -0.00043716 | 0.00275535  | 0.00404969  | 0.00705160         | -0.00253244 | 0.02146816  | 0.02468122  | 0.00801161        | -0.00297157 | 0.02427190  | 0.02871022  |
| -1.00 | 0.00140129      | -0.00210966 | 0.00380284  | 0.00559882  | 0.00562470         | 0.00081774  | 0.01618930  | 0.01856845  | 0.00702746        | -0.00129573 | 0.02005733  | 0.02413920  |
| -1.15 | 0.00161014      | -0.00265915 | 0.00418998  | 0.00617292  | 0.00477956         | 0.00232337  | 0.01319345  | 0.01510813  | 0.00639128        | -0.00033982 | 0.01745400  | 0.02125058  |
| -1.30 | 0.00175983      | -0.00285273 | 0.00436614  | 0.00643591  | 0.00398581         | 0.00336187  | 0.01048527  | 0.01198654  | 0.00574726        | 0.00050543  | 0.01492347  | 0.01839127  |
| -1.59 | 0.00187082      | -0.00243829 | 0.00416590  | 0.00614623  | 0.00267606         | 0.00412606  | 0.00629644  | 0.00717307  | 0.00454833        | 0.00168602  | 0.01052759  | 0.01329080  |
| -1.70 | 0.00185664      | -0.00211225 | 0.00394664  | 0.00582473  | 0.00226652         | 0.00407416  | 0.00507829  | 0.00577679  | 0.00412449        | 0.00196178  | 0.00908455  | 0.01157504  |
| -2.00 | 0.00170108      | -0.00111415 | 0.00314455  | 0.00464593  | 0.00139544         | 0.00268178  | 0.00304564  | 0.00339219  | 0.00309748        | 0.00227477  | 0.00587531  | 0.00767174  |
| -2.50 | 0.00125303      | 0.00007750  | 0.00178165  | 0.00263976  | 0.00057522         | 0.00081491  | 0.00092393  | 0.00182426  | 0.00182863        | 0.00190036  | 0.00262169  | 0.00355386  |
| -3.00 | 0.00080692      | 0.00046922  | 0.00088385  | 0.00131541  | 0.00022357         | 0.00022727  | 0.00025900  | 0.00079798  | 0.00103054        | 0.00111977  | 0.00126901  | 0.00157028  |
| -4.00 | 0.00025036      | 0.00019154  | 0.00028702  | 0.00036884  | 0.00002883         | 0.00001711  | 0.00001963  | 0.00012849  | 0.00027909        | 0.00021035  | 0.00030604  | 0.00049732  |
| -5.00 | 0.00005541      | 0.00003560  | 0.00005224  | 0.00013852  | 0.00000261         | 0.00000101  | 0.00000106  | 0.00001681  | 0.00005796        | 0.00003684  | 0.00005323  | 0.00015523  |

**T2 (continued).** The values of electron density and its Hessian's eigenvalues of  $\rho_{total}$ ,  $\rho_\sigma$  and  $\rho_\pi$  in atomic units for  $C_7H_6CH_2$ . The highlighted cells display the position of RCPs of  $\rho_\pi$ .

| R(Å)  | $\rho(r)_\pi$ |             |             |             | $\rho(r)_\sigma$ |             |             |             | $\rho(r)_{total}$ |             |             |             |
|-------|---------------|-------------|-------------|-------------|------------------|-------------|-------------|-------------|-------------------|-------------|-------------|-------------|
|       | $\rho$        | $\lambda_1$ | $\lambda_2$ | $\lambda_3$ | $\rho$           | $\lambda_1$ | $\lambda_2$ | $\lambda_3$ | $\rho$            | $\lambda_1$ | $\lambda_2$ | $\lambda_3$ |
| 5.00  | 0.00004477    | 0.00002525  | 0.00004443  | 0.00013433  | 0.00000231       | 0.00000071  | 0.00000083  | 0.00001560  | 0.00004709        | 0.00002587  | 0.00004528  | 0.00014995  |
| 4.00  | 0.00023037    | 0.00016276  | 0.00026621  | 0.00038350  | 0.00002674       | 0.00001547  | 0.00001777  | 0.00012203  | 0.00025712        | 0.00017774  | 0.00028416  | 0.00050558  |
| 3.00  | 0.00079611    | 0.00054341  | 0.00084121  | 0.00130908  | 0.00021270       | 0.00021912  | 0.00025346  | 0.00078279  | 0.00100884        | 0.00105725  | 0.00132705  | 0.00156347  |
| 2.50  | 0.00127001    | 0.00016227  | 0.00177028  | 0.00270644  | 0.00055523       | 0.00079402  | 0.00092940  | 0.00182562  | 0.00182528        | 0.00198713  | 0.00256034  | 0.00363788  |
| 2.00  | 0.00176485    | -0.00112206 | 0.00322614  | 0.00487245  | 0.00136793       | 0.00263594  | 0.00312319  | 0.00345418  | 0.00313282        | 0.00233186  | 0.00585361  | 0.00799953  |
| 1.70  | 0.00194909    | -0.00223858 | 0.00410649  | 0.00616979  | 0.00224119       | 0.00419277  | 0.00500955  | 0.00597208  | 0.00419032        | 0.00195424  | 0.00910474  | 0.01214696  |
| 1.56  | 0.00197240    | -0.00268742 | 0.00440008  | 0.00659768  | 0.00275498       | 0.00425278  | 0.00652735  | 0.00780056  | 0.00472741        | 0.00156536  | 0.01091533  | 0.01440376  |
| 1.30  | 0.00187098    | -0.00311991 | 0.00460565  | 0.00688169  | 0.00398019       | 0.00351227  | 0.01040599  | 0.01248670  | 0.00585118        | 0.00039239  | 0.01499887  | 0.01937426  |
| 1.15  | 0.00171836    | -0.00293674 | 0.00443690  | 0.00661703  | 0.00478736       | 0.00245863  | 0.01311804  | 0.01577169  | 0.00650573        | -0.00047806 | 0.01754259  | 0.02239443  |
| 1.00  | 0.00150040    | -0.00235953 | 0.00404005  | 0.00601346  | 0.00564894       | 0.00091763  | 0.01612356  | 0.01941816  | 0.00714934        | -0.00144184 | 0.02015231  | 0.02543686  |
| 0.75  | 0.00103123    | -0.00055228 | 0.00293959  | 0.00435840  | 0.00710755       | -0.00253370 | 0.02143042  | 0.02586932  | 0.00813878        | -0.00308590 | 0.02436172  | 0.03023158  |
| 0.50  | 0.00053085    | 0.00157578  | 0.00186216  | 0.00232183  | 0.00840566       | -0.00637435 | 0.02635002  | 0.03186183  | 0.00893651        | -0.00451266 | 0.02792183  | 0.03418573  |
| 0.25  | 0.00014516    | 0.00044175  | 0.00063878  | 0.00395607  | 0.00930951       | -0.00942507 | 0.02987115  | 0.03615724  | 0.00945467        | -0.00546905 | 0.03031167  | 0.03679660  |
| 0.00  | 0.00000000    | 0.00000000  | 0.00000043  | 0.00478744  | 0.00963428       | -0.01059116 | 0.03115415  | 0.03772360  | 0.00963428        | -0.00580377 | 0.03115415  | 0.03772403  |
| -0.25 | 0.00014516    | 0.00044175  | 0.00063878  | 0.00395607  | 0.00930951       | -0.00942507 | 0.02987115  | 0.03615724  | 0.00945467        | -0.00546905 | 0.03031167  | 0.03679660  |
| -0.50 | 0.00053085    | 0.00157578  | 0.00186216  | 0.00232183  | 0.00840566       | -0.00637435 | 0.02635002  | 0.03186183  | 0.00893651        | -0.00451266 | 0.02792183  | 0.03418573  |
| -0.75 | 0.00103123    | -0.00055228 | 0.00293959  | 0.00435840  | 0.00710755       | -0.00253370 | 0.02143042  | 0.02586932  | 0.00813878        | -0.00308590 | 0.02436172  | 0.03023158  |
| -1.00 | 0.00150040    | -0.00235953 | 0.00404005  | 0.00601346  | 0.00564894       | 0.00091763  | 0.01612356  | 0.01941816  | 0.00714934        | -0.00144184 | 0.02015231  | 0.02543686  |
| -1.15 | 0.00171836    | -0.00293674 | 0.00443690  | 0.00661703  | 0.00478736       | 0.00245863  | 0.01311804  | 0.01577169  | 0.00650573        | -0.00047806 | 0.01754259  | 0.02239443  |
| -1.30 | 0.00187098    | -0.00311991 | 0.00460565  | 0.00688169  | 0.00398019       | 0.00351227  | 0.01040599  | 0.01248670  | 0.00585118        | 0.00039239  | 0.01499887  | 0.01937426  |
| -1.56 | 0.00197240    | -0.00268742 | 0.00440008  | 0.00659768  | 0.00275498       | 0.00425278  | 0.00652735  | 0.00780056  | 0.00472741        | 0.00156536  | 0.01091533  | 0.01440376  |
| -1.70 | 0.00194909    | -0.00223858 | 0.00410649  | 0.00616979  | 0.00224119       | 0.00419277  | 0.00500955  | 0.00597208  | 0.00419032        | 0.00195424  | 0.00910474  | 0.01214696  |
| -2.00 | 0.00176485    | -0.00112206 | 0.00322614  | 0.00487245  | 0.00136793       | 0.00263594  | 0.00312319  | 0.00345418  | 0.00313282        | 0.00233186  | 0.00585361  | 0.00799953  |
| -2.50 | 0.00127001    | 0.00016227  | 0.00177028  | 0.00270644  | 0.00055523       | 0.00079402  | 0.00092940  | 0.00182562  | 0.00182528        | 0.00198713  | 0.00256034  | 0.00363788  |
| -3.00 | 0.00079611    | 0.00054341  | 0.00084121  | 0.00130908  | 0.00021270       | 0.00021912  | 0.00025346  | 0.00078279  | 0.00100884        | 0.00105725  | 0.00132705  | 0.00156347  |
| -4.00 | 0.00023037    | 0.00016276  | 0.00026621  | 0.00038350  | 0.00002674       | 0.00001547  | 0.00001777  | 0.00012203  | 0.00025712        | 0.00017774  | 0.00028416  | 0.00050558  |
| -5.00 | 0.00004477    | 0.00002525  | 0.00004443  | 0.00013433  | 0.00000231       | 0.00000071  | 0.00000083  | 0.00001560  | 0.00004709        | 0.00002587  | 0.00004528  | 0.00014995  |

**T2 (continued).** The values of electron density and its Hessian's eigenvalues of  $\rho_{total}$ ,  $\rho_{\sigma}$  and  $\rho_{\pi}$  in atomic units for  $C_7H_6NH_2^+$ . The highlighted cells display the position of RCPs of  $\rho_{\pi}$ .

| R(Å)  | $\rho(r)_{\pi}$ |             |             |             | $\rho(r)_{\sigma}$ |             |             |             | $\rho(r)_{total}$ |             |             |             |
|-------|-----------------|-------------|-------------|-------------|--------------------|-------------|-------------|-------------|-------------------|-------------|-------------|-------------|
|       | $\rho$          | $\lambda_1$ | $\lambda_2$ | $\lambda_3$ | $\rho$             | $\lambda_1$ | $\lambda_2$ | $\lambda_3$ | $\rho$            | $\lambda_1$ | $\lambda_2$ | $\lambda_3$ |
| 5.00  | 0.00003867      | 0.00002646  | 0.00003224  | 0.00013012  | 0.00000185         | 0.00000060  | 0.00000075  | 0.00001360  | 0.00004066        | 0.00002618  | 0.00003320  | 0.00014423  |
| 4.00  | 0.00021650      | 0.00018215  | 0.00021914  | 0.00038911  | 0.00002350         | 0.00001299  | 0.00001638  | 0.00011418  | 0.00024059        | 0.00019013  | 0.00023701  | 0.00050531  |
| 3.00  | 0.00078570      | 0.00062676  | 0.00100763  | 0.00120349  | 0.00019941         | 0.00020173  | 0.00024698  | 0.00078311  | 0.00098702        | 0.00116992  | 0.00143475  | 0.00145918  |
| 2.50  | 0.00128634      | 0.00028533  | 0.00218211  | 0.00260744  | 0.00053673         | 0.00076337  | 0.00093145  | 0.00187949  | 0.00182624        | 0.00214779  | 0.00293127  | 0.00355850  |
| 2.00  | 0.00183587      | -0.00109392 | 0.00406722  | 0.00486501  | 0.00135936         | 0.00261868  | 0.00320090  | 0.00363869  | 0.00319992        | 0.00253772  | 0.00663246  | 0.00810399  |
| 1.70  | 0.00205787      | -0.00236781 | 0.00523023  | 0.00626086  | 0.00225839         | 0.00446799  | 0.00505172  | 0.00618298  | 0.00432163        | 0.00209419  | 0.01020790  | 0.01249397  |
| 1.53  | 0.00209676      | -0.00300606 | 0.00569743  | 0.00682293  | 0.00292600         | 0.00453937  | 0.00702469  | 0.00860703  | 0.00502829        | 0.00152530  | 0.01264175  | 0.01548522  |
| 1.30  | 0.00200909      | -0.00346464 | 0.00592535  | 0.00709970  | 0.00407057         | 0.00381601  | 0.01064523  | 0.01305782  | 0.00608502        | 0.00034162  | 0.01648733  | 0.02021590  |
| 1.15  | 0.00185496      | -0.00330945 | 0.00572455  | 0.00686110  | 0.00491777         | 0.00271341  | 0.01347627  | 0.01654046  | 0.00677771        | -0.00060602 | 0.01912094  | 0.02345850  |
| 1.00  | 0.00162720      | -0.00270742 | 0.00522511  | 0.00626383  | 0.00582503         | 0.00108233  | 0.01662404  | 0.02041459  | 0.00745662        | -0.00163411 | 0.02177689  | 0.02673085  |
| 0.75  | 0.00112544      | -0.00073038 | 0.00381383  | 0.00457198  | 0.00736645         | -0.00260152 | 0.02220292  | 0.02728480  | 0.00849494        | -0.00333606 | 0.02596487  | 0.03189555  |
| 0.50  | 0.00058194      | 0.00195772  | 0.00205738  | 0.00245451  | 0.00874285         | -0.00672524 | 0.02739375  | 0.03368115  | 0.00932637        | -0.00475593 | 0.02941582  | 0.03615676  |
| 0.25  | 0.00015956      | 0.00057499  | 0.00068560  | 0.00432639  | 0.00970331         | -0.01001166 | 0.03111845  | 0.03827313  | 0.00986330        | -0.00567418 | 0.03168597  | 0.03896477  |
| 0.00  | 0.00000000      | 0.00000000  | 0.00000003  | 0.00526691  | 0.01004880         | -0.01126977 | 0.03247738  | 0.03994894  | 0.01004880        | -0.00598850 | 0.03247738  | 0.03994898  |
| -0.25 | 0.00015956      | 0.00057499  | 0.00068560  | 0.00432639  | 0.00970331         | -0.01001166 | 0.03111845  | 0.03827313  | 0.00986330        | -0.00567418 | 0.03168597  | 0.03896477  |
| -0.50 | 0.00058194      | 0.00195772  | 0.00205738  | 0.00245451  | 0.00874285         | -0.00672524 | 0.02739375  | 0.03368115  | 0.00932637        | -0.00475593 | 0.02941582  | 0.03615676  |
| -0.75 | 0.00112544      | -0.00073038 | 0.00381383  | 0.00457198  | 0.00736645         | -0.00260152 | 0.02220292  | 0.02728480  | 0.00849494        | -0.00333606 | 0.02596487  | 0.03189555  |
| -1.00 | 0.00162720      | -0.00270742 | 0.00522511  | 0.00626383  | 0.00582503         | 0.00108233  | 0.01662404  | 0.02041459  | 0.00745662        | -0.00163411 | 0.02177689  | 0.02673085  |
| -1.15 | 0.00185496      | -0.00330945 | 0.00572455  | 0.00686110  | 0.00491777         | 0.00271341  | 0.01347627  | 0.01654046  | 0.00677771        | -0.00060602 | 0.01912094  | 0.02345850  |
| -1.30 | 0.00200909      | -0.00346464 | 0.00592535  | 0.00709970  | 0.00407057         | 0.00381601  | 0.01064523  | 0.01305782  | 0.00608502        | 0.00034162  | 0.01648733  | 0.02021590  |
| -1.53 | 0.00209676      | -0.00300606 | 0.00569743  | 0.00682293  | 0.00292600         | 0.00453937  | 0.00702469  | 0.00860703  | 0.00502829        | 0.00152530  | 0.01264175  | 0.01548522  |
| -1.70 | 0.00205787      | -0.00236781 | 0.00523023  | 0.00626086  | 0.00225839         | 0.00446799  | 0.00505172  | 0.00618298  | 0.00432163        | 0.00209419  | 0.01020790  | 0.01249397  |
| -2.00 | 0.00183587      | -0.00109392 | 0.00406722  | 0.00486501  | 0.00135936         | 0.00261868  | 0.00320090  | 0.00363869  | 0.00319992        | 0.00253772  | 0.00663246  | 0.00810399  |
| -2.50 | 0.00128634      | 0.00028533  | 0.00218211  | 0.00260744  | 0.00053673         | 0.00076337  | 0.00093145  | 0.00187949  | 0.00182624        | 0.00214779  | 0.00293127  | 0.00355850  |
| -3.00 | 0.00078570      | 0.00062676  | 0.00100763  | 0.00120349  | 0.00019941         | 0.00020173  | 0.00024698  | 0.00078311  | 0.00098702        | 0.00116992  | 0.00143475  | 0.00145918  |
| -4.00 | 0.00021650      | 0.00018215  | 0.00021914  | 0.00038911  | 0.00002350         | 0.00001299  | 0.00001638  | 0.00011418  | 0.00024059        | 0.00019013  | 0.00023701  | 0.00050531  |
| -5.00 | 0.00003867      | 0.00002646  | 0.00003224  | 0.00013012  | 0.00000185         | 0.00000060  | 0.00000075  | 0.00001360  | 0.00004066        | 0.00002618  | 0.00003320  | 0.00014423  |

**T2 (continued).** The values of electron density and its Hessian's eigenvalues of  $\rho_{total}$ ,  $\rho_{\sigma}$  and  $\rho_{\pi}$  in atomic units for  $C_7H_6O$ . The highlighted cells display the position of RCPs of  $\rho_{\pi}$ .

| R(Å)  | $\rho(r)_{\pi}$ |             |             |             | $\rho(r)_{\sigma}$ |             |             |             | $\rho(r)_{total}$ |             |             |             |
|-------|-----------------|-------------|-------------|-------------|--------------------|-------------|-------------|-------------|-------------------|-------------|-------------|-------------|
|       | $\rho$          | $\lambda_1$ | $\lambda_2$ | $\lambda_3$ | $\rho$             | $\lambda_1$ | $\lambda_2$ | $\lambda_3$ | $\rho$            | $\lambda_1$ | $\lambda_2$ | $\lambda_3$ |
| 5.00  | 0.00004740      | 0.00002619  | 0.00004202  | 0.00013984  | 0.00000211         | 0.00000091  | 0.00000108  | 0.00001485  | 0.00004979        | 0.00002557  | 0.00004337  | 0.00015549  |
| 4.00  | 0.00023999      | 0.00017051  | 0.00025835  | 0.00039337  | 0.00002557         | 0.00001540  | 0.00001836  | 0.00012029  | 0.00026656        | 0.00017763  | 0.00027850  | 0.00051634  |
| 3.00  | 0.00082076      | 0.00055299  | 0.00090220  | 0.00130226  | 0.00020891         | 0.00021130  | 0.00025554  | 0.00078102  | 0.00103233        | 0.00105507  | 0.00136424  | 0.00156794  |
| 2.50  | 0.00130589      | 0.00016730  | 0.00190627  | 0.00271710  | 0.00054941         | 0.00076661  | 0.00094038  | 0.00182176  | 0.00185905        | 0.00196602  | 0.00263652  | 0.00367980  |
| 2.00  | 0.00181270      | -0.00114787 | 0.00348576  | 0.00491977  | 0.00135897         | 0.00255000  | 0.00316876  | 0.00344340  | 0.00317616        | 0.00228869  | 0.00593284  | 0.00813074  |
| 1.70  | 0.00200162      | -0.00229522 | 0.00444160  | 0.00624353  | 0.00222918         | 0.00417644  | 0.00485018  | 0.00606377  | 0.00423524        | 0.00187632  | 0.00915591  | 0.01236197  |
| 1.56  | 0.00202556      | -0.00275768 | 0.00476066  | 0.00668231  | 0.00274165         | 0.00423463  | 0.00632274  | 0.00792354  | 0.00477147        | 0.00147219  | 0.01093699  | 0.01466482  |
| 1.30  | 0.00192159      | -0.00320430 | 0.00498397  | 0.00697960  | 0.00396179         | 0.00349416  | 0.01008070  | 0.01268178  | 0.00588699        | 0.00028561  | 0.01491055  | 0.01972380  |
| 1.15  | 0.00176497      | -0.00301762 | 0.00480138  | 0.00671665  | 0.00476583         | 0.00244363  | 0.01270937  | 0.01601758  | 0.00653390        | -0.00057757 | 0.01736209  | 0.02279468  |
| 1.00  | 0.00154123      | -0.00242579 | 0.00437174  | 0.00610954  | 0.00562393         | 0.00090853  | 0.01562232  | 0.01971950  | 0.00716769        | -0.00151973 | 0.01985855  | 0.02588431  |
| 0.75  | 0.00105943      | -0.00057006 | 0.00318084  | 0.00443718  | 0.00707640         | -0.00252716 | 0.02076522  | 0.02626655  | 0.00813741        | -0.00309668 | 0.02384695  | 0.03074417  |
| 0.50  | 0.00054542      | 0.00169148  | 0.00192495  | 0.00237307  | 0.00836880         | -0.00634833 | 0.02553221  | 0.03234593  | 0.00891497        | -0.00443398 | 0.02718438  | 0.03474071  |
| 0.25  | 0.00014916      | 0.00047739  | 0.00066055  | 0.00406487  | 0.00926855         | -0.00938260 | 0.02894376  | 0.03670246  | 0.00941790        | -0.00531285 | 0.02940674  | 0.03736904  |
| 0.00  | 0.00000000      | 0.00000000  | 0.00000006  | 0.00491924  | 0.00959183         | -0.01054222 | 0.03018676  | 0.03829088  | 0.00959183        | -0.00561681 | 0.03018676  | 0.03829094  |
| -0.25 | 0.00014916      | 0.00047739  | 0.00066055  | 0.00406487  | 0.00926855         | -0.00938260 | 0.02894376  | 0.03670246  | 0.00941790        | -0.00531285 | 0.02940674  | 0.03736904  |
| -0.50 | 0.00054542      | 0.00169148  | 0.00192495  | 0.00237307  | 0.00836880         | -0.00634833 | 0.02553221  | 0.03234593  | 0.00891497        | -0.00443398 | 0.02718438  | 0.03474071  |
| -0.75 | 0.00105943      | -0.00057006 | 0.00318084  | 0.00443718  | 0.00707640         | -0.00252716 | 0.02076522  | 0.02626655  | 0.00813741        | -0.00309668 | 0.02384695  | 0.03074417  |
| -1.00 | 0.00154123      | -0.00242579 | 0.00437174  | 0.00610954  | 0.00562393         | 0.00090853  | 0.01562232  | 0.01971950  | 0.00716769        | -0.00151973 | 0.01985855  | 0.02588431  |
| -1.15 | 0.00176497      | -0.00301762 | 0.00480138  | 0.00671665  | 0.00476583         | 0.00244363  | 0.01270937  | 0.01601758  | 0.00653390        | -0.00057757 | 0.01736209  | 0.02279468  |
| -1.30 | 0.00192159      | -0.00320430 | 0.00498397  | 0.00697960  | 0.00396179         | 0.00349416  | 0.01008070  | 0.01268178  | 0.00588699        | 0.00028561  | 0.01491055  | 0.01972380  |
| -1.56 | 0.00202556      | -0.00275768 | 0.00476066  | 0.00668231  | 0.00274165         | 0.00423463  | 0.00632274  | 0.00792354  | 0.00477147        | 0.00147219  | 0.01093699  | 0.01466482  |
| -1.70 | 0.00200162      | -0.00229522 | 0.00444160  | 0.00624353  | 0.00222918         | 0.00417644  | 0.00485018  | 0.00606377  | 0.00423524        | 0.00187632  | 0.00915591  | 0.01236197  |
| -2.00 | 0.00181270      | -0.00114787 | 0.00348576  | 0.00491977  | 0.00135897         | 0.00255000  | 0.00316876  | 0.00344340  | 0.00317616        | 0.00228869  | 0.00593284  | 0.00813074  |
| -2.50 | 0.00130589      | 0.00016730  | 0.00190627  | 0.00271710  | 0.00054941         | 0.00076661  | 0.00094038  | 0.00182176  | 0.00185905        | 0.00196602  | 0.00263652  | 0.00367980  |
| -3.00 | 0.00082076      | 0.00055299  | 0.00090220  | 0.00130226  | 0.00020891         | 0.00021130  | 0.00025554  | 0.00078102  | 0.00103233        | 0.00105507  | 0.00136424  | 0.00156794  |
| -4.00 | 0.00023999      | 0.00017051  | 0.00025835  | 0.00039337  | 0.00002557         | 0.00001540  | 0.00001836  | 0.00012029  | 0.00026656        | 0.00017763  | 0.00027850  | 0.00051634  |
| -5.00 | 0.00004740      | 0.00002619  | 0.00004202  | 0.00013984  | 0.00000211         | 0.00000091  | 0.00000108  | 0.00001485  | 0.00004979        | 0.00002557  | 0.00004337  | 0.00015549  |
